# Supplementary material
Source: Research Square preprint supplement (doi:10.21203/rs.3.rs-10127364/v1)
Supplement: Supplementary file 1 [file 38508e75e7c5f4fe7307adce.xlsx]

## Sheet: GdnR_Phylogeny_cgdAB associated
Uniprot ID	Superkingdom	Kingdom	Phylum	Class	Order	Family	Genus	Species	Value
A0A431IN22	Bacteria	Bacillati	Actinomycetota	Acidimicrobiia	unclassified Acidimicrobiia	NA	NA	Acidimicrobiia bacterium	1
C7QC13	Bacteria	Bacillati	Actinomycetota	Actinomycetes	Catenulisporales	Catenulisporaceae	Catenulispora	Catenulispora acidiphila DSM 44928	1
A0A973R5J3	Bacteria	Bacillati	Actinomycetota	Actinomycetes	Catenulisporales	Catenulisporaceae	Catenulispora	Catenulispora sp.	1
A0A973P3Q3	Bacteria	Bacillati	Actinomycetota	Actinomycetes	Catenulisporales	Catenulisporaceae	Catenulispora	Catenulispora sp.	1
A0A1Q7VQE8	Bacteria	Bacillati	Actinomycetota	Actinomycetes	Catenulisporales	Catenulisporaceae	Catenulispora	Catenulispora sp. 13_1_20CM_3_70_7	1
A0A1M7R3K1	Bacteria	Bacillati	Actinomycetota	Actinomycetes	Cryptosporangiales	Cryptosporangiaceae	Cryptosporangium	Cryptosporangium aurantiacum	1
A0A545ART6	Bacteria	Bacillati	Actinomycetota	Actinomycetes	Cryptosporangiales	Cryptosporangiaceae	Cryptosporangium	Cryptosporangium phraense	1
E3J460	Bacteria	Bacillati	Actinomycetota	Actinomycetes	Frankiales	Frankiaceae	Pseudofrankia	Pseudofrankia inefficax	1
A0A4Y9M9S1	Bacteria	Bacillati	Actinomycetota	Actinomycetes	Geodermatophilales	Geodermatophilaceae	Blastococcus	Blastococcus sp. TF02A-35	1
A0A1H3NNA3	Bacteria	Bacillati	Actinomycetota	Actinomycetes	Geodermatophilales	Geodermatophilaceae	Geodermatophilus	Geodermatophilus africanus	1
L7EX56	Bacteria	Bacillati	Actinomycetota	Actinomycetes	Glycomycetales	Glycomycetaceae	Glycomyces	Glycomyces artemisiae	1
A0A1G7BBU0	Bacteria	Bacillati	Actinomycetota	Actinomycetes	Glycomycetales	Glycomycetaceae	Glycomyces	Glycomyces harbinensis	1
A0A9X3P8S8	Bacteria	Bacillati	Actinomycetota	Actinomycetes	Glycomycetales	Glycomycetaceae	Glycomyces	Glycomyces luteolus	1
A0A426V4C3	Bacteria	Bacillati	Actinomycetota	Actinomycetes	Glycomycetales	Glycomycetaceae	Glycomyces	Glycomyces terrestris	1
A0A6L9SHN3	Bacteria	Bacillati	Actinomycetota	Actinomycetes	Jiangellales	Jiangellaceae	Phytoactinopolyspora	Phytoactinopolyspora halotolerans	1
A0A7Y9DL75	Bacteria	Bacillati	Actinomycetota	Actinomycetes	Kineosporiales	Kineosporiaceae	Kineococcus	Kineococcus aurantiacus	1
A6W6F5	Bacteria	Bacillati	Actinomycetota	Actinomycetes	Kineosporiales	Kineosporiaceae	Kineococcus	Kineococcus radiotolerans Kineococcus radiotolerans SRS30216 = ATCC BAA-149	2
A0A2T0QZP3	Bacteria	Bacillati	Actinomycetota	Actinomycetes	Kineosporiales	Kineosporiaceae	Kineococcus	Kineococcus rhizosphaerae	1
A0A2S6ISP2	Bacteria	Bacillati	Actinomycetota	Actinomycetes	Kineosporiales	Kineosporiaceae	Kineococcus	Kineococcus xinjiangensis	1
A0A9X1NK12	Bacteria	Bacillati	Actinomycetota	Actinomycetes	Kineosporiales	Kineosporiaceae	Kineosporia	Kineosporia babensis	1
A0A9W4H7Q5	Bacteria	Bacillati	Actinomycetota	Actinomycetes	Kitasatosporales	Streptomycetaceae	Actinacidiphila	Actinacidiphila bryophytorum	1
A0A9W4EAN0	Bacteria	Bacillati	Actinomycetota	Actinomycetes	Kitasatosporales	Streptomycetaceae	Actinacidiphila	Actinacidiphila cocklensis	1
A0A4U0T904	Bacteria	Bacillati	Actinomycetota	Actinomycetes	Kitasatosporales	Streptomycetaceae	Actinacidiphila	Actinacidiphila oryziradicis	1
A0A1M7J0A9	Bacteria	Bacillati	Actinomycetota	Actinomycetes	Kitasatosporales	Streptomycetaceae	Actinacidiphila	Actinacidiphila paucisporea	1
A0A1H8RIU2	Bacteria	Bacillati	Actinomycetota	Actinomycetes	Kitasatosporales	Streptomycetaceae	Actinacidiphila	Actinacidiphila rubida	1
A0A919FY61	Bacteria	Bacillati	Actinomycetota	Actinomycetes	Kitasatosporales	Streptomycetaceae	Kitasatospora	Kitasatospora indigofera	1
A0AAU4MJC3	Bacteria	Bacillati	Actinomycetota	Actinomycetes	Kitasatosporales	Streptomycetaceae	Kitasatospora	Kitasatospora sp. NBC_00315	1
A0A0N1GB45	Bacteria	Bacillati	Actinomycetota	Actinomycetes	Kitasatosporales	Streptomycetaceae	Streptomyces	Actinobacteria bacterium OK074 Streptomyces albiflavescens Streptomyces montanus Streptomyces scabichelini Streptomyces sp. GKU 895 Streptomyces sp. NBC_00169 Streptomyces sp. NBC_00172 Streptomyces sp. NBC_00228 Streptomyces sp. NBC_00252 Streptomyces sp. NBC_00696 Streptomyces sp. NBC_01396 Streptomyces sp. S1D4-11 Streptomyces sp. TLI_55 Streptomyces sporangiiformans Streptomyces triticiradicis	15
A0A5N8WTM9	Bacteria	Bacillati	Actinomycetota	Actinomycetes	Kitasatosporales	Streptomycetaceae	Streptomyces	Streptomyces acidicola Streptomyces spongiae	2
A0A0L0JPZ1	Bacteria	Bacillati	Actinomycetota	Actinomycetes	Kitasatosporales	Streptomycetaceae	Streptomyces	Streptomyces acidiscabies Streptomyces sp. V2	2
A0A937EMK6	Bacteria	Bacillati	Actinomycetota	Actinomycetes	Kitasatosporales	Streptomycetaceae	Streptomyces	Streptomyces actinomycinicus	1
A0A1X7DXN0	Bacteria	Bacillati	Actinomycetota	Actinomycetes	Kitasatosporales	Streptomycetaceae	Streptomyces	Streptomyces antibioticus Streptomyces sp. Amel2xC10 Streptomyces sp. CAI-85	3
Q828G8	Bacteria	Bacillati	Actinomycetota	Actinomycetes	Kitasatosporales	Streptomycetaceae	Streptomyces	Streptomyces aquilus Streptomyces asoensis Streptomyces avermitilis Streptomyces avermitilis MA-4680 = NBRC 14893 Streptomyces sp. NBC_00015 Streptomyces sp. NBC_00016 Streptomyces sp. NBC_00080 Streptomyces sp. NBC_00637 Streptomyces sp. Root1310 Streptomyces sp. SID5469 Streptomyces sp. SLBN-115	11
A0A6M4PAS3	Bacteria	Bacillati	Actinomycetota	Actinomycetes	Kitasatosporales	Streptomycetaceae	Streptomyces	Streptomyces argyrophylli Streptomyces corchorusii	2
A0A5J6HYF8	Bacteria	Bacillati	Actinomycetota	Actinomycetes	Kitasatosporales	Streptomycetaceae	Streptomyces	Streptomyces aurantiogriseus Streptomyces coeruleorubidus Streptomyces collinus	3
A0A939FC18	Bacteria	Bacillati	Actinomycetota	Actinomycetes	Kitasatosporales	Streptomycetaceae	Streptomyces	Streptomyces beijiangensis Streptomyces sp. NBC_01465	2
D7CDP7	Bacteria	Bacillati	Actinomycetota	Actinomycetes	Kitasatosporales	Streptomycetaceae	Streptomyces	Streptomyces bingchenggensis BCW-1	1
A0A124C4I0	Bacteria	Bacillati	Actinomycetota	Actinomycetes	Kitasatosporales	Streptomycetaceae	Streptomyces	Streptomyces bottropensis ATCC 25435 Streptomyces caniscabiei Streptomyces europaeiscabiei Streptomyces phaeolivaceus Streptomyces scabiei Streptomyces scabiei 87.22 Streptomyces sp. DSM 40750 Streptomyces sp. NBC_00024 Streptomyces sp. NBC_00104 Streptomyces sp. NBC_00310 Streptomyces sp. NBC_00391 Streptomyces sp. NBC_00496 Streptomyces sp. SID5476 Streptomyces stelliscabiei Streptomyces sp. CA…	18
A0A6I1Z802	Bacteria	Bacillati	Actinomycetota	Actinomycetes	Kitasatosporales	Streptomycetaceae	Streptomyces	Streptomyces broussonetiae Streptomyces puniciscabiei Streptomyces sp. RB17	3
A0AAW8FSM9	Bacteria	Bacillati	Actinomycetota	Actinomycetes	Kitasatosporales	Streptomycetaceae	Streptomyces	Streptomyces canus	1
A0AAI8L7E7	Bacteria	Bacillati	Actinomycetota	Actinomycetes	Kitasatosporales	Streptomycetaceae	Streptomyces	Streptomyces canus Streptomyces griseorubiginosus Streptomyces pseudovenezuelae Streptomyces sp. NBC_00076 Streptomyces sp. NBC_00285 Streptomyces sp. NBC_00663 Streptomyces sp. Root369 Streptomyces sp. SID13726 Streptomyces sp. SLBN-31 Streptomyces sviceus ATCC 29083	10
A0A918ZAQ7	Bacteria	Bacillati	Actinomycetota	Actinomycetes	Kitasatosporales	Streptomycetaceae	Streptomyces	Streptomyces capitiformicae	1
A0A1H5D496	Bacteria	Bacillati	Actinomycetota	Actinomycetes	Kitasatosporales	Streptomycetaceae	Streptomyces	Streptomyces chartreusis Streptomyces sp. PAN_FS17 Streptomyces sp. WAC 01325	3
A0A7M2T786	Bacteria	Bacillati	Actinomycetota	Actinomycetes	Kitasatosporales	Streptomycetaceae	Streptomyces	Streptomyces chromofuscus	1
A0A1Q5KC45	Bacteria	Bacillati	Actinomycetota	Actinomycetes	Kitasatosporales	Streptomycetaceae	Streptomyces	Streptomyces collinus Tu 365 Streptomyces sp. CB01883 Streptomyces sp. PanSC9	3
A0A7X1JAR6	Bacteria	Bacillati	Actinomycetota	Actinomycetes	Kitasatosporales	Streptomycetaceae	Streptomyces	Streptomyces cupreus Streptomyces sp. NBC_00287	2
A0A233SKS6	Bacteria	Bacillati	Actinomycetota	Actinomycetes	Kitasatosporales	Streptomycetaceae	Streptomyces	Streptomyces diastatochromogenes Streptomyces sp. BK340 Streptomyces adustus Streptomyces cyaneochromogenes Streptomyces populi	5
A0A5Q0LLP6	Bacteria	Bacillati	Actinomycetota	Actinomycetes	Kitasatosporales	Streptomycetaceae	Streptomyces	Streptomyces fagopyri Streptomyces sp. Me109	2
A0A7M2SXW1	Bacteria	Bacillati	Actinomycetota	Actinomycetes	Kitasatosporales	Streptomycetaceae	Streptomyces	Streptomyces ferrugineus	1
A0A9Q3VX79	Bacteria	Bacillati	Actinomycetota	Actinomycetes	Kitasatosporales	Streptomycetaceae	Streptomyces	Streptomyces flaveus Streptomyces guryensis Streptomyces sp. Streptomyces sp. Act143 Streptomyces sp. NBC_00005 Streptomyces sp. NBC_00028 Streptomyces sp. R21 Streptomyces sp. S3(2020) Streptomyces sp. WM6386 Streptomyces sp. NBC_00075	10
A0A1H5PL77	Bacteria	Bacillati	Actinomycetota	Actinomycetes	Kitasatosporales	Streptomycetaceae	Streptomyces	Streptomyces fuscichromogenes Streptomyces sp. Ag109_O5-1 Streptomyces sp. Ag109_O5-10 Streptomyces sp. NBC_00631 Streptomyces sp. R39	5
A0A101UHZ2	Bacteria	Bacillati	Actinomycetota	Actinomycetes	Kitasatosporales	Streptomycetaceae	Streptomyces	Streptomyces griseoruber Streptomyces sp. DSM 15324	2
A0A7W0DJT4	Bacteria	Bacillati	Actinomycetota	Actinomycetes	Kitasatosporales	Streptomycetaceae	Streptomyces	Streptomyces himalayensis subsp. aureolus Streptomyces himalayensis subsp. himalayensis Streptomyces jeddahensis	3
L1KQB9	Bacteria	Bacillati	Actinomycetota	Actinomycetes	Kitasatosporales	Streptomycetaceae	Streptomyces	Streptomyces ipomoeae Streptomyces ipomoeae 91-03	2
L7EX56	Bacteria	Bacillati	Actinomycetota	Actinomycetes	Kitasatosporales	Streptomycetaceae	Streptomyces	Streptomyces lacrimifluminis Streptomyces sp. 3213.3 Streptomyces sp. NBC_00079 Streptomyces sp. NBC_00093 Streptomyces sp. NBC_00114 Streptomyces sp. NBC_00180 Streptomyces sp. NBC_00280 Streptomyces sp. NBC_00289 Streptomyces sp. NBC_00299 Streptomyces sp. NBC_00519 Streptomyces sp. NBC_01390 Streptomyces sp. NBC_01451 Streptomyces sp. NRRL WC-3618 Streptomyces sp. R11 Streptomyces sp. R28 Stre…	19
A0A6G9H5B3	Bacteria	Bacillati	Actinomycetota	Actinomycetes	Kitasatosporales	Streptomycetaceae	Streptomyces	Streptomyces liangshanensis Streptomyces sp. SID3212	2
A0A1B1M5Y2	Bacteria	Bacillati	Actinomycetota	Actinomycetes	Kitasatosporales	Streptomycetaceae	Streptomyces	Streptomyces lincolnensis	1
A0A2R4SYY4	Bacteria	Bacillati	Actinomycetota	Actinomycetes	Kitasatosporales	Streptomycetaceae	Streptomyces	Streptomyces lunaelactis	1
A0A1J4NPZ5	Bacteria	Bacillati	Actinomycetota	Actinomycetes	Kitasatosporales	Streptomycetaceae	Streptomyces	Streptomyces mangrovisoli	1
A0A6G4XBF8	Bacteria	Bacillati	Actinomycetota	Actinomycetes	Kitasatosporales	Streptomycetaceae	Streptomyces	Streptomyces mesophilus	1
A0A5N5ZN18	Bacteria	Bacillati	Actinomycetota	Actinomycetes	Kitasatosporales	Streptomycetaceae	Streptomyces	Streptomyces mimosae Streptomyces triticirhizae	2
A0A2A3HAV4	Bacteria	Bacillati	Actinomycetota	Actinomycetes	Kitasatosporales	Streptomycetaceae	Streptomyces	Streptomyces mirabilis Streptomyces olivochromogenes Streptomyces sp. Ag82_O1-15 Streptomyces sp. CGMCC 4.7035 Streptomyces sp. HG99 Streptomyces sp. NBC_00035 Streptomyces sp. NBC_00203 Streptomyces sp. NBC_00271 Streptomyces sp. NBC_00328 Streptomyces sp. NBC_00343 Streptomyces sp. NBC_00500 Streptomyces sp. NBC_00645 Streptomyces sp. NBC_00647 Streptomyces sp. NBC_00658 Streptomyces sp. NBC_00…	31
A0A345HJW5	Bacteria	Bacillati	Actinomycetota	Actinomycetes	Kitasatosporales	Streptomycetaceae	Streptomyces	Streptomyces paludis	1
A0A1H9J0Z9	Bacteria	Bacillati	Actinomycetota	Actinomycetes	Kitasatosporales	Streptomycetaceae	Streptomyces	Streptomyces phaeofaciens Streptomyces sp. Ag109_G2-15 Streptomyces sp. NBC_00267 Streptomyces sp. NBC_01485 Streptomyces sp. yr375 Streptomyces sp. 3214.6	6
A0A0X3V8A3	Bacteria	Bacillati	Actinomycetota	Actinomycetes	Kitasatosporales	Streptomycetaceae	Streptomyces	Streptomyces regalis	1
A0A7H0ILN4	Bacteria	Bacillati	Actinomycetota	Actinomycetes	Kitasatosporales	Streptomycetaceae	Streptomyces	Streptomyces roseirectus	1
A0A3M0IF57	Bacteria	Bacillati	Actinomycetota	Actinomycetes	Kitasatosporales	Streptomycetaceae	Streptomyces	Streptomyces shenzhenensis	1
A0A973UIQ5	Bacteria	Bacillati	Actinomycetota	Actinomycetes	Kitasatosporales	Streptomycetaceae	Streptomyces	Streptomyces sp.	1
A0A1G5K043	Bacteria	Bacillati	Actinomycetota	Actinomycetes	Kitasatosporales	Streptomycetaceae	Streptomyces	Streptomyces sp. 136MFCol5.1 Streptomyces sp. NBC_00055 Streptomyces sp. NBC_00121 Streptomyces sp. NBC_00208 Streptomyces sp. NBC_00316 Streptomyces sp. NBC_00623 Streptomyces sp. NBC_00624	7
A0A1H5IJJ2	Bacteria	Bacillati	Actinomycetota	Actinomycetes	Kitasatosporales	Streptomycetaceae	Streptomyces	Streptomyces sp. 2231.1	1
A0A2S6WQ03	Bacteria	Bacillati	Actinomycetota	Actinomycetes	Kitasatosporales	Streptomycetaceae	Streptomyces	Streptomyces sp. 46	1
A0A4S2U5W4	Bacteria	Bacillati	Actinomycetota	Actinomycetes	Kitasatosporales	Streptomycetaceae	Streptomyces	Streptomyces sp. A0642	1
A0A2M9JRN5	Bacteria	Bacillati	Actinomycetota	Actinomycetes	Kitasatosporales	Streptomycetaceae	Streptomyces	Streptomyces sp. AcE210 Streptomyces sp. CB01635 Streptomyces sp. NBC_00056 Streptomyces sp. NBC_00081 Streptomyces sp. NBC_00118 Streptomyces sp. NBC_00134 Streptomyces sp. NBC_00649	7
A0A1Q5J299	Bacteria	Bacillati	Actinomycetota	Actinomycetes	Kitasatosporales	Streptomycetaceae	Streptomyces	Streptomyces sp. CB02009	1
A0A1Q5J0F3	Bacteria	Bacillati	Actinomycetota	Actinomycetes	Kitasatosporales	Streptomycetaceae	Streptomyces	Streptomyces sp. CB02261	1
A0A2S4YS04	Bacteria	Bacillati	Actinomycetota	Actinomycetes	Kitasatosporales	Streptomycetaceae	Streptomyces	Streptomyces sp. CdTB01 Streptomyces sp. Ru72	2
A0A1C4JCZ4	Bacteria	Bacillati	Actinomycetota	Actinomycetes	Kitasatosporales	Streptomycetaceae	Streptomyces	Streptomyces sp. DvalAA-14	1
A0A5C8QNG5	Bacteria	Bacillati	Actinomycetota	Actinomycetes	Kitasatosporales	Streptomycetaceae	Streptomyces	Streptomyces sp. IB2014 016-6	1
A0A550I4W9	Bacteria	Bacillati	Actinomycetota	Actinomycetes	Kitasatosporales	Streptomycetaceae	Streptomyces	Streptomyces sp. IB201691-2A2 Streptomyces sp. NBC_00258 Streptomyces fructofermentans Streptomyces liliifuscus	4
A0AA96FLR3	Bacteria	Bacillati	Actinomycetota	Actinomycetes	Kitasatosporales	Streptomycetaceae	Streptomyces	Streptomyces sp. Li-HN-5-11	1
A0A1V9K6B2	Bacteria	Bacillati	Actinomycetota	Actinomycetes	Kitasatosporales	Streptomycetaceae	Streptomyces	Streptomyces sp. M41(2017) Streptomyces sp. NBC_00197 Streptomyces sp. NBC_00340	3
A0A370VUN0	Bacteria	Bacillati	Actinomycetota	Actinomycetes	Kitasatosporales	Streptomycetaceae	Streptomyces	Streptomyces sp. M7	1
A0A0M8TFQ7	Bacteria	Bacillati	Actinomycetota	Actinomycetes	Kitasatosporales	Streptomycetaceae	Streptomyces	Streptomyces sp. MMG1533 Streptomyces sp. NL15-2K	2
A0A1C5DSD5	Bacteria	Bacillati	Actinomycetota	Actinomycetes	Kitasatosporales	Streptomycetaceae	Streptomyces	Streptomyces sp. MnatMP-M17	1
A0AAU1ZLR3	Bacteria	Bacillati	Actinomycetota	Actinomycetes	Kitasatosporales	Streptomycetaceae	Streptomyces	Streptomyces sp. NBC_00090	1
A0AAU6H3H6	Bacteria	Bacillati	Actinomycetota	Actinomycetes	Kitasatosporales	Streptomycetaceae	Streptomyces	Streptomyces sp. NBC_00111 Streptomyces sp. NBC_01460	2
A0AAU1NND8	Bacteria	Bacillati	Actinomycetota	Actinomycetes	Kitasatosporales	Streptomycetaceae	Streptomyces	Streptomyces sp. NBC_00117 Streptomyces sp. NBC_00119 Streptomyces sp. NBC_00145 Streptomyces sp. NBC_00147 Streptomyces sp. NBC_00269 Streptomyces sp. NBC_01378 Streptomyces sp. NBC_01386	7
A0AAU1QAI2	Bacteria	Bacillati	Actinomycetota	Actinomycetes	Kitasatosporales	Streptomycetaceae	Streptomyces	Streptomyces sp. NBC_00133 Streptomyces sp. NBC_00210	2
A0AAU5CE36	Bacteria	Bacillati	Actinomycetota	Actinomycetes	Kitasatosporales	Streptomycetaceae	Streptomyces	Streptomyces sp. NBC_00184 Streptomyces sp. NBC_00236 Streptomyces sp. NBC_00656	3
A0AAU5DYT9	Bacteria	Bacillati	Actinomycetota	Actinomycetes	Kitasatosporales	Streptomycetaceae	Streptomyces	Streptomyces sp. NBC_00234	1
A0AAU4YF78	Bacteria	Bacillati	Actinomycetota	Actinomycetes	Kitasatosporales	Streptomycetaceae	Streptomyces	Streptomyces sp. NBC_00259	1
A0A0Q9AIH5	Bacteria	Bacillati	Actinomycetota	Actinomycetes	Kitasatosporales	Streptomycetaceae	Streptomyces	Streptomyces sp. NBC_00425 Streptomyces sp. P3 Streptomyces sp. Root264	3
A0AAU4B2E2	Bacteria	Bacillati	Actinomycetota	Actinomycetes	Kitasatosporales	Streptomycetaceae	Streptomyces	Streptomyces sp. NBC_00433	1
A0AAU5R7R3	Bacteria	Bacillati	Actinomycetota	Actinomycetes	Kitasatosporales	Streptomycetaceae	Streptomyces	Streptomyces sp. NBC_00683	1
A0A652KH78	Bacteria	Bacillati	Actinomycetota	Actinomycetes	Kitasatosporales	Streptomycetaceae	Streptomyces	Streptomyces sp. NBC_01255 Streptomyces sp. Ms191	2
A0AAU5H9K2	Bacteria	Bacillati	Actinomycetota	Actinomycetes	Kitasatosporales	Streptomycetaceae	Streptomyces	Streptomyces sp. NBC_01262	1
A0AAU6FR09	Bacteria	Bacillati	Actinomycetota	Actinomycetes	Kitasatosporales	Streptomycetaceae	Streptomyces	Streptomyces sp. NBC_01463	1
A0AAU6CSX3	Bacteria	Bacillati	Actinomycetota	Actinomycetes	Kitasatosporales	Streptomycetaceae	Streptomyces	Streptomyces sp. NBC_01476	1
A0AAU6CQ79	Bacteria	Bacillati	Actinomycetota	Actinomycetes	Kitasatosporales	Streptomycetaceae	Streptomyces	Streptomyces sp. NBC_01477	1
A0A0X3RUU4	Bacteria	Bacillati	Actinomycetota	Actinomycetes	Kitasatosporales	Streptomycetaceae	Streptomyces	Streptomyces sp. NRRL F-5122	1
A0A0M9ZSQ6	Bacteria	Bacillati	Actinomycetota	Actinomycetes	Kitasatosporales	Streptomycetaceae	Streptomyces	Streptomyces sp. NRRL WC-3723	1
A0A2S4ZTP1	Bacteria	Bacillati	Actinomycetota	Actinomycetes	Kitasatosporales	Streptomycetaceae	Streptomyces	Streptomyces sp. Ru62	1
A0A7K3A0L3	Bacteria	Bacillati	Actinomycetota	Actinomycetes	Kitasatosporales	Streptomycetaceae	Streptomyces	Streptomyces sp. SID8379	1
A0A0J7ZKK9	Bacteria	Bacillati	Actinomycetota	Actinomycetes	Kitasatosporales	Streptomycetaceae	Streptomyces	Streptomyces sp. uw30 Streptomyces viridochromogenes	2
A0A3R9ULC6	Bacteria	Bacillati	Actinomycetota	Actinomycetes	Kitasatosporales	Streptomycetaceae	Streptomyces	Streptomyces sp. WAC01280	1
A0A919DN06	Bacteria	Bacillati	Actinomycetota	Actinomycetes	Kitasatosporales	Streptomycetaceae	Streptomyces	Streptomyces spiralis	1
A0A5P2ALK0	Bacteria	Bacillati	Actinomycetota	Actinomycetes	Kitasatosporales	Streptomycetaceae	Streptomyces	Streptomyces venezuelae	1
A0A1G9Z306	Bacteria	Bacillati	Actinomycetota	Actinomycetes	Kitasatosporales	Streptomycetaceae	Streptomyces	Streptomyces wuyuanensis	1
A0A512DG62	Bacteria	Bacillati	Actinomycetota	Actinomycetes	Micrococcales	Cellulomonadaceae	Cellulomonas	Cellulomonas aerilata	1
A0A401UZB1	Bacteria	Bacillati	Actinomycetota	Actinomycetes	Micrococcales	Cellulomonadaceae	Cellulomonas	Cellulomonas algicola	1
A0A0A0B5R7	Bacteria	Bacillati	Actinomycetota	Actinomycetes	Micrococcales	Cellulomonadaceae	Cellulomonas	Cellulomonas cellasea Cellulomonas cellasea DSM 20118	2
A0A919P8E6	Bacteria	Bacillati	Actinomycetota	Actinomycetes	Micrococcales	Cellulomonadaceae	Cellulomonas	Cellulomonas chitinilytica	1
A0A7Z8JZK5	Bacteria	Bacillati	Actinomycetota	Actinomycetes	Micrococcales	Cellulomonadaceae	Cellulomonas	Cellulomonas hominis	1
A0A0Q5J6U8	Bacteria	Bacillati	Actinomycetota	Actinomycetes	Micrococcales	Cellulomonadaceae	Cellulomonas	Cellulomonas humilata Cellulomonas sp. Leaf334 Cellulomonas sp. Root137 Cellulomonas terrae	4
A0A1I0X7Z9	Bacteria	Bacillati	Actinomycetota	Actinomycetes	Micrococcales	Cellulomonadaceae	Cellulomonas	Cellulomonas marina	1
A0A3N2FNU8	Bacteria	Bacillati	Actinomycetota	Actinomycetes	Micrococcales	Cellulomonadaceae	Cellulomonas	Cellulomonas rhizosphaerae Cellulomonas sp. PhB150	2
A0A4P7SMQ8	Bacteria	Bacillati	Actinomycetota	Actinomycetes	Micrococcales	Cellulomonadaceae	Cellulomonas	Cellulomonas shaoxiangyii	1
A0A6C0FPP3	Bacteria	Bacillati	Actinomycetota	Actinomycetes	Micrococcales	Cellulomonadaceae	Cellulomonas	Cellulomonas sp. H30R-01	1
A0A927FLY1	Bacteria	Bacillati	Actinomycetota	Actinomycetes	Micrococcales	Cellulomonadaceae	Cellulomonas	Cellulomonas sp. JH27-2	1
A0A0Q7MAE7	Bacteria	Bacillati	Actinomycetota	Actinomycetes	Micrococcales	Cellulomonadaceae	Cellulomonas	Cellulomonas sp. Root485	1
A0A7Y9Z7U5	Bacteria	Bacillati	Actinomycetota	Actinomycetes	Micrococcales	Demequinaceae	Demequina	Demequina lutea	1
A0A1Y6F934	Bacteria	Bacillati	Actinomycetota	Actinomycetes	Micrococcales	Microbacteriaceae	Agreia	Agreia bicolorata Agreia pratensis Agreia sp. Leaf210 Agreia sp. VKM Ac-1783	4
A0A0S9DWV8	Bacteria	Bacillati	Actinomycetota	Actinomycetes	Micrococcales	Microbacteriaceae	Agreia	Agreia sp. Leaf244 Agreia sp. Leaf283	2
A0A2S0WVB2	Bacteria	Bacillati	Actinomycetota	Actinomycetes	Micrococcales	Microbacteriaceae	Agromyces	Agromyces badenianii	1
A0A0Q4H9D0	Bacteria	Bacillati	Actinomycetota	Actinomycetes	Micrococcales	Microbacteriaceae	Agromyces	Agromyces sp. Leaf222	1
A0A0Q9J2C3	Bacteria	Bacillati	Actinomycetota	Actinomycetes	Micrococcales	Microbacteriaceae	Agromyces	Agromyces sp. Soil535	1
A0A2V1HSR2	Bacteria	Bacillati	Actinomycetota	Actinomycetes	Micrococcales	Microbacteriaceae	Amnibacterium	Amnibacterium flavum	1
A0A2V1HXJ5	Bacteria	Bacillati	Actinomycetota	Actinomycetes	Micrococcales	Microbacteriaceae	Amnibacterium	Amnibacterium flavum	1
A0A0D5CET5	Bacteria	Bacillati	Actinomycetota	Actinomycetes	Micrococcales	Microbacteriaceae	Clavibacter	Clavibacter michiganensis subsp. insidiosus Clavibacter lycopersici Clavibacter michiganensis Clavibacter michiganensis subsp. michiganensis Clavibacter michiganensis subsp. michiganensis NCP Clavibacter tessellarius Clavibacter zhangzhiyongii	7
A0A841AJ69	Bacteria	Bacillati	Actinomycetota	Actinomycetes	Micrococcales	Microbacteriaceae	Conyzicola	Conyzicola lurida	1
A0A1B1BLH5	Bacteria	Bacillati	Actinomycetota	Actinomycetes	Micrococcales	Microbacteriaceae	Cryobacterium	Cryobacterium arcticum	1
A0A653Q4H4	Bacteria	Bacillati	Actinomycetota	Actinomycetes	Micrococcales	Microbacteriaceae	Curtobacterium	Curtobacterium flaccumfaciens pv. flaccumfaciens Curtobacterium poinsettiae Curtobacterium sp. 8I-2 Curtobacterium sp. KBS0715 Curtobacterium sp. MCBD17_026 Curtobacterium sp. MCLR17_039 Curtobacterium sp. MCSS17_011 Curtobacterium sp. MCSS17_016	8
A0A8H9G9N3	Bacteria	Bacillati	Actinomycetota	Actinomycetes	Micrococcales	Microbacteriaceae	Curtobacterium	Curtobacterium luteum	1
A0A9Q9P9J8	Bacteria	Bacillati	Actinomycetota	Actinomycetes	Micrococcales	Microbacteriaceae	Curtobacterium	Curtobacterium poinsettiae	1
A0A2A5NQX1	Bacteria	Bacillati	Actinomycetota	Actinomycetes	Micrococcales	Microbacteriaceae	Curtobacterium	Curtobacterium sp. 'Ferrero'	1
A0A944PZB7	Bacteria	Bacillati	Actinomycetota	Actinomycetes	Micrococcales	Microbacteriaceae	Curtobacterium	Curtobacterium sp. ISL-83	1
A0AAF0RHR1	Bacteria	Bacillati	Actinomycetota	Actinomycetes	Micrococcales	Microbacteriaceae	Curtobacterium	Curtobacterium sp. MCLR17_007	1
A0A1S2IS05	Bacteria	Bacillati	Actinomycetota	Actinomycetes	Micrococcales	Microbacteriaceae	Curtobacterium	Curtobacterium sp. MMLR14_010	1
A0A3N1K1K6	Bacteria	Bacillati	Actinomycetota	Actinomycetes	Micrococcales	Microbacteriaceae	Curtobacterium	Curtobacterium sp. PhB115	1
A0A4V2VI04	Bacteria	Bacillati	Actinomycetota	Actinomycetes	Micrococcales	Microbacteriaceae	Curtobacterium	Curtobacterium sp. PhB146 Curtobacterium sp. PhB191	2
A0A1H1C447	Bacteria	Bacillati	Actinomycetota	Actinomycetes	Micrococcales	Microbacteriaceae	Curtobacterium	Curtobacterium sp. UNCCL20	1
A0A1I2MSM2	Bacteria	Bacillati	Actinomycetota	Actinomycetes	Micrococcales	Microbacteriaceae	Curtobacterium	Curtobacterium sp. YR515 Curtobacterium sp. ZW137	2
A0A0Q5CB81	Bacteria	Bacillati	Actinomycetota	Actinomycetes	Micrococcales	Microbacteriaceae	Frondihabitans	Frondihabitans sp. Leaf304 Frondihabitans sp. PhB153	2
A0A3N1QPY1	Bacteria	Bacillati	Actinomycetota	Actinomycetes	Micrococcales	Microbacteriaceae	Frondihabitans	Frondihabitans sp. PhB188	1
A0A1H3TII7	Bacteria	Bacillati	Actinomycetota	Actinomycetes	Micrococcales	Microbacteriaceae	Herbiconiux	Herbiconiux ginsengi	1
A0A521MPP7	Bacteria	Bacillati	Actinomycetota	Actinomycetes	Micrococcales	Microbacteriaceae	Herbiconiux	Herbiconiux sp.	1
A0A1I4MYI5	Bacteria	Bacillati	Actinomycetota	Actinomycetes	Micrococcales	Microbacteriaceae	Leifsonia	Leifsonia sp. CL147	1
A0A1V2NLH8	Bacteria	Bacillati	Actinomycetota	Actinomycetes	Micrococcales	Microbacteriaceae	Microbacterium	Microbacterium enclense Microbacterium sp. 5K110 Microbacterium sp. 71-36 Microbacterium sp. CSI-V Microbacterium sp. RURRCA19A Microbacterium sp. T32 Microbacterium testaceum	7
A0A2U0H1I6	Bacteria	Bacillati	Actinomycetota	Actinomycetes	Micrococcales	Microbacteriaceae	Microbacterium	Microbacterium hatanonis Microbacterium sp. AG1240 Microbacterium sp. Gd 4-13	3
A0A5J5IXK9	Bacteria	Bacillati	Actinomycetota	Actinomycetes	Micrococcales	Microbacteriaceae	Microbacterium	Microbacterium rhizomatis	1
A0A0M2HLK4	Bacteria	Bacillati	Actinomycetota	Actinomycetes	Micrococcales	Microbacteriaceae	Microbacterium	Microbacterium sp. Leaf288 Microbacterium trichothecenolyticum	2
A0A939QUF2	Bacteria	Bacillati	Actinomycetota	Actinomycetes	Micrococcales	Microbacteriaceae	Microbacterium	Microbacterium stercoris	1
A0A3L7ATH7	Bacteria	Bacillati	Actinomycetota	Actinomycetes	Micrococcales	Microbacteriaceae	Mycetocola	Mycetocola lacteus	1
A0A0Q5B712	Bacteria	Bacillati	Actinomycetota	Actinomycetes	Micrococcales	Microbacteriaceae	Rathayibacter	Rathayibacter caricis DSM 15933 Rathayibacter rubneri Rathayibacter sp. Leaf296 Rathayibacter sp. Leaf299	4
A0A3Q9UZ46	Bacteria	Bacillati	Actinomycetota	Actinomycetes	Micrococcales	Microbacteriaceae	Rathayibacter	Rathayibacter festucae DSM 15932 Rathayibacter sp. PhB127 Rathayibacter sp. PhB192 Rathayibacter sp. VKM Ac-2760 Rathayibacter sp. VKM Ac-2804	5
A0A1X7PBP6	Bacteria	Bacillati	Actinomycetota	Actinomycetes	Micrococcales	Microbacteriaceae	Rathayibacter	Rathayibacter oskolensis Rathayibacter sp. VKM Ac-2759	2
A0A3E0WAA7	Bacteria	Bacillati	Actinomycetota	Actinomycetes	Micrococcales	Microbacteriaceae	Subtercola	Subtercola boreus	1
A0A3C1DU35	Bacteria	Bacillati	Actinomycetota	Actinomycetes	Micrococcales	Microbacteriaceae	unclassified Microbacteriaceae	Microbacteriaceae bacterium	1
A0A3A5M1Z8	Bacteria	Bacillati	Actinomycetota	Actinomycetes	Micrococcales	Micrococcaceae	Arthrobacter	Arthrobacter cheniae	1
A0A4R5XXZ7	Bacteria	Bacillati	Actinomycetota	Actinomycetes	Micrococcales	Micrococcaceae	Arthrobacter	Arthrobacter nitrophenolicus	1
A0A653UIM7	Bacteria	Bacillati	Actinomycetota	Actinomycetes	Micrococcales	Micrococcaceae	Arthrobacter	Arthrobacter sp. 9AX	1
A0A545BL20	Bacteria	Bacillati	Actinomycetota	Actinomycetes	Micrococcales	Micrococcaceae	Arthrobacter	Arthrobacter sp. 9V Arthrobacter sp. TS-15	2
A0K170	Bacteria	Bacillati	Actinomycetota	Actinomycetes	Micrococcales	Micrococcaceae	Arthrobacter	Arthrobacter sp. FB24	1
A0A944LV04	Bacteria	Bacillati	Actinomycetota	Actinomycetes	Micrococcales	Micrococcaceae	Arthrobacter	Arthrobacter sp. ISL-48	1
A0A554VXP6	Bacteria	Bacillati	Actinomycetota	Actinomycetes	Micrococcales	Micrococcaceae	Arthrobacter	Arthrobacter sp. KBS0703	1
A0A0D1A596	Bacteria	Bacillati	Actinomycetota	Actinomycetes	Micrococcales	Micrococcaceae	Arthrobacter	Arthrobacter sp. Leaf337 Arthrobacter sp. SPG23	2
A0A3T0Y0Z5	Bacteria	Bacillati	Actinomycetota	Actinomycetes	Micrococcales	Micrococcaceae	Arthrobacter	Arthrobacter sp. MN05-02	1
A0A2S9D6P4	Bacteria	Bacillati	Actinomycetota	Actinomycetes	Micrococcales	Micrococcaceae	Arthrobacter	Arthrobacter sp. MYb23	1
A0A4U6N7D3	Bacteria	Bacillati	Actinomycetota	Actinomycetes	Micrococcales	Micrococcaceae	Arthrobacter	Arthrobacter sp. NamB2	1
A0A1H0TVL5	Bacteria	Bacillati	Actinomycetota	Actinomycetes	Micrococcales	Micrococcaceae	Arthrobacter	Arthrobacter sp. Ok909	1
A0A1I7CCX7	Bacteria	Bacillati	Actinomycetota	Actinomycetes	Micrococcales	Micrococcaceae	Arthrobacter	Arthrobacter sp. Ov118	1
A0A1U6I4S7	Bacteria	Bacillati	Actinomycetota	Actinomycetes	Micrococcales	Micrococcaceae	Arthrobacter	Arthrobacter sp. P2b Arthrobacter sp. RT-1	2
A0A345VBZ7	Bacteria	Bacillati	Actinomycetota	Actinomycetes	Micrococcales	Micrococcaceae	Arthrobacter	Arthrobacter sp. PM3	1
A0A542IXE4	Bacteria	Bacillati	Actinomycetota	Actinomycetes	Micrococcales	Micrococcaceae	Arthrobacter	Arthrobacter sp. SLBN-100	1
A0A0Q9NZ97	Bacteria	Bacillati	Actinomycetota	Actinomycetes	Micrococcales	Micrococcaceae	Arthrobacter	Arthrobacter sp. SLBN-112 Arthrobacter sp. SLBN-122 Arthrobacter sp. Soil761 Arthrobacter sp. Soil764	4
A0A0Q9MNR3	Bacteria	Bacillati	Actinomycetota	Actinomycetes	Micrococcales	Micrococcaceae	Arthrobacter	Arthrobacter sp. Soil736	1
A0A5B8KCU3	Bacteria	Bacillati	Actinomycetota	Actinomycetes	Micrococcales	Micrococcaceae	Arthrobacter	Arthrobacter sp. UKPF54-2	1
A0A1G5QVZ3	Bacteria	Bacillati	Actinomycetota	Actinomycetes	Micrococcales	Micrococcaceae	Arthrobacter	Arthrobacter sp. UNCCL28	1
A0A221NEU9	Bacteria	Bacillati	Actinomycetota	Actinomycetes	Micrococcales	Micrococcaceae	Arthrobacter Paenarthrobacter	Arthrobacter sp. YN Paenarthrobacter sp. AMU7 Paenarthrobacter sp. OM7	3
A0A0B4EQ98	Bacteria	Bacillati	Actinomycetota	Actinomycetes	Micrococcales	Micrococcaceae	Arthrobacter Pseudarthrobacter	Arthrobacter sp. 8AJ Arthrobacter sp. SLBN-83 Pseudarthrobacter phenanthrenivorans	3
A0A365D7D5	Bacteria	Bacillati	Actinomycetota	Actinomycetes	Micrococcales	Micrococcaceae	Arthrobacter Pseudarthrobacter	Arthrobacter sp. AG258 Pseudarthrobacter niigatensis Pseudarthrobacter sp. AG30	3
A0A2L0QUB1	Bacteria	Bacillati	Actinomycetota	Actinomycetes	Micrococcales	Micrococcaceae	Arthrobacter Pseudarthrobacter	Arthrobacter sp. BB-1 Arthrobacter sp. PGP41 Pseudarthrobacter sp. GA104 Arthrobacter sp. S39	4
A0A1X7CN12	Bacteria	Bacillati	Actinomycetota	Actinomycetes	Micrococcales	Micrococcaceae	Kocuria	Kocuria marina subsp. Indica	1
A0A4R5YHW8	Bacteria	Bacillati	Actinomycetota	Actinomycetes	Micrococcales	Micrococcaceae	Kocuria	Kocuria rosea	1
A0A1Q9SF36	Bacteria	Bacillati	Actinomycetota	Actinomycetes	Micrococcales	Micrococcaceae	Kocuria	Kocuria sediminis Kocuria sp. CNJ-770 Kocuria sp. SM24M-10 Kocuria turfanensis	4
A0A4Y3NF74	Bacteria	Bacillati	Actinomycetota	Actinomycetes	Micrococcales	Micrococcaceae	Paenarthrobacter	Paenarthrobacter aurescens	1
A1R1A1	Bacteria	Bacillati	Actinomycetota	Actinomycetes	Micrococcales	Micrococcaceae	Paenarthrobacter	Paenarthrobacter aurescens TC1	1
A0AAW8N6X6	Bacteria	Bacillati	Actinomycetota	Actinomycetes	Micrococcales	Micrococcaceae	Pseudarthrobacter	Pseudarthrobacter oxydans	1
F0M7X3	Bacteria	Bacillati	Actinomycetota	Actinomycetes	Micrococcales	Micrococcaceae	Pseudarthrobacter	Pseudarthrobacter phenanthrenivorans Pseudarthrobacter phenanthrenivorans Sphe3	2
A0A024H843	Bacteria	Bacillati	Actinomycetota	Actinomycetes	Micrococcales	Micrococcaceae	Pseudarthrobacter	Pseudarthrobacter siccitolerans	1
A0A7Y5YBN7	Bacteria	Bacillati	Actinomycetota	Actinomycetes	Micrococcales	Micrococcaceae	Pseudarthrobacter	Pseudarthrobacter sp. C4D7	1
A0A5C4J059	Bacteria	Bacillati	Actinomycetota	Actinomycetes	Micrococcales	Micrococcaceae	Pseudarthrobacter	Pseudarthrobacter sp. NamB4 Pseudarthrobacter sp. NamE5	2
A0A5R8WB12	Bacteria	Bacillati	Actinomycetota	Actinomycetes	Micrococcales	Micrococcaceae	Pseudarthrobacter	Pseudarthrobacter sp. NamE2	1
A0A7G6WID0	Bacteria	Bacillati	Actinomycetota	Actinomycetes	Micrococcales	Micrococcaceae	Pseudarthrobacter	Pseudarthrobacter sp. NBSH8	1
A0AA41U7L2	Bacteria	Bacillati	Actinomycetota	Actinomycetes	Micrococcales	Promicromonosporaceae	Antribacter	Antribacter soli	1
A0A2T6L7M9	Bacteria	Bacillati	Actinomycetota	Actinomycetes	Micrococcales	Promicromonosporaceae	Promicromonospora	Promicromonospora soli Promicromonospora sp. AC04	2
A0A117MS91	Bacteria	Bacillati	Actinomycetota	Actinomycetes	Micromonosporales	Micromonosporaceae	Actinoplanes	Actinoplanes awajinensis subsp. Mycoplanecinus	1
A0A7W5FK14	Bacteria	Bacillati	Actinomycetota	Actinomycetes	Micromonosporales	Micromonosporaceae	Actinoplanes	Actinoplanes campanulatus	1
A0A919IPH0	Bacteria	Bacillati	Actinomycetota	Actinomycetes	Micromonosporales	Micromonosporaceae	Actinoplanes	Actinoplanes cyaneus	1
A0A1H1VXG0	Bacteria	Bacillati	Actinomycetota	Actinomycetes	Micromonosporales	Micromonosporaceae	Actinoplanes	Actinoplanes derwentensis	1
A0A7W7HWG4	Bacteria	Bacillati	Actinomycetota	Actinomycetes	Micromonosporales	Micromonosporaceae	Actinoplanes	Actinoplanes digitatis	1
A0A1I2EL72	Bacteria	Bacillati	Actinomycetota	Actinomycetes	Micromonosporales	Micromonosporaceae	Actinoplanes	Actinoplanes italicus Actinoplanes philippinensis	2
A0A7W7HKE4	Bacteria	Bacillati	Actinomycetota	Actinomycetes	Micromonosporales	Micromonosporaceae	Actinoplanes	Actinoplanes lobatus	1
A0A7W7H0I4	Bacteria	Bacillati	Actinomycetota	Actinomycetes	Micromonosporales	Micromonosporaceae	Actinoplanes	Actinoplanes octamycinicus	1
A0A238Z6X6	Bacteria	Bacillati	Actinomycetota	Actinomycetes	Micromonosporales	Micromonosporaceae	Actinoplanes	Actinoplanes regularis	1
G8SKX4	Bacteria	Bacillati	Actinomycetota	Actinomycetes	Micromonosporales	Micromonosporaceae	Actinoplanes	Actinoplanes sp. SE50/110	1
A0A7Y0PGB2	Bacteria	Bacillati	Actinomycetota	Actinomycetes	Micromonosporales	Micromonosporaceae	Actinoplanes	Actinoplanes sp. TBRC 11911	1
A0A8J3NJF4	Bacteria	Bacillati	Actinomycetota	Actinomycetes	Micromonosporales	Micromonosporaceae	Catellatospora	Catellatospora bangladeshensis Catellatospora sp. IY07-71	2
A0A8J3L483	Bacteria	Bacillati	Actinomycetota	Actinomycetes	Micromonosporales	Micromonosporaceae	Catellatospora	Catellatospora coxensis	1
A0A4R4TPD3	Bacteria	Bacillati	Actinomycetota	Actinomycetes	Micromonosporales	Micromonosporaceae	Micromonospora	Micromonospora sp. KC606	1
A0A4V2XBE9	Bacteria	Bacillati	Actinomycetota	Actinomycetes	Micromonosporales	Micromonosporaceae	Micromonospora	Micromonospora sp. KC721	1
A0A4V2XD17	Bacteria	Bacillati	Actinomycetota	Actinomycetes	Micromonosporales	Micromonosporaceae	Micromonospora	Micromonospora sp. KC723	1
A0A7W7G454	Bacteria	Bacillati	Actinomycetota	Actinomycetes	Micromonosporales	Micromonosporaceae	Paractinoplanes	Paractinoplanes abujensis	1
A0A919J5F3	Bacteria	Bacillati	Actinomycetota	Actinomycetes	Micromonosporales	Micromonosporaceae	Paractinoplanes	Paractinoplanes ferrugineus	1
A0A919TW45	Bacteria	Bacillati	Actinomycetota	Actinomycetes	Micromonosporales	Micromonosporaceae	Paractinoplanes	Paractinoplanes tereljensis	1
A0A919WBZ2	Bacteria	Bacillati	Actinomycetota	Actinomycetes	Micromonosporales	Micromonosporaceae	Paractinoplanes	Paractinoplanes toevensis	1
A0A4Q7NQD3	Bacteria	Bacillati	Actinomycetota	Actinomycetes	Motilibacterales	Motilibacteraceae	Motilibacter	Motilibacter rhizosphaerae	1
X5DVF0	Bacteria	Bacillati	Actinomycetota	Actinomycetes	Mycobacteriales	Corynebacteriaceae	Corynebacterium	Corynebacterium glyciniphilum AJ 3170	1
A0A2Z3YSS5	Bacteria	Bacillati	Actinomycetota	Actinomycetes	Mycobacteriales	Corynebacteriaceae	Corynebacterium	Corynebacterium provencense	1
A0A4Y4C3C2	Bacteria	Bacillati	Actinomycetota	Actinomycetes	Mycobacteriales	Corynebacteriaceae	Corynebacterium	Corynebacterium variabile	1
A0A2N6SYV5	Bacteria	Bacillati	Actinomycetota	Actinomycetes	Mycobacteriales	Corynebacteriaceae	Corynebacterium	Corynebacterium xerosis	1
A0A2S1R3Y7	Bacteria	Bacillati	Actinomycetota	Actinomycetes	Mycobacteriales	Dietziaceae	Dietzia	Dietzia cinnamea Dietzia lutea Dietzia sp. oral taxon 368	3
A0A199AX91	Bacteria	Bacillati	Actinomycetota	Actinomycetes	Mycobacteriales	Dietziaceae	Dietzia	Dietzia maris Dietzia sp. 111N12-1 Dietzia sp. IN118	3
A0A022LPR9	Bacteria	Bacillati	Actinomycetota	Actinomycetes	Mycobacteriales	Dietziaceae	Dietzia	Dietzia natronolimnaea Dietzia sp. DQ12-45-1b Dietzia sp. UCD-THP	3
A0AAD0JQ15	Bacteria	Bacillati	Actinomycetota	Actinomycetes	Mycobacteriales	Dietziaceae	Dietzia	Dietzia psychralcaliphila	1
A0A7J5X2P1	Bacteria	Bacillati	Actinomycetota	Actinomycetes	Mycobacteriales	Gordoniaceae	Gordonia	Gordonia alkanivorans CGMCC 6845 Gordonia alkanivorans NBRC 16433 Gordonia amicalis Gordonia namibiensis NBRC 108229 Gordonia rubripertincta Gordonia sp. 135 Gordonia sp. YY1 Gordonia westfalica	8
A0A857MAU4	Bacteria	Bacillati	Actinomycetota	Actinomycetes	Mycobacteriales	Gordoniaceae	Gordonia	Gordonia amarae Gordonia amarae NBRC 15530	2
A0A9X3D5I1	Bacteria	Bacillati	Actinomycetota	Actinomycetes	Mycobacteriales	Gordoniaceae	Gordonia	Gordonia aquimaris Gordonia mangrovi	2
G7H3J7	Bacteria	Bacillati	Actinomycetota	Actinomycetes	Mycobacteriales	Gordoniaceae	Gordonia	Gordonia araii NBRC 100433	1
A0A848KVS9	Bacteria	Bacillati	Actinomycetota	Actinomycetes	Mycobacteriales	Gordoniaceae	Gordonia	Gordonia asplenii	1
D0L3R5	Bacteria	Bacillati	Actinomycetota	Actinomycetes	Mycobacteriales	Gordoniaceae	Gordonia	Gordonia bronchialis DSM 43247	1
A0A7K3LRM7	Bacteria	Bacillati	Actinomycetota	Actinomycetes	Mycobacteriales	Gordoniaceae	Gordonia	Gordonia desulfuricans	1
J9RQT3	Bacteria	Bacillati	Actinomycetota	Actinomycetes	Mycobacteriales	Gordoniaceae	Gordonia	Gordonia hongkongensis Gordonia lacunae Gordonia sp. AC31 Gordonia sp. KTR9 Gordonia terrae Gordonia terrae C-6	6
A0A3G8JU25	Bacteria	Bacillati	Actinomycetota	Actinomycetes	Mycobacteriales	Gordoniaceae	Gordonia	Gordonia insulae	1
A0A7D7QG59	Bacteria	Bacillati	Actinomycetota	Actinomycetes	Mycobacteriales	Gordoniaceae	Gordonia	Gordonia jinghuaiqii	1
A0A916T272	Bacteria	Bacillati	Actinomycetota	Actinomycetes	Mycobacteriales	Gordoniaceae	Gordonia	Gordonia jinhuaensis	1
A0A1V4QAT3	Bacteria	Bacillati	Actinomycetota	Actinomycetes	Mycobacteriales	Gordoniaceae	Gordonia	Gordonia oryzae Gordonia polyisoprenivorans Gordonia polyisoprenivorans VH2 Gordonia sp. I37	4
H5TGS5	Bacteria	Bacillati	Actinomycetota	Actinomycetes	Mycobacteriales	Gordoniaceae	Gordonia	Gordonia otitidis NBRC 100426 Gordonia aichiensis NBRC 108223	2
A0ABD7V201	Bacteria	Bacillati	Actinomycetota	Actinomycetes	Mycobacteriales	Gordoniaceae	Gordonia	Gordonia paraffinivorans	1
K6UZQ7	Bacteria	Bacillati	Actinomycetota	Actinomycetes	Mycobacteriales	Gordoniaceae	Gordonia	Gordonia rhizosphera NBRC 16068	1
M0QGX5	Bacteria	Bacillati	Actinomycetota	Actinomycetes	Mycobacteriales	Gordoniaceae	Gordonia	Gordonia soli NBRC 108243	1
A0A961HGM9	Bacteria	Bacillati	Actinomycetota	Actinomycetes	Mycobacteriales	Gordoniaceae	Gordonia	Gordonia sp. (in: high G+C Gram-positive bacteria)	1
A0A1A0X3D5	Bacteria	Bacillati	Actinomycetota	Actinomycetes	Mycobacteriales	Gordoniaceae	Gordonia	Gordonia sp. 852002-10350_SCH5691597 Gordonia sp. 852002-50816_SCH5313054-a Gordonia sp. 852002-51296_SCH5728562-b Gordonia sputi NBRC 100414	4
A0A7K2HXR4	Bacteria	Bacillati	Actinomycetota	Actinomycetes	Mycobacteriales	Gordoniaceae	Gordonia	Gordonia sp. SID5947	1
A0AA45G5L9	Bacteria	Bacillati	Actinomycetota	Actinomycetes	Mycobacteriales	Gordoniaceae	Gordonia	Gordonia sp. X0973	1
A0A1H2LP71	Bacteria	Bacillati	Actinomycetota	Actinomycetes	Mycobacteriales	Gordoniaceae	Gordonia	Gordonia westfalica	1
A0A554V3T0	Bacteria	Bacillati	Actinomycetota	Actinomycetes	Mycobacteriales	Gordoniaceae	Skermania	Skermania sp. ID1734	1
A0A839RQP1	Bacteria	Bacillati	Actinomycetota	Actinomycetes	Mycobacteriales	Hoyosellaceae	Hoyosella	Hoyosella altamirensis Hoyosella subflava DQS3-9A1	2
A0A916U377	Bacteria	Bacillati	Actinomycetota	Actinomycetes	Mycobacteriales	Hoyosellaceae	Hoyosella	Hoyosella rhizosphaerae	1
A0A927PJN2	Bacteria	Bacillati	Actinomycetota	Actinomycetes	Mycobacteriales	Hoyosellaceae	Lolliginicoccus	Lolliginicoccus lacisalsi	1
A0A172URT2	Bacteria	Bacillati	Actinomycetota	Actinomycetes	Mycobacteriales	Mycobacteriaceae	Mycobacterium	Mycobacterium adipatum	1
A0A1A3CC30	Bacteria	Bacillati	Actinomycetota	Actinomycetes	Mycobacteriales	Mycobacteriaceae	Mycobacterium	Mycobacterium asiaticum	1
A0AA37PR64	Bacteria	Bacillati	Actinomycetota	Actinomycetes	Mycobacteriales	Mycobacteriaceae	Mycobacterium	Mycobacterium montefiorense	1
A0A1A2ZDR4	Bacteria	Bacillati	Actinomycetota	Actinomycetes	Mycobacteriales	Mycobacteriaceae	Mycobacterium	Mycobacterium palustre Mycobacterium saskatchewanense Mycobacterium sp. E796	3
A0A932IRI4	Bacteria	Bacillati	Actinomycetota	Actinomycetes	Mycobacteriales	Mycobacteriaceae	Mycobacterium	Mycobacterium sp.	1
A0A1A0TRK5	Bacteria	Bacillati	Actinomycetota	Actinomycetes	Mycobacteriales	Mycobacteriaceae	Mycobacterium	Mycobacterium sp. 852013-51886_SCH5428379	1
A0A1A1YLX7	Bacteria	Bacillati	Actinomycetota	Actinomycetes	Mycobacteriales	Mycobacteriaceae	Mycobacterium	Mycobacterium sp. ACS1612	1
A0A7W8CPS7	Bacteria	Bacillati	Actinomycetota	Actinomycetes	Mycobacteriales	Mycobacteriaceae	Mycobacterium	Mycobacterium sp. AZCC_0083	1
L0J1R8	Bacteria	Bacillati	Actinomycetota	Actinomycetes	Mycobacteriales	Mycobacteriaceae	Mycobacterium	Mycobacterium sp. JS623	1
A0A1P8XES1	Bacteria	Bacillati	Actinomycetota	Actinomycetes	Mycobacteriales	Mycobacteriaceae	Mycobacterium	Mycobacterium sp. MS1601	1
F5YXM5	Bacteria	Bacillati	Actinomycetota	Actinomycetes	Mycobacteriales	Mycobacteriaceae	Mycobacterium Mycolicibacter	Mycobacterium novum Mycolicibacter algericus Mycolicibacter sinensis	3
A0A0T1WLP3	Bacteria	Bacillati	Actinomycetota	Actinomycetes	Mycobacteriales	Mycobacteriaceae	Mycobacterium Mycolicibacterium	Mycobacterium sp. AT1 Mycobacterium sp. Root135 Mycobacterium yunnanensis Mycolicibacterium hodleri Mycolicibacterium sp. P1-18	5
A0A117JQP6	Bacteria	Bacillati	Actinomycetota	Actinomycetes	Mycobacteriales	Mycobacteriaceae	Mycobacterium Mycolicibacterium	Mycobacterium sp. GA-2829 Mycobacterium sp. JLS Mycobacterium sp. KMS Mycobacterium sp. MCS Mycolicibacterium litorale Mycolicibacterium monacense	6
A0A6H0SBY4	Bacteria	Bacillati	Actinomycetota	Actinomycetes	Mycobacteriales	Mycobacteriaceae	Mycobacterium Mycolicibacterium	Mycobacterium sp. ITM-2016-00316 Mycobacterium sp. Root265 Mycolicibacterium frederiksbergense Mycolicibacterium sp. P9-22	4
A0A2C9SVZ1	Bacteria	Bacillati	Actinomycetota	Actinomycetes	Mycobacteriales	Mycobacteriaceae	Mycobacterium Mycolicibacterium	Mycobacterium sp. shizuoka-1 Mycolicibacterium aichiense Mycolicibacterium rhodesiae Mycolicibacterium sarraceniae Mycolicibacterium sphagni Mycolicibacterium helvum uncultured Mycobacterium sp.	7
A0A0D1L6A9	Bacteria	Bacillati	Actinomycetota	Actinomycetes	Mycobacteriales	Mycobacteriaceae	Mycobacterium Mycolicibacterium	Mycobacterium sp. Mycolicibacterium llatzerense Mycolicibacterium mucogenicum Mycolicibacterium mucogenicum DSM 44124 Mycolicibacterium phocaicum Mycolicibacterium sp. Mycolicibacterium sp. CBMA 226 Mycolicibacterium sp. CBMA 360 Mycolicibacterium sp. NCC-Tsukiji	9
A0A4R8S929	Bacteria	Bacillati	Actinomycetota	Actinomycetes	Mycobacteriales	Mycobacteriaceae	Mycobacteroides	Mycobacteroides chelonae Mycobacteroides salmoniphilum Mycobacteroides saopaulense Mycobacteroides sp. H001 Mycobacteroides sp. H002 Mycobacteroides sp. H054 Mycobacteroides sp. H072 Mycobacteroides sp. H092 [Mycobacterium] stephanolepidis Mycobacteroides abscessus Mycobacteroides abscessus 1948 Mycobacteroides abscessus 21 Mycobacteroides abscessus ATCC 19977 Mycobacteroides abscessus MAB_030201…	23
A0A7V8LP61	Bacteria	Bacillati	Actinomycetota	Actinomycetes	Mycobacteriales	Mycobacteriaceae	Mycobacteroides	Mycobacteroides immunogenum	1
A0A7K1JSG0	Bacteria	Bacillati	Actinomycetota	Actinomycetes	Mycobacteriales	Mycobacteriaceae	Mycobacteroides	Mycobacteroides sp. CBMA 271	1
A0A1X1T521	Bacteria	Bacillati	Actinomycetota	Actinomycetes	Mycobacteriales	Mycobacteriaceae	Mycolicibacter	Mycolicibacter engbaekii Mycolicibacter hiberniae	2
A0A9X7WEH0	Bacteria	Bacillati	Actinomycetota	Actinomycetes	Mycobacteriales	Mycobacteriaceae	Mycolicibacter	Mycolicibacter heraklionensis Mycolicibacter virginiensis	2
A0A7K3L8Z7	Bacteria	Bacillati	Actinomycetota	Actinomycetes	Mycobacteriales	Mycobacteriaceae	Mycolicibacter	Mycolicibacter kumamotonensis	1
A0A1B8SH45	Bacteria	Bacillati	Actinomycetota	Actinomycetes	Mycobacteriales	Mycobacteriaceae	Mycolicibacter	Mycolicibacter kumamotonensis Mycolicibacter sinensis	2
A0A1X1Y888	Bacteria	Bacillati	Actinomycetota	Actinomycetes	Mycobacteriales	Mycobacteriaceae	Mycolicibacter	Mycolicibacter longobardus	1
A0A7I7R2F7	Bacteria	Bacillati	Actinomycetota	Actinomycetes	Mycobacteriales	Mycobacteriaceae	Mycolicibacter	Mycolicibacter minnesotensis	1
A0A7I9XGQ0	Bacteria	Bacillati	Actinomycetota	Actinomycetes	Mycobacteriales	Mycobacteriaceae	Mycolicibacter	Mycolicibacter senuensis	1
A0A1A3TZM6	Bacteria	Bacillati	Actinomycetota	Actinomycetes	Mycobacteriales	Mycobacteriaceae	Mycolicibacter	Mycolicibacter sinensis	1
A0A1A2XXE8	Bacteria	Bacillati	Actinomycetota	Actinomycetes	Mycobacteriales	Mycobacteriaceae	Mycolicibacter	Mycolicibacter sinensis	1
A0AAD1HVP5	Bacteria	Bacillati	Actinomycetota	Actinomycetes	Mycobacteriales	Mycobacteriaceae	Mycolicibacter	Mycolicibacter terrae	1
A0A6N4W751	Bacteria	Bacillati	Actinomycetota	Actinomycetes	Mycobacteriales	Mycobacteriaceae	Mycolicibacterium	Mycolicibacterium anyangense	1
A0A7I7RVF4	Bacteria	Bacillati	Actinomycetota	Actinomycetes	Mycobacteriales	Mycobacteriaceae	Mycolicibacterium	Mycolicibacterium arabiense	1
A0A1W9YTU9	Bacteria	Bacillati	Actinomycetota	Actinomycetes	Mycobacteriales	Mycobacteriaceae	Mycolicibacterium	Mycolicibacterium bacteremicum	1
W9AVA0	Bacteria	Bacillati	Actinomycetota	Actinomycetes	Mycobacteriales	Mycobacteriaceae	Mycolicibacterium	Mycolicibacterium canariasense Mycolicibacterium cosmeticum	2
A0A7I7XW84	Bacteria	Bacillati	Actinomycetota	Actinomycetes	Mycobacteriales	Mycobacteriaceae	Mycolicibacterium	Mycolicibacterium confluentis	1
A0A2A7NZJ1	Bacteria	Bacillati	Actinomycetota	Actinomycetes	Mycobacteriales	Mycobacteriaceae	Mycolicibacterium	Mycolicibacterium diernhoferi	1
A0A1X1TG48	Bacteria	Bacillati	Actinomycetota	Actinomycetes	Mycobacteriales	Mycobacteriaceae	Mycolicibacterium	Mycolicibacterium doricum	1
A0A439DLM5	Bacteria	Bacillati	Actinomycetota	Actinomycetes	Mycobacteriales	Mycobacteriaceae	Mycolicibacterium	Mycolicibacterium elephantis Mycolicibacterium elephantis DSM 44368	2
A0A1G4VAR2	Bacteria	Bacillati	Actinomycetota	Actinomycetes	Mycobacteriales	Mycobacteriaceae	Mycolicibacterium	Mycolicibacterium fluoranthenivorans	1
K5BEK9	Bacteria	Bacillati	Actinomycetota	Actinomycetes	Mycobacteriales	Mycobacteriaceae	Mycolicibacterium	Mycolicibacterium hassiacum DSM 44199	1
A0A502EI41	Bacteria	Bacillati	Actinomycetota	Actinomycetes	Mycobacteriales	Mycobacteriaceae	Mycolicibacterium	Mycolicibacterium hodleri	1
A0A7I7XEW3	Bacteria	Bacillati	Actinomycetota	Actinomycetes	Mycobacteriales	Mycobacteriaceae	Mycolicibacterium	Mycolicibacterium madagascariense	1
A0A318HJD5	Bacteria	Bacillati	Actinomycetota	Actinomycetes	Mycobacteriales	Mycobacteriaceae	Mycolicibacterium	Mycolicibacterium moriokaense	1
A0A378TNR8	Bacteria	Bacillati	Actinomycetota	Actinomycetes	Mycobacteriales	Mycobacteriaceae	Mycolicibacterium	Mycolicibacterium murale Mycolicibacterium tokaiense	2
V5XBH4	Bacteria	Bacillati	Actinomycetota	Actinomycetes	Mycobacteriales	Mycobacteriaceae	Mycolicibacterium	Mycolicibacterium neoaurum Mycolicibacterium neoaurum VKM Ac-1815D	2
A0A7I7QSW3	Bacteria	Bacillati	Actinomycetota	Actinomycetes	Mycobacteriales	Mycobacteriaceae	Mycolicibacterium	Mycolicibacterium sediminis	1
A0QUG1	Bacteria	Bacillati	Actinomycetota	Actinomycetes	Mycobacteriales	Mycobacteriaceae	Mycolicibacterium	Mycolicibacterium smegmatis MC2 155	1
A0A4Z0NDA0	Bacteria	Bacillati	Actinomycetota	Actinomycetes	Mycobacteriales	Mycobacteriaceae	Mycolicibacterium	Mycolicibacterium sp. CH28	1
A0A5A7WSY3	Bacteria	Bacillati	Actinomycetota	Actinomycetes	Mycobacteriales	Mycobacteriaceae	Mycolicibacterium	Mycolicibacterium sp. P9-64	1
A0AA37RTE9	Bacteria	Bacillati	Actinomycetota	Actinomycetes	Mycobacteriales	Mycobacteriaceae	Mycolicibacterium	Mycolicibacterium sp. TUM20983	1
G7CLK7	Bacteria	Bacillati	Actinomycetota	Actinomycetes	Mycobacteriales	Mycobacteriaceae	Mycolicibacterium	Mycolicibacterium thermoresistibile Mycolicibacterium thermoresistibile ATCC 19527	2
K0V7N9	Bacteria	Bacillati	Actinomycetota	Actinomycetes	Mycobacteriales	Mycobacteriaceae	Mycolicibacterium	Mycolicibacterium vaccae ATCC 25954	1
A0A934UC82	Bacteria	Bacillati	Actinomycetota	Actinomycetes	Mycobacteriales	Nocardiaceae	Antrihabitans	Antrihabitans sp. YC2-6	1
A0A848KIF7	Bacteria	Bacillati	Actinomycetota	Actinomycetes	Mycobacteriales	Nocardiaceae	Antrihabitans	Antrihabitans stalactiti	1
A0A378WNB2	Bacteria	Bacillati	Actinomycetota	Actinomycetes	Mycobacteriales	Nocardiaceae	Nocardia	Nocardia africana Nocardia cerradoensis Nocardia nova Nocardia sp. 852002-20019_SCH5090214 Nocardia sp. MDA0666	5
A0A4R1FY72	Bacteria	Bacillati	Actinomycetota	Actinomycetes	Mycobacteriales	Nocardiaceae	Nocardia	Nocardia alba Nocardia fluminea	2
A0A285L9D5	Bacteria	Bacillati	Actinomycetota	Actinomycetes	Mycobacteriales	Nocardiaceae	Nocardia	Nocardia amikacinitolerans Nocardia bhagyanarayanae	2
U5EBL9	Bacteria	Bacillati	Actinomycetota	Actinomycetes	Mycobacteriales	Nocardiaceae	Nocardia	Nocardia asteroides NBRC 15531	1
A0A7K0DVA5	Bacteria	Bacillati	Actinomycetota	Actinomycetes	Mycobacteriales	Nocardiaceae	Nocardia	Nocardia aurantia	1
A0A6I3L4Y5	Bacteria	Bacillati	Actinomycetota	Actinomycetes	Mycobacteriales	Nocardiaceae	Nocardia	Nocardia aurantiaca	1
A0A931I8F4	Bacteria	Bacillati	Actinomycetota	Actinomycetes	Mycobacteriales	Nocardiaceae	Nocardia	Nocardia bovistercoris	1
K0EZW8	Bacteria	Bacillati	Actinomycetota	Actinomycetes	Mycobacteriales	Nocardiaceae	Nocardia	Nocardia brasiliensis ATCC 700358	1
A0A917QGQ6	Bacteria	Bacillati	Actinomycetota	Actinomycetes	Mycobacteriales	Nocardiaceae	Nocardia	Nocardia camponoti	1
A0A4V1BFX1	Bacteria	Bacillati	Actinomycetota	Actinomycetes	Mycobacteriales	Nocardiaceae	Nocardia	Nocardia colli Nocardia ninae NBRC 108245 Nocardia sp. CS682	3
A0A846WFC4	Bacteria	Bacillati	Actinomycetota	Actinomycetes	Mycobacteriales	Nocardiaceae	Nocardia	Nocardia coubleae Nocardia ignorata	2
A0A4U8WBK4	Bacteria	Bacillati	Actinomycetota	Actinomycetes	Mycobacteriales	Nocardiaceae	Nocardia	Nocardia cyriacigeorgica	1
A0A0H5P1Z5	Bacteria	Bacillati	Actinomycetota	Actinomycetes	Mycobacteriales	Nocardiaceae	Nocardia	Nocardia farcinica Nocardia farcinica IFM 10152 Nocardia sp. FDAARGOS_372	3
A0A7X6R1W2	Bacteria	Bacillati	Actinomycetota	Actinomycetes	Mycobacteriales	Nocardiaceae	Nocardia	Nocardia gamkensis	1
A0A7D6Z497	Bacteria	Bacillati	Actinomycetota	Actinomycetes	Mycobacteriales	Nocardiaceae	Nocardia	Nocardia huaxiensis	1
A0A917VQ21	Bacteria	Bacillati	Actinomycetota	Actinomycetes	Mycobacteriales	Nocardiaceae	Nocardia	Nocardia jinanensis	1
A0A7K0DBQ2	Bacteria	Bacillati	Actinomycetota	Actinomycetes	Mycobacteriales	Nocardiaceae	Nocardia	Nocardia macrotermitis	1
A0A1J0VYU8	Bacteria	Bacillati	Actinomycetota	Actinomycetes	Mycobacteriales	Nocardiaceae	Nocardia	Nocardia mangyaensis	1
A0A370H5X9	Bacteria	Bacillati	Actinomycetota	Actinomycetes	Mycobacteriales	Nocardiaceae	Nocardia	Nocardia mexicana	1
A0A317N9Z5	Bacteria	Bacillati	Actinomycetota	Actinomycetes	Mycobacteriales	Nocardiaceae	Nocardia	Nocardia neocaledoniensis	1
W5T9X5	Bacteria	Bacillati	Actinomycetota	Actinomycetes	Mycobacteriales	Nocardiaceae	Nocardia	Nocardia nova SH22a	1
A0A378Y9S6	Bacteria	Bacillati	Actinomycetota	Actinomycetes	Mycobacteriales	Nocardiaceae	Nocardia	Nocardia otitidiscaviarum	1
A0A370I7B2	Bacteria	Bacillati	Actinomycetota	Actinomycetes	Mycobacteriales	Nocardiaceae	Nocardia	Nocardia pseudobrasiliensis	1
A0A9X2IXY5	Bacteria	Bacillati	Actinomycetota	Actinomycetes	Mycobacteriales	Nocardiaceae	Nocardia	Nocardia pulmonis	1
A0A366D3F7	Bacteria	Bacillati	Actinomycetota	Actinomycetes	Mycobacteriales	Nocardiaceae	Nocardia	Nocardia puris	1
A0A7K1V8I1	Bacteria	Bacillati	Actinomycetota	Actinomycetes	Mycobacteriales	Nocardiaceae	Nocardia	Nocardia seriolae Nocardia terrae	2
A0AAU3UE77	Bacteria	Bacillati	Actinomycetota	Actinomycetes	Mycobacteriales	Nocardiaceae	Nocardia	Nocardia sp. NBC_00511	1
A0AAU3PRT3	Bacteria	Bacillati	Actinomycetota	Actinomycetes	Mycobacteriales	Nocardiaceae	Nocardia	Nocardia sp. NBC_01377	1
A0AAU3KLP2	Bacteria	Bacillati	Actinomycetota	Actinomycetes	Mycobacteriales	Nocardiaceae	Nocardia	Nocardia sp. NBC_01388	1
A0A0Q7NVU7	Bacteria	Bacillati	Actinomycetota	Actinomycetes	Mycobacteriales	Nocardiaceae	Nocardia	Nocardia sp. Root136	1
A0A6I2FNS5	Bacteria	Bacillati	Actinomycetota	Actinomycetes	Mycobacteriales	Nocardiaceae	Nocardia	Nocardia sp. SYP-A9097	1
A0A3M2L240	Bacteria	Bacillati	Actinomycetota	Actinomycetes	Mycobacteriales	Nocardiaceae	Nocardia	Nocardia stercoris	1
A0A318K5Y2	Bacteria	Bacillati	Actinomycetota	Actinomycetes	Mycobacteriales	Nocardiaceae	Nocardia	Nocardia tenerifensis	1
A0A7W9PEI8	Bacteria	Bacillati	Actinomycetota	Actinomycetes	Mycobacteriales	Nocardiaceae	Nocardia	Nocardia transvalensis	1
A0A849BVJ5	Bacteria	Bacillati	Actinomycetota	Actinomycetes	Mycobacteriales	Nocardiaceae	Nocardia	Nocardia uniformis	1
A0A7G1KUM9	Bacteria	Bacillati	Actinomycetota	Actinomycetes	Mycobacteriales	Nocardiaceae	Nocardia	Nocardia wallacei	1
A0A386Z7J5	Bacteria	Bacillati	Actinomycetota	Actinomycetes	Mycobacteriales	Nocardiaceae	Nocardia	Nocardia yunnanensis	1
A0A0D8HZL5	Bacteria	Bacillati	Actinomycetota	Actinomycetes	Mycobacteriales	Nocardiaceae	Nocardia Rhodococcus	Nocardia globerula Rhodococcus sp. AD45	2
A0A3S3BR10	Bacteria	Bacillati	Actinomycetota	Actinomycetes	Mycobacteriales	Nocardiaceae	Prescottella	Prescottella agglutinans	1
E9SVS7	Bacteria	Bacillati	Actinomycetota	Actinomycetes	Mycobacteriales	Nocardiaceae	Prescottella	Prescottella equi Prescottella equi 103S Prescottella equi ATCC 33707	3
A0A239KJJ8	Bacteria	Bacillati	Actinomycetota	Actinomycetes	Mycobacteriales	Nocardiaceae	Rhodococcoides	Rhodococcoides kyotonense	1
A0A917FWA1	Bacteria	Bacillati	Actinomycetota	Actinomycetes	Mycobacteriales	Nocardiaceae	Rhodococcoides	Rhodococcoides trifolii	1
A0A143QIL9	Bacteria	Bacillati	Actinomycetota	Actinomycetes	Mycobacteriales	Nocardiaceae	Rhodococcoides Rhodococcus	Rhodococcoides fascians Rhodococcus sp. (in: high G+C Gram-positive bacter Rhodococcus sp. 02-925g Rhodococcus sp. 05-2254-4 Rhodococcus sp. 06-221-2 Rhodococcus sp. 06-235-1A Rhodococcus sp. 06-412-2C Rhodococcus sp. 06-469-3-2 Rhodococcus sp. 15-649-2-2 Rhodococcus sp. 1R11 Rhodococcus sp. Leaf278 Rhodococcus sp. 14-2483-1-2 Rhodococcus sp. 15-2388-1-1a	13
A0A426R2U9	Bacteria	Bacillati	Actinomycetota	Actinomycetes	Mycobacteriales	Nocardiaceae	Rhodococcoides_x000D_Rhodococcus	Rhodococcoides kyotonense Rhodococcus sp. Eu-32	2
A0AA46SBG5	Bacteria	Bacillati	Actinomycetota	Actinomycetes	Mycobacteriales	Nocardiaceae	Rhodococcus	Rhodococcus aetherivorans Rhodococcus sp. DMU1 Rhodococcus rhodochrous KG-21 Rhodococcus ruber Rhodococcus ruber BKS 20-38 Rhodococcus sp. AH-ZY2	6
A0A2X4TUE8	Bacteria	Bacillati	Actinomycetota	Actinomycetes	Mycobacteriales	Nocardiaceae	Rhodococcus	Rhodococcus coprophilus	1
A0A2A5JC05	Bacteria	Bacillati	Actinomycetota	Actinomycetes	Mycobacteriales	Nocardiaceae	Rhodococcus	Rhodococcus erythropolis Rhodococcus qingshengii Rhodococcus erythropolis PR4 Rhodococcus qingshengii JCM 15477	4
A0A379LVP0	Bacteria	Bacillati	Actinomycetota	Actinomycetes	Mycobacteriales	Nocardiaceae	Rhodococcus	Rhodococcus gordoniae	1
A0A6N7CHL0	Bacteria	Bacillati	Actinomycetota	Actinomycetes	Mycobacteriales	Nocardiaceae	Rhodococcus	Rhodococcus jostii RHA1 Rhodococcus koreensis Rhodococcus opacus Rhodococcus sp. 4CII Rhodococcus sp. ACPA1 Rhodococcus sp. LB1 Rhodococcus sp. NCIMB 12038 Rhodococcus sp. T7 Rhodococcus sp. WB9 Rhodococcus wratislaviensis Rhodococcus wratislaviensis NBRC 100605	11
A0A1H4SIC4	Bacteria	Bacillati	Actinomycetota	Actinomycetes	Mycobacteriales	Nocardiaceae	Rhodococcus	Rhodococcus jostii Rhodococcus sp. (in: high G+C Gram-positive bacter	2
A0A1P8YA02	Bacteria	Bacillati	Actinomycetota	Actinomycetes	Mycobacteriales	Nocardiaceae	Rhodococcus	Rhodococcus maanshanensis Rhodococcus sp. MTM3W5.2 Rhodococcus sp. PvR099	3
C1B4E5	Bacteria	Bacillati	Actinomycetota	Actinomycetes	Mycobacteriales	Nocardiaceae	Rhodococcus	Rhodococcus opacus B4 Rhodococcus sp. ACS1 Rhodococcus wratislaviensis	3
I0WP25	Bacteria	Bacillati	Actinomycetota	Actinomycetes	Mycobacteriales	Nocardiaceae	Rhodococcus	Rhodococcus opacus M213 Rhodococcus opacus RKJ300 = JCM 13270	2
A0A6P1I3G4	Bacteria	Bacillati	Actinomycetota	Actinomycetes	Mycobacteriales	Nocardiaceae	Rhodococcus	Rhodococcus oxybenzonivorans Rhodococcus sp. WAY2	2
A0A562E6G5	Bacteria	Bacillati	Actinomycetota	Actinomycetes	Mycobacteriales	Nocardiaceae	Rhodococcus	Rhodococcus pyridinivorans Rhodococcus pyridinivorans AK37 Rhodococcus rhodochrous Rhodococcus rhodochrous J45 Rhodococcus sp. D-6 Rhodococcus sp. PAE-6	6
R7WMU4	Bacteria	Bacillati	Actinomycetota	Actinomycetes	Mycobacteriales	Nocardiaceae	Rhodococcus	Rhodococcus rhodnii Rhodococcus rhodnii LMG 5362	2
A0A7X7PCZ2	Bacteria	Bacillati	Actinomycetota	Actinomycetes	Mycobacteriales	Nocardiaceae	Rhodococcus	Rhodococcus sp. (in: high G+C Gram-positive bacter	1
A0A1X0URY0	Bacteria	Bacillati	Actinomycetota	Actinomycetes	Mycobacteriales	Nocardiaceae	Rhodococcus	Rhodococcus sp. 1163 Rhodococcus sp. 1168 Rhodococcus sp. PAMC28705	3
A0A260WLP1	Bacteria	Bacillati	Actinomycetota	Actinomycetes	Mycobacteriales	Nocardiaceae	Rhodococcus	Rhodococcus sp. 14-2470-1a	1
A0A4P6UFG2	Bacteria	Bacillati	Actinomycetota	Actinomycetes	Mycobacteriales	Nocardiaceae	Rhodococcus	Rhodococcus sp. ABRD24	1
A0A370FAY3	Bacteria	Bacillati	Actinomycetota	Actinomycetes	Mycobacteriales	Nocardiaceae	Rhodococcus	Rhodococcus sp. AG1013	1
L8DH26	Bacteria	Bacillati	Actinomycetota	Actinomycetes	Mycobacteriales	Nocardiaceae	Rhodococcus	Rhodococcus sp. AW25M09	1
A0A7X9R497	Bacteria	Bacillati	Actinomycetota	Actinomycetes	Mycobacteriales	Nocardiaceae	Rhodococcus	Rhodococcus sp. BL-253-APC-6A1W	1
A0A931MPK8	Bacteria	Bacillati	Actinomycetota	Actinomycetes	Mycobacteriales	Nocardiaceae	Rhodococcus	Rhodococcus sp. CX	1
A0A554QZ25	Bacteria	Bacillati	Actinomycetota	Actinomycetes	Mycobacteriales	Nocardiaceae	Rhodococcus	Rhodococcus sp. KBS0724	1
A0A0Q6JSU8	Bacteria	Bacillati	Actinomycetota	Actinomycetes	Mycobacteriales	Nocardiaceae	Rhodococcus	Rhodococcus sp. Leaf258	1
A0A494SZD0	Bacteria	Bacillati	Actinomycetota	Actinomycetes	Mycobacteriales	Nocardiaceae	Rhodococcus	Rhodococcus sp. P1Y	1
A0A143QAC9	Bacteria	Bacillati	Actinomycetota	Actinomycetes	Mycobacteriales	Nocardiaceae	Rhodococcus	Rhodococcus sp. PBTS 1	1
A0A0K2YLU3	Bacteria	Bacillati	Actinomycetota	Actinomycetes	Mycobacteriales	Nocardiaceae	Rhodococcus	Rhodococcus sp. RD6.2	1
A0A3M0HN50	Bacteria	Bacillati	Actinomycetota	Actinomycetes	Mycobacteriales	Nocardiaceae	Rhodococcus	Rhodococcus sp. SBT000017	1
A0A4P8PPP6	Bacteria	Bacillati	Actinomycetota	Actinomycetes	Mycobacteriales	Nocardiaceae	Rhodococcus	Rhodococcus sp. SGAir0479	1
A0A4V6NLL8	Bacteria	Bacillati	Actinomycetota	Actinomycetes	Mycobacteriales	Nocardiaceae	Rhodococcus	Rhodococcus sp. SMB37	1
A0A1G8KJ63	Bacteria	Bacillati	Actinomycetota	Actinomycetes	Mycobacteriales	Nocardiaceae	Rhodococcus	Rhodococcus triatomae	1
A0A0Q5QUU0	Bacteria	Bacillati	Actinomycetota	Actinomycetes	Mycobacteriales	Nocardiaceae	Williamsia	Williamsia herbipolensis Williamsia sp. Leaf354	2
A0A1X1AQ01	Bacteria	Bacillati	Actinomycetota	Actinomycetes	Mycobacteriales	Nocardiaceae	Williamsia	Williamsia limnetica Williamsia sp. 1135 Williamsia sp. 1138	3
V8CTX9	Bacteria	Bacillati	Actinomycetota	Actinomycetes	Mycobacteriales	Nocardiaceae	Williamsia	Williamsia muralis Williamsia sp. D3	2
A0A1N7HDE7	Bacteria	Bacillati	Actinomycetota	Actinomycetes	Mycobacteriales	Nocardiaceae	Williamsia	Williamsia sterculiae	1
E5XKS7	Bacteria	Bacillati	Actinomycetota	Actinomycetes	Mycobacteriales	Segniliparaceae	Segniliparus	Segniliparus rugosus ATCC BAA-974	1
A0A5C5R7L4	Bacteria	Bacillati	Actinomycetota	Actinomycetes	Mycobacteriales	Tsukamurellaceae	Tsukamurella	Tsukamurella asaccharolytica	1
A0A3P8KVT6	Bacteria	Bacillati	Actinomycetota	Actinomycetes	Mycobacteriales	Tsukamurellaceae	Tsukamurella	Tsukamurella conjunctivitidis Tsukamurella paurometabola Tsukamurella pulmonis Tsukamurella sputi Tsukamurella tyrosinosolvens	5
D5UYA4	Bacteria	Bacillati	Actinomycetota	Actinomycetes	Mycobacteriales	Tsukamurellaceae	Tsukamurella	Tsukamurella paurometabola DSM 20162	1
A0A4U6QME9	Bacteria	Bacillati	Actinomycetota	Actinomycetes	Nakamurellales	Nakamurellaceae	Nakamurella	Nakamurella flava	1
A0A7X5VC65	Bacteria	Bacillati	Actinomycetota	Actinomycetes	Propionibacteriales	Kribbellaceae	Kribbella	Kribbella shirazensis	1
A0A0Q6VC28	Bacteria	Bacillati	Actinomycetota	Actinomycetes	Propionibacteriales	Nocardioidaceae	Aeromicrobium	Aeromicrobium ginsengisoli Aeromicrobium sp. 9AM Aeromicrobium sp. Root236 Aeromicrobium sp. Root344	4
A0A2M9B8M9	Bacteria	Bacillati	Actinomycetota	Actinomycetes	Propionibacteriales	Nocardioidaceae	Mumia	Mumia flava	1
A0A543A1H5	Bacteria	Bacillati	Actinomycetota	Actinomycetes	Propionibacteriales	Nocardioidaceae	Nocardioides	Nocardioides albertanoniae	1
A0A7W5FAM4	Bacteria	Bacillati	Actinomycetota	Actinomycetes	Propionibacteriales	Nocardioidaceae	Nocardioides	Nocardioides albus Nocardioides panzhihuensis	2
A0A9X2D869	Bacteria	Bacillati	Actinomycetota	Actinomycetes	Propionibacteriales	Nocardioidaceae	Nocardioides	Nocardioides bruguierae	1
A0A417XS14	Bacteria	Bacillati	Actinomycetota	Actinomycetes	Propionibacteriales	Nocardioidaceae	Nocardioides	Nocardioides immobilis	1
A0A417XS38	Bacteria	Bacillati	Actinomycetota	Actinomycetes	Propionibacteriales	Nocardioidaceae	Nocardioides	Nocardioides immobilis	1
A0A3L8P0A4	Bacteria	Bacillati	Actinomycetota	Actinomycetes	Propionibacteriales	Nocardioidaceae	Nocardioides	Nocardioides mangrovicus	1
A0A1J4N9U1	Bacteria	Bacillati	Actinomycetota	Actinomycetes	Propionibacteriales	Nocardioidaceae	Nocardioides unclassified Nocardioidaceae	Nocardioidaceae bacterium Broad-1 Nocardioides luteus Nocardioides sp. NBC_00163 Nocardioides sp. YR527 Nocardioides turkmenicus	5
A0A6J4NTE5	Bacteria	Bacillati	Actinomycetota	Actinomycetes	Propionibacteriales	Propionibacteriaceae	environmental samples	uncultured Propionibacteriaceae bacterium	1
A0A1H9SG58	Bacteria	Bacillati	Actinomycetota	Actinomycetes	Propionibacteriales	Propionibacteriaceae	Propionibacterium	Propionibacterium cyclohexanicum	1
A0A5Q2FDG2	Bacteria	Bacillati	Actinomycetota	Actinomycetes	Propionibacteriales	Propionibacteriaceae	Raineyella	Raineyella fluvialis	1
A0AAU0M8I8	Bacteria	Bacillati	Actinomycetota	Actinomycetes	Propionibacteriales	Propionibacteriaceae	Raineyella	Raineyella sp. W15-4	1
A0A4R2J4T0	Bacteria	Bacillati	Actinomycetota	Actinomycetes	Pseudonocardiales	Pseudonocardiaceae	Actinocrispum	Actinocrispum wychmicini	1
A0A075UUZ8	Bacteria	Bacillati	Actinomycetota	Actinomycetes	Pseudonocardiales	Pseudonocardiaceae	Amycolatopsis	Amycolatopsis alba DSM 44262 Amycolatopsis azurea DSM 43854 Amycolatopsis coloradensis Amycolatopsis decaplanina DSM 44594 Amycolatopsis japonica Amycolatopsis keratiniphila Amycolatopsis keratiniphila subsp. keratiniphila Amycolatopsis lurida NRRL 2430 Amycolatopsis orientalis Amycolatopsis regifaucium Amycolatopsis sp. BJA-103 Amycolatopsis sp. WAC 01375 Amycolatopsis sp. WAC 04169 Amycolatopsi…	17
A0A1K1SY63	Bacteria	Bacillati	Actinomycetota	Actinomycetes	Pseudonocardiales	Pseudonocardiaceae	Amycolatopsis	Amycolatopsis australiensis	1
A0A9Y2IEG2	Bacteria	Bacillati	Actinomycetota	Actinomycetes	Pseudonocardiales	Pseudonocardiaceae	Amycolatopsis	Amycolatopsis carbonis	1
A0A9X2NEZ3	Bacteria	Bacillati	Actinomycetota	Actinomycetes	Pseudonocardiales	Pseudonocardiaceae	Amycolatopsis	Amycolatopsis iheyensis	1
A0A066U0S0	Bacteria	Bacillati	Actinomycetota	Actinomycetes	Pseudonocardiales	Pseudonocardiaceae	Amycolatopsis	Amycolatopsis mediterranei Amycolatopsis mediterranei S699 Amycolatopsis mediterranei U32 Amycolatopsis rifamycinica Amycolatopsis balhimycina DSM 5908 Amycolatopsis camponoti Amycolatopsis eburnea Amycolatopsis mongoliensis Amycolatopsis pretoriensis Amycolatopsis sp. 505 Amycolatopsis sp. Hca4 Amycolatopsis sp. NBC_01488 Amycolatopsis tolypomycina Amycolatopsis vancoresmycina DSM 44592	14
A0A974V2C6	Bacteria	Bacillati	Actinomycetota	Actinomycetes	Pseudonocardiales	Pseudonocardiaceae	Amycolatopsis	Amycolatopsis sp. FDAARGOS 1241	1
A0AAU4E992	Bacteria	Bacillati	Actinomycetota	Actinomycetes	Pseudonocardiales	Pseudonocardiaceae	Amycolatopsis	Amycolatopsis sp. NBC_00348 Amycolatopsis sp. NBC_00355	2
A0A6B2E062	Bacteria	Bacillati	Actinomycetota	Actinomycetes	Pseudonocardiales	Pseudonocardiaceae	Amycolatopsis	Amycolatopsis sp. SID8362	1
A0A9W6VD19	Bacteria	Bacillati	Actinomycetota	Actinomycetes	Pseudonocardiales	Pseudonocardiaceae	Amycolatopsis	Amycolatopsis taiwanensis	1
A0A229ST76	Bacteria	Bacillati	Actinomycetota	Actinomycetes	Pseudonocardiales	Pseudonocardiaceae	Amycolatopsis	Amycolatopsis vastitatis	1
A0A1H3J1V5	Bacteria	Bacillati	Actinomycetota	Actinomycetes	Pseudonocardiales	Pseudonocardiaceae	Amycolatopsis	Amycolatopsis xylanica	1
A0A1Y5Y4I4	Bacteria	Bacillati	Actinomycetota	Actinomycetes	Pseudonocardiales	Pseudonocardiaceae	Kibdelosporangium	Kibdelosporangium aridum	1
A0A0N9I0R5	Bacteria	Bacillati	Actinomycetota	Actinomycetes	Pseudonocardiales	Pseudonocardiaceae	Kibdelosporangium	Kibdelosporangium phytohabitans	1
A0A0K3BMV5	Bacteria	Bacillati	Actinomycetota	Actinomycetes	Pseudonocardiales	Pseudonocardiaceae	Kibdelosporangium	Kibdelosporangium sp. MJ126-NF4	1
A0A563EX49	Bacteria	Bacillati	Actinomycetota	Actinomycetes	Pseudonocardiales	Pseudonocardiaceae	Lentzea	Lentzea tibetensis	1
A0A263DX69	Bacteria	Bacillati	Actinomycetota	Actinomycetes	Pseudonocardiales	Pseudonocardiaceae	Pseudonocardia	Pseudonocardia sp. MH-G8	1
A0A1I6RRF1	Bacteria	Bacillati	Actinomycetota	Actinomycetes	Pseudonocardiales	Pseudonocardiaceae	Saccharopolyspora	Saccharopolyspora flava	1
A0A7W9M2A5	Bacteria	Bacillati	Actinomycetota	Actinomycetes	Pseudonocardiales	Pseudonocardiaceae	Saccharothrix	Saccharothrix ecbatanensis	1
A0A7Z0JAP3	Bacteria	Bacillati	Actinomycetota	Actinomycetes	Streptosporangiales	Nocardiopsidaceae	Nocardiopsis	Nocardiopsis aegyptia	1
A0A8H9LD44	Bacteria	Bacillati	Actinomycetota	Actinomycetes	Streptosporangiales	Streptosporangiaceae	Microbispora	Microbispora bryophytorum Microbispora catharanthi	2
A0A1N6UVR2	Bacteria	Bacillati	Actinomycetota	Actinomycetes	Streptosporangiales	Streptosporangiaceae	Microbispora	Microbispora hainanensis Microbispora rosea Microbispora sp. SCL1-1	3
A0A544ZGT2	Bacteria	Bacillati	Actinomycetota	Actinomycetes	Streptosporangiales	Streptosporangiaceae	Microbispora	Microbispora sp. KK1-11	1
A0A1V0AJ65	Bacteria	Bacillati	Actinomycetota	Actinomycetes	Streptosporangiales	Streptosporangiaceae	Nonomuraea	[Actinomadura] parvosata subsp. Kistnae	1
A0A7X0NXI0	Bacteria	Bacillati	Actinomycetota	Actinomycetes	Streptosporangiales	Streptosporangiaceae	Nonomuraea	Nonomuraea rubra Nonomuraea thailandensis	2
A0A7W0HPT0	Bacteria	Bacillati	Actinomycetota	Actinomycetes	Streptosporangiales	Streptosporangiaceae	Nonomuraea	Nonomuraea soli	1
A0A5D0QCH5	Bacteria	Bacillati	Actinomycetota	Actinomycetes	Streptosporangiales	Streptosporangiaceae	Nonomuraea	Nonomuraea sp. PA05	1
A0A3N1CYJ1	Bacteria	Bacillati	Actinomycetota	Actinomycetes	Streptosporangiales	Thermomonosporaceae	Actinocorallia	Actinocorallia herbida	1
A0A239CXP6	Bacteria	Bacillati	Actinomycetota	Actinomycetes	Streptosporangiales	Thermomonosporaceae	Actinomadura	Actinomadura meyerae	1
A0A2P4UQT7	Bacteria	Bacillati	Actinomycetota	Actinomycetes	Streptosporangiales	Thermomonosporaceae	Actinomadura	Actinomadura rayongensis Actinomadura rubteroloni	2
A0A6P2C4N2	Bacteria	Bacillati	Actinomycetota	Actinomycetes	Streptosporangiales	Treboniaceae	Trebonia	Trebonia kvetii	1
A0A2A3HAV4	Bacteria	Bacillati	Actinomycetota	Actinomycetes	unclassified Actinomycetes	NA	NA	Actinobacteria bacterium OK006	1
A0A0N1GB45	Bacteria	Bacillati	Actinomycetota	Actinomycetes	unclassified Actinomycetes	NA	NA	Actinobacteria bacterium OK074	1
Q828G8	Bacteria	Bacillati	Actinomycetota	Actinomycetes	unclassified Actinomycetes	NA	NA	Actinobacteria bacterium OV320	1
A0A150QR05	Bacteria	Pseudomonadati	Myxococcota	Myxococcia	Myxococcales	Polyangiaceae	Sorangium	Sorangium cellulosum	1
A0A4P2QXB1	Bacteria	Pseudomonadati	Myxococcota	Myxococcia	Myxococcales	Polyangiaceae	Sorangium	Sorangium cellulosum	1
A9FK32	Bacteria	Pseudomonadati	Myxococcota	Myxococcia	Myxococcales	Polyangiaceae	Sorangium	Sorangium cellulosum So ce56	1
A0A2L0EZF9	Bacteria	Pseudomonadati	Myxococcota	Myxococcia	Myxococcales	Polyangiaceae	Sorangium	Sorangium cellulosum Sorangium cellulosum So0157-2	2
A0A959WX53	Bacteria	Bacillati	Actinomycetota	Thermoleophilia	unclassified Thermoleophilia	NA	NA	Thermoleophilia bacterium	1
A0A959WIS0	Bacteria	Bacillati	Actinomycetota	Thermoleophilia	unclassified Thermoleophilia	NA	NA	Thermoleophilia bacterium	1
A0A933ULX6	Bacteria	Bacillati	Actinomycetota	unclassified Actinomyceto	NA	NA	NA	Actinomycetota bacterium	1
								SUMME	882

## Sheet: GdcR_Phylogeny_cgdAB associated
Uniprot ID	Superkingdom	Kingdom	Phylum	Class	Order	Family	Genus	Species	Value
A0A2D6CV49	Bacteria	Bacteria incertae sedis	Candidatus Poribacteria	unclassified Candidatus P	NA	NA	NA	Candidatus Poribacteria bacterium	1
A0A0U5F2F3	Bacteria	Pseudomonadati	Pseudomonadota	Alphaproteobacteria	Acetobacterales	Acetobacteraceae	Acetobacter	Acetobacter ghanensis Acetobacter sp. DsW_54 Acetobacter fabarum Acetobacter lovaniensis	4
A0A1A0DIN9	Bacteria	Pseudomonadati	Pseudomonadota	Alphaproteobacteria	Acetobacterales	Acetobacteraceae	Acetobacter	Acetobacter pasteurianus Acetobacter ascendens Acetobacter aceti Acetobacter pasteurianus NBRC 3188 Acetobacter pasteurianus NBRC 3278 Acetobacter estunensis Acetobacter pasteurianus subsp. pasteurianus Acetobacter pomorum Acetobacter aceti NBRC 14818 Acetobacter oryzifermentans Acetobacter pasteurianus IFO 3283-01 Acetobacter pomorum DM001	12
A0A4Y3TV08	Bacteria	Pseudomonadati	Pseudomonadota	Alphaproteobacteria	Acetobacterales	Acetobacteraceae	Acetobacter	Acetobacter peroxydans	1
A0A1Y3G124	Bacteria	Pseudomonadati	Pseudomonadota	Alphaproteobacteria	Acetobacterales	Acetobacteraceae	Acetobacter	Acetobacter sp. DmW_043	1
A0A5C1YNS9	Bacteria	Pseudomonadati	Pseudomonadota	Alphaproteobacteria	Acetobacterales	Acetobacteraceae	Acetobacter	Acetobacter vaccinii	1
E8RVC8	Bacteria	Pseudomonadati	Pseudomonadota	Alphaproteobacteria	Caulobacterales	Caulobacteraceae	Asticcacaulis	Asticcacaulis excentricus CB 48	1
A0A952FYJ4	Bacteria	Pseudomonadati	Pseudomonadota	Alphaproteobacteria	Caulobacterales	Caulobacteraceae	Asticcacaulis	Asticcacaulis sp.	1
A0A924MXG3	Bacteria	Pseudomonadati	Pseudomonadota	Alphaproteobacteria	Caulobacterales	Caulobacteraceae	Caulobacter	Caulobacter sp.	1
A0A4R3GX81	Bacteria	Pseudomonadati	Pseudomonadota	Alphaproteobacteria	Caulobacterales	Caulobacteraceae	Caulobacter	Caulobacter sp. BK020	1
B0T076	Bacteria	Pseudomonadati	Pseudomonadota	Alphaproteobacteria	Caulobacterales	Caulobacteraceae	Caulobacter	Caulobacter sp. K31	1
A0A0Q7W582	Bacteria	Pseudomonadati	Pseudomonadota	Alphaproteobacteria	Caulobacterales	Caulobacteraceae	Caulobacter	Caulobacter sp. Root1472 Caulobacter sp. UNC279MFTsu5.1 Caulobacter segnis	3
Q9A7A0	Bacteria	Pseudomonadati	Pseudomonadota	Alphaproteobacteria	Caulobacterales	Caulobacteraceae	Caulobacter	Caulobacter vibrioides CB15	1
A0A0H3C7P4	Bacteria	Pseudomonadati	Pseudomonadota	Alphaproteobacteria	Caulobacterales	Caulobacteraceae	Caulobacter	Caulobacter vibrioides NA1000	1
A0A974P569	Bacteria	Pseudomonadati	Pseudomonadota	Alphaproteobacteria	Caulobacterales	Caulobacteraceae	Phenylobacterium	Phenylobacterium glaciei	1
A0A941CZ15	Bacteria	Pseudomonadati	Pseudomonadota	Alphaproteobacteria	Caulobacterales	Caulobacteraceae	Phenylobacterium	Phenylobacterium glaciei Phenylobacterium sp.	2
A0A8I0CAV2	Bacteria	Pseudomonadati	Pseudomonadota	Alphaproteobacteria	Caulobacterales	Caulobacteraceae	Phenylobacterium	Phenylobacterium sp.	1
A0A2D7ZHS5	Bacteria	Pseudomonadati	Pseudomonadota	Alphaproteobacteria	Caulobacterales	Caulobacteraceae	Phenylobacterium	Phenylobacterium sp.	1
A0A9E3EAS7	Bacteria	Pseudomonadati	Pseudomonadota	Alphaproteobacteria	Caulobacterales	Caulobacteraceae	unclassified Caulobacteraceae	Caulobacteraceae bacterium	1
A0A0Q6TTZ3	Bacteria	Pseudomonadati	Pseudomonadota	Alphaproteobacteria	Caulobacterales	Caulobacteraceae_x000D_unclassified Caulobactera	Caulobacter_x000D_NA	Caulobacter sp. Root342 Caulobacter sp. Root343 Caulobacter sp. Root1455 Caulobacterales bacterium	4
A0A501PA97	Bacteria	Pseudomonadati	Pseudomonadota	Alphaproteobacteria	Emcibacterales	Emcibacteraceae	Emcibacter	Emcibacter nanhaiensis	1
A0A5E4P1F7	Bacteria	Pseudomonadati	Pseudomonadota	Alphaproteobacteria	Hyphomicrobiales	Beijerinckiaceae	unclassified Beijerinckiaceae	Beijerinckiaceae bacterium RH AL1	1
A0A679JMX7	Bacteria	Pseudomonadati	Pseudomonadota	Alphaproteobacteria	Hyphomicrobiales	Methylobacteriaceae	Methylobacterium	Methylobacterium bullatum	1
A0A0S9SGB2	Bacteria	Pseudomonadati	Pseudomonadota	Alphaproteobacteria	Hyphomicrobiales	Methylobacteriaceae	Methylobacterium	Methylobacterium sp. Leaf113	1
A0A0Q5Z2V9	Bacteria	Pseudomonadati	Pseudomonadota	Alphaproteobacteria	Hyphomicrobiales	Methylobacteriaceae	Methylobacterium	Methylobacterium sp. Leaf399	1
A0A0Q4UVC3	Bacteria	Pseudomonadati	Pseudomonadota	Alphaproteobacteria	Hyphomicrobiales	Methylobacteriaceae	Methylobacterium	Methylobacterium sp. Leaf86 Methylobacterium sp. Leaf91	2
A0A0Q4XHT4	Bacteria	Pseudomonadati	Pseudomonadota	Alphaproteobacteria	Hyphomicrobiales	Methylobacteriaceae	Methylobacterium	Methylobacterium sp. Leaf93	1
A0A3S0GFZ2	Bacteria	Pseudomonadati	Pseudomonadota	Alphaproteobacteria	Hyphomicrobiales	Nitrobacteraceae	unclassified Bradyrhizobiaceae	Bradyrhizobiaceae bacterium	1
A0A2D4VEM4	Bacteria	Pseudomonadati	Pseudomonadota	Alphaproteobacteria	Hyphomicrobiales	Parvibaculaceae	Parvibaculum	Parvibaculum sp.	1
A0A844ZMT2	Bacteria	Pseudomonadati	Pseudomonadota	Alphaproteobacteria	Sphingomonadales	Erythrobacteraceae	Alteraurantiacibacter	Alteraurantiacibacter aestuarii	1
A0A4T3F061	Bacteria	Pseudomonadati	Pseudomonadota	Alphaproteobacteria	Sphingomonadales	Erythrobacteraceae	Alteraurantiacibacter	Alteraurantiacibacter aquimixticola	1
A0A2Z5Z0S0	Bacteria	Pseudomonadati	Pseudomonadota	Alphaproteobacteria	Sphingomonadales	Erythrobacteraceae	Altererythrobacter	Altererythrobacter sp. B11	1
A0A0T2QA94	Bacteria	Pseudomonadati	Pseudomonadota	Alphaproteobacteria	Sphingomonadales	Erythrobacteraceae	Altererythrobacter	Altererythrobacter sp. Root672	1
A0A6I4T549	Bacteria	Pseudomonadati	Pseudomonadota	Alphaproteobacteria	Sphingomonadales	Erythrobacteraceae	Altericroceibacterium	Altericroceibacterium endophyticum	1
A0A845A629	Bacteria	Pseudomonadati	Pseudomonadota	Alphaproteobacteria	Sphingomonadales	Erythrobacteraceae	Altericroceibacterium	Altericroceibacterium indicum	1
A0A3A1P0H4	Bacteria	Pseudomonadati	Pseudomonadota	Alphaproteobacteria	Sphingomonadales	Erythrobacteraceae	Aurantiacibacter	Aurantiacibacter xanthus	1
A0A1Z1FBK3	Bacteria	Pseudomonadati	Pseudomonadota	Alphaproteobacteria	Sphingomonadales	Erythrobacteraceae	Croceicoccus	Croceicoccus marinus	1
A0A917DSM2	Bacteria	Pseudomonadati	Pseudomonadota	Alphaproteobacteria	Sphingomonadales	Erythrobacteraceae	Croceicoccus	Croceicoccus mobilis	1
A0A2D6CV49	Bacteria	Pseudomonadati	Pseudomonadota	Alphaproteobacteria	Sphingomonadales	Erythrobacteraceae	Croceicoccus	Croceicoccus sp.	1
A0A7T7VRR4	Bacteria	Pseudomonadati	Pseudomonadota	Alphaproteobacteria	Sphingomonadales	Erythrobacteraceae	Croceicoccus	Croceicoccus sp. YJ47	1
A0A922WR15	Bacteria	Pseudomonadati	Pseudomonadota	Alphaproteobacteria	Sphingomonadales	Erythrobacteraceae	Erythrobacter	Erythrobacter sp.	1
A0A1A7BHT4	Bacteria	Pseudomonadati	Pseudomonadota	Alphaproteobacteria	Sphingomonadales	Erythrobacteraceae	Erythrobacter/Porphyrobacter group	Erythrobacter dokdonensis DSW-74	1
A0A1E4AT73	Bacteria	Pseudomonadati	Pseudomonadota	Alphaproteobacteria	Sphingomonadales	Erythrobacteraceae	Erythrobacter/Porphyrobacter group	Erythrobacter sp. SCN 62-14	1
A0A1D2RME9	Bacteria	Pseudomonadati	Pseudomonadota	Alphaproteobacteria	Sphingomonadales	Erythrobacteraceae	Erythrobacter/Porphyrobacter group	Erythrobacter sp. SCN 68-10	1
A0A0P6WJ01	Bacteria	Pseudomonadati	Pseudomonadota	Alphaproteobacteria	Sphingomonadales	Erythrobacteraceae	Erythrobacter/Porphyrobacter group	Erythrobacter sp. SG61-1L	1
A0A0N0JR57	Bacteria	Pseudomonadati	Pseudomonadota	Alphaproteobacteria	Sphingomonadales	Erythrobacteraceae	Erythrobacter/Porphyrobacter group	Porphyrobacter sp. AAP60 Porphyrobacter sp. LM 6 Porphyrobacter sp. TH134	3
A0A2Z2PHG2	Bacteria	Pseudomonadati	Pseudomonadota	Alphaproteobacteria	Sphingomonadales	Erythrobacteraceae	Erythrobacter/Porphyrobacter group	Porphyrobacter sp. CACIAM 03H1	1
A0A2L0GM41	Bacteria	Pseudomonadati	Pseudomonadota	Alphaproteobacteria	Sphingomonadales	Erythrobacteraceae	Erythrobacter/Porphyrobacter group	Porphyrobacter sp. HT-58-2	1
A0A0P8BC29	Bacteria	Pseudomonadati	Pseudomonadota	Alphaproteobacteria	Sphingomonadales	Erythrobacteraceae	Erythrobacter/Porphyrobacter group_x000D_Erythrobacter	Porphyrobacter sp. HL-46 Erythrobacter sanguineus	2
A0A3M9YT43	Bacteria	Pseudomonadati	Pseudomonadota	Alphaproteobacteria	Sphingomonadales	Erythrobacteraceae	Erythrobacter/Porphyrobacter group_x000D_Erythrobacter	Porphyrobacter sp. IPPAS B-1204 Erythrobacter ramosus	2
A0A222EYY2	Bacteria	Pseudomonadati	Pseudomonadota	Alphaproteobacteria	Sphingomonadales	Erythrobacteraceae	Qipengyuania	Qipengyuania flava	1
A0A0P7WDI7	Bacteria	Pseudomonadati	Pseudomonadota	Alphaproteobacteria	Sphingomonadales	Erythrobacteraceae	unclassified Erythrobacteraceae Erythrobacter/Porphyrobacter group	Erythrobacteraceae bacterium HL-111 Erythrobacter sp. HL-111	2
A0A558RBT3	Bacteria	Pseudomonadati	Pseudomonadota	Alphaproteobacteria	Sphingomonadales	Rhizorhabdaceae	Alterirhizorhabdus	Alterirhizorhabdus solaris	1
A0A2V3V9A0	Bacteria	Pseudomonadati	Pseudomonadota	Alphaproteobacteria	Sphingomonadales	Sphingomonadaceae	Blastomonas	Blastomonas natatoria Blastomonas sp. CACIA14H2	2
A0A0N1BGW6	Bacteria	Pseudomonadati	Pseudomonadota	Alphaproteobacteria	Sphingomonadales	Sphingomonadaceae	Blastomonas	Blastomonas sp. AAP25 Blastomonas sp. RAC04	2
A0A0J7XX66	Bacteria	Pseudomonadati	Pseudomonadota	Alphaproteobacteria	Sphingomonadales	Sphingomonadaceae	Novosphingobium	Novosphingobium barchaimii LL02	1
A0A0J7XWP9	Bacteria	Pseudomonadati	Pseudomonadota	Alphaproteobacteria	Sphingomonadales	Sphingomonadaceae	Novosphingobium	Novosphingobium barchaimii LL02 Novosphingobium sp. P6W	2
A0A7X1FU38	Bacteria	Pseudomonadati	Pseudomonadota	Alphaproteobacteria	Sphingomonadales	Sphingomonadaceae	Novosphingobium	Novosphingobium flavum	1
A0A7W6C4A8	Bacteria	Pseudomonadati	Pseudomonadota	Alphaproteobacteria	Sphingomonadales	Sphingomonadaceae	Novosphingobium	Novosphingobium fluoreni	1
A0A124JU76	Bacteria	Pseudomonadati	Pseudomonadota	Alphaproteobacteria	Sphingomonadales	Sphingomonadaceae	Novosphingobium	Novosphingobium fuchskuhlense Novosphingobium sediminis	2
A0A7W5ZYI6	Bacteria	Pseudomonadati	Pseudomonadota	Alphaproteobacteria	Sphingomonadales	Sphingomonadaceae	Novosphingobium	Novosphingobium hassiacum	1
T0IJQ6	Bacteria	Pseudomonadati	Pseudomonadota	Alphaproteobacteria	Sphingomonadales	Sphingomonadaceae	Novosphingobium	Novosphingobium lindaniclasticum LE124	1
T0IDZ0	Bacteria	Pseudomonadati	Pseudomonadota	Alphaproteobacteria	Sphingomonadales	Sphingomonadaceae	Novosphingobium	Novosphingobium lindaniclasticum LE124	1
A0A0B1ZKR5	Bacteria	Pseudomonadati	Pseudomonadota	Alphaproteobacteria	Sphingomonadales	Sphingomonadaceae	Novosphingobium	Novosphingobium malaysiense Novosphingobium sp.	2
A0A031K2I0	Bacteria	Pseudomonadati	Pseudomonadota	Alphaproteobacteria	Sphingomonadales	Sphingomonadaceae	Novosphingobium	Novosphingobium resinovorum	1
A0A1D8AAA0	Bacteria	Pseudomonadati	Pseudomonadota	Alphaproteobacteria	Sphingomonadales	Sphingomonadaceae	Novosphingobium	Novosphingobium resinovorum Novosphingobium guangzhouense	2
A0A1D8AA63	Bacteria	Pseudomonadati	Pseudomonadota	Alphaproteobacteria	Sphingomonadales	Sphingomonadaceae	Novosphingobium	Novosphingobium resinovorum Novosphingobium guangzhouense	2
A0A031K187	Bacteria	Pseudomonadati	Pseudomonadota	Alphaproteobacteria	Sphingomonadales	Sphingomonadaceae	Novosphingobium	Novosphingobium resinovorum Novosphingobium pentaromativorans Novosphingobium sp. PhB57 Novosphingobium sp. TCA1 Novosphingobium silvae	5
A0A7W6CDM6	Bacteria	Pseudomonadati	Pseudomonadota	Alphaproteobacteria	Sphingomonadales	Sphingomonadaceae	Novosphingobium	Novosphingobium sediminicola	1
A0A7X4K8L2	Bacteria	Pseudomonadati	Pseudomonadota	Alphaproteobacteria	Sphingomonadales	Sphingomonadaceae	Novosphingobium	Novosphingobium silvae	1
A0A923YWN2	Bacteria	Pseudomonadati	Pseudomonadota	Alphaproteobacteria	Sphingomonadales	Sphingomonadaceae	Novosphingobium	Novosphingobium sp.	1
A0A519QMS5	Bacteria	Pseudomonadati	Pseudomonadota	Alphaproteobacteria	Sphingomonadales	Sphingomonadaceae	Novosphingobium	Novosphingobium sp.	1
A0A258UZM5	Bacteria	Pseudomonadati	Pseudomonadota	Alphaproteobacteria	Sphingomonadales	Sphingomonadaceae	Novosphingobium	Novosphingobium sp. 28-62-57 Novosphingobium sp. 16-62-11	2
A0A8E2KUD0	Bacteria	Pseudomonadati	Pseudomonadota	Alphaproteobacteria	Sphingomonadales	Sphingomonadaceae	Novosphingobium	Novosphingobium sp. 63-713	1
A0A653J878	Bacteria	Pseudomonadati	Pseudomonadota	Alphaproteobacteria	Sphingomonadales	Sphingomonadaceae	Novosphingobium	Novosphingobium sp. 9U Novosphingobium chloroacetimidivorans	2
A0A0N0JI38	Bacteria	Pseudomonadati	Pseudomonadota	Alphaproteobacteria	Sphingomonadales	Sphingomonadaceae	Novosphingobium	Novosphingobium sp. AAP1 Novosphingobium sp. GV027 Novosphingobium sp. BK369	3
A0A0N1C4Y8	Bacteria	Pseudomonadati	Pseudomonadota	Alphaproteobacteria	Sphingomonadales	Sphingomonadaceae	Novosphingobium	Novosphingobium sp. AAP93	1
J2HH39	Bacteria	Pseudomonadati	Pseudomonadota	Alphaproteobacteria	Sphingomonadales	Sphingomonadaceae	Novosphingobium	Novosphingobium sp. AP12	1
J3AQ07	Bacteria	Pseudomonadati	Pseudomonadota	Alphaproteobacteria	Sphingomonadales	Sphingomonadaceae	Novosphingobium	Novosphingobium sp. AP12	1
A0A1W1ZS30	Bacteria	Pseudomonadati	Pseudomonadota	Alphaproteobacteria	Sphingomonadales	Sphingomonadaceae	Novosphingobium	Novosphingobium sp. B1 Novosphingobium olei	2
A0A5D0WYG1	Bacteria	Pseudomonadati	Pseudomonadota	Alphaproteobacteria	Sphingomonadales	Sphingomonadaceae	Novosphingobium	Novosphingobium sp. BW1	1
A0A7X8S4B8	Bacteria	Pseudomonadati	Pseudomonadota	Alphaproteobacteria	Sphingomonadales	Sphingomonadaceae	Novosphingobium	Novosphingobium sp. ERN07	1
A0A0Q4BVT6	Bacteria	Pseudomonadati	Pseudomonadota	Alphaproteobacteria	Sphingomonadales	Sphingomonadaceae	Novosphingobium	Novosphingobium sp. Leaf2	1
A0A0Q4C3E2	Bacteria	Pseudomonadati	Pseudomonadota	Alphaproteobacteria	Sphingomonadales	Sphingomonadaceae	Novosphingobium	Novosphingobium sp. Leaf2	1
A0A0S6X1K3	Bacteria	Pseudomonadati	Pseudomonadota	Alphaproteobacteria	Sphingomonadales	Sphingomonadaceae	Novosphingobium	Novosphingobium sp. MBES04	1
A0A0S6X1M7	Bacteria	Pseudomonadati	Pseudomonadota	Alphaproteobacteria	Sphingomonadales	Sphingomonadaceae	Novosphingobium	Novosphingobium sp. MBES04 Novosphingobium sp. BW1	2
A0A1W7M463	Bacteria	Pseudomonadati	Pseudomonadota	Alphaproteobacteria	Sphingomonadales	Sphingomonadaceae	Novosphingobium	Novosphingobium sp. MD-1	1
A0A2Z5EF80	Bacteria	Pseudomonadati	Pseudomonadota	Alphaproteobacteria	Sphingomonadales	Sphingomonadaceae	Novosphingobium	Novosphingobium sp. P6W	1
A0A257GBS7	Bacteria	Pseudomonadati	Pseudomonadota	Alphaproteobacteria	Sphingomonadales	Sphingomonadaceae	Novosphingobium	Novosphingobium sp. PASSN1	1
A0A4R1UT38	Bacteria	Pseudomonadati	Pseudomonadota	Alphaproteobacteria	Sphingomonadales	Sphingomonadaceae	Novosphingobium	Novosphingobium sp. PhB165	1
A0A4R1UUR3	Bacteria	Pseudomonadati	Pseudomonadota	Alphaproteobacteria	Sphingomonadales	Sphingomonadaceae	Novosphingobium	Novosphingobium sp. PhB165	1
A0A4R3TD49	Bacteria	Pseudomonadati	Pseudomonadota	Alphaproteobacteria	Sphingomonadales	Sphingomonadaceae	Novosphingobium	Novosphingobium sp. PhB57	1
I9WEK4	Bacteria	Pseudomonadati	Pseudomonadota	Alphaproteobacteria	Sphingomonadales	Sphingomonadaceae	Novosphingobium	Novosphingobium sp. Rr 2-17	1
I9C4B6	Bacteria	Pseudomonadati	Pseudomonadota	Alphaproteobacteria	Sphingomonadales	Sphingomonadaceae	Novosphingobium	Novosphingobium sp. Rr 2-17	1
A0A6H9HKD7	Bacteria	Pseudomonadati	Pseudomonadota	Alphaproteobacteria	Sphingomonadales	Sphingomonadaceae	Novosphingobium	Novosphingobium sp. TCA1	1
A0A0B8ZRV1	Bacteria	Pseudomonadati	Pseudomonadota	Alphaproteobacteria	Sphingomonadales	Sphingomonadaceae	Novosphingobium	Novosphingobium subterraneum Novosphingobium sp. ES2-1 Novosphingobium taihuense Novosphingobium sp. ERW19	4
A0A3S2UWG3	Bacteria	Pseudomonadati	Pseudomonadota	Alphaproteobacteria	Sphingomonadales	Sphingomonadaceae	Novosphingobium	Novosphingobium umbonatum	1
A0A940GPJ3	Bacteria	Pseudomonadati	Pseudomonadota	Alphaproteobacteria	Sphingomonadales	Sphingomonadaceae	Novosphingobium Candidatus Andeanibacterium	Novosphingobium sp. Candidatus Andeanibacterium colombiense	2
A0A1I2R6V5	Bacteria	Pseudomonadati	Pseudomonadota	Alphaproteobacteria	Sphingomonadales	Sphingomonadaceae	Novosphingobium_x000D_Sphingobium	Novosphingobium sp. CF614 Sphingobium boeckii	2
A0A0N1C130	Bacteria	Pseudomonadati	Pseudomonadota	Alphaproteobacteria	Sphingomonadales	Sphingomonadaceae	Novosphingobium_x000D_Sphingomonas	Novosphingobium sp. AAP83 Novosphingobium sp. 32-60-15 Sphingomonas ursincola Novosphingobium aromaticivorans DSM 12444	4
A0A158RZ52	Bacteria	Pseudomonadati	Pseudomonadota	Alphaproteobacteria	Sphingomonadales	Sphingomonadaceae	Novosphingobium_x000D_unclassified Sphingomonadaceae_x000D_Sphingobium	Novosphingobium sp. KN65.2 Sphingomonadaceae bacterium MED-G03 Sphingobium sp. Novosphingobium sp. PP1Y	4
A0A0S3EV54	Bacteria	Pseudomonadati	Pseudomonadota	Alphaproteobacteria	Sphingomonadales	Sphingomonadaceae	Sphingobium	Sphingobium baderi	1
A0A1E1F503	Bacteria	Pseudomonadati	Pseudomonadota	Alphaproteobacteria	Sphingomonadales	Sphingomonadaceae	Sphingobium	Sphingobium cloacae	1
A0A4Q1KK55	Bacteria	Pseudomonadati	Pseudomonadota	Alphaproteobacteria	Sphingomonadales	Sphingomonadaceae	Sphingobium	Sphingobium fluviale	1
A0A7W6GMP7	Bacteria	Pseudomonadati	Pseudomonadota	Alphaproteobacteria	Sphingomonadales	Sphingomonadaceae	Sphingobium	Sphingobium fontiphilum	1
A0A292ZMZ7	Bacteria	Pseudomonadati	Pseudomonadota	Alphaproteobacteria	Sphingomonadales	Sphingomonadaceae	Sphingobium	Sphingobium fuliginis	1
A0A086P757	Bacteria	Pseudomonadati	Pseudomonadota	Alphaproteobacteria	Sphingomonadales	Sphingomonadaceae	Sphingobium	Sphingobium herbicidovorans NBRC 16415 Sphingobium sp. MI1205 Sphingobium indicum Sphingobium indicum F2 Sphingobium indicum UT26S Sphingobium quisquiliarum P25	6
A0A975K962	Bacteria	Pseudomonadati	Pseudomonadota	Alphaproteobacteria	Sphingomonadales	Sphingomonadaceae	Sphingobium	Sphingobium phenoxybenzoativorans	1
A0A2W6W9R7	Bacteria	Pseudomonadati	Pseudomonadota	Alphaproteobacteria	Sphingomonadales	Sphingomonadaceae	Sphingobium	Sphingobium sp.	1
A0A940FPU8	Bacteria	Pseudomonadati	Pseudomonadota	Alphaproteobacteria	Sphingomonadales	Sphingomonadaceae	Sphingobium	Sphingobium sp.	1
T0HTJ9	Bacteria	Pseudomonadati	Pseudomonadota	Alphaproteobacteria	Sphingomonadales	Sphingomonadaceae	Sphingobium	Sphingobium sp. HDIP04	1
A0A2L0ADP1	Bacteria	Pseudomonadati	Pseudomonadota	Alphaproteobacteria	Sphingomonadales	Sphingomonadaceae	Sphingobium	Sphingobium sp. SCG-1	1
A0A0C5X2Z3	Bacteria	Pseudomonadati	Pseudomonadota	Alphaproteobacteria	Sphingomonadales	Sphingomonadaceae	Sphingobium	Sphingobium sp. YBL2 Sphingobium sp. SA916 Sphingobium fuliginis Sphingobium fuliginis ATCC 27551	4
A0A841J3F1	Bacteria	Pseudomonadati	Pseudomonadota	Alphaproteobacteria	Sphingomonadales	Sphingomonadaceae	Sphingobium	Sphingobium subterraneum	1
T0IQ11	Bacteria	Pseudomonadati	Pseudomonadota	Alphaproteobacteria	Sphingomonadales	Sphingomonadaceae	Sphingobium	Sphingobium ummariense RL-3	1
A0A2A4I9N7	Bacteria	Pseudomonadati	Pseudomonadota	Alphaproteobacteria	Sphingomonadales	Sphingomonadaceae	Sphingomonas	Sphingomonas adhaesiva	1
A0A7G5YXL4	Bacteria	Pseudomonadati	Pseudomonadota	Alphaproteobacteria	Sphingomonadales	Sphingomonadaceae	Sphingomonas	Sphingomonas alpina	1
A0A2A4I3S5	Bacteria	Pseudomonadati	Pseudomonadota	Alphaproteobacteria	Sphingomonadales	Sphingomonadaceae	Sphingomonas	Sphingomonas ginsenosidimutans	1
A0A514WNQ6	Bacteria	Pseudomonadati	Pseudomonadota	Alphaproteobacteria	Sphingomonadales	Sphingomonadaceae	Sphingomonas	Sphingomonas sp. IC081	1
A0A0Q8XIW0	Bacteria	Pseudomonadati	Pseudomonadota	Alphaproteobacteria	Sphingomonadales	Sphingomonadaceae	Sphingomonas	Sphingomonas sp. Root241	1
A0A196MT94	Bacteria	Pseudomonadati	Pseudomonadota	Alphaproteobacteria	Sphingomonadales	Sphingomonadaceae	Sphingomonas	Sphingomonas sp. TDK1 Sphingomonas sp. NFR04 Sphingomonas pokkalii Sphingomonas sp. ABOLE Sphingomonas trueperi	5
A0A0W1QL81	Bacteria	Pseudomonadati	Pseudomonadota	Alphaproteobacteria	Sphingomonadales	Sphingomonadaceae	Sphingomonas	Sphingomonas sp. WG	1
A0A2W5PEX7	Bacteria	Pseudomonadati	Pseudomonadota	Alphaproteobacteria	Sphingomonadales	Sphingomonadaceae	Sphingomonas	Sphingomonas taxi	1
A0A127MJT5	Bacteria	Pseudomonadati	Pseudomonadota	Alphaproteobacteria	Sphingomonadales	Sphingomonadaceae	Sphingorhabdus	Sphingorhabdus sp. M41	1
A0A2D3RH43	Bacteria	Pseudomonadati	Pseudomonadota	Alphaproteobacteria	Sphingomonadales	Sphingomonadaceae	Sphingorhabdus	Sphingorhabdus sp. YGSMI21 Sphingorhabdus sp. 109	2
A0A976J2V7	Bacteria	Pseudomonadati	Pseudomonadota	Alphaproteobacteria	Sphingomonadales	unclassified Sphingomonad	NA	Sphingomonadales bacterium	1
A0A257YDU7	Bacteria	Pseudomonadati	Pseudomonadota	Alphaproteobacteria	Sphingomonadales	unclassified Sphingomonad	NA	Sphingomonadales bacterium 12-68-11	1
A0A258IDF3	Bacteria	Pseudomonadati	Pseudomonadota	Alphaproteobacteria	Sphingomonadales	unclassified Sphingomonad	NA	Sphingomonadales bacterium 32-64-17	1
A0A1M3HUX5	Bacteria	Pseudomonadati	Pseudomonadota	Alphaproteobacteria	Sphingomonadales	unclassified Sphingomonad	NA	Sphingomonadales bacterium 63-6	1
A0A838MKG0	Bacteria	Pseudomonadati	Pseudomonadota	Alphaproteobacteria	Sphingomonadales_x000D_unclassified Alphaproteobacter	unclassified Sphingomonad_x000D_NA	NA	Sphingomonadales bacterium Alphaproteobacteria bacterium	2
A0A950IMD7	Bacteria	Pseudomonadati	Pseudomonadota	Betaproteobacteria	Burkholderiales	Burkholderiaceae	unclassified Burkholderiaceae	Burkholderiaceae bacterium	1
A0A923QJH8	Bacteria	Pseudomonadati	Pseudomonadota	Betaproteobacteria	Burkholderiales	Burkholderiaceae	unclassified Burkholderiaceae	Burkholderiaceae bacterium	1
A0A924ZDP9	Bacteria	Pseudomonadati	Pseudomonadota	Betaproteobacteria	Burkholderiales	Burkholderiales genera in	Rhizobacter	Rhizobacter sp.	1
A0A3N7HUJ2	Bacteria	Pseudomonadati	Pseudomonadota	Betaproteobacteria	Burkholderiales	Sphaerotilaceae	Piscinibacter	Piscinibacter terrae	1
A0A9E3CX73	Bacteria	Pseudomonadati	Pseudomonadota	Betaproteobacteria	Burkholderiales	Sphaerotilaceae	Roseateles	Roseateles sp.	1
A0A1F4G5V9	Bacteria	Pseudomonadati	Pseudomonadota	Betaproteobacteria	Burkholderiales	unclassified Burkholderia	NA	Burkholderiales bacterium RIFCSPHIGHO2_01_FULL_63_	1
A0A1F4N7U6	Bacteria	Pseudomonadati	Pseudomonadota	Betaproteobacteria	Burkholderiales	unclassified Burkholderia	NA	Burkholderiales bacterium RIFCSPLOWO2_12_FULL_64_9	1
A0A139BV67	Bacteria	Pseudomonadati	Pseudomonadota	Betaproteobacteria	Nitrosomonadales	Gallionellaceae	Gallionella	Candidatus Gallionella acididurans	1
A0A0B7J1X5	Bacteria	Pseudomonadati	Pseudomonadota	Betaproteobacteria	Nitrosomonadales	Methylophilaceae	Candidatus Methylopumilus	Candidatus Methylopumilus turicensis	1
A0A8D5K0C3	Bacteria	Pseudomonadati	Pseudomonadota	Betaproteobacteria	Nitrosomonadales	Methylophilaceae	Methyloradius	Methyloradius palustris	1
C6XCC3	Bacteria	Pseudomonadati	Pseudomonadota	Betaproteobacteria	Nitrosomonadales	Methylophilaceae	Methylovorus	Methylovorus glucosotrophus SIP3-4	1
A0A1A9T3Q2	Bacteria	Pseudomonadati	Pseudomonadota	Betaproteobacteria	Nitrosomonadales	Methylophilaceae	Methylovorus	Methylovorus sp. MM2	1
A0A2R5FAB9	Bacteria	Pseudomonadati	Pseudomonadota	Betaproteobacteria	Nitrosomonadales	Methylophilaceae	Novimethylophilus	Novimethylophilus kurashikiensis	1
A0A3N0V6F7	Bacteria	Pseudomonadati	Pseudomonadota	Betaproteobacteria	Nitrosomonadales	Methylophilaceae	Pseudomethylobacillus	Pseudomethylobacillus aquaticus	1
A0A925AU55	Bacteria	Pseudomonadati	Pseudomonadota	Betaproteobacteria	Nitrosomonadales	Methylophilaceae	unclassified Methylophilaceae	Methylophilaceae bacterium	1
A0A4R1BCZ4	Bacteria	Pseudomonadati	Pseudomonadota	Betaproteobacteria	Nitrosomonadales	Thiobacillaceae	Parasulfuritortus	Parasulfuritortus cantonensis	1
A0A9D6H0J4	Bacteria	Pseudomonadati	Pseudomonadota	Betaproteobacteria	Nitrosomonadales	Thiobacillaceae	Thiobacillus	Thiobacillus sp.	1
A0A7L5YE25	Bacteria	Pseudomonadati	Pseudomonadota	Betaproteobacteria	Nitrosomonadales	Thiobacillaceae	Thiobacillus	Thiobacillus sp.	1
A0A5C7RYY8	Bacteria	Pseudomonadati	Pseudomonadota	Betaproteobacteria	Nitrosomonadales	Thiobacillaceae	Thiobacillus	Thiobacillus sp.	1
A0A8I1NA75	Bacteria	Pseudomonadati	Pseudomonadota	Betaproteobacteria	Nitrosomonadales	Thiobacillaceae	Thiobacillus	Thiobacillus sp.	1
A0A258ZG59	Bacteria	Pseudomonadati	Pseudomonadota	Betaproteobacteria	Nitrosomonadales	unclassified Nitrosomonad	NA	Gallionellales bacterium 24-53-125	1
Q47JZ6	Bacteria	Pseudomonadati	Pseudomonadota	Betaproteobacteria	Rhodocyclales	Azonexaceae	Dechloromonas	Dechloromonas aromatica RCB	1
A0A431MG61	Bacteria	Pseudomonadati	Pseudomonadota	Betaproteobacteria	Rhodocyclales	Rhodocyclaceae	unclassified Rhodocyclaceae	Rhodocyclaceae bacterium	1
A0A545TAJ5	Bacteria	Pseudomonadati	Pseudomonadota	Gammaproteobacteria	Cellvibrionales	Cellvibrionaceae	Exilibacterium	Exilibacterium tricleocarpae	1
A0A369BW33	Bacteria	Pseudomonadati	Pseudomonadota	Gammaproteobacteria	Chromatiales	Ectothiorhodospiraceae	Thioalbus	Thioalbus denitrificans	1
B8GQ08	Bacteria	Pseudomonadati	Pseudomonadota	Gammaproteobacteria	Chromatiales	Ectothiorhodospiraceae	Thioalkalivibrio	Thioalkalivibrio sulfidiphilus HL-EbGr7	1
A0A191ZHN4	Bacteria	Pseudomonadati	Pseudomonadota	Gammaproteobacteria	Chromatiales	Halothiobacillaceae	Halothiobacillus	Halothiobacillus diazotrophicus	1
A0A009IIV4	Bacteria	Pseudomonadati	Pseudomonadota	Gammaproteobacteria	Moraxellales	Moraxellaceae	Acinetobacter	Acinetobacter baumannii 1295743 Acinetobacter sp. 742879 Acinetobacter sp. 1564232 Acinetobacter baumannii Acinetobacter bereziniae Acinetobacter baumannii MRSN 3527 Acinetobacter calcoaceticus Acinetobacter baumannii WM99c Acinetobacter pittii Acinetobacter baumannii MDR-ZJ06 Acinetobacter baumannii AB0057 Acinetobacter sp. AOR18_HL Acinetobacter nosocomialis 28F Acinetobacter phage MD-2021a Aci…	30
N9EAX9	Bacteria	Pseudomonadati	Pseudomonadota	Gammaproteobacteria	Moraxellales	Moraxellaceae	Acinetobacter	Acinetobacter beijerinckii CIP 110307 Acinetobacter beijerinckii ANC 3835	2
A0A4R1XEL5	Bacteria	Pseudomonadati	Pseudomonadota	Gammaproteobacteria	Moraxellales	Moraxellaceae	Acinetobacter	Acinetobacter calcoaceticus	1
N9PJV1	Bacteria	Pseudomonadati	Pseudomonadota	Gammaproteobacteria	Moraxellales	Moraxellaceae	Acinetobacter	Acinetobacter colistiniresistens	1
A0A1A7R8D2	Bacteria	Pseudomonadati	Pseudomonadota	Gammaproteobacteria	Moraxellales	Moraxellaceae	Acinetobacter	Acinetobacter gandensis	1
A0A350EBU8	Bacteria	Pseudomonadati	Pseudomonadota	Gammaproteobacteria	Moraxellales	Moraxellaceae	Acinetobacter	Acinetobacter junii Acinetobacter haemolyticus Acinetobacter halotolerans Acinetobacter suaedae Acinetobacter sp. CIP-A165 Acinetobacter sp. NIPH 298	6
A0A6G8S467	Bacteria	Pseudomonadati	Pseudomonadota	Gammaproteobacteria	Moraxellales	Moraxellaceae	Acinetobacter	Acinetobacter lanii	1
A0A1G6NLS9	Bacteria	Pseudomonadati	Pseudomonadota	Gammaproteobacteria	Moraxellales	Moraxellaceae	Acinetobacter	Acinetobacter marinus	1
A0A1Z9YY65	Bacteria	Pseudomonadati	Pseudomonadota	Gammaproteobacteria	Moraxellales	Moraxellaceae	Acinetobacter	Acinetobacter populi Acinetobacter puyangensis	2
A0A151Y2S6	Bacteria	Pseudomonadati	Pseudomonadota	Gammaproteobacteria	Moraxellales	Moraxellaceae	Acinetobacter	Acinetobacter pragensis	1
A0A1E7R535	Bacteria	Pseudomonadati	Pseudomonadota	Gammaproteobacteria	Moraxellales	Moraxellaceae	Acinetobacter	Acinetobacter qingfengensis	1
A0A6G8RVD8	Bacteria	Pseudomonadati	Pseudomonadota	Gammaproteobacteria	Moraxellales	Moraxellaceae	Acinetobacter	Acinetobacter shaoyimingii	1
A0A062C2W9	Bacteria	Pseudomonadati	Pseudomonadota	Gammaproteobacteria	Moraxellales	Moraxellaceae	Acinetobacter	Acinetobacter sp. 263903-1 Acinetobacter schindleri Acinetobacter lwoffii Acinetobacter radioresistens Acinetobacter sp. RG5 Acinetobacter schindleri NIPH 900 Acinetobacter schindleri CIP 107287 Acinetobacter variabilis Acinetobacter sp. CIP 102136	9
A0A009YKQ8	Bacteria	Pseudomonadati	Pseudomonadota	Gammaproteobacteria	Moraxellales	Moraxellaceae	Acinetobacter	Acinetobacter sp. 479375 Acinetobacter guerrae Acinetobacter ursingii	3
A0A2L0HQN9	Bacteria	Pseudomonadati	Pseudomonadota	Gammaproteobacteria	Moraxellales	Moraxellaceae	Acinetobacter	Acinetobacter sp. ACNIH2 Acinetobacter sp. ANC 4910 Acinetobacter sp. ANC 4178 Acinetobacter sp. ANC 4173 Acinetobacter tandoii Acinetobacter tandoii DSM 14970 = CIP 107469	6
A0A0M3AA08	Bacteria	Pseudomonadati	Pseudomonadota	Gammaproteobacteria	Moraxellales	Moraxellaceae	Acinetobacter	Acinetobacter sp. AG1 Acinetobacter sp. 39-4 Acinetobacter ursingii Acinetobacter sp. TR3	4
A0A241W522	Bacteria	Pseudomonadati	Pseudomonadota	Gammaproteobacteria	Moraxellales	Moraxellaceae	Acinetobacter	Acinetobacter sp. ANC 3813 Acinetobacter bouvetii	2
N9LMP7	Bacteria	Pseudomonadati	Pseudomonadota	Gammaproteobacteria	Moraxellales	Moraxellaceae	Acinetobacter	Acinetobacter sp. ANC 3929 Acinetobacter sp. NIPH 2100 Acinetobacter genomosp. 15BJ	3
A0AA42NVV1	Bacteria	Pseudomonadati	Pseudomonadota	Gammaproteobacteria	Moraxellales	Moraxellaceae	Acinetobacter	Acinetobacter sp. GD03983 Acinetobacter parvus DSM 16617 = CIP 108168 Acinetobacter sp. CIP 102159 Acinetobacter sp. CIP 102082 Acinetobacter sp. CIP 102129 Acinetobacter sp. CIP 102529 Acinetobacter sp. CIP 102143	7
A0A0A3W4K4	Bacteria	Pseudomonadati	Pseudomonadota	Gammaproteobacteria	Moraxellales	Moraxellaceae	Acinetobacter	Acinetobacter sp. HR7 Acinetobacter sp. ANC 3903 Acinetobacter sp. ANC 4218 Acinetobacter terrae Acinetobacter sp. A1-4-2	5
A0A172YSX2	Bacteria	Pseudomonadati	Pseudomonadota	Gammaproteobacteria	Moraxellales	Moraxellaceae	Acinetobacter	Acinetobacter sp. NCu2D-2	1
A0A031LYI0	Bacteria	Pseudomonadati	Pseudomonadota	Gammaproteobacteria	Moraxellales	Moraxellaceae	Acinetobacter	Acinetobacter sp. Ver3 Acinetobacter sp. DSM 11652	2
A0A7S6W366	Bacteria	Pseudomonadati	Pseudomonadota	Gammaproteobacteria	Moraxellales	Moraxellaceae	Acinetobacter	Acinetobacter sp. YH12138	1
A0A241VJ48	Bacteria	Pseudomonadati	Pseudomonadota	Gammaproteobacteria	Moraxellales	Moraxellaceae	Acinetobacter	Acinetobacter terrae Acinetobacter sp. ANC 4862 Acinetobacter sp. ANC 5414 Acinetobacter sp. ANC 5378 Acinetobacter terrestris	5
A0A7T7WFZ0	Bacteria	Pseudomonadati	Pseudomonadota	Gammaproteobacteria	Moraxellales	Moraxellaceae	Acinetobacter	Acinetobacter variabilis	1
A0A150HRH8	Bacteria	Pseudomonadati	Pseudomonadota	Gammaproteobacteria	Moraxellales	Moraxellaceae	Acinetobacter	Acinetobacter venetianus Acinetobacter sp. Acinetobacter sp. NBRC 100985 Acinetobacter venetianus RAG-1 = CIP 110063 Acinetobacter sp. COS3	5
A0A4Q7ANC9	Bacteria	Pseudomonadati	Pseudomonadota	Gammaproteobacteria	Moraxellales	Moraxellaceae	Acinetobacter	Acinetobacter wuhouensis Acinetobacter gerneri	2
A0A1S8CXT3	Bacteria	Pseudomonadati	Pseudomonadota	Gammaproteobacteria	Moraxellales	Moraxellaceae	Alkanindiges	Alkanindiges hydrocarboniclasticus	1
A0A345P7A3	Bacteria	Pseudomonadati	Pseudomonadota	Gammaproteobacteria	Moraxellales	Moraxellaceae	Aquirhabdus	Aquirhabdus parva	1
A0A924V2X3	Bacteria	Pseudomonadati	Pseudomonadota	Gammaproteobacteria	Moraxellales	Moraxellaceae	unclassified Moraxellaceae	Moraxellaceae bacterium	1
A0A4U0GIC0	Bacteria	Pseudomonadati	Pseudomonadota	Gammaproteobacteria	Nevskiales	Nevskiaceae	Sinimarinibacterium	Sinimarinibacterium sp. CAU 1509	1
A0A2G2JMV8	Bacteria	Pseudomonadati	Pseudomonadota	Gammaproteobacteria	Oceanospirillales	Oceanospirillaceae	Oceanobacter	Oceanobacter sp.	1
A0A9X3EGI2	Bacteria	Pseudomonadati	Pseudomonadota	Gammaproteobacteria	Oceanospirillales	Oceanospirillaceae	Parathalassolituus	Parathalassolituus penaei	1
A0A160TCF1	Bacteria	Pseudomonadati	Pseudomonadota	Gammaproteobacteria	Oceanospirillales	Oceanospirillaceae	Thalassolituus	Thalassolituus oleivorans MIL-1	1
A0A1N7MWJ1	Bacteria	Pseudomonadati	Pseudomonadota	Gammaproteobacteria	Oceanospirillales	Oceanospirillaceae	Thalassolituus unclassified Oceanospirillaceae	Thalassolituus maritimus Oceanospirillaceae bacterium	2
A0A2D8ADC2	Bacteria	Pseudomonadati	Pseudomonadota	Gammaproteobacteria	Oceanospirillales	Oceanospirillaceae	Thalassolituus unclassified Oceanospirillaceae	Thalassolituus sp. Oceanospirillaceae bacterium	2
A0A2D5PFV4	Bacteria	Pseudomonadati	Pseudomonadota	Gammaproteobacteria	Oceanospirillales	Oceanospirillaceae	unclassified Oceanospirillaceae	Oceanospirillaceae bacterium	1
A0A4P7P104	Bacteria	Pseudomonadati	Pseudomonadota	Gammaproteobacteria	Thiotrichales	Piscirickettsiaceae	Hydrogenovibrio	Hydrogenovibrio crunogenus Hydrogenovibrio crunogenus XCL-2	2
A0A066ZX05	Bacteria	Pseudomonadati	Pseudomonadota	Gammaproteobacteria	Thiotrichales	Piscirickettsiaceae	Hydrogenovibrio	Hydrogenovibrio marinus Hydrogenovibrio sp. JE_KL2	2
A0A4P9K4P6	Bacteria	Pseudomonadati	Pseudomonadota	Gammaproteobacteria	Thiotrichales	Piscirickettsiaceae	Thiomicrorhabdus	Thiomicrorhabdus sediminis	1
A0A7D4TDG0	Bacteria	Pseudomonadati	Pseudomonadota	Gammaproteobacteria	Thiotrichales	Piscirickettsiaceae	Thiomicrorhabdus	Thiomicrorhabdus xiamenensis	1
A0A0X3TAV5	Bacteria	Pseudomonadati	Pseudomonadota	Gammaproteobacteria	Thiotrichales	Piscirickettsiaceae	Thiomicrospira	Thiomicrospira sp. WB1	1
A0A0X3TIR1	Bacteria	Pseudomonadati	Pseudomonadota	Gammaproteobacteria	Thiotrichales	Piscirickettsiaceae	Thiomicrospira Hydrogenovibrio	Thiomicrospira sp. XS5 Thiomicrospira sp. S5 Hydrogenovibrio thermophilus	3
A0A1J5IL69	Bacteria	Pseudomonadati	Pseudomonadota	Gammaproteobacteria	Thiotrichales	Piscirickettsiaceae	Thiomicrospira Hydrogenovibrio unclassified Piscirickettsiaceae	Thiomicrospira sp. CG2_30_44_34 Hydrogenovibrio sp. SC-1 Piscirickettsiaceae bacterium CG_4_10_14_3_um_filt	3
A0A6F8PP97	Bacteria	Pseudomonadati	Pseudomonadota	Gammaproteobacteria	Thiotrichales	Piscirickettsiaceae	Thiosulfativibrio	Thiosulfativibrio zosterae	1
A0A8T7DKW5	Bacteria	Pseudomonadati	Pseudomonadota	Gammaproteobacteria	unclassified Gammaproteobacter	NA	NA	Gammaproteobacteria bacterium	1
A0A947VDK3	Bacteria	Pseudomonadati	Pseudomonadota	Gammaproteobacteria	unclassified Gammaproteobacter	NA	NA	Gammaproteobacteria bacterium	1
A0A258S840	Bacteria	Pseudomonadati	Pseudomonadota	Gammaproteobacteria	unclassified Gammaproteobacter Chromatiales	NA_x000D_Halothiobacillaceae	NA_x000D_Halothiobacillus	Gammaproteobacteria bacterium 28-57-27 Halothiobacillus neapolitanus c2	2
A0A7X4LKJ4	Bacteria	Pseudomonadati	Pseudomonadota	Gammaproteobacteria	Vibrionales	Vibrionaceae	Vibrio	Vibrio eleionomae	1
A0A9D6KPN0	Bacteria	Pseudomonadati	Pseudomonadota	Hydrogenophilia	Hydrogenophilales	unclassified Hydrogenophi	NA	Hydrogenophilales bacterium	1
A0A259FME5	Bacteria	Pseudomonadati	Pseudomonadota	Hydrogenophilia	Hydrogenophilales	unclassified Hydrogenophi	NA	Hydrogenophilales bacterium 17-64-34	1
A0A258TQ39	Bacteria	Pseudomonadati	Pseudomonadota	Hydrogenophilia	Hydrogenophilales	unclassified Hydrogenophi	NA	Hydrogenophilales bacterium 28-61-23	1
A0A259F5X6	Bacteria	Pseudomonadati	Pseudomonadota	Hydrogenophilia_x000D_Gammaproteobacteria	Hydrogenophilales_x000D_unclassified Gammaproteobacter	unclassified Hydrogenophi_x000D_NA	NA	Hydrogenophilales bacterium 17-64-65 Gammaproteobacteria bacterium	2
A0A7Y3NHP3	Bacteria	Pseudomonadati	Spirochaetota	Spirochaetia	Spirochaetales	unclassified Spirochaetal	NA	Spirochaetales bacterium	1
A0A399I838	Bacteria	Pseudomonadati	Thermodesulfobacteriota	Desulfuromonadia	Geobacterales	Geobacteraceae	Geobacter	Geobacter sp.	1
A0A290QBY1	Bacteria	Pseudomonadati	Verrucomicrobiota	Opitutia	Opitutales	Opitutaceae	Nibricoccus	Nibricoccus aquaticus	1
A0A556QKG2	Bacteria	Pseudomonadati	Verrucomicrobiota	Opitutia	Opitutales	Opitutaceae	Rariglobus	Rariglobus hedericola	1
A0AAE9ZTJ2	Bacteria	Pseudomonadati	Verrucomicrobiota	Opitutia	Opitutales	Opitutaceae	Synoicihabitans	Synoicihabitans lomoniglobus	1
A0A178IL10	Bacteria	Pseudomonadati	Verrucomicrobiota	Opitutia	Opitutales	Opitutaceae	Termitidicoccus	Termitidicoccus mucosus	1
A0A936EI88	Bacteria	Pseudomonadati	Verrucomicrobiota	Opitutia	Opitutales	Opitutaceae	unclassified Opitutaceae	Opitutaceae bacterium	1
A0A2T6DX15	Bacteria	Pseudomonadati	Verrucomicrobiota	Opitutia	Opitutales	Opitutaceae	unclassified Opitutaceae	Opitutaceae bacterium EW11	1
I6B3Q3	Bacteria	Pseudomonadati	Verrucomicrobiota	Opitutia	Opitutales	Opitutaceae	unclassified Opitutaceae	Opitutaceae bacterium TAV1 Opitutaceae bacterium TAV5	2
D5ELG0	Bacteria	Pseudomonadati	Verrucomicrobiota	Opitutia	Puniceicoccales	Coraliomargaritaceae	Coraliomargarita	Coraliomargarita akajimensis DSM 45221	1
A0A972YJF4	Bacteria	Pseudomonadati	Verrucomicrobiota	Opitutia	Puniceicoccales	Coraliomargaritaceae	Coraliomargarita	Coraliomargarita sp.	1
A0A7X1B9K2	Bacteria	Pseudomonadati	Verrucomicrobiota	Opitutia	Puniceicoccales	Pelagicoccaceae	Pelagicoccus	Pelagicoccus albus	1
A0A927F9B2	Bacteria	Pseudomonadati	Verrucomicrobiota	Opitutia	Puniceicoccales	Pelagicoccaceae	Pelagicoccus	Pelagicoccus enzymogenes	1
A0A934S1F5	Bacteria	Pseudomonadati	Verrucomicrobiota	Opitutia	Puniceicoccales	Pelagicoccaceae	Pelagicoccus	Pelagicoccus mobilis	1
A0A7X1AYT0	Bacteria	Pseudomonadati	Verrucomicrobiota	Opitutia	Puniceicoccales	Puniceicoccaceae	Puniceicoccus	Puniceicoccus vermicola	1
A0A6N2CQ90	Bacteria	Pseudomonadati	Verrucomicrobiota	Opitutia	Puniceicoccales	Puniceicoccaceae	unclassified Puniceicoccaceae	Puniceicoccaceae bacterium	1
A0A2E9INF6	Bacteria	Pseudomonadati	Verrucomicrobiota	Opitutia	Puniceicoccales	Puniceicoccaceae	unclassified Puniceicoccaceae	Puniceicoccaceae bacterium	1
A0A6N6Z9R5	Bacteria	Pseudomonadati	Verrucomicrobiota	Opitutia	Puniceicoccales	Puniceicoccaceae	unclassified Puniceicoccaceae	Puniceicoccaceae bacterium 5H	1
B9XA69	Bacteria	Pseudomonadati	Verrucomicrobiota	Pedosphaerae	Pedosphaerales	Pedosphaeraceae	Pedosphaera	Pedosphaera parvula Ellin514	1
A0A7V2CVX4	Bacteria	Pseudomonadati	Verrucomicrobiota	Spartobacteria	Chthoniobacterales	unclassified Chthoniobact	NA	Chthoniobacterales bacterium	1
A0A0E3UHB6	Bacteria	Pseudomonadati	Verrucomicrobiota	unclassified Verrucomicro	NA	NA	NA	Verrucomicrobia bacterium IMCC26134	1
A0A4P6PGM8	Bacteria	Pseudomonadati	Verrucomicrobiota	unclassified Verrucomicro	NA	NA	NA	Verrucomicrobia bacterium S94	1
A0A9E3IJP6	Bacteria	Pseudomonadati	Verrucomicrobiota	unclassified Verrucomicro	NA	NA	NA	Verrucomicrobiota bacterium	1
A0A9E3G5W1	Bacteria	Pseudomonadati	Verrucomicrobiota	unclassified Verrucomicro	NA	NA	NA	Verrucomicrobiota bacterium	1
A0A960WN18	Bacteria	Pseudomonadati	Verrucomicrobiota	Verrucomicrobiia	unclassified Verrucomicrobiia	NA	NA	Verrucomicrobiia bacterium	1
A0A961FNW2	Bacteria	Pseudomonadati	Verrucomicrobiota	Verrucomicrobiia	unclassified Verrucomicrobiia	NA	NA	Verrucomicrobiia bacterium	1
A0A961G2E5	Bacteria	Pseudomonadati	Verrucomicrobiota	Verrucomicrobiia	unclassified Verrucomicrobiia	NA	NA	Verrucomicrobiia bacterium	1
A0A960LGY7	Bacteria	Pseudomonadati	Verrucomicrobiota	Verrucomicrobiia	unclassified Verrucomicrobiia	NA	NA	Verrucomicrobiia bacterium	1
A0A960T0S1	Bacteria	Pseudomonadati	Verrucomicrobiota	Verrucomicrobiia	unclassified Verrucomicrobiia	NA	NA	Verrucomicrobiia bacterium	1
B5JR54	Bacteria	Pseudomonadati	Verrucomicrobiota	Verrucomicrobiia	unclassified Verrucomicrobiia	NA	NA	Verrucomicrobiia bacterium DG1235	1
A0A926B8L5	Bacteria	Pseudomonadati	Verrucomicrobiota	Verrucomicrobiia	Verrucomicrobiales	unclassified Verrucomicro	NA	Verrucomicrobiales bacterium	1
A0A832HB85	Bacteria	Pseudomonadati	Verrucomicrobiota	Verrucomicrobiia	Verrucomicrobiales	unclassified Verrucomicro	NA	Verrucomicrobiales bacterium	1
A0A925NSC0	Bacteria	Pseudomonadati	Verrucomicrobiota	Verrucomicrobiia	Verrucomicrobiales	unclassified Verrucomicro	NA	Verrucomicrobiales bacterium	1
A0A2E0R0W4	Bacteria	Pseudomonadati	Verrucomicrobiota	Verrucomicrobiia	Verrucomicrobiales	unclassified Verrucomicro	NA	Verrucomicrobiales bacterium	1
A0A840V5N9	Bacteria	Pseudomonadati	Verrucomicrobiota	Verrucomicrobiia	Verrucomicrobiales	Verrucomicrobiaceae	Haloferula	Haloferula luteola	1
A0A858RE92	Bacteria	Pseudomonadati	Verrucomicrobiota	Verrucomicrobiia	Verrucomicrobiales	Verrucomicrobiaceae	Luteolibacter	Luteolibacter luteus	1
A0A934R4J4	Bacteria	Pseudomonadati	Verrucomicrobiota	Verrucomicrobiia	Verrucomicrobiales	Verrucomicrobiaceae	Luteolibacter	Luteolibacter yonseiensis	1
A0A8J7MEV3	Bacteria	Pseudomonadati	Verrucomicrobiota	Verrucomicrobiia	Verrucomicrobiales	Verrucomicrobiaceae	Persicirhabdus	Persicirhabdus sediminis	1
A0A5R8KCF4	Bacteria	Pseudomonadati	Verrucomicrobiota	Verrucomicrobiia	Verrucomicrobiales	Verrucomicrobiaceae	Phragmitibacter	Phragmitibacter flavus	1
A0A1T4YIA6	Bacteria	Pseudomonadati	Verrucomicrobiota	Verrucomicrobiia	Verrucomicrobiales	Verrucomicrobiaceae	Prosthecobacter	Prosthecobacter debontii	1
A0A4R7RPF5	Bacteria	Pseudomonadati	Verrucomicrobiota	Verrucomicrobiia	Verrucomicrobiales	Verrucomicrobiaceae	Prosthecobacter	Prosthecobacter fusiformis	1
A0A918TUL1	Bacteria	Pseudomonadati	Verrucomicrobiota	Verrucomicrobiia	Verrucomicrobiales	Verrucomicrobiaceae	Roseibacillus	Roseibacillus persicicus	1
A0A366HVR0	Bacteria	Pseudomonadati	Verrucomicrobiota	Verrucomicrobiia	Verrucomicrobiales	Verrucomicrobiaceae	Roseimicrobium	Roseimicrobium gellanilyticum	1
A0A6G6K1E7	Bacteria	Pseudomonadati	Verrucomicrobiota	Verrucomicrobiia	Verrucomicrobiales	Verrucomicrobiaceae	Roseimicrobium	Roseimicrobium sp. ORNL1	1
A0A4V1SA81	Bacteria	Pseudomonadati	Verrucomicrobiota	Verrucomicrobiia	Verrucomicrobiales	Verrucomicrobiaceae	unclassified Verrucomicrobiaceae	Verrucomicrobiaceae bacterium	1
A0A4Q3ANU4	Bacteria	Pseudomonadati	Verrucomicrobiota	Verrucomicrobiia	Verrucomicrobiales	Verrucomicrobiaceae	unclassified Verrucomicrobiaceae	Verrucomicrobiaceae bacterium	1
A0A4Q2X5H4	Bacteria	Pseudomonadati	Verrucomicrobiota	Verrucomicrobiia	Verrucomicrobiales	Verrucomicrobiaceae	unclassified Verrucomicrobiaceae	Verrucomicrobiaceae bacterium	1
A0A4Q2X7V5	Bacteria	Pseudomonadati	Verrucomicrobiota	Verrucomicrobiia	Verrucomicrobiales	Verrucomicrobiaceae Akkermansiaceae	unclassified Verrucomicrobiaceae unclassified Akkermansiaceae	Verrucomicrobiaceae bacterium Akkermansiaceae bacterium	2
A0A6N4X3V6	Bacteria	Pseudomonadati	Verrucomicrobiota	Verrucomicrobiota incerta	NA	NA	Lentimonas	Lentimonas sp. CC11	1
								SUMME	416
