# Supplementary material
Source: Research Square preprint supplement (doi:10.21203/rs.3.rs-10127364/v1)
Supplement: Supplementary file 2 [file 56c73d8f1f362330eb2979e4.xlsx]

## Sheet: Figure 2
A								B,C								D
									+ Gd			-Gd
								C. cellasea	0.0507703	0.012448	-0.00908802	0.258384	0.316617	0.357652		Agmatine	0.101063	A1	DM-Gd	0.10279	A7
								S. griseus	0.17786	0.190477	0.135131	0.329353	0.267275	0.368762			0.0764572	B1		0.108594	B7
																	0.111732	C1		0.125004	C7
																	0.133599	D1		0.152687	D7
																	0.118676	E1		0.143288	E7
																Creatinine	0.106532	A2	Gd-butyrat	0.108005	A8
																	0.139546	B2		0.117491	B8
																	0.125623	C2		0.118067	C8
																	0.120686	D2		0.146204	D8
																	0.183209	E2		0.147837	E8
																Creatine	0.109243	A3	Gd-prop	0.0839604	A9
																	0.101516	B3		0.111116	B9
																	0.134915	C3		0.122971	C9
																	0.148682	D3		0.167712	D9
																	0.124136	E3		0.138661	E9
																Me-Gd	0.0465877	A4	Urea	0.0930056	A10
																	0.0429213	B4		0.10948	B10
																	0.0477575	C4		0.112803	C10
																	0.0439305	D4		0.130916	D10
																	0.0469123	E4		0.132088	E10
																Canavanine	0.117283	A5	Guanidine	0.00434479	F1
																	0.113479	B5		0.0127404	F2
																	0.103198	C5		0.0206431	F3
																	0.133318	D5		0.0207824	F4
																	0.118715	E5		0.038276	F5
																Homo-Arg	0.0918169	A6	-	0.136484	F6
																	0.110669	B6		0.145735	F7
																	0.117911	C6		0.11599	F8
																	0.159767	D6		0.133359	F9
																	0.136993	E6		0.124646	F10
																				no GdnR	G1-12
E																														F										G
t [s]	0.64 nM	Fitted 0.64 nM	0.94 nM	Fitted 0.94 nM	1.29 nM	Fitted 1.29 nM	1.88 nM	Fitted 1.88 nM	2.58 nM	Fitted 2.58 nM	3.75 nM	Fitted 3.75 nM	5.16 nM	Fitted 5.16 nM	0.64 nM	Fitted 0.64 nM	0.94 nM	Fitted 0.94 nM	1.29 nM	Fitted 1.29 nM	1.88 nM	Fitted 1.88 nM	2.58 nM	Fitted 2.58 nM	3.75 nM	Fitted 3.75 nM	5.16 nM	Fitted 5.16 nM		t [s]	Protein + 1 mM Gd	Protein + RB	Protein + 1 mM Urea	Protein w/ 1mM Gd + RB	Protein + 1 mM Gd	Protein + RB	Protein + 1 mM Urea	Protein w/ 1mM Gd + RB		Gd [mM]	+ GdnR			- GdnR
0.0479981	-0.184204	-0.3815	-0.0467529	-0.2506	-0.005	-1.073	0.191284	-0.4542	0.293579	-1.77	0.710815	1.871	0.838989	4.442	-0.298218	-0.6252	-0.194458	-0.6072	0.0733643	-1.153	-0.0858154	-0.809933	0.143433	-2.051	0.266235	0.1717	0.700806	3.584		1	0	0	0	0	0	0	0	0		0,01	0.0180717	0.0204467	0.0410731	0.728596	0.776605	0.832966
0.148004	-0.173442	-0.379082	-0.0699267	-0.24473	0.0257764	-1.06536	0.203735	-0.439769	0.288472	-1.74932	0.699116	1.90328	0.880757	4.48647	-0.349468	-0.623103	-0.181743	-0.602092	0.0167236	-1.14583	-0.0994873	-0.796067	0.184692	-2.03097	0.211792	0.203542	0.65564	3.62814		2	-0.05	-0.01	-0.01	0.02	0.01	0.04	0	0.07		0,02	0.0340446	0.018057	0.00895108	0.758083	0.811114	0.74426
0.248003	-0.181014	-0.376664	-0.122908	-0.23886	-0.013289	-1.05771	0.211809	-0.425339	0.294084	-1.72865	0.708879	1.93556	0.905412	4.53094	-0.387068	-0.621007	-0.205184	-0.596986	-0.0391679	-1.13865	-0.126221	-0.782203	0.180559	-2.01094	0.161987	0.235381	0.632707	3.67228		3	-0.05	-0.01	0	0	0.01	0.05	0.01	0.08		0,04	0	0.00703104	0.0085588	0.749111	0.776638	0.740365
0.348001	-0.181379	-0.374246	-0.109358	-0.232992	-0.0427074	-1.05007	0.167253	-0.410911	0.289324	-1.70797	0.75197	1.96784	0.909197	4.57539	-0.413069	-0.618911	-0.283918	-0.59188	-0.0549145	-1.13148	-0.120012	-0.76834	0.143328	-1.99091	0.138201	0.267219	0.64992	3.71641		4	-0.05	-0.04	0	-0.01	0.01	0.05	0.01	0.12		0,08	0.0539024	0.0416517	0.0281684	0.741071	0.780384	0.814768
0.448	-0.130005	-0.371829	-0.067749	-0.227123	-0.0267334	-1.04243	0.11438	-0.396484	0.26062	-1.6873	0.738159	2.00011	0.909302	4.61985	-0.405396	-0.616815	-0.27063	-0.586775	-0.0897217	-1.12431	-0.137085	-0.754477	0.140503	-1.97089	0.213257	0.299051	0.734253	3.76053		5	-0.03	-0.04	-0.01	0	0.01	0.05	0.01	0.13		0,16	0.0634598	0.0729255	0.0242659	0.744704	0.706256	0.760408
0.547998	-0.148804	-0.369413	-0.0496826	-0.221256	-0.0643311	-1.03479	0.085083	-0.382058	0.22522	-1.66663	0.687622	2.03238	0.916626	4.66429	-0.412476	-0.61472	-0.24353	-0.58167	-0.145874	-1.11714	-0.166016	-0.740618	0.150757	-1.95087	0.254028	0.33088	0.789917	3.80465		6	-0.02	-0.03	0	-0.01	0	0.05	0.01	0.14		0,31	0.122323	0.0650811	0.0375131	0.669971	0.613677	0.78428
0.648004	-0.146718	-0.366996	-0.0471082	-0.215388	-0.109852	-1.02715	0.139893	-0.367634	0.203624	-1.64596	0.681896	2.06465	0.9734	4.70874	-0.437245	-0.612625	-0.256581	-0.576566	-0.239014	-1.10997	-0.197998	-0.726759	0.143799	-1.93085	0.280762	0.362706	0.83252	3.84876		7	-0.01	-0.02	-0.01	-0.02	0.01	0.05	0.02	0.15		0,63	0.151688	0.0378295	0.0963095	0.83923	0.504593	0.855
0.748003	-0.13866	-0.36458	-0.0522342	-0.209522	-0.11742	-1.01951	0.187756	-0.35321	0.202404	-1.6253	0.670178	2.09691	0.964612	4.75318	-0.478748	-0.61053	-0.282215	-0.571462	-0.356433	-1.10281	-0.201782	-0.712902	0.0637326	-1.91083	0.288818	0.394529	0.857678	3.89287		8	-0.01	-0.04	0	-0.02	0.02	0.07	0.03	0.16		1,25	0.150663	0.15354	0.108487	0.812598	0.85097	0.803032
0.848001	-0.0836072	-0.362164	-0.0377088	-0.203656	-0.0801892	-1.01188	0.211071	-0.338788	0.248912	-1.60463	0.768444	2.12917	1.00697	4.79761	-0.478627	-0.608436	-0.319691	-0.56636	-0.368763	-1.09564	-0.214977	-0.699047	0.0714221	-1.89082	0.298717	0.426351	0.922252	3.93697		9	-0.02	-0.03	0	-0.02	0.02	0.06	0.04	0.15		2,5	0.261566	0.234954	0.207851	0.800118	0.811136	0.936249
0.948	-0.0477295	-0.359749	-0.0509033	-0.197791	-0.0726318	-1.00424	0.257202	-0.324368	0.27063	-1.58397	0.828247	2.16143	1.08093	4.84203	-0.455444	-0.606342	-0.36853	-0.561258	-0.349243	-1.08848	-0.232666	-0.685192	0.13269	-1.8708	0.309204	0.458167	0.960327	3.98107		10	-0.02	-0.02	0	-0.02	0.02	0.06	0.05	0.14		5	0.373582	0.380439	0.393816	0.954267	1.01659	0.949914
1.048	-0.00146	-0.357334	-0.0112305	-0.191926	-0.0336914	-0.996607	0.304688	-0.309949	0.285889	-1.56331	0.893799	2.19369	1.15625	4.88645	-0.433105	-0.604249	-0.369873	-0.556157	-0.327881	-1.08131	-0.250366	-0.671339	0.190674	-1.85079	0.337402	0.48998	1.00098	4.02516		11	-0.02	0	0	-0.03	0.02	0.06	0.05	0.13		10	0.536632	0.605545	0.600351	0.988742	1.01125	1.00001
1.148	0.0120907	-0.35492	0.0384579	-0.186061	0.00745	-0.988973	0.30896	-0.295532	0.325079	-1.54265	0.945929	2.22594	1.21033	4.93087	-0.417841	-0.602155	-0.325556	-0.551056	-0.30603	-1.07415	-0.229858	-0.657488	0.188843	-1.83079	0.38147	0.521789	1.05237	4.06924		12	-0.02	-0.01	-0.01	-0.02	0.03	0.05	0.05	0.13
1.248	-0.00207	-0.352505	0.0347962	-0.180197	-0.0103698	-0.981341	0.277228	-0.281114	0.337775	-1.522	0.946173	2.25819	1.24329	4.97528	-0.443231	-0.600063	-0.317743	-0.545956	-0.337762	-1.06699	-0.208008	-0.643639	0.164923	-1.81078	0.392456	0.553596	1.07142	4.11332		13	-0.02	-0.02	-0.02	-0.01	0.03	0.05	0.05	0.12
1.348	-0.0109816	-0.350092	0.0302782	-0.174334	0.00196	-0.97371	0.266606	-0.266699	0.343755	-1.50135	0.94727	2.29043	1.25635	5.01968	-0.493159	-0.59797	-0.348872	-0.540856	-0.36523	-1.05983	-0.215337	-0.629791	0.159917	-1.79078	0.396245	0.585401	1.10035	4.15739		14	0	0	-0.02	-0.01	0.02	0.06	0.05	0.12
1.448	-0.0161133	-0.347678	0.0153809	-0.168472	-0.000488	-0.966081	0.229736	-0.252285	0.317139	-1.4807	0.937988	2.32268	1.26709	5.06408	-0.532715	-0.595878	-0.363037	-0.535758	-0.400635	-1.05267	-0.208984	-0.615943	0.1604	-1.77078	0.408447	0.617201	1.1106	4.20146		15	0	0	-0.01	-0.02	0.02	0.07	0.04	0.13
1.548	-0.0466309	-0.345265	0.0175781	-0.16261	-0.0214844	-0.958452	0.243652	-0.237873	0.305664	-1.46005	0.938477	2.35492	1.27783	5.10847	-0.573975	-0.593787	-0.364014	-0.53066	-0.398193	-1.04551	-0.174927	-0.602098	0.163086	-1.75078	0.426514	0.648998	1.11548	4.24552		16	0	0.02	0	-0.02	0.01	0.07	0.03	0.12
1.648	-0.0338087	-0.342852	0.0206347	-0.156748	0.000127	-0.950824	0.271851	-0.223462	0.290898	-1.4394	0.984014	2.38716	1.32703	5.15286	-0.591426	-0.591695	-0.365108	-0.525562	-0.393433	-1.03836	-0.147461	-0.588255	0.188843	-1.73078	0.454468	0.680791	1.12537	4.28957		17	-0.01	0.01	0.01	-0.02	0.01	0.08	0.02	0.12
1.748	-0.0380826	-0.34044	0.0400424	-0.150887	0.021976	-0.943197	0.283939	-0.209051	0.333499	-1.41875	1.0044	2.41939	1.40772	5.19724	-0.563962	-0.589604	-0.363278	-0.520465	-0.400631	-1.0312	-0.135498	-0.574413	0.193607	-1.71079	0.513184	0.712582	1.16797	4.33362		18	0	0.02	0.01	-0.03	0.01	0.09	0.03	0.1
1.848	-0.0451632	-0.338028	0.0520048	-0.145027	0.0305204	-0.935572	0.303714	-0.194642	0.334231	-1.39811	1.00244	2.45162	1.46949	5.24162	-0.547849	-0.587514	-0.385739	-0.515369	-0.404294	-1.02405	-0.140262	-0.560572	0.209231	-1.6908	0.548831	0.744371	1.24219	4.37767		19	-0.01	0.03	0.02	-0.02	0	0.08	0.03	0.1
1.948	-0.0621338	-0.335617	0.0430908	-0.139167	0.0294189	-0.927948	0.287231	-0.180235	0.332642	-1.37747	1.02356	2.48385	1.48743	5.28599	-0.556763	-0.585424	-0.400513	-0.510274	-0.421753	-1.0169	-0.103516	-0.546732	0.214233	-1.67081	0.565552	0.776155	1.27893	4.4217		20	-0.01	0.03	0.04	-0.02	0	0.09	0.04	0.1
2.048	-0.0507813	-0.333206	0.0593262	-0.133308	0.0410156	-0.920325	0.296387	-0.165829	0.356934	-1.35683	1.09033	2.51607	1.53442	5.33035	-0.534912	-0.583334	-0.42041	-0.505179	-0.398438	-1.00975	-0.115479	-0.532894	0.229492	-1.65082	0.607666	0.807935	1.3584	4.46573		21	-0.01	0.05	0.03	-0.02	0.01	0.09	0.05	0.09
2.148	-0.0341778	-0.330795	0.022707	-0.127449	0.0222187	-0.912702	0.291992	-0.151424	0.350588	-1.33619	1.0918	2.5483	1.57105	5.37471	-0.545897	-0.581244	-0.444334	-0.500085	-0.39917	-1.0026	-0.107544	-0.519058	0.212891	-1.63084	0.649902	0.839712	1.3833	4.50976		22	0	0.06	0.04	-0.02	0.01	0.09	0.06	0.09
2.248	-0.0506573	-0.328384	-0.00378	-0.121591	0.0365009	-0.905081	0.296511	-0.13702	0.392946	-1.31556	1.10779	2.58051	1.61072	5.41907	-0.56848	-0.579155	-0.45056	-0.494991	-0.406126	-0.995445	-0.0904541	-0.505224	0.221804	-1.61086	0.687622	0.871486	1.42517	4.55378		23	-0.01	0.06	0.04	-0.03	0.01	0.09	0.06	0.08
2.348	-0.0648174	-0.325974	0.00354	-0.115733	0.0655537	-0.897462	0.292604	-0.122618	0.418093	-1.29493	1.14685	2.61273	1.65711	5.46341	-0.570677	-0.577066	-0.453978	-0.489899	-0.398802	-0.988298	-0.0701923	-0.49139	0.227175	-1.59088	0.709352	0.903259	1.47571	4.5978		24	-0.01	0.06	0.04	-0.03	0.01	0.1	0.05	0.08
2.448	-0.0550537	-0.323564	0.0408936	-0.109876	0.0743408	-0.889843	0.28479	-0.108217	0.459106	-1.2743	1.20544	2.64494	1.72009	5.50776	-0.54895	-0.574978	-0.448364	-0.484807	-0.380493	-0.981151	-0.0567627	-0.477558	0.247192	-1.5709	0.746704	0.935026	1.52478	4.6418		25	-0.02	0.06	0.06	-0.03	0.02	0.09	0.05	0.08
2.548	-0.0328369	-0.321155	0.0584717	-0.10402	0.0889893	-0.882225	0.322144	-0.0938181	0.498169	-1.25367	1.25427	2.67715	1.75916	5.55209	-0.533569	-0.57289	-0.432251	-0.479715	-0.388306	-0.974006	-0.0601807	-0.463727	0.253052	-1.55092	0.795288	0.96679	1.58728	4.68581		26	-0.01	0.05	0.08	-0.04	0.01	0.08	0.03	0.08
2.648	-0.0406485	-0.318746	0.060914	-0.0981637	0.114869	-0.874608	0.329956	-0.0794201	0.535768	-1.23304	1.27625	2.70936	1.7887	5.59643	-0.532592	-0.570802	-0.434447	-0.474624	-0.386597	-0.966862	-0.0825195	-0.449899	0.251099	-1.53095	0.845825	0.998551	1.63416	4.7298		27	-0.01	0.04	0.09	-0.04	0.01	0.08	0.03	0.06
2.748	-0.0356445	-0.316337	0.0712891	-0.0923085	0.110596	-0.866993	0.313721	-0.0650222	0.554688	-1.21242	1.30859	2.74156	1.82251	5.64075	-0.541992	-0.568715	-0.44458	-0.469534	-0.38501	-0.959718	-0.0769043	-0.436072	0.256592	-1.51098	0.865479	1.03031	1.69214	4.7738		28	-0.01	0.03	0.09	-0.02	0.01	0.09	0.04	0.07
2.848	-0.0537109	-0.313929	0.0620117	-0.0864539	0.10376	-0.859379	0.315186	-0.0506268	0.556152	-1.19179	1.3125	2.77376	1.84619	5.68507	-0.545654	-0.566628	-0.448975	-0.464445	-0.403076	-0.952576	-0.0914307	-0.422246	0.251709	-1.49101	0.887695	1.06207	1.729	4.81778		29	-0.01	0.02	0.09	-0.01	0.01	0.09	0.03	0.07
2.948	-0.0565186	-0.311521	0.0357666	-0.0805998	0.0992432	-0.851766	0.308228	-0.0362327	0.565063	-1.17118	1.33484	2.80596	1.87439	5.72939	-0.550659	-0.564541	-0.469604	-0.459356	-0.432983	-0.945436	-0.09375	-0.408421	0.251099	-1.47105	0.924438	1.09382	1.76135	4.86176		30	0	0.02	0.1	-0.01	0	0.09	0.04	0.07
3.048	-0.0566406	-0.309114	0.0314941	-0.0747463	0.102539	-0.844154	0.325684	-0.0218399	0.567383	-1.15056	1.37744	2.83816	1.948	5.7737	-0.562744	-0.562455	-0.466064	-0.454268	-0.4375	-0.938296	-0.0928955	-0.394598	0.246826	-1.45108	0.94165	1.12556	1.79614	4.90573		31	0	0.03	0.08	-0.01	-0.01	0.08	0.03	0.08
3.148	-0.0443125	-0.306706	0.0203848	-0.0688929	0.100219	-0.836542	0.352173	-0.00745	0.566039	-1.12994	1.42566	2.87035	2.01013	5.818	-0.542115	-0.560369	-0.447633	-0.44918	-0.426636	-0.931158	-0.0866699	-0.380777	0.252075	-1.43112	0.975708	1.15731	1.82092	4.9497		32	0	0.02	0.07	-0.02	-0.03	0.08	0.02	0.08
3.248	-0.0432129	-0.3043	-0.00806	-0.0630405	0.0808105	-0.828933	0.334961	0.00694	0.573975	-1.10933	1.43921	2.90254	2.04102	5.8623	-0.564941	-0.558284	-0.464355	-0.444093	-0.434082	-0.92402	-0.0860596	-0.366957	0.251953	-1.41116	0.999512	1.18905	1.84814	4.99366		33	-0.01	0	0.18	-0.04	-0.05	0.06	0.01	0.06
3.348	-0.0604248	-0.301893	-0.0135498	-0.0571886	0.0758057	-0.821324	0.33313	0.0213316	0.580688	-1.08871	1.46204	2.93472	2.11218	5.90659	-0.583618	-0.556198	-0.453979	-0.439007	-0.435181	-0.916884	-0.0766602	-0.353139	0.27771	-1.39121	1.03406	1.22079	1.88391	5.03762		34	-0.01	-0.02	-0.15	-0.06	-0.07	0.03	-0.03	0.05
3.448	-0.0627441	-0.299487	-0.000732	-0.0513374	0.0693359	-0.813716	0.385254	0.0357192	0.579834	-1.06811	1.47852	2.96691	2.17163	5.95088	-0.58667	-0.554114	-0.445068	-0.433922	-0.424561	-0.90975	-0.0648193	-0.339321	0.308105	-1.37125	1.06763	1.25252	1.94165	5.08157		35	-0.02	-0.05	-0.71	-0.05	-0.09	-0.01	-0.05	0.04
3.548	-0.0853271	-0.297082	-0.0130615	-0.0454867	0.0579834	-0.80611	0.41394	0.0501054	0.608032	-1.0475	1.49548	2.99908	2.23157	5.99516	-0.582153	-0.552029	-0.446411	-0.428837	-0.421509	-0.902616	-0.0411377	-0.325505	0.340698	-1.3513	1.09485	1.28426	1.98157	5.12551		36	-0.05	-0.1	-1.25	-0.06	-0.13	-0.04	-0.08	0.02
3.648	-0.0936279	-0.294676	-0.00647	-0.0396361	0.050415	-0.798504	0.415405	0.0644903	0.613892	-1.02689	1.51257	3.03126	2.2804	6.03944	-0.595825	-0.549945	-0.452026	-0.423752	-0.433228	-0.895484	-0.0196533	-0.311692	0.379028	-1.33135	1.1134	1.31598	2.02649	5.16945		37	-0.07	-0.11	-1.64	-0.14	-0.14	-0.03	-0.11	0
3.748	-0.078248	-0.292271	0.012084	-0.0337865	0.0679922	-0.7909	0.427611	0.0788749	0.639281	-1.00629	1.54382	3.06344	2.34094	6.08371	-0.589967	-0.547861	-0.444215	-0.418669	-0.433228	-0.888352	0.00464	-0.297879	0.414916	-1.31141	1.14343	1.34771	2.08923	5.21339		38	-0.06	-0.08	-2	-0.2	-0.12	-0.05	-0.12	-0.02
3.848	-0.0578623	-0.289867	0.00439	-0.0279375	0.0632315	-0.783297	0.426513	0.0932572	0.647948	-0.985687	1.57373	3.09561	2.39648	6.12797	-0.587403	-0.545778	-0.449464	-0.413586	-0.422853	-0.881222	0.0115976	-0.284068	0.437011	-1.29146	1.16699	1.37943	2.13721	5.25731		39	-0.06	-0.08	-2.24	-0.19	-0.13	-0.05	-0.11	-0.05
3.948	-0.0465088	-0.287463	0.00989	-0.0220891	0.0562744	-0.775695	0.435181	0.107638	0.668823	-0.965088	1.61584	3.12777	2.45032	6.17223	-0.59729	-0.543695	-0.465454	-0.408504	-0.411987	-0.874094	0.0356445	-0.270258	0.467407	-1.27152	1.18835	1.41115	2.16345	5.30123		40	-0.04	-0.04	-2.5	-0.16	-0.11	-0.04	-0.07	-0.05
4.048	-0.052002	-0.285059	-0.00684	-0.0162412	0.045166	-0.768094	0.449707	0.122018	0.671143	-0.944491	1.64209	3.15994	2.48438	6.21648	-0.608887	-0.541613	-0.461426	-0.403423	-0.405273	-0.866966	0.0422363	-0.25645	0.474121	-1.25158	1.20459	1.44287	2.21313	5.34515		41	-0.02	-0.02	-2.29	-0.14	-0.08	-0.04	-0.05	-0.03
4.148	-0.0571299	-0.282655	0.000731	-0.0103935	0.0478506	-0.760494	0.458008	0.136396	0.718261	-0.923894	1.7124	3.1921	2.55469	6.26073	-0.592774	-0.53953	-0.454835	-0.398341	-0.395264	-0.85984	0.0584717	-0.242644	0.51709	-1.23164	1.23193	1.47458	2.27173	5.38906		42	-0.03	-0.01	-2.45	-0.13	-0.09	-0.04	-0.06	-0.02
4.248	-0.0665283	-0.280252	0.0233154	-0.00455	0.0328369	-0.752895	0.462524	0.150774	0.742554	-0.903301	1.74084	3.22426	2.60046	6.30497	-0.611206	-0.537448	-0.462036	-0.393261	-0.39856	-0.852714	0.072998	-0.228839	0.536011	-1.21171	1.24475	1.50629	2.31433	5.43296		43	-0.03	0	-3.01	-0.12	-0.08	-0.04	-0.05	-0.01
4.348	-0.0732422	-0.277849	0.0473633	0.0013	0.0512695	-0.745297	0.498291	0.16515	0.770996	-0.882711	1.79053	3.25641	2.66968	6.34921	-0.606689	-0.535367	-0.454834	-0.388182	-0.37793	-0.84559	0.114868	-0.215036	0.548828	-1.19178	1.29395	1.53799	2.36328	5.47686		44	-0.03	0	-2.69	-0.11	-0.09	-0.04	-0.03	0
4.448	-0.0682373	-0.275447	0.0777588	0.00715	0.0501709	-0.737701	0.534546	0.179524	0.820679	-0.862122	1.83069	3.28856	2.74329	6.39344	-0.622925	-0.533286	-0.45813	-0.383103	-0.367554	-0.838467	0.125977	-0.201233	0.551147	-1.17185	1.32288	1.56969	2.44031	5.52075		45	-0.03	-0.01	-1.9	-0.1	-0.1	-0.04	-0.02	-0.01
4.548	-0.0888672	-0.273045	0.0908203	0.0129901	0.072998	-0.730106	0.543457	0.193897	0.86084	-0.841536	1.86475	3.32071	2.79688	6.43766	-0.626465	-0.531205	-0.464844	-0.378025	-0.36792	-0.831346	0.149292	-0.187433	0.556641	-1.15192	1.34131	1.60139	2.49658	5.56463		46	-0.05	-0.02	-1.82	-0.1	-0.12	-0.01	-0.01	-0.03
4.648	-0.0633545	-0.270643	0.0911865	0.018835	0.086792	-0.722511	0.575073	0.208269	0.886353	-0.82095	1.91589	3.35286	2.85583	6.48188	-0.612427	-0.529124	-0.454956	-0.372947	-0.348511	-0.824226	0.161011	-0.173634	0.573853	-1.13199	1.38806	1.63309	2.54724	5.60851		47	-0.04	0	-1.35	-0.1	-0.1	0	0	0
4.748	-0.0633545	-0.268242	0.102417	0.0246789	0.105835	-0.714918	0.594116	0.22264	0.92688	-0.800367	1.94104	3.385	2.91785	6.5261	-0.583618	-0.527044	-0.428101	-0.36787	-0.331177	-0.817106	0.181274	-0.159836	0.577759	-1.11207	1.42322	1.66478	2.60754	5.65239		48	-0.02	0.03	-0.93	-0.09	-0.09	0.01	0.05	0.02
4.848	-0.0494385	-0.265841	0.112915	0.0305223	0.132202	-0.707326	0.62439	0.23701	0.973022	-0.779787	1.99646	3.41714	2.99084	6.5703	-0.568726	-0.524965	-0.397827	-0.362794	-0.300903	-0.809988	0.203003	-0.146041	0.598511	-1.09215	1.47083	1.69647	2.66907	5.69626		49	0.01	0.04	-0.9	-0.08	-0.07	0.05	0.07	0.06
4.948	-0.0386963	-0.263441	0.144165	0.0363651	0.128784	-0.699735	0.630493	0.251377	1.00647	-0.759209	2.04724	3.44928	3.03625	6.61451	-0.572144	-0.522885	-0.393433	-0.357718	-0.283325	-0.802871	0.223267	-0.132245	0.610229	-1.07223	1.53162	1.72816	2.71033	5.74012		50	0.03	0.06	-0.95	-0.06	-0.04	0.09	0.1	0.09
5.048	-0.0343018	-0.261041	0.164917	0.0422073	0.139282	-0.692145	0.654907	0.265744	1.00354	-0.738633	2.08142	3.48141	3.09973	6.6587	-0.571167	-0.520806	-0.380737	-0.352644	-0.274292	-0.795755	0.247192	-0.118452	0.611206	-1.05231	1.56213	1.75984	2.76599	5.78397		51	0.05	0.08	-0.87	-0.02	0	0.12	0.11	0.12
5.148	-0.00525	-0.258641	0.193969	0.0480494	0.156615	-0.684556	0.680298	0.280109	1.05212	-0.718057	2.12439	3.51355	3.14685	6.7029	-0.567506	-0.518728	-0.343629	-0.347569	-0.26062	-0.788641	0.253784	-0.104661	0.648315	-1.0324	1.61267	1.79152	2.82043	5.82782		52	0.08	0.09	-0.71	0.01	0.04	0.13	0.11	0.16
5.248	0.00574	-0.256242	0.195679	0.0538904	0.163452	-0.676969	0.677368	0.294474	1.07288	-0.697485	2.16248	3.54567	3.1886	6.74708	-0.556519	-0.516649	-0.333374	-0.342495	-0.251831	-0.781527	0.276978	-0.0908711	0.666626	-1.01249	1.65662	1.82319	2.89148	5.87167		53	0.09	0.08	-0.53	0.03	0.05	0.15	0.11	0.18
5.348	0.0174541	-0.253843	0.206663	0.059731	0.183226	-0.669382	0.700315	0.308836	1.08044	-0.676915	2.203	3.5778	3.24695	6.79126	-0.539431	-0.514572	-0.290407	-0.337423	-0.238649	-0.774415	0.275637	-0.0770827	0.699827	-0.992579	1.70715	1.85487	2.95398	5.9155		54	0.1	0.08	-0.39	0.04	0.06	0.15	0.12	0.2
5.448	0.0083	-0.251444	0.203369	0.0655709	0.175781	-0.661797	0.718506	0.323197	1.08276	-0.656348	2.21582	3.60992	3.28857	6.83543	-0.55249	-0.512494	-0.285645	-0.33235	-0.231934	-0.767305	0.293945	-0.0632948	0.711914	-0.972673	1.73145	1.88653	2.98999	5.95934		55	0.1	0.08	-0.3	0.05	0.07	0.16	0.11	0.21
5.548	0.00293	-0.249046	0.211914	0.0714103	0.178467	-0.654213	0.715332	0.337557	1.10303	-0.635782	2.24585	3.64204	3.32446	6.8796	-0.541992	-0.510417	-0.267822	-0.327279	-0.235107	-0.760195	0.318115	-0.0495095	0.7146	-0.952769	1.75537	1.9182	3.02954	6.00316		56	0.1	0.08	-0.24	0.05	0.07	0.16	0.1	0.22
5.648	0.00976	-0.246648	0.228759	0.0772495	0.190917	-0.646629	0.737793	0.351916	1.12183	-0.615217	2.28564	3.67415	3.39941	6.92377	-0.529542	-0.50834	-0.235108	-0.322208	-0.232422	-0.753086	0.324951	-0.0357256	0.749023	-0.932867	1.78735	1.94986	3.07715	6.04698		57	0.11	0.1	-0.22	0.04	0.07	0.15	0.1	0.21
5.748	0.00513	-0.24425	0.237304	0.0830878	0.19995	-0.639048	0.740722	0.366274	1.1438	-0.594656	2.31201	3.70627	3.45093	6.96792	-0.534425	-0.506264	-0.245851	-0.317137	-0.225587	-0.745979	0.329224	-0.0219433	0.779052	-0.912967	1.82764	1.98152	3.12915	6.0908		58	0.11	0.12	-0.19	0.03	0.06	0.16	0.12	0.2
5.848	-0.00842	-0.241853	0.233764	0.0889255	0.215453	-0.631467	0.740844	0.38063	1.17932	-0.574096	2.34338	3.73838	3.4906	7.01207	-0.522584	-0.504187	-0.273561	-0.312068	-0.225465	-0.738873	0.354127	-0.00816	0.777221	-0.89307	1.87805	2.01318	3.18591	6.13461		59	0.11	0.12	-0.17	0.02	0.05	0.16	0.12	0.19
5.948	0.00867	-0.239456	0.235229	0.0947626	0.21521	-0.623887	0.763794	0.394984	1.18689	-0.553539	2.3822	3.77048	3.54846	7.05622	-0.515015	-0.502112	-0.242554	-0.306999	-0.206177	-0.731768	0.377318	0.00562	0.81189	-0.873175	1.91736	2.04483	3.23035	6.17841		60	0.11	0.12	-0.15	0.01	0.05	0.15	0.11	0.17
6.048	0.012084	-0.23706	0.248168	0.100599	0.222533	-0.616309	0.794555	0.409337	1.2157	-0.532984	2.41101	3.80258	3.61682	7.10036	-0.5094	-0.500036	-0.223023	-0.301931	-0.198853	-0.724664	0.393188	0.0193958	0.823363	-0.853283	1.9364	2.07648	3.28479	6.2222		61	0.1	0.12	-0.12	-0.01	0.03	0.15	0.11	0.14
6.148	0.0184317	-0.234664	0.264281	0.106436	0.228637	-0.608731	0.797485	0.423689	1.22986	-0.51243	2.46008	3.83469	3.6366	7.14449	-0.509156	-0.497961	-0.224732	-0.296863	-0.209839	-0.717562	0.422853	0.0331721	0.844604	-0.833394	1.96033	2.10812	3.33386	6.26599		62	0.1	0.11	-0.11	-0.02	0	0.13	0.1	0.14
6.248	0.0249023	-0.232268	0.268799	0.112271	0.256592	-0.601154	0.807129	0.438041	1.25952	-0.491879	2.50366	3.86678	3.70898	7.18862	-0.50293	-0.495887	-0.220703	-0.291796	-0.196045	-0.71046	0.432861	0.046947	0.872803	-0.813505	2.00342	2.13977	3.40259	6.30978		63	0.08	0.09	-0.12	-0.04	-0.02	0.12	0.07	0.14
6.348	0.0263662	-0.229873	0.270751	0.118106	0.256347	-0.593579	0.822753	0.45239	1.28296	-0.47133	2.52905	3.89888	3.76587	7.23274	-0.485353	-0.493812	-0.212647	-0.28673	-0.184571	-0.70336	0.454103	0.0607203	0.873046	-0.79362	2.04053	2.17141	3.42456	6.35356		64	0.05	0.08	-0.12	-0.07	-0.06	0.08	0.03	0.12
6.448	0.0439453	-0.227478	0.282227	0.12394	0.281738	-0.586005	0.844482	0.466738	1.3103	-0.450783	2.5874	3.93097	3.81274	7.27686	-0.483398	-0.491739	-0.206787	-0.281664	-0.184326	-0.696261	0.461059	0.0744932	0.872803	-0.773737	2.0835	2.20304	3.46729	6.39733		65	0	0.03	-0.12	-0.09	-0.1	0.05	-0.03	0.08
6.548	0.0411367	-0.225083	0.279418	0.129774	0.27893	-0.578432	0.860717	0.481085	1.32288	-0.430239	2.63538	3.96305	3.84729	7.32097	-0.495973	-0.489665	-0.211793	-0.276599	-0.173707	-0.689164	0.480225	0.0882635	0.887816	-0.753857	2.11389	2.23467	3.505	6.44109		66	-0.05	-0.07	-0.12	-0.19	-0.13	-0.01	-0.07	-0.06
6.648	0.0661612	-0.222689	0.304442	0.135607	0.286864	-0.57086	0.88208	0.49543	1.35962	-0.409695	2.67212	3.99514	3.89331	7.36508	-0.500245	-0.487592	-0.216065	-0.271534	-0.17749	-0.682067	0.502687	0.102032	0.908691	-0.733979	2.14868	2.2663	3.55981	6.48485		67	-0.14	-0.23	-0.11	-0.44	-0.21	-0.17	-0.17	-0.21
6.748	0.0673828	-0.220295	0.325195	0.14144	0.289307	-0.563289	0.910645	0.509775	1.3999	-0.389154	2.72021	4.02722	3.92798	7.40918	-0.49707	-0.485519	-0.216797	-0.266471	-0.170654	-0.674971	0.528319	0.115801	0.915771	-0.714102	2.19458	2.29793	3.60938	6.52861		68	-0.51	-0.56	-0.11	-1.06	-0.43	-0.04	0.14	-1.11
6.848	0.0791006	-0.217901	0.315917	0.147272	0.301513	-0.555719	0.930175	0.524117	1.4021	-0.368616	2.7688	4.0593	3.97266	7.45327	-0.493409	-0.483446	-0.212647	-0.261408	-0.168702	-0.667877	0.54419	0.129565	0.948974	-0.694229	2.22803	2.32955	3.66821	6.57236		69	-0.7	-0.77	-0.11	0.27	-1	-1.31	-1.3	0.37
6.94801	0.0888653	-0.215508	0.323484	0.153104	0.311277	-0.54815	0.944336	0.538459	1.42969	-0.348078	2.82617	4.09138	4.01782	7.49736	-0.481203	-0.481374	-0.210695	-0.256345	-0.168701	-0.660784	0.541014	0.143331	0.960693	-0.674359	2.25562	2.36117	3.71533	6.6161		70	-0.47	-0.64	-0.09	-0.68	-0.21	-0.57	-0.34	-0.4
7.048	0.0842271	-0.213116	0.337889	0.158934	0.31787	-0.540584	0.946775	0.5528	1.43432	-0.327546	2.84619	4.12345	4.052	7.54144	-0.486818	-0.479303	-0.229249	-0.251284	-0.179446	-0.653692	0.557374	0.157092	0.963377	-0.654489	2.2915	2.39279	3.7456	6.65984		71	-1.11	-1.15	-0.09	-1.39	-0.75	-0.93	-0.87	-1.01
7.148	0.0830069	-0.210723	0.327392	0.164765	0.315185	-0.533017	0.9729	0.567137	1.43921	-0.307012	2.88818	4.15552	4.10156	7.58552	-0.483399	-0.477231	-0.224854	-0.246223	-0.170898	-0.646602	0.577149	0.170855	0.980225	-0.634625	2.32373	2.4244	3.77734	6.70357		72	-1.2	-1.11	-0.1	-1.7	-0.83	-0.84	-0.87	-1.23
7.24799	0.0751963	-0.208331	0.329347	0.170594	0.312989	-0.525452	0.980957	0.581476	1.4585	-0.286484	2.93115	4.18758	4.16406	7.62958	-0.485595	-0.47516	-0.20703	-0.241163	-0.170654	-0.639512	0.592528	0.184616	1.00146	-0.61476	2.3374	2.45601	3.8147	6.74729		73	-0.96	-0.82	-0.11	-1.88	-0.65	-0.58	-0.62	-1.37
7.348	0.0869126	-0.20594	0.3291	0.176424	0.330321	-0.517888	1.00049	0.59581	1.45849	-0.265955	2.96802	4.21965	4.20923	7.67365	-0.485597	-0.47309	-0.222414	-0.236103	-0.171143	-0.632425	0.617067	0.198373	1.01733	-0.5949	2.37427	2.48761	3.85571	6.79101		74	-0.7	-0.62	-0.12	-2.15	-0.34	-0.53	-0.51	-1.52
7.44801	0.0880113	-0.203548	0.333861	0.182253	0.349242	-0.510324	1.01331	0.610146	1.48303	-0.245428	3.00647	4.25171	4.2489	7.71771	-0.480592	-0.471019	-0.212038	-0.231044	-0.158081	-0.625337	0.610472	0.212131	1.03381	-0.57504	2.41077	2.51921	3.90344	6.83472		75	-0.63	-0.64	-0.18	-2.51	-0.35	-0.68	-0.64	-1.78
7.548	0.0675035	-0.201157	0.337035	0.188081	0.356078	-0.502763	1.02404	0.624481	1.49597	-0.224906	3.01721	4.28376	4.30481	7.76176	-0.481569	-0.468949	-0.210573	-0.225986	-0.151004	-0.618251	0.625856	0.225885	1.06408	-0.555182	2.43127	2.55082	3.95324	6.87843		76	-0.69	-0.67	-0.22	-2.91	-0.42	-0.69	-0.66	-2.07
7.648	0.0694571	-0.198767	0.335326	0.193909	0.358031	-0.495202	1.04553	0.638811	1.50915	-0.204383	3.04651	4.31582	4.35339	7.80581	-0.491334	-0.46688	-0.216432	-0.220928	-0.153198	-0.611167	0.633546	0.23964	1.07996	-0.53533	2.4779	2.58241	4.01208	6.92213		77	-0.6	-0.56	-0.58	-3.12	-0.29	-0.55	-0.53	-2.28
7.74799	0.0771494	-0.196377	0.338868	0.199735	0.381104	-0.487643	1.06104	0.653143	1.52515	-0.183865	3.10083	4.34787	4.40845	7.84985	-0.471923	-0.464811	-0.199462	-0.215871	-0.151123	-0.604084	0.648558	0.253393	1.09326	-0.515477	2.49951	2.614	4.07227	6.96582		78	-0.38	-0.34	-0.82	-3.23	-0.05	-0.3	-0.33	-2.39
7.848	0.0880113	-0.193987	0.345824	0.205562	0.39221	-0.480084	1.08533	0.667471	1.526	-0.163346	3.12781	4.37992	4.4657	7.89389	-0.464967	-0.462742	-0.198122	-0.210814	-0.142212	-0.597002	0.645265	0.267143	1.13147	-0.495629	2.53943	2.64559	4.12634	7.00951		79	-0.09	-0.09	-0.75	-3.31	0.21	0.01	-0.05	-2.45
7.94801	0.0715322	-0.191597	0.350341	0.211388	0.404784	-0.472526	1.104	0.6818	1.55029	-0.14283	3.16357	4.41196	4.5332	7.93792	-0.464112	-0.460673	-0.191651	-0.205758	-0.133789	-0.589921	0.672729	0.280893	1.15186	-0.475781	2.56787	2.67718	4.17603	7.05319		80	0.18	0.16	-1.14	-3.35	0.49	0.31	0.26	-2.49
8.048	0.071166	-0.189208	0.354613	0.217213	0.401	-0.46497	1.12365	0.696128	1.56604	-0.122318	3.21448	4.444	4.5802	7.98194	-0.479371	-0.458605	-0.183717	-0.200704	-0.122195	-0.58284	0.692994	0.29464	1.17932	-0.455935	2.59119	2.70876	4.22864	7.09687		81	0.45	0.43	-1.44	-3.38	0.75	0.62	0.54	-2.5
8.148	0.0704336	-0.18682	0.37683	0.223038	0.409789	-0.457415	1.13074	0.710452	1.58264	-0.101806	3.2467	4.47604	4.62805	8.02596	-0.478639	-0.456537	-0.182496	-0.195649	-0.116821	-0.575762	0.701905	0.308387	1.20374	-0.436095	2.63904	2.74034	4.29822	7.14054		82	0.78	0.74	-1.34	-3.35	1.04	0.95	0.86	-2.47
8.248	0.0673838	-0.184431	0.375978	0.228861	0.422364	-0.449861	1.12939	0.724777	1.60693	-0.0812988	3.28272	4.50807	4.67188	8.06997	-0.481688	-0.45447	-0.17578	-0.190596	-0.112549	-0.568685	0.723388	0.322132	1.23193	-0.416254	2.67725	2.77191	4.36719	7.1842		83	1.25	1.16	-1.09	-3.29	1.44	1.34	1.25	-2.39
8.348	0.0654287	-0.182043	0.391845	0.234685	0.424315	-0.442308	1.15088	0.739099	1.62842	-0.0607907	3.31201	4.54011	4.70117	8.11398	-0.47754	-0.452403	-0.16797	-0.185543	-0.0986328	-0.561609	0.73047	0.335875	1.26123	-0.396418	2.71997	2.80349	4.43945	7.22786		84	1.78	1.66	-0.99	-3.16	1.92	1.8	1.69	-2.27
8.44801	0.0646958	-0.179656	0.392821	0.240509	0.444823	-0.434756	1.16357	0.753421	1.6355	-0.0402847	3.36572	4.57214	4.75903	8.15799	-0.470949	-0.450336	-0.153322	-0.18049	-0.0993652	-0.554534	0.752685	0.349617	1.28784	-0.376582	2.76392	2.83505	4.49365	7.27151		85	2.32	2.19	-1.01	-3.06	2.39	2.24	2.09	-2.2
8.548	0.0673819	-0.177269	0.383788	0.246331	0.457519	-0.427206	1.18408	0.767742	1.6499	-0.019784	3.38428	4.60416	4.8125	8.20198	-0.462159	-0.44827	-0.138917	-0.175439	-0.0966811	-0.547459	0.761598	0.363356	1.29858	-0.356748	2.81567	2.86662	4.55078	7.31516		86	2.77	2.64	-0.95	-3.04	2.78	2.57	2.41	-2.2
8.648	0.06848	-0.174882	0.396605	0.252153	0.466429	-0.419656	1.19299	0.78206	1.66662	0.000718	3.42053	4.63618	4.86047	8.24597	-0.461061	-0.446204	-0.135622	-0.170387	-0.0877686	-0.540387	0.776247	0.377096	1.32654	-0.33692	2.84411	2.89818	4.61047	7.35879		87	3.09	2.94	-0.77	-3.12	3.06	2.85	2.68	-2.27
8.748	0.0596938	-0.172495	0.405153	0.257974	0.473024	-0.412108	1.2113	0.796378	1.69299	0.0212143	3.46033	4.6682	4.90637	8.28995	-0.469847	-0.444138	-0.127074	-0.165337	-0.0731201	-0.533316	0.786986	0.390834	1.34534	-0.317091	2.87268	2.92974	4.65076	7.40243		88	3.37	3.23	-0.53	-3.19	3.35	3.14	2.91	-2.34
8.848	0.0626206	-0.170109	0.410277	0.263795	0.487914	-0.40456	1.2262	0.810693	1.71155	0.0417118	3.50842	4.70022	4.96789	8.33393	-0.46692	-0.442073	-0.108522	-0.160287	-0.0623779	-0.526246	0.785036	0.404569	1.37195	-0.297267	2.90466	2.9613	4.69446	7.44605		89	3.69	3.51	-0.27	-3.23	3.6	3.41	3.13	-2.38
8.94801	0.060668	-0.167723	0.408324	0.269615	0.478148	-0.397014	1.23206	0.825009	1.72131	0.0622071	3.52966	4.73224	4.9989	8.37791	-0.468873	-0.440008	-0.11609	-0.155238	-0.0704346	-0.519177	0.801513	0.418304	1.38538	-0.277443	2.93396	2.99285	4.74744	7.48968		90	4.05	3.8	0.01	-3.28	3.86	3.68	3.4	-2.43
9.048	0.0573721	-0.165338	0.410888	0.275434	0.482909	-0.389469	1.24072	0.839323	1.73779	0.0826973	3.5581	4.76424	5.05273	8.42187	-0.468263	-0.437944	-0.109376	-0.15019	-0.0673847	-0.512109	0.809571	0.432035	1.40552	-0.257621	2.97558	3.0244	4.79883	7.53329		91	4.43	4.13	0.3	-3.25	4.2	4.02	3.75	-2.4
9.148	0.0617661	-0.162953	0.42871	0.281254	0.484862	-0.381925	1.26221	0.853634	1.75366	0.103188	3.61474	4.79625	5.10351	8.46583	-0.456056	-0.435879	-0.10547	-0.145142	-0.0593262	-0.505043	0.824953	0.445767	1.43726	-0.237805	3.01538	3.05594	4.84985	7.5769		92	4.87	4.6	0.66	-3.19	4.64	4.45	4.18	-2.32
9.248	0.0632339	-0.160568	0.434328	0.287072	0.49463	-0.374383	1.27197	0.867945	1.77466	0.123674	3.65015	4.82825	5.15991	8.50978	-0.46411	-0.433816	-0.0981431	-0.140095	-0.0634766	-0.497977	0.831054	0.459498	1.46045	-0.217988	3.06934	3.08748	4.89258	7.62051		93	5.38	5.11	1.18	-3.1	5.08	4.9	4.65	-2.24
9.348	0.0637197	-0.158184	0.438476	0.29289	0.506347	-0.366841	1.28174	0.882254	1.80225	0.144161	3.67529	4.86026	5.21118	8.55373	-0.465821	-0.431752	-0.0878916	-0.135049	-0.0537109	-0.490913	0.844239	0.473225	1.47827	-0.198176	3.10107	3.11902	4.93359	7.6641		94	5.91	5.59	1.73	-3.03	5.52	5.25	4.98	-2.18
9.44801	0.0671387	-0.1558	0.455811	0.298708	0.523926	-0.3593	1.29736	0.896563	1.82178	0.164646	3.7085	4.89225	5.28101	8.59768	-0.458252	-0.429689	-0.0803223	-0.130003	-0.0419922	-0.48385	0.875854	0.486952	1.49756	-0.178364	3.12817	3.15055	4.98438	7.70769		95	6.32	6.01	2.21	-3	5.91	5.62	5.31	-2.18
9.548	0.0828848	-0.153417	0.471801	0.304524	0.533568	-0.351761	1.32849	0.91087	1.86853	0.185125	3.74939	4.92425	5.34582	8.64161	-0.446656	-0.427627	-0.0587168	-0.124958	-0.0360131	-0.476788	0.884645	0.500676	1.51159	-0.158554	3.1654	3.18209	5.05285	7.75128		96	6.68	6.36	2.59	-3	6.26	5.95	5.64	-2.2
9.648	0.0743403	-0.151033	0.468627	0.31034	0.548217	-0.344222	1.3512	0.925174	1.87952	0.205606	3.79529	4.95624	5.39539	8.68555	-0.443482	-0.425564	-0.0496831	-0.119913	-0.0389404	-0.469728	0.904297	0.514401	1.53552	-0.13875	3.21692	3.21362	5.08533	7.79485		97	7.07	6.69	2.86	-3.02	6.59	6.24	5.95	-2.23
9.748	0.0839849	-0.148651	0.482422	0.316155	0.562012	-0.336686	1.35498	0.939479	1.89502	0.226081	3.83276	4.98822	5.45239	8.72947	-0.43164	-0.423502	-0.0498042	-0.11487	-0.0214844	-0.462668	0.907958	0.528124	1.56323	-0.118945	3.25244	3.24514	5.1438	7.83843		98	7.42	7.03	3.1	-3.03	6.89	6.52	6.24	-2.24
9.848	0.0820298	-0.146268	0.489989	0.321971	0.554442	-0.329149	1.37646	0.953781	1.9165	0.246557	3.86401	5.02021	5.48364	8.77339	-0.439455	-0.42144	-0.0615249	-0.109827	-0.0231934	-0.45561	0.910158	0.541843	1.57666	-0.0991455	3.27197	3.27666	5.19458	7.88199		99	7.77	7.36	3.38	-3.04	7.21	6.85	6.56	-2.24
9.94801	0.0820303	-0.143886	0.486571	0.327786	0.550292	-0.321614	1.38062	0.968083	1.92847	0.267031	3.88525	5.0522	5.53808	8.81731	-0.453126	-0.419379	-0.0595713	-0.104784	-0.0251465	-0.448553	0.935423	0.555563	1.59253	-0.0793454	3.30689	3.30818	5.24707	7.92555		100	8.15	7.75	3.69	-3.06	7.58	7.19	6.88	-2.27
10.048	0.0843487	-0.141505	0.492308	0.333599	0.564329	-0.314081	1.40588	0.982384	1.95593	0.2875	3.92639	5.08417	5.57165	8.86121	-0.453005	-0.417318	-0.0633564	-0.0997427	-0.0196567	-0.441497	0.950197	0.569279	1.61218	-0.0595477	3.35217	3.33969	5.29821	7.96911		101	8.54	8.11	4.07	-3.07	7.92	7.54	7.19	-2.28
10.148	0.077148	-0.139123	0.487304	0.339413	0.553466	-0.306548	1.4126	0.996682	1.94873	0.30797	3.95459	5.11615	5.61523	8.90511	-0.452393	-0.415258	-0.0664067	-0.0947013	-0.0146484	-0.434443	0.964478	0.582996	1.60913	-0.0397554	3.38599	3.37121	5.31104	8.01265		102	8.87	8.38	4.55	-3.09	8.23	7.83	7.46	-2.31
10.248	0.0723882	-0.136742	0.499878	0.345225	0.56775	-0.299017	1.4447	1.01098	1.98084	0.328434	4.00623	5.14812	5.66907	8.94901	-0.445434	-0.413198	-0.0496821	-0.0896614	0.00574	-0.427389	0.993896	0.596712	1.63147	-0.0199626	3.42224	3.40271	5.36829	8.0562		103	9.13	8.64	5.02	-3.11	8.52	8.09	7.72	-2.34
10.348	0.078124	-0.134362	0.498046	0.351038	0.568114	-0.291486	1.4624	1.02527	2.00268	0.3489	4.04565	5.18009	5.7334	8.9929	-0.443604	-0.411138	-0.0422373	-0.0846213	0.0178223	-0.420338	1.00671	0.610423	1.65088	-0.000175	3.45337	3.43422	5.41113	8.09973		104	9.43	8.98	5.45	-3.12	8.85	8.43	8.03	-2.36
10.448	0.0828843	-0.131981	0.502806	0.356849	0.580443	-0.283956	1.46155	1.03957	2.02673	0.369363	4.08142	5.21206	5.78113	9.03678	-0.444215	-0.409078	-0.0294204	-0.079582	0.0223389	-0.413286	1.0144	0.624136	1.66174	0.0196129	3.48377	3.46572	5.47839	8.14326		105	9.81	9.38	5.83	-3.12	9.22	8.78	8.38	-2.37
10.548	0.0695791	-0.129602	0.506835	0.36266	0.584472	-0.276429	1.48096	1.05386	2.03857	0.389821	4.11279	5.24402	5.82422	9.08066	-0.454347	-0.407019	-0.0351572	-0.074544	0.0187974	-0.406236	1.03394	0.637844	1.68115	0.0393985	3.53442	3.49721	5.53735	8.18678		106	10.19	9.69	6.18	-3.12	9.55	9.07	8.68	-2.38
10.648	0.077148	-0.127222	0.526367	0.368471	0.590576	-0.268901	1.50049	1.06816	2.06982	0.410281	4.15185	5.27598	5.86328	9.12453	-0.442627	-0.40496	-0.0253911	-0.069506	0.0244141	-0.399188	1.04858	0.651554	1.70874	0.0591786	3.56982	3.52871	5.58618	8.2303		107	10.49	9.97	6.5	-3.1	9.85	9.38	8.99	-2.34
10.748	0.087647	-0.124843	0.538819	0.37428	0.594971	-0.261376	1.51294	1.08245	2.09815	0.430734	4.19165	5.30793	5.92261	9.1684	-0.439697	-0.402902	-0.0148921	-0.0644693	0.0446777	-0.39214	1.06811	0.665261	1.73267	0.0789594	3.59204	3.5602	5.64746	8.27381		108	10.85	10.34	6.83	-3.07	10.2	9.74	9.32	-2.29
10.848	0.103515	-0.122464	0.55078	0.38009	0.607177	-0.253851	1.54224	1.09673	2.12353	0.451189	4.22705	5.33989	5.97949	9.21226	-0.427979	-0.400844	-0.000978	-0.0594326	0.0488281	-0.385095	1.0846	0.678965	1.7644	0.0987347	3.62915	3.59169	5.70435	8.31731		109	11.23	10.76	7.15	-3.04	10.59	10.11	9.67	-2.25
10.948	0.0948482	-0.120086	0.561401	0.385899	0.613891	-0.246326	1.57092	1.11102	2.1344	0.471642	4.25525	5.37184	6.02722	9.25612	-0.415162	-0.398786	0.00159	-0.0543966	0.0535889	-0.37805	1.10156	0.69267	1.77112	0.118511	3.67688	3.62317	5.75012	8.36081		110	11.59	11.12	7.52	-3.03	10.98	10.45	10	-2.23
11.048	0.101562	-0.117708	0.572265	0.391707	0.624267	-0.238805	1.58935	1.12531	2.16455	0.492089	4.29736	5.40379	6.08105	9.29996	-0.404541	-0.396729	0.00684	-0.0493619	0.0703111	-0.371005	1.12158	0.706371	1.79931	0.138284	3.71533	3.65465	5.79785	8.40431		111	11.9	11.41	7.85	-3.04	11.3	10.71	10.27	-2.25
11.148	0.114013	-0.11533	0.584716	0.397515	0.637206	-0.231283	1.60962	1.1396	2.18481	0.512538	4.34521	5.43573	6.12866	9.34381	-0.395997	-0.394672	0.017333	-0.0443272	0.0827637	-0.363964	1.14172	0.720073	1.8313	0.158052	3.76074	3.68613	5.86328	8.44779		112	12.16	11.66	8.14	-3.04	11.56	10.95	10.51	-2.28
11.248	0.122193	-0.112953	0.585328	0.403321	0.63733	-0.223763	1.62561	1.15388	2.21253	0.532981	4.37659	5.46767	6.18762	9.38764	-0.393432	-0.392616	0.0235605	-0.0392939	0.0870361	-0.356922	1.13745	0.733773	1.84363	0.177821	3.79627	3.7176	5.90857	8.49127		113	12.45	11.97	8.43	-3.06	11.84	11.22	10.77	-2.3
11.348	0.116454	-0.110576	0.586669	0.409128	0.639159	-0.216243	1.62744	1.16816	2.22217	0.553425	4.40576	5.49961	6.2168	9.43147	-0.399659	-0.390559	0.0273428	-0.0342605	0.0888672	-0.349882	1.1687	0.74747	1.85498	0.197584	3.82178	3.74907	5.95313	8.53474		114	12.75	12.3	8.77	-3.09	12.16	11.51	11.02	-2.32
11.448	0.110351	-0.1082	0.590819	0.414934	0.645263	-0.208725	1.64697	1.18244	2.2417	0.573867	4.45654	5.53155	6.26758	9.4753	-0.38794	-0.388504	0.0371084	-0.0292278	0.0966797	-0.342843	1.1864	0.761167	1.88062	0.217348	3.87207	3.78054	6.00586	8.57821		115	13.07	12.61	9.12	-3.11	12.44	11.78	11.3	-2.33
11.548	0.120237	-0.105824	0.614134	0.420739	0.647093	-0.201209	1.67028	1.19672	2.26135	0.594304	4.48596	5.56348	6.32995	9.51911	-0.395388	-0.386448	0.045042	-0.0241965	0.106563	-0.335805	1.18848	0.77486	1.89416	0.237109	3.90979	3.812	6.05114	8.62167		116	13.39	12.88	9.42	-3.14	12.75	12.09	11.58	-2.34
11.648	0.0991201	-0.103448	0.620116	0.426544	0.637694	-0.193692	1.68213	1.211	2.26343	0.614741	4.50757	5.59541	6.36938	9.56293	-0.397462	-0.384393	0.0256338	-0.0191651	0.0969238	-0.328769	1.20483	0.788554	1.9043	0.256865	3.91943	3.84346	6.08618	8.66512		117	13.67	13.16	9.72	-3.18	13.05	12.4	11.84	-2.35
11.748	0.0957041	-0.101072	0.619142	0.432348	0.634278	-0.186179	1.6853	1.22528	2.27783	0.635174	4.53784	5.62733	6.43457	9.60673	-0.402587	-0.382338	0.0280771	-0.0141351	0.0998535	-0.321733	1.22046	0.802247	1.9126	0.276621	3.95337	3.87492	6.11841	8.70857		118	13.98	13.42	10.05	-3.2	13.34	12.63	12.07	-2.35
11.848	0.0917959	-0.0986973	0.623046	0.438152	0.642089	-0.178665	1.70068	1.23955	2.30517	0.655607	4.57251	5.65925	6.48144	9.65054	-0.404298	-0.380284	0.0400381	-0.00911	0.0917969	-0.3147	1.23157	0.815935	1.92822	0.296372	3.98852	3.90637	6.16895	8.75201		119	14.24	13.69	10.43	-3.24	13.59	12.85	12.31	-2.37
11.948	0.090941	-0.0963225	0.631957	0.443955	0.647093	-0.171152	1.72302	1.25383	2.3219	0.676038	4.61877	5.69117	6.53723	9.69433	-0.399538	-0.37823	0.0391831	-0.00408	0.108521	-0.307667	1.24109	0.829625	1.95667	0.316124	4.0365	3.93782	6.22473	8.79545		120	14.51	13.94	10.79	-3.28	13.87	13.1	12.55	-2.4
12.048	0.0968008	-0.0939484	0.63391	0.449757	0.652953	-0.163641	1.73474	1.2681	2.34729	0.696464	4.65198	5.72309	6.58215	9.73812	-0.393678	-0.376176	0.0430899	0.000952	0.106321	-0.300635	1.25574	0.843311	1.97253	0.335873	4.08142	3.96927	6.26965	8.83888		121	14.76	14.19	11.05	-3.31	14.17	13.39	12.78	-2.43
12.148	0.091918	-0.0915743	0.634643	0.45556	0.673217	-0.15613	1.75134	1.28237	2.36194	0.716891	4.67273	5.755	6.6322	9.78191	-0.390748	-0.374123	0.0418692	0.00598	0.12146	-0.293605	1.26257	0.856997	1.99475	0.355617	4.11194	4.00071	6.31189	8.8823		122	15.02	14.43	11.28	-3.37	14.46	13.65	13	-2.47
12.248	0.0948496	-0.0892009	0.647584	0.461361	0.674439	-0.148622	1.77209	1.29665	2.37854	0.737313	4.6947	5.78691	6.69153	9.82568	-0.381957	-0.37207	0.0528574	0.011007	0.127808	-0.286575	1.28491	0.870682	2.00574	0.375361	4.1322	4.03215	6.37683	8.92572		123	15.21	14.65	11.55	-3.43	14.72	13.85	13.21	-2.53
12.348	0.0976553	-0.0868276	0.644286	0.467162	0.677245	-0.141114	1.78833	1.31091	2.38916	0.757735	4.73706	5.81881	6.7334	9.86945	-0.38672	-0.370017	0.0573721	0.0160337	0.125	-0.279548	1.30164	0.884363	2.01221	0.3951	4.16235	4.06358	6.427	8.96913		124	15.37	14.83	11.87	-3.5	14.96	14.04	13.38	-2.6
12.448	0.100463	-0.0844546	0.653441	0.472962	0.68225	-0.133607	1.81482	1.32518	2.4176	0.778156	4.76501	5.85072	6.78699	9.91322	-0.383912	-0.367965	0.060668	0.0210597	0.147339	-0.27252	1.31811	0.898045	2.04065	0.41484	4.20667	4.09501	6.47449	9.01254		125	15.54	15	12.15	-3.59	15.14	14.21	13.51	-2.67
12.548	0.101562	-0.0820824	0.65039	0.478761	0.687255	-0.126102	1.82764	1.33945	2.43408	0.798571	4.80713	5.88262	6.8352	9.95697	-0.386963	-0.365913	0.0673823	0.0260844	0.150389	-0.265494	1.32703	0.911723	2.05713	0.434576	4.23852	4.12644	6.54223	9.05594		126	15.69	15.14	12.42	-3.68	15.3	14.36	13.64	-2.76
12.648	0.116088	-0.0797101	0.668822	0.484561	0.690063	-0.118597	1.84827	1.35371	2.45837	0.818987	4.83948	5.91451	6.87488	10.0007	-0.385865	-0.363862	0.0782461	0.0311091	0.171021	-0.258471	1.34094	0.925402	2.08582	0.454308	4.2904	4.15787	6.59363	9.09932		127	15.82	15.3	12.67	-3.54	15.46	14.55	13.78	-2.69
12.748	0.116334	-0.0773386	0.678834	0.490359	0.695924	-0.111094	1.85583	1.36798	2.47815	0.839398	4.87268	5.9464	6.93372	10.0445	-0.372191	-0.361811	0.079957	0.0361324	0.165161	-0.251447	1.35339	0.939079	2.10144	0.47404	4.32361	4.18929	6.65247	9.14271		128	16.28	15.73	12.93	-5.39	15.89	15	14.24	-4.45
12.848	0.117065	-0.0749671	0.681518	0.496157	0.702758	-0.103591	1.87073	1.38224	2.50647	0.85981	4.90662	5.9783	6.96985	10.0882	-0.375123	-0.35976	0.0965571	0.0411558	0.17395	-0.244426	1.37476	0.952752	2.11975	0.493767	4.35193	4.22071	6.68494	9.18609		129	15.3	14.89	13.17	-4.39	15.14	14.68	14.13	-3.9
12.948	0.136717	-0.072596	0.697264	0.501955	0.716307	-0.0960897	1.89771	1.3965	2.52783	0.88022	4.95361	6.01019	7.02246	10.132	-0.361574	-0.357709	0.10449	0.0461785	0.175781	-0.237404	1.37427	0.966427	2.14111	0.513494	4.39893	4.25212	6.74316	9.22946		130	17.57	16.99	13.43	-3.46	16.88	15.87	15.37	-2.94
13.048	0.127928	-0.0702256	0.68286	0.507751	0.713622	-0.0885904	1.90478	1.41076	2.53491	0.900624	4.97827	6.04207	7.05273	10.1757	-0.366212	-0.355659	0.0998521	0.0511998	0.169187	-0.230384	1.38355	0.980097	2.15796	0.533219	4.41943	4.28354	6.77563	9.27283		131	17.64	16.96	13.66	-3.48	16.95	15.86	15.29	-2.93
13.148	0.122314	-0.0678552	0.694091	0.513548	0.715332	-0.0810911	1.92236	1.42502	2.54834	0.921029	5.00708	6.07395	7.11523	10.2194	-0.372315	-0.353609	0.103515	0.0562212	0.178467	-0.223367	1.39832	0.993768	2.17139	0.552938	4.44458	4.31495	6.83984	9.31619		132	17.67	16.98	13.9	-3.35	16.94	15.93	15.28	-2.82
13.248	0.136597	-0.0654855	0.714722	0.519343	0.718384	-0.0735941	1.93323	1.43928	2.57459	0.941429	5.05896	6.10582	7.15735	10.2631	-0.357543	-0.35156	0.11023	0.0612412	0.195435	-0.216349	1.40124	1.00744	2.19592	0.572658	4.48669	4.34635	6.89368	9.35955		133	17.76	17.08	14.1	-3.22	16.98	16.01	15.31	-2.78
13.348	0.137816	-0.0631158	0.72766	0.525138	0.721557	-0.066097	1.95349	1.45353	2.59924	0.96183	5.07971	6.1377	7.21472	10.3068	-0.362428	-0.349511	0.121215	0.0662612	0.204224	-0.209334	1.41492	1.0211	2.22229	0.592372	4.52087	4.37775	6.94934	9.40289		134	17.84	17.11	14.28	-3.11	17.02	16.08	15.35	-2.73
13.448	0.145384	-0.0607466	0.7218	0.530933	0.723021	-0.0586011	1.96912	1.46779	2.61291	0.982229	5.10705	6.16957	7.26575	10.3505	-0.360475	-0.347462	0.117308	0.0712806	0.198364	-0.202318	1.42676	1.03477	2.23035	0.612087	4.55408	4.40915	6.98645	9.44624		135	17.95	17.21	14.4	-2.99	17.12	16.17	15.44	-2.59
13.548	0.141845	-0.058378	0.725585	0.536726	0.719481	-0.0511075	1.97925	1.48204	2.62475	1.00262	5.13061	6.20144	7.31445	10.3942	-0.368165	-0.345414	0.123046	0.0762986	0.202147	-0.195304	1.43628	1.04843	2.23804	0.6318	4.5935	4.44054	7.02954	9.48957		136	18.12	17.39	14.52	-2.83	17.28	16.34	15.63	-2.37
13.648	0.137695	-0.0560094	0.727539	0.54252	0.72705	-0.0436138	2.00024	1.49629	2.64575	1.02302	5.16553	6.2333	7.36523	10.4379	-0.360596	-0.343366	0.125	0.0813166	0.21582	-0.188293	1.45691	1.0621	2.26514	0.651507	4.61645	4.47194	7.08398	9.5329		137	18.34	17.61	14.8	-2.6	17.51	16.56	15.86	-2.12
13.748	0.138794	-0.0536416	0.740357	0.548312	0.737916	-0.0361225	2.01331	1.51054	2.66687	1.04341	5.20569	6.26516	7.42493	10.4816	-0.359497	-0.341319	0.129761	0.0863332	0.222534	-0.181281	1.45715	1.07576	2.28577	0.671215	4.66834	4.50332	7.13586	9.57622		138	18.58	17.85	14.47	-2.36	17.75	16.79	16.1	-1.92
13.848	0.144652	-0.0512738	0.738158	0.554105	0.743773	-0.0286311	2.01917	1.52479	2.68005	1.0638	5.22302	6.29702	7.48718	10.5253	-0.365358	-0.339272	0.143431	0.0913499	0.234253	-0.174272	1.46851	1.08942	2.31116	0.690917	4.68982	4.53471	7.17688	9.61954		139	18.71	17.99	15.73	-2.23	17.9	16.9	16.26	-1.86
13.948	0.142577	-0.0489064	0.736571	0.559897	0.739745	-0.0211408	2.03662	1.53904	2.698	1.08418	5.2583	6.32888	7.54419	10.569	-0.359621	-0.337225	0.141844	0.096366	0.232666	-0.167263	1.47778	1.10307	2.323	0.710619	4.70972	4.56608	7.23535	9.66285		140	18.73	18.05	16.31	-2.17	17.93	16.87	16.29	-1.8
14.048	0.137938	-0.0465396	0.739256	0.565687	0.746581	-0.0136528	2.03979	1.55328	2.70312	1.10457	5.29272	6.36073	7.58423	10.6126	-0.360597	-0.335178	0.146483	0.101381	0.23364	-0.160255	1.48889	1.11673	2.3374	0.73032	4.74365	4.59746	7.28149	9.70616		141	18.82	18.18	16.31	-1.95	18.07	17.05	16.5	-1.53
14.148	0.130004	-0.0441729	0.749145	0.571478	0.74475	-0.00616	2.0553	1.56753	2.71814	1.12495	5.30798	6.39258	7.62707	10.6563	-0.350709	-0.333132	0.146605	0.106395	0.241089	-0.153249	1.50293	1.13039	2.36121	0.750015	4.76697	4.62884	7.33777	9.74945		142	18.89	18.3	16.4	-1.81	18.29	17.33	16.74	-1.32
14.248	0.126222	-0.0418069	0.745362	0.577268	0.758302	0.00132	2.06299	1.58177	2.72266	1.14533	5.34155	6.42442	7.67578	10.7	-0.354491	-0.331087	0.14087	0.111409	0.243408	-0.146244	1.51453	1.14404	2.3728	0.76971	4.79858	4.6602	7.39087	9.79274		143	18.74	18.21	16.5	-2.05	18.28	17.24	16.58	-1.48
14.348	0.123901	-0.039441	0.752808	0.583057	0.760132	0.00881	2.08997	1.59601	2.72815	1.16571	5.39001	6.45626	7.7345	10.7436	-0.362427	-0.329041	0.140503	0.116422	0.235474	-0.13924	1.53198	1.15769	2.3844	0.7894	4.82361	4.69157	7.44958	9.83602		144	18.09	17.56	16.62	-2.81	17.82	16.65	15.99	-2.09
14.448	0.145507	-0.0370754	0.776366	0.588846	0.775878	0.0162912	2.12354	1.61025	2.76294	1.18609	5.43115	6.48811	7.79101	10.7873	-0.347169	-0.326996	0.157958	0.121435	0.245117	-0.132237	1.55347	1.17134	2.41357	0.80909	4.87842	4.72293	7.4978	9.8793		145	16.98	16.45	16.78	-3.95	16.82	15.6	14.97	-3.14
14.548	0.151122	-0.0347105	0.781981	0.594634	0.793212	0.0237735	2.14306	1.62449	2.78638	1.20646	5.47412	6.51994	7.84375	10.8309	-0.333253	-0.324952	0.164062	0.126446	0.25488	-0.125236	1.55957	1.18499	2.4331	0.828778	4.91333	4.75429	7.55273	9.92258		146	15.93	15.42	16.96	-4.92	15.78	14.6	14.02	-4.01
14.648	0.15161	-0.0323456	0.797851	0.600422	0.797362	0.0312559	2.14111	1.63873	2.81006	1.22683	5.50146	6.55177	7.88892	10.8745	-0.333253	-0.322907	0.162108	0.131457	0.266602	-0.118236	1.56958	1.19864	2.44702	0.848461	4.94873	4.78565	7.59229	9.96584		147	15.13	14.66	17.18	-5.58	15.06	13.94	13.34	-4.61
14.748	0.151368	-0.0299815	0.80005	0.606209	0.811036	0.0387359	2.16284	1.65297	2.82983	1.2472	5.53858	6.5836	7.95899	10.9181	-0.333007	-0.320863	0.169923	0.136467	0.266846	-0.111236	1.57422	1.21228	2.47437	0.868144	4.97608	4.817	7.64282	10.0091		148	14.59	14.06	17.4	-6.06	14.55	13.44	12.82	-5.03
14.848	0.158446	-0.0276174	0.79492	0.611995	0.812499	0.046216	2.16943	1.6672	2.83862	1.26757	5.573	6.61543	7.99341	10.9618	-0.343751	-0.31882	0.182372	0.141477	0.263916	-0.104239	1.578	1.22593	2.48315	0.887821	4.99658	4.84835	7.69263	10.0524		149	14.34	13.87	17.48	-6.28	14.22	13.27	12.6	-5.27
14.948	0.156127	-0.0252536	0.798949	0.617782	0.804076	0.0536949	2.17908	1.68144	2.84802	1.28793	5.60974	6.64725	8.03625	11.0054	-0.339967	-0.316776	0.19226	0.146487	0.261597	-0.0972422	1.58301	1.23957	2.49475	0.907499	5.02771	4.87969	7.74719	10.0956		150	13.95	13.28	17.54	-6.58	13.67	12.53	12.13	-5.45
15.048	0.163085	-0.0228906	0.801756	0.623566	0.807372	0.0611716	2.19775	1.69567	2.87085	1.30829	5.64233	6.67907	8.07251	11.049	-0.342775	-0.314734	0.210936	0.151495	0.262937	-0.0902464	1.59241	1.25321	2.51147	0.927175	5.03882	4.91104	7.78344	10.1388		151	15.89	15.56	17.62	-4.22	15.66	14.87	13.96	-3.26
15.148	0.149536	-0.0205275	0.805542	0.629352	0.80725	0.0686483	2.21545	1.7099	2.88806	1.32866	5.67126	6.71089	8.12097	11.0926	-0.345093	-0.312691	0.19934	0.156503	0.255005	-0.0832528	1.62	1.26685	2.53674	0.946845	5.07751	4.94238	7.83411	10.1821		152	16.76	16.29	17.55	-3.74	16.51	15.5	14.98	-2.88
15.248	0.159058	-0.0181652	0.813599	0.635135	0.81482	0.0761226	2.24451	1.72413	2.90784	1.34901	5.72595	6.7427	8.16223	11.1362	-0.33142	-0.310649	0.204957	0.161509	0.276245	-0.0762594	1.62378	1.28049	2.56018	0.966516	5.12048	4.97371	7.88879	10.2253		153	16.93	16.45	17.11	-3.58	16.66	15.63	15.09	-2.75
15.348	0.153563	-0.015803	0.819335	0.640919	0.816894	0.083597	2.23901	1.73836	2.92139	1.36937	5.75952	6.77451	8.20337	11.1798	-0.334962	-0.308607	0.20703	0.166516	0.276367	-0.0692683	1.6405	1.29412	2.57007	0.986181	5.1499	5.00504	7.92993	10.2685		154	17.16	16.65	16.12	-3.27	16.88	15.87	15.25	-2.43
15.448	0.167845	-0.013441	0.824339	0.646703	0.839232	0.0910703	2.26306	1.75259	2.94592	1.38973	5.79333	6.80632	8.24133	11.2234	-0.328004	-0.306566	0.213744	0.171522	0.281372	-0.0622773	1.65503	1.30776	2.5885	1.00585	5.18005	5.03637	7.98743	10.3117		155	17.95	17.57	14.99	-2.24	17.7	16.87	16.05	-1.19
15.548	0.153563	-0.0110798	0.821288	0.652485	0.834715	0.0985413	2.27783	1.76681	2.95068	1.41008	5.83545	6.83812	8.29687	11.2669	-0.33716	-0.304525	0.216795	0.176527	0.28613	-0.0552875	1.66589	1.32139	2.59936	1.02551	5.21045	5.0677	8.02954	10.3549		156	19.6	19.33	14.04	-0.35	19.48	18.78	17.75	0.81
15.648	0.160278	-0.00872	0.831909	0.658267	0.839233	0.106012	2.28284	1.78104	2.96155	1.43043	5.86584	6.86992	8.34485	11.3105	-0.339966	-0.302484	0.217895	0.181531	0.300659	-0.0483001	1.67749	1.33502	2.61584	1.04517	5.23669	5.09902	8.06165	10.3981		157	21.38	21.02	13.46	1.39	21.41	20.68	19.72	2.57
15.748	0.164063	-0.00636	0.841797	0.664048	0.849122	0.113481	2.29834	1.79526	2.99048	1.45077	5.90454	6.90171	8.40503	11.3541	-0.336181	-0.300444	0.229004	0.186535	0.310547	-0.0413127	1.70557	1.34865	2.63916	1.06483	5.27954	5.13033	8.12988	10.4413		158	22.29	21.7	13.09	1.78	22.26	21.17	20.72	2.97
15.848	0.166992	-0.004	0.858398	0.669829	0.865722	0.12095	2.32275	1.80948	3.01343	1.47112	5.94897	6.93351	8.43774	11.3976	-0.327149	-0.298404	0.240478	0.191538	0.31543	-0.0343276	1.73206	1.36228	2.66357	1.08448	5.31006	5.16165	8.16821	10.4845		159	22.19	21.51	12.75	1.57	22.27	21.14	20.66	2.78
15.948	0.175659	-0.00164	0.870727	0.675609	0.878051	0.128417	2.3429	1.8237	3.03137	1.49146	5.9845	6.9653	8.49475	11.4412	-0.324585	-0.296364	0.24475	0.196541	0.322144	-0.0273427	1.75488	1.37591	2.69177	1.10413	5.35169	5.19296	8.23303	10.5277		160	22.38	21.79	13.92	1.92	22.41	21.3	20.77	2.6
16.048	0.184569	0.000722	0.883788	0.681388	0.881835	0.135883	2.36401	1.83792	3.06592	1.5118	6.02319	6.99709	8.54321	11.4847	-0.317628	-0.294325	0.259764	0.201542	0.337155	-0.020359	1.76465	1.38953	2.7146	1.12378	5.39404	5.22427	8.27368	10.5709		161	19.84	18.05	15.46	-1.84	19.6	17.01	17.76	-1.89
16.148	0.184569	0.00308	0.883788	0.687168	0.867919	0.143348	2.37158	1.85214	3.0874	1.53214	6.0581	7.02887	8.58984	11.5283	-0.326905	-0.292286	0.259765	0.206543	0.333008	-0.0133776	1.77796	1.40316	2.72437	1.14343	5.41553	5.25557	8.32251	10.6141		162	18.48	18.1	15.68	-1.93	17.84	17.14	16.26	-1.01
16.248	0.186646	0.00544	0.885865	0.692946	0.869508	0.150811	2.37585	1.86636	3.11267	1.55248	6.09705	7.06065	8.63855	11.5718	-0.335082	-0.290248	0.263795	0.211543	0.338745	-0.0064	1.78406	1.41678	2.73767	1.16308	5.46228	5.28687	8.38464	10.6572		163	20.5	20.75	15.85	0.76	20.18	20.13	18.68	2.42
16.348	0.186401	0.0078	0.88562	0.698724	0.87561	0.158274	2.38123	1.88057	3.12268	1.57281	6.1344	7.09243	8.68933	11.6153	-0.335328	-0.288209	0.251831	0.216543	0.350464	0.000583	1.80627	1.4304	2.75183	1.18272	5.47595	5.31817	8.4552	10.7004		164	21.52	20.82	16.41	0.98	21.49	20.35	19.97	2.06
16.448	0.195433	0.0101564	0.900267	0.704501	0.886107	0.165736	2.40369	1.89478	3.14709	1.59315	6.19372	7.1242	8.7511	11.6589	-0.32068	-0.286171	0.264525	0.221542	0.365112	0.00756	1.82422	1.44402	2.77576	1.20236	5.5199	5.34946	8.50891	10.7435		165	21.26	20.69	17.84	0.84	21.07	20.24	19.63	1.98
16.548	0.187744	0.0125139	0.898681	0.710278	0.89624	0.173196	2.41748	1.909	3.16455	1.61348	6.22705	7.15597	8.79419	11.7024	-0.322266	-0.284134	0.268554	0.22654	0.367187	0.0145392	1.84522	1.45764	2.78809	1.222	5.54541	5.38075	8.55762	10.7867		166	20.97	20.14	19.74	0.28	20.91	19.56	19.26	1.21
16.648	0.198973	0.0148714	0.917723	0.716054	0.905516	0.180655	2.43701	1.92321	3.18408	1.6338	6.26611	7.18774	8.85425	11.7459	-0.316652	-0.282097	0.274168	0.231538	0.388184	0.0215145	1.85254	1.47126	2.80493	1.24163	5.60181	5.41204	8.6145	10.8298		167	20.42	19.87	21.13	0.01	20.14	19.27	18.66	0.98
16.748	0.190431	0.0172282	0.9209	0.721829	0.905031	0.188113	2.44775	1.93742	3.18921	1.65413	6.29639	7.2195	8.90454	11.7894	-0.311522	-0.28006	0.275636	0.236535	0.405518	0.0284898	1.87073	1.48487	2.82764	1.26126	5.62256	5.44331	8.64087	10.8729		168	20.61	20.04	21.23	0.15	20.28	19.38	18.79	1.08
16.848	0.189574	0.019585	0.91809	0.727605	0.915404	0.19557	2.45667	1.95162	3.21716	1.67445	6.33044	7.25127	8.95007	11.8329	-0.330201	-0.278024	0.270385	0.241532	0.404175	0.0354627	1.87817	1.49848	2.84631	1.28089	5.66418	5.4746	8.68469	10.9161		169	20.7	20.12	21.3	0.23	20.35	19.47	18.86	1.13
16.948	0.190429	0.0219414	0.925048	0.733379	0.926024	0.203026	2.46338	1.96583	3.22998	1.69478	6.35913	7.28303	9.00586	11.8764	-0.319581	-0.275988	0.277343	0.246528	0.403564	0.0424355	1.88159	1.5121	2.85498	1.30052	5.70825	5.50587	8.71533	10.9592		170	20.8	20.18	19.56	0.3	20.42	19.54	18.93	1.18
17.048	0.190673	0.024297	0.926757	0.739153	0.940185	0.21048	2.48291	1.98004	3.24756	1.71509	6.39209	7.31478	9.04712	11.9199	-0.329102	-0.273952	0.28125	0.251522	0.405272	0.049407	1.91003	1.5257	2.87866	1.32015	5.74951	5.53714	8.76172	11.0023		171	20.86	20.24	16.82	0.37	20.47	19.58	18.97	1.22
17.148	0.197142	0.0266527	0.93933	0.744926	0.946654	0.217934	2.50525	1.99424	3.28161	1.73541	6.43591	7.34653	9.09851	11.9633	-0.32068	-0.271917	0.295775	0.256517	0.421997	0.0563763	1.91223	1.53931	2.901	1.33977	5.78357	5.56841	8.80969	11.0454		172	20.9	20.27	18.36	0.41	20.51	19.61	19.01	1.25
17.248	0.199342	0.0290076	0.935915	0.750698	0.954957	0.225386	2.51721	2.00844	3.29553	1.75572	6.46375	7.37828	9.1322	12.0068	-0.324095	-0.269882	0.291872	0.26151	0.416138	0.0633455	1.9303	1.55292	2.91663	1.35939	5.79358	5.59967	8.83923	11.0885		173	20.93	20.3	20.54	0.46	20.53	19.61	19.02	1.27
17.348	0.200316	0.0313625	0.9364	0.756471	0.955443	0.232837	2.52966	2.02264	3.30798	1.77604	6.50329	7.41002	9.19128	12.0503	-0.317506	-0.267847	0.300658	0.266503	0.417114	0.0703123	1.94434	1.56652	2.93713	1.379	5.82751	5.63094	8.88489	11.1316		174	20.94	20.32	20.14	0.48	20.55	19.61	19.02	1.29
17.448	0.196532	0.0337171	0.942382	0.762243	0.969237	0.240288	2.54736	2.03684	3.32788	1.79635	6.53662	7.44177	9.22485	12.0937	-0.32129	-0.265813	0.308593	0.271496	0.422852	0.0772791	1.95373	1.58013	2.95288	1.39862	5.86279	5.66219	8.92822	11.1747		175	20.95	20.34	20.08	0.51	20.56	19.6	19.03	1.3
17.548	0.19812	0.0360709	0.94812	0.768013	0.974975	0.247736	2.56091	2.05104	3.34119	1.81666	6.57361	7.4735	9.28308	12.1372	-0.319703	-0.263779	0.304565	0.276487	0.428832	0.0842445	1.98035	1.59373	2.96057	1.41823	5.89563	5.69345	8.96887	11.2178		176	20.95	20.36	19.18	0.54	20.57	19.6	19.02	1.31
17.648	0.208862	0.0384247	0.9552	0.773784	0.982055	0.255184	2.57971	2.06524	3.37341	1.83696	6.60388	7.50524	9.32141	12.1806	-0.314576	-0.261746	0.31726	0.281478	0.435425	0.0912078	1.99866	1.60733	2.98669	1.43784	5.93982	5.7247	9.02063	11.2608		177	20.95	20.38	19.36	0.57	20.55	19.59	19.01	1.31
17.748	0.211792	0.0407778	0.961792	0.779553	0.994751	0.26263	2.59802	2.07943	3.39197	1.85727	6.64587	7.53697	9.37878	12.2241	-0.313598	-0.259713	0.32605	0.286468	0.457886	0.0981708	2.01147	1.62093	3.00159	1.45745	5.97766	5.75594	9.04114	11.3039		178	20.95	20.39	19.49	0.58	20.55	19.58	19	1.3
17.848	0.214844	0.0431309	0.968506	0.785323	0.991699	0.270076	2.61816	2.09363	3.4104	1.87757	6.68018	7.5687	9.43628	12.2675	-0.311035	-0.25768	0.33667	0.291458	0.4646	0.105132	2.02991	1.63453	3.01807	1.47705	6.01978	5.78719	9.08887	11.3469		179	20.95	20.41	19.57	0.59	20.55	19.58	18.99	1.28
17.948	0.227417	0.0454836	0.979614	0.791092	1.00427	0.277521	2.63538	2.10782	3.44665	1.89787	6.7262	7.60043	9.4884	12.3109	-0.306031	-0.255647	0.357055	0.296448	0.477661	0.112092	2.05347	1.64813	3.04822	1.49666	6.06165	5.81843	9.14832	11.39		180	20.96	20.41	19.64	0.62	20.53	19.58	18.98	1.27
18.048	0.227538	0.0478355	0.987303	0.79686	1.01611	0.284964	2.65283	2.12201	3.47021	1.91816	6.75146	7.63214	9.53515	12.3544	-0.286134	-0.253616	0.36328	0.301435	0.485349	0.119052	2.06934	1.66172	3.07422	1.51626	6.08935	5.84966	9.20727	11.433		181	20.97	20.42	19.69	0.63	20.52	19.59	18.98	1.25
18.148	0.227538	0.0501875	1.00098	0.802627	1.02026	0.292406	2.66064	2.1362	3.48975	1.93846	6.78686	7.66387	9.57422	12.3978	-0.295899	-0.251584	0.368896	0.306423	0.485352	0.126009	2.07788	1.67531	3.06812	1.53585	6.11084	5.8809	9.25391	11.4761		182	20.99	20.42	19.74	0.64	20.51	19.57	18.96	1.23
18.248	0.232423	0.0525388	1.00586	0.808394	1.021	0.299847	2.67358	2.15039	3.49878	1.95875	6.81885	7.69558	9.62988	12.4412	-0.312499	-0.249553	0.370118	0.31141	0.49585	0.132966	2.09082	1.6889	3.08838	1.55545	6.13696	5.91212	9.30396	11.5191		183	21.01	20.41	19.77	0.64	20.51	19.55	18.94	1.2
18.348	0.228026	0.05489	1.01074	0.814161	1.02026	0.307287	2.68774	2.16458	3.51123	1.97904	6.85132	7.72729	9.67383	12.4846	-0.311769	-0.247522	0.373046	0.316397	0.501221	0.13992	2.09277	1.70249	3.10718	1.57504	6.16943	5.94335	9.35767	11.5621		184	21.02	20.41	19.79	0.64	20.5	19.54	18.94	1.19
18.448	0.227293	0.0572409	1.01465	0.819927	1.02978	0.314726	2.70947	2.17877	3.53467	1.99933	6.87842	7.759	9.70898	12.528	-0.311525	-0.245491	0.38452	0.321382	0.500977	0.146875	2.09839	1.71608	3.11304	1.59463	6.18506	5.97457	9.41431	11.6052		185	21.03	20.42	19.82	0.62	20.5	19.51	18.93	1.17
18.548	0.227782	0.059591	1.01465	0.825691	1.03174	0.322163	2.71728	2.19295	3.5542	2.01962	6.90967	7.7907	9.75976	12.5714	-0.32129	-0.243461	0.380858	0.326367	0.506834	0.153828	2.11401	1.72967	3.12842	1.61422	6.21216	6.00579	9.47095	11.6482		186	21.05	20.41	19.85	0.63	20.48	19.47	18.91	1.16
18.648	0.225585	0.0619411	1.01855	0.831456	1.0376	0.3296	2.73291	2.20713	3.56982	2.0399	6.94116	7.82241	9.79102	12.6148	-0.323487	-0.241431	0.382812	0.331352	0.510986	0.160779	2.13171	1.74325	3.14819	1.6338	6.24585	6.03701	9.5332	11.6912		187	21.06	20.41	19.86	0.61	20.48	19.46	18.88	1.14
18.748	0.241089	0.0642905	1.0321	0.83722	1.06287	0.337034	2.75452	2.22132	3.58752	2.06018	6.98181	7.85411	9.8573	12.6581	-0.313598	-0.239401	0.386597	0.336335	0.520386	0.16773	2.14941	1.75684	3.1637	1.65339	6.26306	6.06822	9.58215	11.7342		188	21.05	20.41	19.86	0.61	20.45	19.44	18.87	1.13
18.848	0.24121	0.0666399	1.0227	0.842984	1.06323	0.344469	2.76416	2.23549	3.60327	2.08046	7.01929	7.8858	9.91992	12.7015	-0.311769	-0.237372	0.39453	0.341318	0.526367	0.174679	2.16174	1.77042	3.17944	1.67297	6.27881	6.09943	9.63696	11.7772		189	21.05	20.39	19.87	0.6	20.41	19.42	18.85	1.12
18.948	0.240355	0.0689889	1.02331	0.848747	1.06189	0.351902	2.77502	2.24967	3.6156	2.10074	7.03943	7.9175	9.96399	12.7449	-0.31067	-0.235343	0.389525	0.346301	0.527466	0.181627	2.17371	1.784	3.19397	1.69254	6.29895	6.13063	9.68274	11.8202		190	21.03	20.37	19.88	0.6	20.38	19.39	18.83	1.1
19.048	0.232299	0.0713372	1.0448	0.854509	1.0758	0.359334	2.7865	2.26385	3.64123	2.12101	7.08044	7.94918	10.0126	12.7882	-0.305055	-0.233315	0.401244	0.351282	0.527464	0.188575	2.18457	1.79758	3.2135	1.71212	6.33996	6.16183	9.72742	11.8632		191	21.03	20.35	19.88	0.58	20.35	19.36	18.8	1.07
19.148	0.237548	0.0736855	1.04199	0.860271	1.08057	0.366765	2.79175	2.27803	3.66357	2.14129	7.11304	7.98087	10.0605	12.8316	-0.296144	-0.231287	0.408202	0.356263	0.530273	0.19552	2.20667	1.81116	3.2207	1.73169	6.37646	6.19303	9.7793	11.9061		192	20.99	20.32	19.89	0.54	20.3	19.32	18.79	1.04
19.248	0.228395	0.0760331	1.06043	0.866032	1.08362	0.374194	2.80603	2.2922	3.68201	2.16156	7.14124	8.01255	10.118	12.8749	-0.306518	-0.229259	0.405152	0.361243	0.536987	0.202464	2.22339	1.82473	3.23669	1.75126	6.40637	6.22422	9.82141	11.9491		193	21.38	20.3	19.9	0.53	20.27	19.28	18.78	1.01
19.348	0.233397	0.0783806	1.06738	0.871793	1.08447	0.381623	2.81885	2.30638	3.68335	2.18183	7.177	8.04423	10.1584	12.9183	-0.311769	-0.227232	0.402343	0.366223	0.541992	0.209407	2.23535	1.83831	3.24585	1.77083	6.43335	6.25541	9.87524	11.992		194	20.39	20.27	19.91	0.53	20.25	19.26	18.76	0.98
19.448	0.237547	0.0807278	1.07153	0.877553	1.09228	0.38905	2.83838	2.32055	3.70654	2.20209	7.21045	8.07591	10.2012	12.9616	-0.303957	-0.225205	0.412108	0.371202	0.551758	0.216349	2.24499	1.85188	3.26343	1.7904	6.46216	6.28659	9.90454	12.035		195	19.65	20.23	19.88	0.47	20.2	19.19	18.69	0.94
19.548	0.229369	0.0830743	1.05359	0.883312	1.10022	0.396476	2.84631	2.33472	3.71423	2.22236	7.24939	8.10758	10.2323	13.0049	-0.315797	-0.223178	0.410033	0.37618	0.561399	0.22329	2.25855	1.86545	3.27698	1.80996	6.49548	6.31778	9.94543	12.078		196	19.08	20.21	19.88	0.36	20.1	19.08	18.62	0.88
19.648	0.243163	0.0854207	1.06958	0.889071	1.104	0.403901	2.85791	2.34889	3.73389	2.24262	7.27319	8.13925	10.2793	13.0483	-0.311524	-0.221152	0.425536	0.381158	0.563721	0.230229	2.2677	1.87902	3.28296	1.82952	6.5249	6.34896	9.98267	12.1209		197	18.73	20.16	19.87	0.34	20.07	19.08	18.61	0.86
19.748	0.250123	0.0877664	1.05872	0.894829	1.10339	0.411324	2.86292	2.36306	3.75476	2.26288	7.29358	8.17091	10.3351	13.0916	-0.310668	-0.219126	0.43274	0.386134	0.562622	0.237168	2.28418	1.89259	3.30139	1.84908	6.54163	6.38013	10.0226	12.1638		198	18.47	20.12	19.86	0.34	20.07	19.07	18.6	0.84
19.848	0.235595	0.0901122	1.05591	0.900587	1.10425	0.418748	2.87744	2.37722	3.76514	2.28314	7.32764	8.20258	10.3733	13.1349	-0.313478	-0.2171	0.42578	0.391111	0.561768	0.244105	2.28809	1.90615	3.32007	1.86863	6.58325	6.41131	10.0645	12.2068		199	18.29	20.12	19.85	0.32	20.07	19.06	18.56	0.84
19.948	0.231688	0.0924575	1.05762	0.906345	1.10596	0.42617	2.89111	2.39139	3.78491	2.30339	7.35864	8.23424	10.4141	13.1782	-0.313722	-0.215075	0.423827	0.396086	0.575195	0.251041	2.30237	1.91972	3.34521	1.88818	6.60889	6.44247	10.1096	12.2497		200	18.35	20.08	19.82	0.29	20.03	19.02	18.52	0.79
20.048	0.234252	0.0948021	1.06628	0.912101	1.10705	0.433589	2.90588	2.40556	3.79895	2.32364	7.40271	8.26589	10.4598	13.2215	-0.31067	-0.21305	0.432494	0.401061	0.578245	0.257976	2.31812	1.93328	3.3678	1.90773	6.63342	6.47364	10.1652	12.2926		201	18.13	20.06	19.79	0.26	19.99	18.98	18.48	0.75
20.148	0.242187	0.0971467	1.07422	0.917857	1.11084	0.441009	2.9231	2.41972	3.82104	2.3439	7.44409	8.29755	10.5303	13.2648	-0.318604	-0.211026	0.442138	0.406035	0.582031	0.264909	2.33679	1.94684	3.37378	1.92728	6.66235	6.5048	10.2085	12.3355		202	17.29	20.04	19.78	0.25	19.96	18.94	18.46	0.71
20.248	0.244996	0.0994906	1.08484	0.923612	1.12952	0.448427	2.95154	2.43388	3.83533	2.36414	7.46814	8.32919	10.5917	13.3081	-0.307983	-0.209002	0.455201	0.411009	0.583374	0.271841	2.33301	1.9604	3.39417	1.94683	6.6947	6.53596	10.2401	12.3784		203	17.75	20.02	19.77	0.24	19.93	18.92	18.44	0.67
20.348	0.250976	0.101834	1.09082	0.929367	1.12939	0.455844	2.97705	2.44804	3.86475	2.38439	7.50537	8.36084	10.6562	13.3513	-0.305665	-0.206978	0.447265	0.415982	0.567383	0.278772	2.35413	1.97396	3.40991	1.96637	6.72998	6.56711	10.2759	12.4213		204	19.22	19.99	19.76	0.23	19.9	18.9	18.41	0.66
20.448	0.255004	0.104178	1.08313	0.935122	1.13342	0.46326	2.98474	2.4622	3.88025	2.40463	7.53454	8.39248	10.6952	13.3946	-0.309937	-0.204954	0.450805	0.420954	0.575073	0.285702	2.36621	1.98752	3.43127	1.98591	6.76477	6.59826	10.3204	12.4642		205	19.21	19.97	19.72	0.24	19.88	18.88	18.4	0.66
20.548	0.247069	0.106521	1.08691	0.940875	1.13159	0.470674	3.00439	2.47636	3.8999	2.42487	7.57959	8.42412	10.7385	13.4379	-0.302003	-0.202931	0.464843	0.425925	0.583005	0.292631	2.37769	2.00107	3.45459	2.00545	6.80029	6.62941	10.3633	12.5071		206	19.59	19.98	19.65	0.26	19.87	18.88	18.41	0.68
20.648	0.24536	0.108864	1.0852	0.946628	1.13721	0.478088	3.01245	2.49051	3.90796	2.44512	7.60327	8.45576	10.7773	13.4811	-0.309815	-0.200909	0.466796	0.430897	0.586914	0.299557	2.39551	2.01463	3.46265	2.02498	6.83911	6.66055	10.4087	12.5499		207	19.97	19.98	19.61	0.27	19.87	18.89	18.41	0.7
20.748	0.243165	0.111206	1.08887	0.952381	1.14331	0.4855	3.02979	2.50467	3.92529	2.46535	7.64795	8.48739	10.8262	13.5244	-0.300048	-0.198886	0.472413	0.435866	0.59668	0.306484	2.40869	2.02818	3.48779	2.04451	6.88794	6.69169	10.4473	12.5928		208	19.92	19.98	19.58	0.3	19.87	18.9	18.42	0.71
20.848	0.249022	0.113548	1.09473	0.958133	1.14868	0.492912	3.0415	2.51882	3.9292	2.48559	7.677	8.51902	10.8865	13.5676	-0.29419	-0.196864	0.472655	0.440836	0.606201	0.313408	2.42456	2.04173	3.51123	2.06404	6.92505	6.72283	10.5076	12.6357		209	19.89	20	19.55	0.31	19.89	18.91	18.42	0.72
20.948	0.231688	0.115889	1.09253	0.963885	1.14917	0.500323	3.05127	2.53297	3.94311	2.50582	7.72021	8.55065	10.9238	13.6109	-0.29419	-0.194843	0.478271	0.445805	0.624023	0.320332	2.43823	2.05528	3.51733	2.08357	6.9563	6.75396	10.5667	12.6785		210	19.99	20.02	19.51	0.33	19.89	18.9	18.42	0.75
21.048	0.233397	0.11823	1.09888	0.969635	1.15088	0.507731	3.05713	2.54712	3.94482	2.52605	7.75732	8.58227	10.9824	13.6541	-0.296144	-0.192821	0.48828	0.450773	0.631835	0.327255	2.45593	2.06883	3.53857	2.1031	6.9956	6.78509	10.6191	12.7214		211	20.11	20.04	19.48	0.35	19.89	18.9	18.41	0.75
21.148	0.243041	0.120571	1.10242	0.975385	1.15491	0.515139	3.08826	2.56127	3.974	2.54628	7.79822	8.61389	11.0311	13.6973	-0.290163	-0.1908	0.493773	0.455741	0.635864	0.334176	2.46167	2.08237	3.55432	2.12262	7.02673	6.81621	10.674	12.7642		212	20.23	20.05	19.46	0.35	19.87	18.9	18.39	0.75
21.248	0.245119	0.122911	1.11011	0.981135	1.14722	0.522545	3.09229	2.57542	3.98779	2.5665	7.82178	8.6455	11.084	13.7406	-0.292235	-0.18878	0.501955	0.460707	0.631836	0.341096	2.47949	2.09592	3.55444	2.14214	7.052	6.84733	10.7131	12.807		213	20.32	20.05	19.43	0.35	19.87	18.87	18.37	0.73
21.348	0.249022	0.125251	1.12427	0.986884	1.15478	0.529951	3.1062	2.58956	4.00366	2.58673	7.86108	8.67712	11.1291	13.7838	-0.297853	-0.18676	0.503905	0.465674	0.645508	0.348014	2.48303	2.10946	3.58154	2.16165	7.10278	6.87845	10.7715	12.8499		214	20.39	20.05	19.42	0.33	19.85	18.85	18.36	0.72
21.448	0.250854	0.127591	1.12195	0.992633	1.16467	0.537356	3.11926	2.60371	4.01306	2.60695	7.88416	8.70873	11.1659	13.827	-0.302124	-0.18474	0.509399	0.470639	0.649292	0.354932	2.51721	2.123	3.59509	2.18117	7.1322	6.90956	10.8124	12.8927		215	20.43	20.04	19.42	0.32	19.83	18.84	18.35	0.7
21.548	0.271361	0.12993	1.14246	0.99838	1.17541	0.544759	3.15393	2.61785	4.0531	2.62717	7.94153	8.74033	11.2391	13.8702	-0.276002	-0.182721	0.526244	0.475604	0.664182	0.361849	2.53015	2.13654	3.63147	2.20068	7.16247	6.94068	10.8837	12.9355		216	20.44	20.03	19.42	0.32	19.84	18.82	18.33	0.69
21.648	0.260863	0.132269	1.14734	1.00413	1.17419	0.552161	3.16248	2.63199	4.06579	2.64739	7.97815	8.77194	11.2775	13.9134	-0.27649	-0.180701	0.53308	0.480568	0.662964	0.368763	2.54175	2.15008	3.65173	2.22019	7.1925	6.97179	10.9161	12.9783		217	20.43	20.01	19.42	0.31	19.84	18.8	18.31	0.68
21.748	0.266603	0.134608	1.14551	1.00987	1.18042	0.559562	3.16675	2.64613	4.08374	2.6676	8.00342	8.80353	11.332	13.9566	-0.270751	-0.178683	0.536866	0.485531	0.672852	0.375678	2.55933	2.16362	3.66968	2.2397	7.22998	7.00289	10.9609	13.0211		218	20.45	20.01	19.44	0.3	19.81	18.78	18.3	0.66
21.848	0.276123	0.136946	1.15503	1.01562	1.18018	0.566962	3.18188	2.66027	4.10864	2.68782	8.04224	8.83513	11.377	13.9997	-0.27295	-0.176664	0.554443	0.490494	0.678711	0.38259	2.57886	2.17715	3.69849	2.2592	7.26269	7.03399	11.0095	13.0639		219	20.47	20	19.46	0.3	19.8	18.77	18.29	0.63
21.948	0.27661	0.139284	1.16723	1.02137	1.19971	0.574361	3.2019	2.67441	4.13623	2.70803	8.08935	8.86672	11.4199	14.0429	-0.257082	-0.174646	0.562499	0.495457	0.69043	0.389502	2.57996	2.19069	3.72241	2.2787	7.3042	7.06508	11.0725	13.1067		220	20.49	19.97	19.47	0.3	19.77	18.74	18.26	0.62
22.048	0.273559	0.141621	1.15637	1.02711	1.19714	0.581758	3.21057	2.68855	4.14514	2.72823	8.1217	8.89831	11.4601	14.0861	-0.263795	-0.172629	0.561645	0.500418	0.697142	0.396412	2.59717	2.20422	3.72546	2.2982	7.32068	7.09618	11.1263	13.1495		221	20.49	19.93	19.46	0.29	19.73	18.69	18.24	0.59
22.148	0.279053	0.143959	1.16187	1.03286	1.19653	0.589155	3.22388	2.70268	4.1665	2.74844	8.15454	8.9299	11.5164	14.1293	-0.261963	-0.170611	0.561035	0.505379	0.70874	0.403321	2.61255	2.21775	3.74438	2.3177	7.36157	7.12727	11.1726	13.1923		222	20.46	19.88	19.45	0.27	19.68	18.66	18.2	0.55
22.248	0.284424	0.146295	1.17871	1.0386	1.21338	0.596549	3.24072	2.71681	4.19092	2.76864	8.20264	8.96148	11.5803	14.1724	-0.249268	-0.168594	0.585938	0.510339	0.725586	0.410229	2.62073	2.23128	3.7771	2.33719	7.40356	7.15835	11.2366	13.235		223	20.43	19.84	19.44	0.25	19.61	18.61	18.17	0.51
22.348	0.286986	0.148632	1.18542	1.04434	1.23181	0.603944	3.26477	2.73095	4.20544	2.78885	8.2406	8.99306	11.6415	14.2156	-0.254274	-0.166578	0.582884	0.515298	0.7323	0.417135	2.63452	2.2448	3.79138	2.35668	7.44568	7.18943	11.2843	13.2778		224	20.41	19.81	19.41	0.22	19.53	18.55	18.07	0.48
22.448	0.289062	0.150968	1.17212	1.05009	1.21851	0.611337	3.28467	2.74508	4.21924	2.80905	8.27026	9.02464	11.6826	14.2587	-0.252198	-0.164561	0.575195	0.520257	0.730713	0.42404	2.64929	2.25833	3.81299	2.37618	7.47485	7.22051	11.333	13.3205		225	20.4	19.73	19.39	0.1	19.5	18.48		0.36
22.548	0.287963	0.153303	1.17859	1.05583	1.23669	0.618728	3.29944	2.75921	4.24158	2.82924	8.31579	9.05621	11.7362	14.3018	-0.256959	-0.162546	0.583861	0.525215	0.725462	0.430945	2.6648	2.27185	3.82776	2.39566	7.51672	7.25158	11.379	13.3633		226	20.4	19.66	19.38	0.03	19.11	18.37		0.34
22.648	0.295897	0.155639	1.18652	1.06157	1.24097	0.626119	3.31885	2.77333	4.26294	2.84944	8.35107	9.08778	11.7874	14.345	-0.253175	-0.16053	0.58203	0.530173	0.739014	0.437847	2.68396	2.28537	3.84937	2.41515	7.552	7.28266	11.4316	13.406		227	20.4	19.15	19.36	-0.44	15.52	17.65		-0.28
22.748	0.307252	0.157973	1.18445	1.06731	1.24255	0.633508	3.3363	2.78746	4.28088	2.86963	8.38806	9.11934	11.8397	14.3881	-0.255248	-0.158515	0.583619	0.535129	0.745239	0.444749	2.71167	2.2989	3.85681	2.43463	7.58533	7.31372	11.4728	13.4488		228	20.38	18.48	19.36	-1.17	8.03	17.59		-0.76
22.848	0.315428	0.160308	1.19995	1.07305	1.25244	0.640897	3.35425	2.80159	4.28882	2.88982	8.42554	9.1509	11.8809	14.4312	-0.250978	-0.1565	0.589842	0.540085	0.749023	0.451649	2.71765	2.31241	3.88257	2.45411	7.61059	7.34478	11.5293	13.4915		229	20.36	19.23	19.36	-0.34	4.51	18.38		0.32
22.948	0.319214	0.162642	1.1925	1.07879	1.25623	0.648285	3.36169	2.81571	4.30017	2.91001	8.46423	9.18247	11.9354	14.4743	-0.251343	-0.154486	0.595581	0.545041	0.752808	0.458549	2.74182	2.32593	3.89392	2.47358	7.65125	7.37584	11.5802	13.5342		230	20.34	18.83	19.34	-0.68	2.87	18.22	16.6	0.22
23.048	0.324096	0.164976	1.203	1.08453	1.25745	0.65567	3.39001	2.82983	4.34192	2.93019	8.5199	9.21402	11.9911	14.5174	-0.244508	-0.152472	0.604613	0.549995	0.769407	0.465447	2.76257	2.33945	3.92639	2.49306	7.70129	7.4069	11.6261	13.5769		231	20.33	18.64	19.31	-0.88	2.21	18.13	16.48	0.11
23.148	0.328979	0.167309	1.20984	1.09027	1.26208	0.663056	3.40271	2.84395	4.35901	2.95038	8.54431	9.24557	12.0431	14.5605	-0.239625	-0.150458	0.595581	0.55495	0.768433	0.472343	2.76563	2.35296	3.95056	2.51253	7.73181	7.43795	11.6639	13.6196		232	20.3	18.53	19.26	-1.01	1.89	18.02	16.36	0.02
23.248	0.341797	0.169642	1.22461	1.09601	1.27515	0.670439	3.42725	2.85807	4.36987	2.97056	8.58838	9.27712	12.0908	14.6036	-0.226806	-0.148445	0.615967	0.559903	0.783203	0.479239	2.78674	2.36648	3.97534	2.532	7.76611	7.469	11.7275	13.6623		233	20.28	18.39	19.21	-1.15	1.52	17.87	16.13	-0.09
23.348	0.336059	0.171975	1.23035	1.10174	1.28845	0.677822	3.43494	2.87219	4.39099	2.99074	8.6217	9.30867	12.13	14.6467	-0.224732	-0.146432	0.616088	0.564856	0.78894	0.486133	2.79736	2.37999	3.99646	2.55146	7.79895	7.50005	11.7723	13.705		234	20.15	18.08	19.07	-1.43	1.16	17.6	15.79	-0.27
23.448	0.342529	0.174308	1.23315	1.10748	1.28735	0.685204	3.46704	2.88631	4.40161	3.01092	8.64771	9.34021	12.1873	14.6898	-0.226075	-0.144419	0.616943	0.569808	0.793945	0.493026	2.82971	2.3935	4.01489	2.57093	7.83691	7.53109	11.8357	13.7477		235	20.04	17.75		-1.73	0.83	17.34	15.5	-0.62
23.548	0.343627	0.176639	1.25378	1.11322	1.30017	0.692583	3.47986	2.90043	4.42615	3.03109	8.68005	9.37175	12.2411	14.7328	-0.213257	-0.142407	0.621948	0.574759	0.800658	0.499919	2.85425	2.407	4.03577	2.59039	7.88098	7.56212	11.9012	13.7904		236	18.49	17.54		-1.94	0.57	17.12	15.32	-0.78
23.648	0.356444	0.178971	1.25879	1.11895	1.31299	0.699963	3.49268	2.91454	4.46411	3.05126	8.72046	9.40328	12.2969	14.7759	-0.212159	-0.140395	0.632812	0.57971	0.81543	0.506809	2.85754	2.42051	4.05225	2.60985	7.9292	7.59316	11.9475	13.833		237	12.47	17.38		-2.1	0.38	17.03	15.24	-0.87
23.748	0.359742	0.181302	1.26209	1.12469	1.31629	0.70734	3.51917	2.92865	4.48499	3.07143	8.7428	9.43481	12.3373	14.819	-0.210814	-0.138383	0.630006	0.58466	0.824341	0.513699	2.85998	2.43402	4.06531	2.62931	7.96326	7.62419	11.9874	13.8757		238	5.74	17.25		-2.21	0.26	16.97	15.19	-0.97
23.848	0.34265	0.183633	1.25671	1.13042	1.31653	0.714718	3.51794	2.94276	4.49548	3.0916	8.76892	9.46634	12.3827	14.862	-0.212525	-0.136372	0.630736	0.589609	0.827026	0.520586	2.87964	2.44752	4.07947	2.64876	7.98938	7.65522	12.0292	13.9184		239	2.9	17.16	17.47	-2.31	0.2	16.9	15.12	-1.07
23.948	0.33911	0.185964	1.26465	1.13616	1.33057	0.722094	3.53394	2.95687	4.52295	3.11177	8.80029	9.49787	12.4199	14.9051	-0.202149	-0.134361	0.632567	0.594558	0.84082	0.527473	2.89722	2.46102	4.10889	2.66821	8.0249	7.68624	12.0781	13.961		240	1.64	17.11	17.13	-2.38	0.18	16.84	15.09	-1.13
24.048	0.344726	0.188293	1.26269	1.14189	1.33472	0.729468	3.54736	2.97098	4.55225	3.13193	8.8374	9.52939	12.4805	14.9481	-0.204347	-0.132351	0.65039	0.599506	0.846922	0.53436	2.91382	2.47452	4.12475	2.68766	8.06177	7.71726	12.1406	14.0037		241	1.04	17.11	16.88	-2.38	0.17	16.83	15.09	-1.13
24.148	0.335937	0.190623	1.27124	1.14762	1.33716	0.736842	3.56201	2.98509	4.57446	3.15209	8.86548	9.56091	12.5281	14.9911	-0.195801	-0.13034	0.651123	0.604453	0.849365	0.541243	2.94312	2.48802	4.14307	2.7071	8.10156	7.74828	12.1826	14.0463		242	0.57	17.2	16.64	-2.28	0.19	16.9	15.14	-1.06
24.248	0.340088	0.192953	1.28516	1.15336	1.3396	0.744213	3.57959	2.99919	4.59033	3.17225	8.91064	9.59242	12.5872	15.0342	-0.199218	-0.128331	0.668702	0.6094	0.859619	0.548127	2.94495	2.50152	4.16064	2.72655	8.13721	7.77929	12.2412	14.0889		243	0.12	17.27	16.41	-2.17	0.22	16.95	15.21	-1
24.348	0.329956	0.195282	1.2926	1.15909	1.33728	0.751585	3.58337	3.0133	4.61169	3.19241	8.94006	9.62393	12.6161	15.0772	-0.201539	-0.126321	0.664917	0.614346	0.8573	0.555009	2.97522	2.51501	4.18591	2.74599	8.16052	7.8103	12.2784	14.1316		244	-0.3	17.35	16.1	-2.09	0.21	16.99	15.22	-0.95
24.448	0.346313	0.19761	1.30945	1.16482	1.34802	0.758955	3.60583	3.0274	4.63025	3.21256	8.974	9.65545	12.6796	15.1202	-0.206177	-0.124312	0.681274	0.619291	0.862427	0.56189	2.98706	2.52851	4.20081	2.76543	8.19836	7.8413	12.3358	14.1742		245	-0.61	17.37	15.8	-2.06	0.19	17	15.15	-0.95
24.548	0.352539	0.199938	1.32129	1.17055	1.3562	0.766324	3.62939	3.0415	4.65381	3.23271	9.01709	9.68695	12.7327	15.1632	-0.20044	-0.122304	0.689453	0.624236	0.870116	0.56877	3.01135	2.542	4.22241	2.78486	8.23389	7.8723	12.3867	14.2168		246	-0.81	17.31	15.57	-2.11	0.13	16.94	15.07	-0.99
24.648	0.359497	0.202267	1.33386	1.17628	1.36853	0.773692	3.64978	3.0556	4.6781	3.25286	9.04553	9.71845	12.7821	15.2062	-0.199341	-0.120295	0.700073	0.62918	0.884644	0.575648	3.02808	2.55549	4.23694	2.8043	8.26184	7.9033	12.4464	14.2594		247	-0.94	17.23	15.47	-2.19	0.05	16.89	15.01	-1.05
24.748	0.358155	0.204594	1.34839	1.18201	1.38696	0.781058	3.67407	3.0697	4.69849	3.27301	9.07959	9.74995	12.8394	15.2492	-0.190917	-0.118287	0.702881	0.634123	0.897217	0.582525	3.06518	2.56898	4.25317	2.82373	8.30005	7.93429	12.4939	14.302		248	-1.04	17.17	15.37	-2.24	-0.01	16.84	14.94	-1.12
24.848	0.375976	0.206921	1.36816	1.18774	1.40112	0.788423	3.69189	3.0838	4.72803	3.29316	9.12256	9.78144	12.9023	15.2922	-0.184815	-0.11628	0.716552	0.639066	0.915039	0.5894	3.07886	2.58247	4.2771	2.84315	8.32764	7.96528	12.5569	14.3446		249	-1.12	17.13	15.29	-2.3	-0.05	16.79	14.91	-1.16
24.948	0.383788	0.209248	1.37402	1.19347	1.40088	0.795788	3.7019	3.09789	4.75537	3.3133	9.15576	9.81294	12.9473	15.3352	-0.178956	-0.114272	0.730468	0.644008	0.920898	0.596276	3.09827	2.59595	4.29272	2.86258	8.34888	7.99627	12.592	14.3872		250	-1.15	17.14	15.23	-2.31	-0.09	16.77	14.92	-1.17
25.048	0.376098	0.211574	1.36999	1.19919	1.40857	0.80315	3.70544	3.11199	4.76721	3.33344	9.18494	9.84442	13.0057	15.3781	-0.18274	-0.112266	0.728393	0.648949	0.928587	0.603149	3.10278	2.60944	4.31213	2.882	8.38782	8.02725	12.6464	14.4297		251	-1.11	17.18	15.26	-2.3	-0.1	16.76	14.98	-1.16
25.148	0.368163	0.213901	1.37598	1.20492	1.41455	0.810513	3.72314	3.12608	4.77881	3.35358	9.22412	9.87591	13.0449	15.4211	-0.180909	-0.110259	0.732421	0.653889	0.93457	0.610021	3.10132	2.62292	4.32568	2.90142	8.40967	8.05823	12.6914	14.4723		252	-1.01	17.24	15.33	-2.24	-0.1	16.77	15.03	-1.13
25.248	0.373292	0.216226	1.38477	1.21065	1.41968	0.817873	3.72827	3.14017	4.79566	3.37371	9.25244	9.90738	13.0986	15.4641	-0.172118	-0.108253	0.737062	0.658829	0.943359	0.616892	3.12378	2.6364	4.34839	2.92084	8.43994	8.0892	12.7356	14.5149		253	-0.93	17.3	15.43	-2.2	-0.1	16.78	15.05	-1.1
25.348	0.373779	0.218551	1.39551	1.21637	1.42627	0.825233	3.74268	3.15426	4.81006	3.39385	9.29443	9.93886	13.1487	15.507	-0.161377	-0.106247	0.742187	0.663768	0.950439	0.623762	3.14417	2.64988	4.3689	2.94026	8.48364	8.12018	12.7813	14.5574		254	-0.92	17.33	15.46	-2.17	-0.1	16.78	15.04	-1.08
25.448	0.384887	0.220877	1.40613	1.2221	1.4425	0.832592	3.76501	3.16835	4.84021	3.41398	9.32458	9.97034	13.1864	15.55	-0.166138	-0.104241	0.743042	0.668707	0.962524	0.630631	3.16296	2.66336	4.38708	2.95967	8.51379	8.15114	12.8348	14.6		255	-0.98	17.32	15.42	-2.18	-0.12	16.78	15	-1.07
25.548	0.377807	0.223201	1.41321	1.22782	1.45935	0.839949	3.78186	3.18244	4.86267	3.43411	9.36658	10.0018	13.2362	15.5929	-0.165162	-0.102237	0.75769	0.673645	0.962036	0.637498	3.1803	2.67684	4.40002	2.97908	8.55212	8.18211	12.8964	14.6425		256	-1.06	17.31	15.34	-2.18	-0.16	16.78	14.97	-1.08
25.648	0.385619	0.225525	1.42248	1.23355	1.47497	0.847305	3.79333	3.19653	4.89416	3.45424	9.39807	10.0333	13.2909	15.6358	-0.155641	-0.100232	0.763549	0.678582	0.967896	0.644364	3.19983	2.69031	4.42542	2.99849	8.58313	8.21307	12.9474	14.6851		257	-1.15	17.3	15.26	-2.19	-0.19	16.76	14.94	-1.09
25.748	0.393434	0.227849	1.43079	1.23927	1.48279	0.85466	3.8053	3.21061	4.90564	3.47436	9.42127	10.0647	13.3417	15.6788	-0.147826	-0.0982274	0.761598	0.683518	0.971558	0.651229	3.21191	2.70379	4.43713	3.01789	8.61853	8.24402	12.9784	14.7276		258	-1.2	17.27	15.19	-2.21	-0.23	16.75	14.91	-1.11
25.848	0.399414	0.230173	1.43433	1.24499	1.48315	0.862014	3.80322	3.22469	4.92139	3.49448	9.46436	10.0962	13.3889	15.7217	-0.155274	-0.0962233	0.769287	0.688454	0.975586	0.658092	3.229	2.71726	4.43921	3.03729	8.64575	8.27498	13.0198	14.7701		259	-1.23	17.24	15.16	-2.24	-0.28	16.73	14.88	-1.14
25.948	0.39746	0.232496	1.45386	1.25072	1.48682	0.869367	3.83252	3.23878	4.95435	3.51461	9.49731	10.1277	13.4412	15.7646	-0.145997	-0.0942195	0.777099	0.69339	0.989014	0.664955	3.23987	2.73073	4.4624	3.05669	8.66528	8.30592	13.0625	14.8126		260	-1.2	17.21	15.17	-2.25	-0.33	16.69	14.85	-1.19
26.048	0.394409	0.234818	1.46472	1.25644	1.49158	0.876718	3.83923	3.25286	4.97327	3.53472	9.53943	10.1591	13.4911	15.8075	-0.135132	-0.0922164	0.789917	0.698324	0.999877	0.671817	3.27222	2.74419	4.47522	3.07609	8.69763	8.33687	13.12	14.8551		261	-1.12	17.16	15.23	-2.28	-0.36	16.66	14.83	-1.24
26.148	0.403563	0.237141	1.46582	1.26216	1.50073	0.884069	3.86377	3.26694	4.98413	3.55484	9.57178	10.1906	13.5547	15.8504	-0.137696	-0.0902133	0.798583	0.703258	1.00903	0.678676	3.27625	2.75766	4.50146	3.09549	8.73364	8.36781	13.1682	14.8976		262	-1.05	17.14	15.29	-2.3	-0.39	16.63	14.8	-1.28
26.248	0.40149	0.239463	1.46985	1.26788	1.50427	0.891417	3.87927	3.28102	4.99744	3.57495	9.62415	10.222	13.5978	15.8933	-0.134154	-0.0882109	0.796998	0.708191	1.01257	0.685535	3.29553	2.77113	4.52502	3.11488	8.7572	8.39875	13.2108	14.9401		263	-1.04	17.11	15.32	-2.33	-0.41	16.59	14.78	-1.31
26.348	0.391723	0.241785	1.47742	1.2736	1.51599	0.898766	3.89905	3.29509	5.01697	3.59506	9.67322	10.2535	13.6444	15.9362	-0.122437	-0.0862085	0.798461	0.713124	1.02429	0.692392	3.31897	2.78459	4.5387	3.13427	8.77869	8.42969	13.256	14.9826		264	-1.06	17.1	15.33	-2.35	-0.44	16.58	14.76	-1.33
26.448	0.403197	0.244106	1.49304	1.27932	1.5199	0.906113	3.90491	3.30917	5.04626	3.61517	9.70837	10.2849	13.6991	15.9791	-0.114625	-0.0842065	0.810424	0.718056	1.03625	0.699249	3.33301	2.79805	4.56409	3.15365	8.81946	8.46061	13.3126	15.0251		265	-1.08	17.13	15.32	-2.35	-0.43	16.58	14.77	-1.35
26.548	0.409179	0.246427	1.49902	1.28504	1.5376	0.913458	3.91821	3.32324	5.0564	3.63528	9.73389	10.3163	13.7522	16.022	-0.120362	-0.0822052	0.823974	0.722986	1.03247	0.706104	3.34277	2.81151	4.57397	3.17304	8.84131	8.49154	13.3652	15.0676		266	-1.09	17.15	15.29	-2.32	-0.42	16.6	14.78	-1.33
26.648	0.409423	0.248747	1.50293	1.29076	1.54565	0.920804	3.94214	3.33731	5.07373	3.65538	9.77881	10.3478	13.8027	16.0648	-0.112306	-0.0802039	0.830077	0.727917	1.03809	0.712957	3.34863	2.82497	4.60107	3.19242	8.85498	8.52247	13.4124	15.11		267	-1.09	17.19	15.28	-2.29	-0.4	16.63	14.8	-1.3
26.748	0.391847	0.251067	1.50317	1.29647	1.54541	0.928146	3.95361	3.35138	5.08569	3.67548	9.82373	10.3792	13.8457	16.1077	-0.118163	-0.0782033	0.82422	0.732846	1.04199	0.71981	3.36792	2.83843	4.60718	3.2118	8.88013	8.55338	13.4434	15.1525		268	-1.1	17.2	15.25	-2.24	-0.41	16.65	14.8	-1.26
26.848	0.389647	0.253387	1.51074	1.30219	1.55713	0.935489	3.96948	3.36545	5.09546	3.69559	9.84936	10.4106	13.8909	16.1505	-0.122315	-0.0762027	0.828124	0.737776	1.05566	0.726661	3.38538	2.85188	4.62085	3.23117	8.91943	8.5843	13.5002	15.1949		269	-1.12	17.21	15.22	-2.22	-0.44	16.67	14.74	-1.25
26.948	0.404906	0.255707	1.52038	1.30791	1.56311	0.942831	3.97302	3.37952	5.11853	3.71568	9.88415	10.442	13.9335	16.1934	-0.118532	-0.0742025	0.835814	0.742705	1.07117	0.733511	3.39734	2.86534	4.64026	3.25055	8.95618	8.61521	13.5546	15.2374		270	-1.14	17.19	15.18	-2.2	-0.47	16.66	14.71	-1.25
27.048	0.403198	0.258026	1.52429	1.31362	1.56287	0.95017	3.98498	3.39359	5.13611	3.73578	9.90759	10.4735	13.9845	16.2362	-0.12024	-0.072203	0.829956	0.747632	1.07532	0.740361	3.4148	2.87879	4.64221	3.26992	8.98767	8.64612	13.6134	15.2798		271	-1.17	17.16	15.14	-2.21	-0.49	16.64	14.66	-1.27
27.148	0.413329	0.260345	1.53808	1.31934	1.56494	0.957509	3.99463	3.40765	5.15405	3.75587	9.94653	10.5049	14.0332	16.2791	-0.11255	-0.0702035	0.833983	0.752559	1.08496	0.747208	3.422	2.89224	4.65991	3.28929	9.01684	8.67703	13.6621	15.3222		272	-1.21	17.14	15.11	-2.22	-0.53	16.63	14.64	-1.29
27.248	0.398561	0.262663	1.53919	1.32505	1.56604	0.964846	4.00354	3.42171	5.17249	3.77596	9.97327	10.5363	14.0851	16.3219	-0.12683	-0.0682046	0.825319	0.757485	1.08606	0.754055	3.42663	2.90569	4.67078	3.30866	9.03186	8.70793	13.7023	15.3647		273	-1.23	17.14	15.08	-2.23	-0.53	16.62	14.62	-1.31
27.348	0.40515	0.264981	1.54993	1.33077	1.57678	0.972183	4.026	3.43578	5.1947	3.79605	10.0153	10.5677	14.1349	16.3647	-0.116578	-0.0662059	0.847289	0.762411	1.10046	0.760899	3.4469	2.91914	4.68713	3.32802	9.05603	8.73882	13.756	15.4071		274	-1.22	17.14	15.07	-2.23	-0.55	16.6	14.61	-1.31
27.448	0.410034	0.267299	1.53894	1.33648	1.57751	0.979519	4.02112	3.44984	5.20764	3.81614	10.0472	10.5991	14.1864	16.4075	-0.111695	-0.0642074	0.846557	0.767337	1.09753	0.767744	3.45776	2.93259	4.69006	3.34738	9.08801	8.76971	13.7902	15.4495		275	-1.19	17.15	15.06	-2.23	-0.57	16.6	14.6	-1.32
27.548	0.409179	0.269616	1.5498	1.3422	1.58838	0.986853	4.02588	3.4639	5.21851	3.83622	10.0776	10.6305	14.2285	16.4503	-0.103028	-0.0622097	0.853271	0.772261	1.09912	0.774587	3.46765	2.94603	4.71069	3.36674	9.11841	8.80061	13.8457	15.4919		276	-1.15	17.16	15.07	-2.24	-0.6	16.58	14.6	-1.33
27.648	0.419066	0.271933	1.55969	1.34791	1.60193	0.994186	4.04724	3.47795	5.23962	3.8563	10.1149	10.6619	14.2775	16.4931	-0.0889902	-0.060212	0.870971	0.777185	1.09875	0.781428	3.47656	2.95947	4.73181	3.3861	9.15564	8.83149	13.9025	15.5343		277	-1.12	17.15	15.07	-2.23	-0.63	16.58	14.61	-1.32
27.748	0.414063	0.274249	1.5625	1.35362	1.60889	1.00152	4.06226	3.49201	5.2605	3.87638	10.1489	10.6933	14.3311	16.5359	-0.0861807	-0.0582149	0.860353	0.782107	1.10547	0.788268	3.4801	2.97292	4.75269	3.40545	9.17798	8.86237	13.9446	15.5767		278	-1.12	17.16	15.07	-2.23	-0.65	16.56	14.6	-1.32
27.848	0.411987	0.276565	1.57214	1.35933	1.61633	1.00885	4.07336	3.50607	5.26819	3.89646	10.1725	10.7247	14.3798	16.5787	-0.0919194	-0.056218	0.873657	0.78703	1.10364	0.795107	3.49902	2.98635	4.77209	3.4248	9.21887	8.89325	13.9835	15.6191		279	-1.14	17.14	15.05	-2.24	-0.69	16.53	14.57	-1.33
27.948	0.418944	0.278881	1.58325	1.36504	1.63721	1.01618	4.09644	3.52012	5.29053	3.91653	10.2063	10.7561	14.428	16.6215	-0.0832529	-0.0542213	0.882812	0.791952	1.11426	0.801945	3.51245	2.99979	4.79443	3.44415	9.26123	8.92412	14.0313	15.6614		280	-1.17	17.12	15.04	-2.25	-0.72	16.52	14.52	-1.36
28.048	0.421142	0.281196	1.58496	1.37075	1.6394	1.02351	4.10791	3.53417	5.30249	3.93661	10.2495	10.7875	14.4727	16.6643	-0.0810556	-0.0522254	0.884521	0.796872	1.13183	0.808782	3.5221	3.01323	4.80444	3.46349	9.28247	8.955	14.0879	15.7038		281	-1.19	17.08	15.02	-2.27	-0.75	16.47	14.47	-1.37
28.148	0.414916	0.283511	1.58899	1.37646	1.6449	1.03083	4.11755	3.54822	5.31018	3.95668	10.2787	10.8188	14.5177	16.707	-0.083375	-0.0502295	0.890502	0.801793	1.13782	0.815617	3.53418	3.02666	4.81604	3.48284	9.31164	8.98587	14.1251	15.7462		282	-1.2	17.03	15.01	-2.3	-0.81	16.42	14.4	-1.4
28.248	0.411134	0.285826	1.59082	1.38217	1.65283	1.03816	4.13354	3.56227	5.32568	3.97674	10.3025	10.8502	14.5549	16.7498	-0.0754385	-0.0482342	0.888673	0.806712	1.1416	0.822451	3.54956	3.0401	4.8374	3.50218	9.35083	9.01673	14.1758	15.7885		283	-1.2	16.97	14.99	-2.37	-0.88	16.35	14.33	-1.46
28.348	0.42456	0.28814	1.60059	1.38788	1.66064	1.04549	4.15063	3.57632	5.34326	3.99681	10.3313	10.8816	14.6033	16.7925	-0.0737309	-0.046239	0.904052	0.811631	1.15503	0.829283	3.56238	3.05353	4.85889	3.52151	9.37817	9.04759	14.2363	15.8309
28.448	0.424192	0.290454	1.60193	1.39359	1.65588	1.05281	4.16174	3.59037	5.36194	4.01687	10.3737	10.913	14.6517	16.8353	-0.0662861	-0.0442442	0.905394	0.81655	1.16614	0.836115	3.56738	3.06696	4.87976	3.54085	9.40833	9.07844	14.2745	15.8732
28.548	0.416992	0.292768	1.59473	1.3993	1.67041	1.06013	4.17822	3.60441	5.36108	4.03693	10.3865	10.9443	14.678	16.878	-0.0791016	-0.04225	0.892578	0.821467	1.15942	0.842946	3.58447	3.08039	4.88037	3.56018	9.42725	9.10929	14.3027	15.9155
28.648	0.438232	0.295081	1.61792	1.405	1.68018	1.06745	4.20142	3.61846	5.38794	4.05699	10.4292	10.9757	14.7285	16.9208	-0.0717778	-0.0402559	0.911865	0.826384	1.1709	0.849775	3.60437	3.09381	4.90967	3.57951	9.46387	9.14014	14.3574	15.9579
28.748	0.438599	0.297394	1.63001	1.41071	1.68811	1.07477	4.22156	3.6325	5.40979	4.07705	10.4603	11.0071	14.7755	16.9635	-0.0750728	-0.0382624	0.9198	0.8313	1.17322	0.856603	3.61877	3.10724	4.9198	3.59884	9.5072	9.17099	14.4025	16.0002
28.848	0.42981	0.299706	1.62708	1.41641	1.6908	1.08209	4.21814	3.64654	5.43787	4.0971	10.4948	11.0384	14.8192	17.0062	-0.0938721	-0.036269	0.918823	0.836216	1.17175	0.863429	3.63171	3.12066	4.93225	3.61816	9.52942	9.20183	14.4406	16.0425
28.948	0.44226	0.302018	1.63171	1.42212	1.7074	1.08941	4.23889	3.66058	5.45666	4.11716	10.5248	11.0698	14.8732	17.0489	-0.0814219	-0.034276	0.925658	0.841131	1.17297	0.870255	3.64526	3.13409	4.95081	3.63749	9.56555	9.23266	14.4923	16.0848
29.048	0.430908	0.30433	1.63965	1.42782	1.70972	1.09673	4.24072	3.67462	5.4646	4.1372	10.5662	11.1011	14.9121	17.0916	-0.079102	-0.0322836	0.925537	0.846045	1.1748	0.87708	3.65918	3.14751	4.97217	3.65681	9.60278	9.2635	14.541	16.1271
29.148	0.43286	0.306641	1.65137	1.43353	1.71728	1.10404	4.25854	3.68865	5.47998	4.15725	10.605	11.1325	14.9514	17.1343	-0.0849619	-0.0302912	0.933593	0.850959	1.18091	0.883902	3.66187	3.16093	4.99976	3.67612	9.63403	9.29433	14.5979	16.1694
29.248	0.435548	0.308952	1.64649	1.43923	1.71851	1.11136	4.26123	3.70269	5.49854	4.17729	10.6313	11.1638	14.9875	17.177	-0.0822744	-0.0282996	0.930665	0.855871	1.18164	0.890724	3.68249	3.17434	5.00854	3.69544	9.65674	9.32515	14.6458	16.2117
29.348	0.442504	0.311263	1.65344	1.44493	1.72497	1.11867	4.28748	3.71672	5.51526	4.19734	10.6752	11.1952	15.0411	17.2197	-0.0814219	-0.026308	0.937133	0.860784	1.19421	0.897544	3.69019	3.18776	5.02283	3.71475	9.69641	9.35598	14.6798	16.2539
29.448	0.430907	0.313573	1.65527	1.45064	1.72729	1.12598	4.30127	3.73076	5.52881	4.21738	10.7104	11.2265	15.0703	17.2624	-0.0791025	-0.0243167	0.951171	0.865696	1.19653	0.904364	3.69519	3.20117	5.03687	3.73406	9.73535	9.38679	14.7207	16.2962
29.548	0.423706	0.315883	1.66028	1.45634	1.73181	1.13329	4.32165	3.74479	5.55139	4.23742	10.7467	11.2578	15.1183	17.3051	-0.0880132	-0.0223261	0.955688	0.870606	1.19324	0.911182	3.70386	3.21458	5.04919	3.75336	9.76794	9.41761	14.7704	16.3385
29.648	0.43286	0.318193	1.66699	1.46204	1.74463	1.14061	4.32886	3.75882	5.56982	4.25745	10.7729	11.2891	15.166	17.3477	-0.0930185	-0.0203356	0.964843	0.875517	1.20605	0.917999	3.72437	3.228	5.08545	3.77267	9.802	9.44842	14.8284	16.3807
29.748	0.424073	0.320502	1.66431	1.46774	1.75342	1.14791	4.33569	3.77285	5.58276	4.27748	10.8208	11.3205	15.2139	17.3904	-0.0878897	-0.0183457	0.963868	0.880426	1.21118	0.924815	3.72827	3.24141	5.09839	3.79197	9.83228	9.47922	14.8665	16.423
29.848	0.421875	0.322811	1.66772	1.47344	1.74951	1.15522	4.35083	3.78687	5.59424	4.29752	10.856	11.3518	15.2605	17.433	-0.0979004	-0.0163559	0.965332	0.885335	1.2146	0.931628	3.74878	3.25481	5.12134	3.81127	9.87305	9.51003	14.9207	16.4652
29.948	0.42285	0.325119	1.67895	1.47914	1.76221	1.16253	4.36401	3.8009	5.61865	4.31755	10.8943	11.3831	15.3166	17.4757	-0.0871596	-0.0143664	0.978514	0.890243	1.23145	0.938442	3.75879	3.26822	5.14429	3.83056	9.90942	9.54082	14.9688	16.5074
30.048	0.423095	0.327427	1.6731	1.48483	1.76611	1.16983	4.37158	3.81492	5.63452	4.33757	10.908	11.4144	15.3555	17.5183	-0.0986333	-0.0123776	0.974609	0.89515	1.23535	0.945254	3.77612	3.28162	5.1499	3.84986	9.94458	9.57162	15.0081	16.5497
30.148	0.42285	0.329735	1.67285	1.49053	1.78955	1.17714	4.38721	3.82894	5.66553	4.3576	10.9468	11.4457	15.4219	17.561	-0.0871596	-0.0103888	0.980467	0.900057	1.23926	0.952064	3.7832	3.29503	5.18896	3.86915	9.98779	9.60241	15.0647	16.5919
30.248	0.421876	0.332042	1.67188	1.49623	1.78076	1.18444	4.39795	3.84297	5.68189	4.37762	10.9692	11.477	15.4543	17.6036	-0.0917954	-0.0084	0.969728	0.904963	1.23462	0.958874	3.78784	3.30843	5.19214	3.88844	10.01	9.6332	15.0967	16.6341
30.348	0.417236	0.334349	1.68066	1.50193	1.78589	1.19174	4.40674	3.85698	5.69897	4.39764	11.0017	11.5084	15.498	17.6462	-0.104493	-0.00641	0.96875	0.909869	1.23926	0.965682	3.8075	3.32183	5.2085	3.90772	10.0444	9.66398	15.1409	16.6763
30.448	0.422729	0.336656	1.69421	1.50762	1.79333	1.19904	4.42249	3.871	5.72961	4.41765	11.0404	11.5397	15.5507	17.6888	-0.110475	-0.00443	0.97058	0.914774	1.25085	0.972489	3.80566	3.33522	5.22791	3.927	10.0695	9.69476	15.1991	16.7185
30.548	0.427001	0.338962	1.69238	1.51332	1.80127	1.20634	4.43799	3.88502	5.74976	4.43767	11.0623	11.571	15.6094	17.7314	-0.10669	-0.00244	0.96875	0.919677	1.25879	0.979295	3.81995	3.34862	5.24756	3.94629	10.1128	9.72554	15.2461	16.7607
30.648	0.423706	0.341268	1.69934	1.51901	1.79846	1.21364	4.45056	3.89904	5.77771	4.45768	11.0963	11.6022	15.6671	17.774	-0.0997314	-0.000451	0.97522	0.924581	1.2677	0.986099	3.84814	3.36202	5.26428	3.96556	10.1469	9.75631	15.2941	16.8028
30.748	0.436523	0.343573	1.70972	1.52471	1.81079	1.22094	4.47876	3.91305	5.80786	4.47769	11.136	11.6335	15.7283	17.8166	-0.0991211	0.00154	0.999756	0.929483	1.28003	0.992903	3.86597	3.37541	5.28833	3.98484	10.1787	9.78708	15.3438	16.845
30.848	0.427001	0.345878	1.71411	1.5304	1.81323	1.22823	4.49463	3.92706	5.82788	4.4977	11.1716	11.6648	15.7717	17.8592	-0.0969243	0.00352	1	0.934386	1.27075	0.999704	3.87585	3.3888	5.3042	4.00411	10.2026	9.81785	15.3848	16.8872
30.948	0.430785	0.348183	1.7157	1.5361	1.81702	1.23553	4.5199	3.94107	5.84338	4.51771	11.2123	11.6961	15.8202	17.9018	-0.0889902	0.00551	1.00378	0.939287	1.27454	1.00651	3.88745	3.40219	5.34119	4.02338	10.2413	9.8486	15.4337	16.9293
31.048	0.427001	0.350487	1.72168	1.54179	1.82446	1.24282	4.52222	3.95508	5.85107	4.53771	11.2573	11.7274	15.8616	17.9443	-0.0927744	0.00749	1.00366	0.944187	1.26855	1.01331	3.89722	3.41558	5.35498	4.04265	10.2632	9.87936	15.469	16.9715
31.148	0.427001	0.352791	1.73144	1.54748	1.83472	1.25012	4.53564	3.96909	5.87671	4.55771	11.283	11.7587	15.9102	17.9869	-0.0988774	0.00948	1.00977	0.949088	1.27832	1.0201	3.91211	3.42897	5.37842	4.06191	10.2827	9.91012	15.5198	17.0136
31.248	0.421875	0.355095	1.72681	1.55317	1.83936	1.25741	4.55811	3.9831	5.8833	4.57771	11.3208	11.7899	15.9543	18.0294	-0.0917964	0.0114624	1.01636	0.953987	1.28906	1.0269	3.92932	3.44235	5.39893	4.08117	10.3149	9.94086	15.5576	17.0558
31.348	0.420043	0.357398	1.7323	1.55886	1.84314	1.2647	4.56409	3.9971	5.91248	4.5977	11.3578	11.8212	15.9855	18.072	-0.0997319	0.0134468	1.02039	0.958886	1.30066	1.0337	3.93738	3.45573	5.41467	4.10043	10.3478	9.97161	15.6063	17.0979
31.448	0.421997	0.359701	1.74402	1.56455	1.8512	1.27199	4.57947	4.01111	5.93591	4.6177	11.3951	11.8525	16.0377	18.1145	-0.0941162	0.0154309	1.02234	0.963784	1.30872	1.04049	3.96142	3.46912	5.43982	4.11969	10.3871	10.0024	15.6456	17.14
31.548	0.420653	0.362004	1.7605	1.57024	1.85791	1.27927	4.59595	4.02511	5.96411	4.63769	11.425	11.8837	16.1055	18.1571	-0.0930185	0.0174144	1.03467	0.968681	1.31909	1.04728	3.96838	3.48249	5.46045	4.13894	10.425	10.0331	15.6836	17.1822
31.648	0.42395	0.364306	1.76379	1.57593	1.8551	1.28656	4.61462	4.03911	5.97522	4.65768	11.4596	11.915	16.1454	18.1996	-0.09021	0.0193978	1.04578	0.973578	1.32605	1.05408	3.98901	3.49587	5.47498	4.15819	10.4454	10.0638	15.7235	17.2243
31.748	0.432617	0.366608	1.77808	1.58162	1.86377	1.29385	4.63721	4.05311	6.00684	4.67766	11.4934	11.9462	16.1951	18.2421	-0.0717773	0.0213805	1.05444	0.978473	1.34082	1.06087	4.00879	3.50925	5.50513	4.17744	10.4993	10.0946	15.7891	17.2664
31.848	0.438476	0.368909	1.79028	1.58731	1.86572	1.30113	4.65698	4.06711	6.03857	4.69765	11.5388	11.9775	16.2539	18.2846	-0.0654306	0.0233632	1.06616	0.983369	1.34277	1.06766	4.01831	3.52263	5.5271	4.19669	10.5325	10.1253	15.8301	17.3085
31.948	0.428954	0.37121	1.78418	1.593	1.87158	1.30841	4.66479	4.08111	6.05615	4.71763	11.5601	12.0088	16.2952	18.3271	-0.0637217	0.0253455	1.06836	0.988264	1.34863	1.07445	4.02808	3.536	5.54053	4.21593	10.5659	10.156	15.8713	17.3506
32.048	0.417235	0.373511	1.7959	1.59868	1.87768	1.31569	4.67041	4.0951	6.07007	4.73761	11.5894	12.04	16.3301	18.3696	-0.0656748	0.0273271	1.07031	0.993157	1.35058	1.08123	4.0437	3.54937	5.5581	4.23517	10.605	10.1867	15.9277	17.3926
32.148	0.415039	0.375811	1.80347	1.60437	1.8811	1.32298	4.68579	4.1091	6.08521	4.75759	11.6282	12.0712	16.373	18.4121	-0.0581055	0.0293087	1.06812	0.99805	1.35449	1.08802	4.06604	3.56274	5.57373	4.25441	10.626	10.2174	15.9783	17.4347
32.248	0.416138	0.378111	1.82214	1.61006	1.89417	1.33026	4.70081	4.12309	6.12341	4.77756	11.6742	12.1025	16.4071	18.4546	-0.0567627	0.0312897	1.08069	1.00294	1.36902	1.0948	4.07202	3.57611	5.59607	4.27365	10.684	10.2481	16.0304	17.4768
32.348	0.423584	0.380411	1.83374	1.61574	1.896	1.33753	4.71436	4.13708	6.14111	4.79754	11.717	12.1337	16.4639	18.4971	-0.0456548	0.0332706	1.08862	1.00783	1.3689	1.10159	4.09448	3.58948	5.61377	4.29288	10.7131	10.2789	16.0713	17.5188
32.448	0.429199	0.38271	1.83691	1.62143	1.90674	1.34481	4.73096	4.15107	6.15771	4.81751	11.7595	12.1649	16.5059	18.5396	-0.0361333	0.0352511	1.10547	1.01273	1.38013	1.10837	4.11023	3.60284	5.62256	4.31211	10.7415	10.3096	16.1174	17.5609
32.548	0.418822	0.385009	1.84485	1.62711	1.91272	1.35209	4.75061	4.16506	6.18298	4.83748	11.7943	12.1962	16.5585	18.582	-0.0286875	0.037231	1.1073	1.01762	1.38757	1.11515	4.12378	3.61621	5.64587	4.33134	10.7863	10.3403	16.1561	17.6029
32.648	0.426757	0.387307	1.84863	1.63279	1.91089	1.35936	4.75439	4.17905	6.19507	4.85744	11.8257	12.2274	16.5999	18.6245	-0.0324712	0.0392108	1.11108	1.02251	1.39941	1.12193	4.14343	3.62957	5.66357	4.35056	10.8157	10.371	16.1897	17.645
32.748	0.438355	0.389605	1.85461	1.63848	1.91834	1.36664	4.7738	4.19303	6.21228	4.87741	11.8531	12.2586	16.6444	18.6669	-0.028686	0.0411899	1.12268	1.0274	1.41125	1.12871	4.15295	3.64293	5.68884	4.36978	10.8412	10.4016	16.2343	17.687
32.848	0.440551	0.391903	1.85852	1.64416	1.92834	1.37391	4.79919	4.20701	6.24548	4.89737	11.89	12.2898	16.6857	18.7094	-0.0186777	0.043169	1.13269	1.03228	1.41296	1.13548	4.16187	3.65629	5.71033	4.389	10.88	10.4323	16.2889	17.729
32.948	0.443115	0.394201	1.85181	1.64984	1.91357	1.38118	4.80591	4.221	6.24853	4.91733	11.9224	12.321	16.739	18.7518	-0.0161138	0.0451478	1.14307	1.03717	1.41968	1.14226	4.17871	3.66965	5.72876	4.40822	10.9143	10.463	16.3311	17.771
33.048	0.440673	0.396498	1.85644	1.65552	1.92236	1.38845	4.82886	4.23498	6.28442	4.93728	11.947	12.3522	16.793	18.7943	-0.0185552	0.0471259	1.15234	1.04206	1.42285	1.14904	4.19397	3.683	5.74365	4.42744	10.9446	10.4937	16.3828	17.813
33.148	0.451782	0.398794	1.86438	1.6612	1.93591	1.39572	4.84412	4.24896	6.29651	4.95724	11.9857	12.3835	16.84	18.8367	-0.00745	0.0491039	1.15417	1.04695	1.43079	1.15581	4.20288	3.69636	5.77112	4.44665	10.9799	10.5244	16.4298	17.855
33.248	0.458985	0.401091	1.86499	1.66688	1.93701	1.40299	4.86475	4.26294	6.32251	4.97719	12.022	12.4147	16.8796	18.8791	-0.000244	0.0510813	1.15698	1.05183	1.43921	1.16258	4.21973	3.70971	5.78174	4.46586	11.0139	10.555	16.4717	17.897
33.348	0.469725	0.403387	1.87427	1.67256	1.9458	1.41026	4.8833	4.27691	6.34912	4.99714	12.0562	12.4459	16.9336	18.9215	-0.00684	0.0530586	1.16211	1.05672	1.44238	1.16935	4.21301	3.72306	5.80225	4.48506	11.0308	10.5857	16.5276	17.939
33.448	0.461058	0.405682	1.87121	1.67824	1.94519	1.41752	4.88074	4.29089	6.36194	5.01709	12.0809	12.4771	16.9838	18.9639	-0.00989	0.0550356	1.15735	1.0616	1.44543	1.17612	4.21936	3.73641	5.81335	4.50427	11.0492	10.6164	16.5656	17.981
33.548	0.463745	0.407977	1.85852	1.68392	1.94373	1.42479	4.88538	4.30486	6.37268	5.03703	12.0934	12.5082	17.0157	19.0063	-0.0108647	0.0570119	1.15027	1.06648	1.44446	1.18289	4.24207	3.74976	5.8197	4.52347	11.0736	10.647	16.5995	18.023
33.648	0.466674	0.410272	1.86902	1.68959	1.95276	1.43205	4.89587	4.31884	6.38123	5.05697	12.1351	12.5394	17.0714	19.0487	-0.00818	0.0589881	1.15515	1.07137	1.44714	1.18966	4.24695	3.7631	5.82507	4.54266	11.1097	10.6777	16.6495	18.0649
33.748	0.481324	0.412567	1.88367	1.69527	1.96326	1.43931	4.91052	4.33281	6.40613	5.07691	12.1693	12.5706	17.1075	19.0911	-0.00525	0.0609637	1.16565	1.07625	1.46179	1.19642	4.25842	3.77645	5.84119	4.56186	11.1515	10.7084	16.6935	18.1069
33.848	0.487426	0.414861	1.88977	1.70095	1.96936	1.44657	4.91882	4.34678	6.40564	5.09685	12.1949	12.6018	17.1503	19.1335	0.00452	0.0629393	1.1698	1.08113	1.47156	1.20319	4.2666	3.78979	5.87048	4.58105	11.1808	10.739	16.7362	18.1488
33.948	0.487304	0.417155	1.89746	1.70662	1.9751	1.45383	4.92041	4.36075	6.43335	5.11679	12.2222	12.633	17.217	19.1758	0.00464	0.0649144	1.17749	1.08601	1.47974	1.20995	4.28296	3.80313	5.87866	4.60024	11.2202	10.7696	16.7756	18.1908
34.048	0.501709	0.419448	1.90015	1.7123	1.9895	1.46109	4.94653	4.37471	6.4436	5.13672	12.2622	12.6641	17.2585	19.2182	0.00757	0.0668889	1.18823	1.09089	1.47827	1.21672	4.29773	3.81647	5.89673	4.61943	11.25	10.8003	16.825	18.2327
34.148	0.499146	0.421741	1.91296	1.71797	1.99866	1.46835	4.95569	4.38868	6.47229	5.15665	12.2848	12.6953	17.3185	19.2605	0.0218506	0.0688634	1.19128	1.09577	1.49109	1.22348	4.32178	3.82981	5.92126	4.63862	11.2767	10.8309	16.8807	18.2746
34.248	0.507568	0.424033	1.92969	1.72365	2.01489	1.47561	4.97974	4.40264	6.49463	5.17658	12.3323	12.7265	17.3738	19.3029	0.0366211	0.0708372	1.20752	1.10065	1.5	1.23024	4.33154	3.84315	5.94946	4.6578	11.3279	10.8616	16.9402	18.3166
34.348	0.511719	0.426326	1.92188	1.72932	2.02466	1.48286	4.99561	4.4166	6.49463	5.19651	12.3616	12.7576	17.4226	19.3452	0.0407715	0.072811	1.22339	1.10553	1.50562	1.23699	4.35645	3.85648	5.96729	4.67698	11.3596	10.8922	16.9854	18.3585
34.448	0.52246	0.428618	1.92895	1.73499	2.0415	1.49012	5.00269	4.43057	6.50952	5.21643	12.3943	12.7888	17.4707	19.3876	0.0437002	0.0747844	1.23047	1.11041	1.52246	1.24375	4.36584	3.86981	5.9939	4.69616	11.3997	10.9228	17.0488	18.4004
34.548	0.518432	0.430909	1.93054	1.74067	2.04358	1.49737	5.00427	4.44453	6.52087	5.23635	12.4154	12.82	17.5272	19.4299	0.0340567	0.0767571	1.23205	1.11528	1.5282	1.25051	4.36621	3.88314	6.00159	4.71533	11.4249	10.9534	17.0858	18.4423
34.648	0.512939	0.4332	1.93091	1.74634	2.03979	1.50462	5.01831	4.45848	6.53467	5.25627	12.4526	12.8511	17.5605	19.4722	0.0358882	0.0787298	1.23437	1.12016	1.51685	1.25726	4.38355	3.89648	6.01123	4.7345	11.4622	10.9841	17.1272	18.4842
34.748	0.522217	0.435491	1.93042	1.75201	2.04541	1.51187	5.03735	4.47244	6.56372	5.27619	12.4819	12.8823	17.6189	19.5145	0.0434575	0.0807018	1.22827	1.12504	1.53174	1.26402	4.38965	3.9098	6.03271	4.75367	11.4893	11.0147	17.1719	18.526
34.848	0.518554	0.437782	1.94043	1.75768	2.04932	1.51912	5.03979	4.48639	6.57983	5.2961	12.5171	12.9134	17.666	19.5568	0.0397944	0.0826738	1.22656	1.12991	1.54224	1.27077	4.40698	3.92313	6.03662	4.77284	11.5132	11.0453	17.2246	18.5679
34.948	0.535888	0.440072	1.95019	1.76335	2.06103	1.52637	5.05713	4.50035	6.59692	5.31602	12.5483	12.9445	17.7146	19.5991	0.0515132	0.0846454	1.23218	1.13479	1.54785	1.27752	4.41772	3.93646	6.06787	4.792	11.5557	11.0759	17.2754	18.6098
35.048	0.544921	0.442361	1.95532	1.76902	2.05444	1.53361	5.07568	4.5143	6.61987	5.33592	12.5884	12.9757	17.7532	19.6414	0.0622549	0.0866163	1.24902	1.13966	1.55664	1.28427	4.43054	3.94978	6.08838	4.81117	11.5901	11.1065	17.3369	18.6516
35.148	0.537964	0.444651	1.94812	1.77469	2.0531	1.54086	5.08044	4.52825	6.62268	5.35583	12.6168	13.0068	17.7909	19.6837	0.0496826	0.0885872	1.24963	1.14453	1.5614	1.29102	4.45459	3.9631	6.09729	4.83032	11.6107	11.1371	17.3771	18.6935
35.248	0.55835	0.446939	1.96484	1.78035	2.06982	1.54811	5.10889	4.5422	6.65063	5.37574	12.6526	13.0379	17.8506	19.7259	0.0581055	0.0905575	1.2644	1.1494	1.57593	1.29777	4.46265	3.97642	6.11353	4.84948	11.6409	11.1677	17.4324	18.7353
35.348	0.56079	0.449228	1.96875	1.78602	2.06592	1.55535	5.12061	4.55615	6.65503	5.39564	12.6802	13.0691	17.8936	19.7682	0.0624986	0.0925276	1.26831	1.15427	1.58594	1.30451	4.46973	3.98974	6.12964	4.86863	11.6741	11.1983	17.4912	18.7772
35.448	0.559326	0.451517	1.96216	1.79169	2.07056	1.56259	5.12573	4.5701	6.65576	5.41554	12.7068	13.1002	17.926	19.8105	0.0400386	0.0944975	1.25195	1.15915	1.58496	1.31126	4.4823	4.00306	6.12671	4.88778	11.689	11.2289	17.5237	18.819
35.548	0.568237	0.453804	1.97058	1.79736	2.08557	1.56983	5.13611	4.58404	6.67834	5.43544	12.7367	13.1313	17.962	19.8527	0.0426021	0.0964666	1.25671	1.16402	1.59387	1.318	4.48889	4.01637	6.14685	4.90693	11.7189	11.2594	17.5714	18.8608
35.648	0.57727	0.456092	1.97961	1.80302	2.0885	1.57707	5.15295	4.59799	6.70642	5.45533	12.775	13.1624	18.0096	19.895	0.0496817	0.0984358	1.25964	1.16889	1.58508	1.32474	4.50488	4.02968	6.15588	4.92607	11.7589	11.29	17.619	18.9026
35.748	0.573243	0.458379	1.97168	1.80869	2.09229	1.58431	5.15479	4.61193	6.70874	5.47522	12.8081	13.1935	18.0452	19.9372	0.041749	0.100404	1.25781	1.17375	1.58887	1.33149	4.50659	4.043	6.16748	4.94522	11.7981	11.3206	17.6777	18.9444
35.848	0.579101	0.460666	1.97754	1.81435	2.09253	1.59155	5.1687	4.62587	6.72436	5.49512	12.8354	13.2247	18.0742	19.9795	0.0439448	0.102373	1.25952	1.17862	1.59106	1.33822	4.52588	4.0563	6.18506	4.96436	11.8198	11.3512	17.7134	18.9862
35.948	0.575195	0.462952	1.98535	1.82002	2.09985	1.59879	5.17603	4.63981	6.74341	5.51501	12.8823	13.2558	18.1309	20.0217	0.0493159	0.104341	1.26733	1.18349	1.59839	1.34496	4.53808	4.06961	6.20068	4.98349	11.8389	11.3817	17.7537	19.028
36.048	0.586913	0.465238	1.99145	1.82568	2.11206	1.60602	5.20361	4.65375	6.76343	5.53489	12.9116	13.2869	18.1855	20.0639	0.05371	0.106308	1.27344	1.18836	1.60083	1.3517	4.54675	4.08292	6.2185	5.00263	11.886	11.4123	17.7993	19.0698
36.148	0.576538	0.467524	1.98059	1.83134	2.11829	1.61326	5.21814	4.66768	6.77771	5.55478	12.9342	13.318	18.2277	20.1061	0.0389404	0.108275	1.27039	1.19322	1.60144	1.35844	4.55908	4.09623	6.21912	5.02176	11.9066	11.4429	17.8466	19.1116
36.248	0.584717	0.469809	1.98926	1.837	2.12549	1.62049	5.23291	4.68162	6.79053	5.57466	12.9741	13.3491	18.2791	20.1483	0.043457	0.110242	1.27905	1.19809	1.61621	1.36517	4.56348	4.10953	6.24561	5.04089	11.9426	11.4734	17.9121	19.1534
36.348	0.592772	0.472094	1.99121	1.84266	2.12378	1.62772	5.24854	4.69555	6.80835	5.59454	12.9956	13.3801	18.3225	20.1905	0.0478501	0.112209	1.281	1.20295	1.62012	1.37191	4.56714	4.12283	6.26343	5.06001	11.9624	11.504	17.9551	19.1951
36.448	0.577392	0.474379	1.99316	1.84833	2.11963	1.63495	5.24292	4.70948	6.8042	5.61441	13.0232	13.4112	18.3496	20.2327	0.0375972	0.114175	1.28101	1.20782	1.62573	1.37864	4.58484	4.13613	6.26147	5.07914	11.9895	11.5345	17.998	19.2369
36.548	0.577026	0.476663	1.98938	1.85399	2.13123	1.64218	5.25818	4.72342	6.83166	5.63429	13.058	13.4423	18.412	20.2749	0.0379634	0.116141	1.28894	1.21268	1.6261	1.38537	4.59937	4.14943	6.28064	5.09826	12.0206	11.5651	18.0333	19.2786
36.648	0.583984	0.478947	2.00146	1.85965	2.14014	1.64941	5.27271	4.73734	6.84009	5.65416	13.1018	13.4734	18.46	20.3171	0.0366211	0.118106	1.2937	1.21754	1.62891	1.3921	4.61975	4.16273	6.29736	5.11738	12.0588	11.5956	18.0752	19.3204
36.748	0.590942	0.48123	2.01086	1.86531	2.15271	1.65664	5.30115	4.75127	6.86292	5.67403	13.1344	13.5045	18.5233	20.3592	0.0496826	0.120071	1.30066	1.2224	1.63586	1.39883	4.6228	4.17602	6.31604	5.13649	12.0909	11.6261	18.1288	19.3621
36.848	0.581787	0.483513	2.01343	1.87096	2.15015	1.66386	5.31006	4.7652	6.86768	5.69389	13.1626	13.5355	18.5635	20.4014	0.0405269	0.122036	1.30127	1.22727	1.62671	1.40556	4.64526	4.18932	6.31665	5.15561	12.1191	11.6567	18.1709	19.4038
36.948	0.591064	0.485796	2.03027	1.87662	2.15478	1.67109	5.31885	4.77912	6.89014	5.71376	13.2104	13.5666	18.6113	20.4435	0.0554194	0.124	1.3125	1.23213	1.65527	1.41228	4.65686	4.20261	6.34741	5.17472	12.1597	11.6872	18.2324	19.4456
37.048	0.585083	0.488078	2.03015	1.88228	2.16638	1.67831	5.3385	4.79305	6.90027	5.73362	13.2435	13.5977	18.6737	20.4857	0.0555415	0.125964	1.31433	1.23699	1.65515	1.41901	4.67163	4.2159	6.36658	5.19383	12.1847	11.7177	18.2599	19.4873
37.148	0.591553	0.49036	2.03516	1.88794	2.177	1.68553	5.34497	4.80697	6.91235	5.75348	13.2817	13.6287	18.7119	20.5278	0.0541992	0.127928	1.31519	1.24185	1.66577	1.42573	4.68616	4.22919	6.38135	5.21293	12.2148	11.7482	18.3115	19.529
37.248	0.589233	0.492642	2.04407	1.89359	2.1842	1.69275	5.37537	4.82089	6.93518	5.77334	13.3138	13.6598	18.7655	20.57	0.0731201	0.129891	1.3241	1.2467	1.67297	1.43245	4.71252	4.24248	6.40759	5.23203	12.255	11.7788	18.3632	19.5707
37.348	0.593628	0.494923	2.05457	1.89925	2.1947	1.69998	5.39001	4.83481	6.9574	5.79319	13.3597	13.6909	18.8192	20.6121	0.0758057	0.131854	1.32898	1.25156	1.67786	1.43917	4.72437	4.25576	6.42444	5.25113	12.3029	11.8093	18.4249	19.6123
37.448	0.595703	0.497204	2.07202	1.9049	2.21216	1.70719	5.41162	4.84873	6.98096	5.81305	13.3931	13.7219	18.8721	20.6542	0.0815425	0.133817	1.33447	1.25642	1.68921	1.4459	4.73889	4.26904	6.44385	5.27023	12.3398	11.8398	18.4773	19.654
37.548	0.60437	0.499484	2.07556	1.91056	2.2157	1.71441	5.42639	4.86264	6.99548	5.8329	13.433	13.7529	18.9315	20.6963	0.0906982	0.135779	1.34363	1.26127	1.69836	1.45261	4.75732	4.28233	6.46033	5.28932	12.3783	11.8703	18.5292	19.6957
37.648	0.607421	0.501765	2.07007	1.91621	2.22192	1.72163	5.44092	4.87656	7.03345	5.85275	13.469	13.784	18.9988	20.7384	0.0895987	0.137741	1.35596	1.26613	1.71069	1.45933	4.77051	4.29561	6.48291	5.30841	12.4045	11.9008	18.5754	19.7374
37.748	0.608399	0.504044	2.07153	1.92187	2.22339	1.72884	5.44189	4.89047	7.04053	5.87259	13.49	13.815	19.0393	20.7805	0.088624	0.139702	1.35547	1.27099	1.71021	1.46605	4.776	4.30889	6.49561	5.3275	12.4329	11.9313	18.6096	19.779
37.848	0.616333	0.506324	2.07898	1.92752	2.23083	1.73606	5.45349	4.90438	7.06384	5.89244	13.5248	13.8461	19.0724	20.8226	0.0904536	0.141663	1.3573	1.27584	1.70593	1.47276	4.78601	4.32216	6.51135	5.34659	12.4642	11.9618	18.6561	19.8207
37.948	0.608521	0.508603	2.08704	1.93317	2.24451	1.74327	5.47522	4.91829	7.08533	5.91228	13.5697	13.8771	19.1112	20.8647	0.106079	0.143624	1.36682	1.28069	1.72156	1.47948	4.80615	4.33544	6.53064	5.36567	12.4955	11.9923	18.7032	19.8623
38.048	0.620849	0.510881	2.09375	1.93882	2.24927	1.75048	5.48755	4.9322	7.11352	5.93211	13.602	13.9081	19.1514	20.9068	0.105224	0.145585	1.36792	1.28555	1.73242	1.48619	4.80957	4.34871	6.54565	5.38475	12.5217	12.0227	18.749	19.9039
38.148	0.629882	0.51316	2.08716	1.94447	2.26636	1.75769	5.50073	4.94611	7.13037	5.95195	13.6208	13.9392	19.207	20.9488	0.100341	0.147545	1.36719	1.2904	1.73535	1.4929	4.8335	4.36199	6.55615	5.40383	12.5522	12.0532	18.8047	19.9456
38.248	0.634766	0.515438	2.09375	1.95012	2.27856	1.7649	5.52466	4.96002	7.15479	5.97178	13.6624	13.9702	19.2742	20.9909	0.113038	0.149504	1.3855	1.29525	1.75171	1.49961	4.84656	4.37526	6.57666	5.42291	12.5784	12.0837	18.8486	19.9872
38.348	0.641723	0.517715	2.10437	1.95577	2.27795	1.77211	5.53577	4.97392	7.18689	5.99162	13.6949	14.0012	19.338	21.0329	0.113891	0.151464	1.39246	1.3001	1.76257	1.50632	4.86401	4.38852	6.58362	5.44198	12.6222	12.1142	18.9142	20.0288
38.448	0.635742	0.519993	2.11255	1.96142	2.28369	1.77932	5.5415	4.98783	7.20483	6.01145	13.7222	14.0322	19.3674	21.075	0.117919	0.153423	1.38647	1.30495	1.77075	1.51303	4.88049	4.40179	6.59741	5.46105	12.6499	12.1446	18.9553	20.0704
38.548	0.644409	0.522269	2.10901	1.96707	2.28064	1.78653	5.55017	5.00173	7.21521	6.03127	13.7601	14.0632	19.4049	21.117	0.120971	0.155381	1.39514	1.3098	1.77331	1.51973	4.89746	4.41506	6.6134	5.48011	12.6915	12.1751	19.0009	20.112
38.648	0.641845	0.524546	2.12402	1.97272	2.2915	1.79373	5.56885	5.01563	7.23779	6.0511	13.7905	14.0942	19.4749	21.159	0.119628	0.15734	1.40234	1.31465	1.78809	1.52644	4.91162	4.42832	6.64014	5.49918	12.7122	12.2056	19.0452	20.1536
38.748	0.642579	0.526822	2.12305	1.97837	2.29834	1.80093	5.57935	5.02953	7.25244	6.07092	13.8225	14.1252	19.532	21.2011	0.130616	0.159298	1.40869	1.3195	1.79883	1.53314	4.9292	4.44159	6.66235	5.51824	12.7385	12.236	19.0828	20.1952
38.848	0.648438	0.529098	2.12891	1.98401	2.30981	1.80814	5.60303	5.04342	7.27563	6.09074	13.8694	14.1562	19.5867	21.2431	0.128662	0.161255	1.4187	1.32435	1.8103	1.53984	4.95764	4.45485	6.68213	5.5373	12.7756	12.2665	19.1221	20.2367
38.948	0.643676	0.531373	2.13586	1.98966	2.32092	1.81534	5.6217	5.05732	7.30408	6.11056	13.9	14.1872	19.6505	21.2851	0.129516	0.163213	1.42566	1.32919	1.81165	1.54655	4.97119	4.46811	6.70276	5.55635	12.8136	12.2969	19.1798	20.2783
39.048	0.653076	0.533648	2.14526	1.99531	2.32471	1.82254	5.63696	5.07121	7.31982	6.13037	13.9485	14.2182	19.7051	21.3271	0.127685	0.165169	1.43506	1.33404	1.82104	1.55325	4.98816	4.48136	6.71997	5.57541	12.8352	12.3274	19.2227	20.3199
39.148	0.667846	0.535923	2.1427	2.00095	2.33533	1.82974	5.64807	5.08511	7.34216	6.15018	13.9847	14.2492	19.745	21.3691	0.134399	0.167126	1.44421	1.33889	1.8302	1.55995	5.00171	4.49462	6.74084	5.59446	12.8654	12.3578	19.2841	20.3614
39.248	0.658448	0.538197	2.14453	2.0066	2.34692	1.83693	5.66724	5.099	7.35791	6.16999	14.022	14.2802	19.7976	21.4111	0.149903	0.169082	1.44605	1.34373	1.83203	1.56664	5.01318	4.50787	6.75415	5.61351	12.9045	12.3882	19.3059	20.4029
39.348	0.656005	0.540471	2.15601	2.01224	2.35889	1.84413	5.6792	5.11289	7.37915	6.1898	14.051	14.3112	19.8486	21.4531	0.150146	0.171038	1.45752	1.34858	1.84351	1.57334	5.02441	4.52112	6.77783	5.63255	12.9299	12.4187	19.3621	20.4445
39.448	0.667236	0.542745	2.16724	2.01788	2.36963	1.85133	5.69775	5.12678	7.39819	6.2096	14.0935	14.3422	19.8887	21.495	0.153076	0.172994	1.46875	1.35342	1.86401	1.58003	5.04077	4.53438	6.79639	5.65159	12.9583	12.4491	19.416	20.486
39.548	0.660156	0.545018	2.17749	2.02353	2.38403	1.85852	5.71826	5.14066	7.42798	6.22941	14.1233	14.3731	19.9385	21.537	0.16748	0.174948	1.47339	1.35826	1.88452	1.58673	5.0592	4.54762	6.82251	5.67064	12.9922	12.4795	19.4734	20.5275
39.648	0.667114	0.547291	2.18494	2.02917	2.38928	1.86571	5.72888	5.15455	7.45642	6.24921	14.1676	14.4041	19.9901	21.5789	0.168823	0.176903	1.48035	1.3631	1.89563	1.59342	5.06812	4.56087	6.84729	5.68967	13.0365	12.51	19.5292	20.569
39.748	0.667725	0.549563	2.17944	2.03481	2.39209	1.87291	5.74561	5.16843	7.47705	6.269	14.1899	14.4351	20.0457	21.6209	0.177247	0.178858	1.48315	1.36795	1.89063	1.60011	5.09338	4.57412	6.86353	5.70871	13.0608	12.5404	19.5771	20.6105
39.848	0.681763	0.551835	2.18542	2.04045	2.40369	1.8801	5.77087	5.18232	7.49841	6.2888	14.2211	14.466	20.1102	21.6628	0.181519	0.180812	1.48328	1.37279	1.90417	1.6068	5.10986	4.58736	6.87561	5.72774	13.0961	12.5708	19.6298	20.652
39.948	0.694091	0.554107	2.19824	2.04609	2.40478	1.88729	5.78369	5.1962	7.521	6.30859	14.2651	14.497	20.158	21.7048	0.188231	0.182766	1.4956	1.37763	1.91699	1.61349	5.11816	4.60061	6.90186	5.74677	13.1299	12.6012	19.6775	20.6935
40.048	0.680908	0.556378	2.19824	2.05173	2.39917	1.89448	5.7915	5.21008	7.52319	6.32838	14.2925	14.5279	20.1897	21.7467	0.176513	0.184719	1.48437	1.38247	1.89966	1.62018	5.1228	4.61385	6.90796	5.76579	13.1536	12.6316	19.7092	20.735
40.148	0.685547	0.558649	2.21265	2.05737	2.40381	1.90166	5.81201	5.22396	7.54517	6.34817	14.3381	14.5589	20.2273	21.7886	0.179443	0.186672	1.48901	1.3873	1.9043	1.62686	5.14978	4.62709	6.92603	5.78482	13.1917	12.662	19.7585	20.7765
40.248	0.699097	0.56092	2.22839	2.06301	2.41321	1.90885	5.82361	5.23783	7.57434	6.36796	14.3949	14.5898	20.2916	21.8305	0.187378	0.188624	1.50427	1.39214	1.92151	1.63355	5.15332	4.64032	6.95544	5.80384	13.2365	12.6924	19.7938	20.8179
40.348	0.696533	0.56319	2.22583	2.06865	2.42041	1.91603	5.83838	5.25171	7.5896	6.38774	14.4119	14.6208	20.3225	21.8724	0.172607	0.190577	1.50781	1.39698	1.9231	1.64023	5.16943	4.65356	6.9646	5.82285	13.2534	12.7228	19.8225	20.8594
40.448	0.710693	0.56546	2.24194	2.07429	2.43701	1.92322	5.86279	5.26558	7.61352	6.40752	14.4536	14.6517	20.3816	21.9143	0.175537	0.192529	1.51831	1.40182	1.93921	1.64692	5.19006	4.66679	6.98853	5.84187	13.2988	12.7532	19.8777	20.9008
40.548	0.712036	0.567729	2.2511	2.07992	2.44006	1.9304	5.86584	5.27946	7.63806	6.4273	14.4818	14.6827	20.4279	21.9562	0.176391	0.19448	1.52136	1.40665	1.95398	1.6536	5.19812	4.68002	7.01526	5.86088	13.3392	12.7836	19.9296	20.9423
40.648	0.713989	0.569999	2.25305	2.08556	2.44568	1.93758	5.88318	5.29333	7.6615	6.44708	14.5192	14.7136	20.453	21.9981	0.184448	0.196431	1.52893	1.41149	1.9657	1.66028	5.21667	4.69326	7.01721	5.87989	13.3741	12.8139	19.9767	20.9837
40.748	0.709106	0.572267	2.26355	2.09119	2.45862	1.94476	5.89612	5.3072	7.68225	6.46685	14.5707	14.7445	20.505	22.04	0.183228	0.198382	1.53625	1.41632	1.96887	1.66696	5.22327	4.70649	7.04138	5.8989	13.4047	12.8443	20.0343	21.0251
40.848	0.700562	0.574536	2.26477	2.09683	2.45935	1.95194	5.90466	5.32106	7.68909	6.48662	14.5914	14.7754	20.5448	22.0819	0.184448	0.200333	1.53088	1.42116	1.96399	1.67363	5.23816	4.71971	7.05408	5.9179	13.4366	12.8747	20.0685	21.0666
40.948	0.708862	0.576804	2.27136	2.10246	2.4779	1.95912	5.9176	5.33493	7.70935	6.50639	14.6351	14.8064	20.6141	22.1237	0.19104	0.202283	1.54578	1.42599	1.96667	1.68031	5.25647	4.73294	7.0885	5.93691	13.4711	12.905	20.118	21.108
41.048	0.702514	0.579072	2.27844	2.1081	2.48498	1.96629	5.93591	5.3488	7.72815	6.52616	14.6696	14.8373	20.6642	22.1656	0.196167	0.204232	1.54675	1.43082	1.97375	1.68699	5.26831	4.74616	7.1012	5.95591	13.507	12.9354	20.1681	21.1494
41.148	0.692382	0.581339	2.28052	2.11373	2.48096	1.97347	5.94409	5.36266	7.74365	6.54592	14.7029	14.8682	20.6992	22.2074	0.186523	0.206182	1.54883	1.43565	1.97583	1.69366	5.28699	4.75939	7.10327	5.9749	13.5347	12.9658	20.2229	21.1908
41.248	0.699341	0.583606	2.28503	2.11936	2.48596	1.98064	5.95642	5.37652	7.76038	6.56568	14.7233	14.8991	20.7489	22.2492	0.181519	0.208131	1.54358	1.44049	1.98035	1.70033	5.2948	4.77261	7.11584	5.9939	13.5724	12.9961	20.255	21.2322
41.348	0.687622	0.585873	2.2948	2.125	2.48596	1.98782	5.97424	5.39038	7.77209	6.58544	14.7601	14.93	20.7899	22.2911	0.1698	0.21008	1.5614	1.44532	1.97473	1.707	5.32068	4.78583	7.12366	6.01288	13.6017	13.0265	20.2941	21.2735
41.448	0.69812	0.588139	2.30334	2.13063	2.51379	1.99499	5.99036	5.40424	7.79602	6.6052	14.808	14.9609	20.8492	22.3329	0.183959	0.212028	1.56018	1.45015	1.99084	1.71367	5.33875	4.79904	7.1593	6.03187	13.6415	13.0568	20.3414	21.3149
41.548	0.700073	0.590405	2.3136	2.13626	2.52771	2.00216	6.01599	5.4181	7.82581	6.62495	14.8317	14.9918	20.9025	22.3747	0.186401	0.213976	1.56433	1.45498	1.98767	1.72034	5.35303	4.81226	7.18494	6.05086	13.6713	13.0872	20.3944	21.3563
41.648	0.71289	0.59267	2.32788	2.14189	2.53076	2.00933	6.04224	5.43196	7.83447	6.64471	14.877	15.0227	20.9385	22.4165	0.179687	0.215924	1.59033	1.4598	1.99585	1.72701	5.36304	4.82547	7.2019	6.06984	13.7051	13.1175	20.4519	21.3976
41.748	0.710694	0.594935	2.33789	2.14752	2.54028	2.0165	6.05225	5.44581	7.8501	6.66445	14.9224	15.0536	20.989	22.4583	0.183106	0.217871	1.59839	1.46463	2.00586	1.73368	5.38733	4.83869	7.21704	6.08882	13.75	13.1478	20.4932	21.439
41.848	0.715942	0.5972	2.35046	2.15315	2.55139	2.02367	6.06482	5.45966	7.87048	6.6842	14.9489	15.0845	21.0468	22.5001	0.18811	0.219818	1.59363	1.46946	2.01843	1.74034	5.40381	4.8519	7.2301	6.1078	13.7941	13.1782	20.5392	21.4803
41.948	0.722656	0.599465	2.36133	2.15878	2.5581	2.03083	6.09302	5.47352	7.89868	6.70395	14.9807	15.1154	21.0986	22.5419	0.204589	0.221764	1.60229	1.47429	2.01758	1.74701	5.42358	4.86511	7.25024	6.12677	13.8418	13.2085	20.6003	21.5216
42.048	0.716796	0.601728	2.36719	2.1644	2.56958	2.038	6.11645	5.48737	7.91284	6.72369	15.0239	15.1463	21.1436	22.5837	0.20874	0.223711	1.61377	1.47911	2.02344	1.75367	5.44031	4.87831	7.27392	6.14575	13.8733	13.2388	20.655	21.563
42.148	0.725463	0.603992	2.38342	2.17003	2.57507	2.04516	6.13123	5.50122	7.92908	6.74343	15.0602	15.1771	21.1876	22.6255	0.213745	0.225657	1.62292	1.48394	2.03406	1.76033	5.44983	4.89152	7.29846	6.16471	13.9034	13.2692	20.7169	21.6043
42.248	0.737427	0.606255	2.38782	2.17566	2.57263	2.05232	6.14929	5.51506	7.96057	6.76317	15.0892	15.208	21.2479	22.6672	0.211548	0.227602	1.62878	1.48876	2.04602	1.76699	5.47058	4.90473	7.30798	6.18368	13.9447	13.2995	20.7792	21.6456
42.348	0.738402	0.608518	2.39831	2.18129	2.59338	2.05948	6.15564	5.52891	7.98474	6.7829	15.1254	15.2389	21.3094	22.709	0.230102	0.229547	1.63342	1.49358	2.05066	1.77365	5.47522	4.91793	7.34412	6.20264	13.9711	13.3298	20.8312	21.6869
42.448	0.737426	0.610781	2.40344	2.18691	2.59021	2.06664	6.16077	5.54275	7.99573	6.80264	15.1674	15.2697	21.3536	22.7507	0.227416	0.231492	1.64221	1.49841	2.05383	1.78031	5.49475	4.93113	7.34924	6.2216	14.007	13.3601	20.8615	21.7282
42.548	0.723755	0.613043	2.41882	2.19254	2.59241	2.0738	6.17224	5.5566	8.00549	6.82237	15.191	15.3006	21.3944	22.7925	0.217407	0.233436	1.64636	1.50323	2.05188	1.78696	5.5249	4.94433	7.36462	6.24056	14.025	13.3904	20.8986	21.7695
42.648	0.738037	0.615305	2.42187	2.19816	2.60669	2.08096	6.20239	5.57044	8.01978	6.84209	15.2192	15.3315	21.4482	22.8342	0.232177	0.235381	1.65503	1.50805	2.05444	1.79362	5.53992	4.95753	7.38721	6.25952	14.0645	13.4207	20.9519	21.8107
42.748	0.735474	0.617566	2.42859	2.20378	2.61389	2.08812	6.20959	5.58428	8.03479	6.86182	15.2572	15.3623	21.4806	22.8759	0.23108	0.237324	1.65979	1.51287	2.06531	1.80027	5.5448	4.97072	7.40002	6.27847	14.0948	13.451	20.9962	21.852
42.848	0.728637	0.619828	2.43762	2.20941	2.61877	2.09527	6.21448	5.59812	8.05139	6.88154	15.2821	15.3932	21.5204	22.9176	0.228393	0.239268	1.67078	1.51769	2.07629	1.80692	5.54858	4.98392	7.42029	6.29742	14.1332	13.4813	21.0323	21.8933
42.948	0.732422	0.622088	2.44507	2.21503	2.62817	2.10243	6.24146	5.61196	8.07837	6.90126	15.3127	15.424	21.5693	22.9594	0.232178	0.241211	1.67456	1.52251	2.07788	1.81357	5.58264	4.99711	7.43799	6.31636	14.1682	13.5116	21.0925	21.9345
43.048	0.749144	0.624349	2.47156	2.22065	2.64538	2.10958	6.26428	5.62579	8.10119	6.92098	15.3531	15.4549	21.6307	23.0011	0.242796	0.243153	1.69494	1.52733	2.09875	1.82022	5.58325	5.0103	7.46643	6.33531	14.2045	13.5418	21.1544	21.9758
43.148	0.735351	0.626609	2.47559	2.22627	2.63721	2.11673	6.27393	5.63963	8.11865	6.9407	15.3823	15.4857	21.6719	23.0428	0.233398	0.245096	1.69336	1.53215	2.09473	1.82687	5.6001	5.02349	7.47217	6.35425	14.2219	13.5721	21.1836	22.017
43.248	0.741456	0.628868	2.47949	2.23189	2.64893	2.12388	6.29346	5.65346	8.14575	6.96041	15.4136	15.5165	21.7266	23.0844	0.239014	0.247037	1.70093	1.53697	2.09473	1.83352	5.6084	5.03668	7.49561	6.37319	14.2593	13.6024	21.2441	22.0582
43.348	0.743164	0.631128	2.48169	2.23752	2.65112	2.13103	6.29565	5.66729	8.16187	6.98012	15.447	15.5474	21.7617	23.1261	0.229492	0.248979	1.70874	1.54178	2.10254	1.84017	5.61316	5.04986	7.50562	6.39212	14.2922	13.6327	21.2854	22.0995
43.448	0.746215	0.633387	2.49206	2.24314	2.65955	2.13818	6.3158	5.68112	8.17834	6.99983	15.4713	15.5782	21.8097	23.1678	0.232055	0.25092	1.70593	1.5466	2.11707	1.84681	5.6239	5.06305	7.52209	6.41106	14.3226	13.6629	21.3348	22.1407
43.548	0.749145	0.635645	2.49914	2.24875	2.66858	2.14533	6.33264	5.69495	8.19275	7.01953	15.4974	15.609	21.8634	23.2095	0.24475	0.252861	1.70886	1.55142	2.11438	1.85346	5.62744	5.07623	7.53284	6.42999	14.3624	13.6932	21.3695	22.1819
43.648	0.735352	0.637903	2.49707	2.25437	2.67212	2.15247	6.33057	5.70878	8.2085	7.03924	15.5327	15.6398	21.9099	23.2511	0.240723	0.254802	1.7124	1.55623	2.11792	1.8601	5.65784	5.08941	7.5481	6.44891	14.386	13.7235	21.4177	22.2231
43.748	0.744263	0.640161	2.50793	2.25999	2.68152	2.15962	6.3512	5.7226	8.24255	7.05894	15.5668	15.6707	21.964	23.2928	0.255737	0.256742	1.72742	1.56104	2.1366	1.86674	5.66028	5.10259	7.57288	6.46784	14.4144	13.7537	21.4601	22.2643
43.848	0.738403	0.642418	2.5155	2.26561	2.68298	2.16676	6.3551	5.73642	8.26233	7.07864	15.6061	15.7015	22.005	23.3344	0.249878	0.258682	1.73499	1.56586	2.14832	1.87338	5.68115	5.11577	7.58826	6.48676	14.4437	13.784	21.5011	22.3054
43.948	0.75	0.644676	2.51758	2.27122	2.69873	2.1739	6.37817	5.75025	8.27979	7.09834	15.6409	15.7323	22.0537	23.3761	0.251464	0.260621	1.74878	1.57067	2.15625	1.88002	5.68835	5.12894	7.604	6.50568	14.4846	13.8142	21.5574	22.3466
44.048	0.744995	0.646932	2.53406	2.27684	2.69983	2.18105	6.39514	5.76407	8.29626	7.11803	15.6735	15.7631	22.0917	23.4177	0.258667	0.26256	1.75354	1.57548	2.16296	1.88666	5.70593	5.14212	7.62463	6.5246	14.4996	13.8445	21.6036	22.3878
44.148	0.764525	0.649189	2.53821	2.28246	2.71326	2.18819	6.41272	5.77789	8.31994	7.13772	15.7145	15.7939	22.1466	23.4593	0.262572	0.264499	1.76526	1.58029	2.17688	1.89329	5.71362	5.15529	7.64001	6.54351	14.5248	13.8747	21.6503	22.4289
44.248	0.760988	0.651444	2.53613	2.28807	2.69995	2.19532	6.41064	5.79171	8.32959	7.15741	15.7319	15.8247	22.1584	23.5009	0.248781	0.266437	1.76367	1.5851	2.15747	1.89993	5.72998	5.16846	7.64819	6.56242	14.5483	13.9049	21.6877	22.4701
44.348	0.767578	0.6537	2.54883	2.29369	2.70654	2.20246	6.43311	5.80552	8.35376	7.17709	15.7759	15.8555	22.2117	23.5425	0.259521	0.268376	1.77588	1.58991	2.16968	1.90656	5.7489	5.18163	7.66821	6.58133	14.5745	13.9352	21.739	22.5112
44.448	0.770385	0.655955	2.55383	2.2993	2.72327	2.2096	6.44983	5.81934	8.38025	7.19678	15.8004	15.8863	22.2618	23.5841	0.252807	0.270313	1.79065	1.59472	2.18445	1.91319	5.75085	5.1948	7.69104	6.60023	14.6163	13.9654	21.7794	22.5524
44.548	0.776488	0.65821	2.55383	2.30491	2.72888	2.21673	6.45178	5.83315	8.39246	7.21646	15.8353	15.9171	22.3065	23.6257	0.250609	0.272251	1.79675	1.59953	2.18494	1.91982	5.7616	5.20796	7.69885	6.61914	14.642	13.9956	21.8185	22.5935
44.648	0.775513	0.660465	2.55847	2.31053	2.73401	2.22387	6.46423	5.84696	8.39514	7.23614	15.8636	15.9478	22.3409	23.6673	0.242065	0.274188	1.78406	1.60434	2.18347	1.92645	5.77698	5.22113	7.71521	6.63804	14.6722	14.0258	21.8622	22.6346
44.748	0.775513	0.662719	2.56653	2.31614	2.73401	2.231	6.4801	5.86077	8.43201	7.25581	15.9127	15.9786	22.3917	23.7089	0.245972	0.276124	1.79578	1.60915	2.19348	1.93308	5.79175	5.23429	7.73108	6.65693	14.7072	14.056	21.9149	22.6757
44.848	0.781982	0.664973	2.57104	2.32175	2.73486	2.23813	6.49268	5.87458	8.44873	7.27549	15.9465	16.0094	22.4373	23.7504	0.248779	0.278061	1.79663	1.61395	2.19434	1.93971	5.81702	5.24745	7.75513	6.67583	14.728	14.0862	21.9475	22.7168
44.948	0.787963	0.667226	2.5907	2.32736	2.74841	2.24526	6.50842	5.88839	8.45667	7.29516	15.9801	16.0402	22.4825	23.792	0.256713	0.279997	1.80456	1.61876	2.20593	1.94634	5.82202	5.26061	7.78088	6.69472	14.7513	14.1164	21.994	22.7579
45.048	0.798584	0.669479	2.59766	2.33297	2.75342	2.25239	6.51489	5.9022	8.48267	7.31483	16.0061	16.0709	22.5225	23.8335	0.249512	0.281932	1.81104	1.62357	2.21851	1.95296	5.83777	5.27377	7.79517	6.71361	14.7834	14.1466	22.04	22.799
45.148	0.80481	0.671732	2.60559	2.33858	2.76135	2.25952	6.54065	5.916	8.50037	7.3345	16.0494	16.1017	22.5616	23.8751	0.267212	0.283867	1.81726	1.62837	2.23816	1.95958	5.85205	5.28692	7.82458	6.73249	14.8109	14.1768	22.0905	22.8401
45.248	0.819092	0.673984	2.61987	2.34419	2.77197	2.26665	6.55298	5.92981	8.53467	7.35416	16.0776	16.1325	22.6267	23.9166	0.262451	0.285802	1.83154	1.63317	2.24487	1.96621	5.86426	5.30008	7.83936	6.75138	14.8354	14.207	22.1367	22.8812
45.348	0.817626	0.676236	2.61841	2.3498	2.76636	2.27377	6.55347	5.94361	8.54639	7.37382	16.1089	16.1632	22.6721	23.9581	0.262451	0.287737	1.8147	1.63798	2.24902	1.97283	5.87683	5.31323	7.85327	6.77026	14.855	14.2372	22.1777	22.9222
45.448	0.810425	0.678488	2.61926	2.35541	2.76306	2.2809	6.56775	5.95741	8.56116	7.39348	16.139	16.194	22.7238	23.9997	0.265259	0.289671	1.81506	1.64278	2.25964	1.97945	5.88367	5.32638	7.86584	6.78913	14.8754	14.2674	22.2238	22.9633
45.548	0.815551	0.680739	2.62805	2.36101	2.776	2.28802	6.59045	5.97121	8.58752	7.41314	16.1832	16.2247	22.7675	24.0412	0.266478	0.291605	1.83166	1.64758	2.27624	1.98607	5.88342	5.33953	7.88049	6.80801	14.9073	14.2976	22.2753	23.0043
45.648	0.815307	0.68299	2.62781	2.36662	2.77014	2.29514	6.58459	5.985	8.58167	7.43279	16.2047	16.2555	22.8068	24.0827	0.266235	0.293538	1.82019	1.65238	2.27234	1.99268	5.90125	5.35268	7.89197	6.82688	14.9271	14.3278	22.3182	23.0453
45.748	0.813599	0.68524	2.62415	2.37222	2.77405	2.30226	6.59412	5.9988	8.59729	7.45244	16.2357	16.2862	22.8553	24.1242	0.274292	0.295471	1.8241	1.65718	2.28235	1.9993	5.90332	5.36582	7.90979	6.84575	14.9506	14.3579	22.3749	23.0864
45.848	0.804199	0.68749	2.6416	2.37783	2.78174	2.30938	6.62183	6.01259	8.60718	7.4721	16.2712	16.3169	22.9045	24.1657	0.264648	0.297404	1.82617	1.66198	2.28394	2.00591	5.9176	5.37896	7.92358	6.86462	14.9722	14.3881	22.4104	23.1274
45.948	0.796996	0.68974	2.64661	2.38344	2.78674	2.3165	6.62073	6.02639	8.6178	7.49174	16.286	16.3477	22.9425	24.2071	0.261352	0.299336	1.82288	1.66678	2.29309	2.01253	5.92773	5.39211	7.9281	6.88348	14.9906	14.4183	22.4406	23.1684
46.048	0.785156	0.691989	2.63672	2.38904	2.78296	2.32362	6.63232	6.04018	8.63354	7.51139	16.313	16.3784	22.9717	24.2486	0.251953	0.301268	1.82886	1.67158	2.28931	2.01914	5.92773	5.40525	7.948	6.90234	15.0063	14.4484	22.4795	23.2094
46.148	0.794921	0.694239	2.64648	2.39464	2.79028	2.33074	6.64209	6.05397	8.65454	7.53103	16.3367	16.4091	23.0359	24.2901	0.255615	0.3032	1.83862	1.67638	2.29858	2.02575	5.93127	5.41839	7.95728	6.9212	15.0391	14.4786	22.5205	23.2504
46.248	0.796753	0.696487	2.65051	2.40025	2.80042	2.33785	6.65955	6.06776	8.67249	7.55067	16.3715	16.4399	23.0773	24.3315	0.255494	0.305131	1.84265	1.68117	2.30676	2.03236	5.95203	5.43152	7.97522	6.94005	15.0687	14.5087	22.5692	23.2914
46.348	0.807738	0.698735	2.64978	2.40585	2.8053	2.34497	6.68225	6.08154	8.6947	7.57031	16.4174	16.4706	23.1212	24.373	0.25476	0.307062	1.84753	1.68597	2.3075	2.03897	5.95007	5.44466	7.99548	6.95891	15.0931	14.5389	22.6115	23.3324
46.448	0.799682	0.700983	2.64368	2.41145	2.80334	2.35208	6.6803	6.09533	8.70471	7.58994	16.4489	16.5013	23.1449	24.4144	0.258423	0.308993	1.84558	1.69077	2.31165	2.04558	5.97034	5.45779	8.00574	6.97776	15.1261	14.569	22.6486	23.3733
46.548	0.804565	0.703231	2.65613	2.41705	2.81018	2.35919	6.68933	6.10911	8.72327	7.60957	16.4752	16.532	23.202	24.4559	0.267211	0.310923	1.85242	1.69556	2.32043	2.05218	5.98901	5.47092	8.02795	6.9966	15.1586	14.5992	22.6903	23.4143
46.648	0.801758	0.705478	2.66113	2.42265	2.81104	2.3663	6.68604	6.12289	8.74927	7.6292	16.5073	16.5627	23.248	24.4973	0.27417	0.312853	1.84155	1.70036	2.31519	2.05879	5.99792	5.48406	8.03442	7.01545	15.1846	14.6293	22.7246	23.4553
46.748	0.816284	0.707725	2.67004	2.42825	2.82556	2.37341	6.70667	6.13668	8.76233	7.64883	16.5358	16.5934	23.3134	24.5387	0.271362	0.314782	1.85413	1.70515	2.32825	2.06539	6.0105	5.49719	8.0553	7.03429	15.2228	14.6594	22.7821	23.4962
46.848	0.815429	0.709971	2.6748	2.43385	2.83643	2.38052	6.7229	6.15045	8.77881	7.66846	16.5718	16.6241	23.3633	24.5801	0.279785	0.316712	1.86499	1.70994	2.33301	2.07199	6.01355	5.51031	8.07739	7.05313	15.2532	14.6895	22.832	23.5372
46.948	0.822143	0.712218	2.67004	2.43945	2.83948	2.38763	6.73206	6.16423	8.80701	7.68808	16.6078	16.6548	23.4054	24.6215	0.277221	0.318641	1.86218	1.71473	2.34167	2.07859	6.02624	5.52344	8.11169	7.07196	15.2875	14.7197	22.8741	23.5781
47.048	0.821411	0.714463	2.68079	2.44505	2.84045	2.39473	6.75037	6.17801	8.8219	7.7077	16.6461	16.6855	23.4454	24.6629	0.276	0.320569	1.86877	1.71953	2.3407	2.08519	6.03479	5.53656	8.13635	7.0908	15.308	14.7498	22.91	23.619
47.148	0.829956	0.716709	2.68372	2.45065	2.84338	2.40184	6.77112	6.19178	8.83655	7.72732	16.6686	16.7162	23.4796	24.7043	0.288696	0.322497	1.87585	1.72432	2.34412	2.09179	6.06494	5.54968	8.151	7.10962	15.3304	14.7799	22.9581	23.6599
47.248	0.83667	0.718953	2.68457	2.45624	2.85767	2.40894	6.7876	6.20556	8.84521	7.74693	16.7085	16.7469	23.5195	24.7457	0.291748	0.324425	1.88452	1.72911	2.35229	2.09839	6.0769	5.5628	8.1731	7.12845	15.3586	14.81	23.0115	23.7008
47.348	0.848633	0.721198	2.69458	2.46184	2.86963	2.41604	6.79346	6.21933	8.87622	7.76654	16.7339	16.7775	23.5583	24.7871	0.289795	0.326352	1.896	1.7339	2.36426	2.10498	6.09814	5.57592	8.18311	7.14728	15.384	14.8401	23.0527	23.7417
47.448	0.86206	0.723443	2.69629	2.46744	2.87744	2.42314	6.81299	6.2331	8.89795	7.78615	16.7766	16.8082	23.623	24.8284	0.297607	0.32828	1.89258	1.73869	2.37769	2.11158	6.1084	5.58904	8.21606	7.1661	15.4231	14.8702	23.0996	23.7826
47.548	0.872314	0.725686	2.70239	2.47303	2.88916	2.43024	6.83057	6.24687	8.91577	7.80576	16.8218	16.8389	23.666	24.8698	0.297607	0.330206	1.89819	1.74347	2.39355	2.11817	6.12561	5.60215	8.22827	7.18492	15.4543	14.9003	23.1426	23.8235
47.648	0.869995	0.72793	2.7135	2.47863	2.8988	2.43734	6.84216	6.26064	8.93665	7.82537	16.8646	16.8696	23.7125	24.9111	0.309204	0.332133	1.90979	1.74826	2.39734	2.12477	6.1355	5.61527	8.24548	7.20373	15.4855	14.9304	23.1932	23.8644
47.748	0.883545	0.730173	2.71973	2.48422	2.90674	2.44444	6.86743	6.2744	8.97021	7.84497	16.8921	16.9002	23.7637	24.9525	0.309326	0.334058	1.92334	1.75305	2.41089	2.13136	6.15198	5.62838	8.25757	7.22255	15.5247	14.9605	23.2458	23.9052
47.848	0.884643	0.732416	2.73059	2.48981	2.91541	2.45153	6.87659	6.28817	8.98669	7.86457	16.9147	16.9309	23.8058	24.9938	0.304321	0.335984	1.92273	1.75783	2.41809	2.13795	6.16382	5.64149	8.27185	7.24136	15.5668	14.9906	23.296	23.9461
47.948	0.898437	0.734658	2.73413	2.49541	2.91748	2.45863	6.89209	6.30193	9.00415	7.88417	16.9536	16.9615	23.8582	25.0352	0.318115	0.33791	1.93042	1.76262	2.42944	2.14453	6.16492	5.6546	8.29541	7.26016	15.5996	15.0207	23.3428	23.9869
48.048	0.891723	0.7369	2.74133	2.501	2.93591	2.46572	6.90857	6.31569	9.01746	7.90376	16.9938	16.9922	23.9083	25.0765	0.317016	0.339834	1.92541	1.7674	2.42859	2.15112	6.17847	5.6677	8.30432	7.27897	15.6381	15.0507	23.3829	24.0278
48.148	0.893554	0.739142	2.74316	2.50659	2.93017	2.47281	6.9165	6.32945	9.03833	7.92336	17.0073	17.0228	23.9375	25.1178	0.311278	0.341759	1.92773	1.77219	2.43652	2.15771	6.17932	5.68081	8.31982	7.29777	15.6594	15.0808	23.4294	24.0686
48.248	0.884645	0.741383	2.74817	2.51218	2.93909	2.4799	6.92151	6.34321	9.05335	7.94294	17.0414	17.0535	23.9659	25.1591	0.302369	0.343683	1.92078	1.77697	2.43933	2.16429	6.19031	5.69391	8.32483	7.31657	15.6915	15.1109	23.4757	24.1094
48.348	0.893677	0.743624	2.74524	2.51777	2.93787	2.487	6.93811	6.35697	9.06604	7.96253	17.0797	17.0841	24.0099	25.2004	0.313354	0.345607	1.92566	1.78175	2.4425	2.17087	6.21045	5.70701	8.34143	7.33536	15.7335	15.1409	23.5079	24.1503
48.448	0.888671	0.745865	2.75195	2.52336	2.94873	2.49408	6.95044	6.37072	9.08813	7.98212	17.1177	17.1148	24.0557	25.2417	0.315917	0.347531	1.92456	1.78653	2.45483	2.17746	6.22668	5.72011	8.35596	7.35416	15.7659	15.171	23.5632	24.1911
48.548	0.88684	0.748105	2.75793	2.52895	2.95276	2.50117	6.97229	6.38448	9.10608	8.0017	17.153	17.1454	24.1083	25.2829	0.317992	0.349454	1.9342	1.79132	2.46301	2.18404	6.22705	5.73321	8.3717	7.37295	15.8068	15.201	23.6105	24.2319
48.648	0.887695	0.750345	2.75879	2.53454	2.95557	2.50826	6.98096	6.39823	9.12427	8.02128	17.1868	17.176	24.1543	25.3242	0.32495	0.351377	1.93555	1.7961	2.46387	2.19062	6.23316	5.74631	8.38599	7.39174	15.8333	15.2311	23.6677	24.2727
48.748	0.887696	0.752585	2.76245	2.54013	2.95557	2.51534	6.98096	6.41198	9.13037	8.04086	17.2161	17.2067	24.1855	25.3655	0.322755	0.353299	1.92334	1.80088	2.46948	2.1972	6.25635	5.7594	8.40186	7.41052	15.8645	15.2611	23.7012	24.3134
48.848	0.893554	0.754824	2.77441	2.54572	2.96143	2.52243	6.99243	6.42573	9.15576	8.06043	17.2476	17.2373	24.2341	25.4067	0.338378	0.355221	1.93896	1.80566	2.48145	2.20377	6.27319	5.7725	8.41943	7.4293	15.9053	15.2912	23.7615	24.3542
48.948	0.886719	0.757063	2.7793	2.5513	2.97192	2.52951	7.0188	6.43948	9.16846	8.08001	17.2837	17.2679	24.2959	25.448	0.337646	0.357143	1.94995	1.81043	2.48022	2.21035	6.29834	5.78559	8.43408	7.44808	15.9358	15.3212	23.8115	24.395
49.048	0.900146	0.759301	2.77539	2.55689	2.98389	2.53659	7.04053	6.45322	9.1936	8.09958	17.3228	17.2985	24.3428	25.4892	0.343261	0.359064	1.94604	1.81521	2.49219	2.21692	6.30567	5.79868	8.46142	7.46686	15.9709	15.3513	23.8623	24.4357
49.148	0.894043	0.761539	2.77661	2.56248	2.98511	2.54367	7.04175	6.46697	9.21851	8.11915	17.3435	17.3291	24.3752	25.5304	0.333252	0.360986	1.94311	1.81999	2.49707	2.2235	6.31995	5.81177	8.47437	7.48563	16.0034	15.3813	23.9026	24.4765
49.248	0.900025	0.763777	2.78308	2.56806	2.99719	2.55075	7.05994	6.48071	9.22498	8.13871	17.3812	17.3597	24.4264	25.5717	0.339234	0.362906	1.95569	1.82476	2.50964	2.23007	6.34631	5.82485	8.48865	7.50441	16.035	15.4113	23.942	24.5172
49.348	0.907104	0.766014	2.79407	2.57365	3.00671	2.55783	7.07678	6.49445	9.25915	8.15827	17.4176	17.3903	24.4843	25.6129	0.346557	0.364827	1.96472	1.82954	2.52063	2.23664	6.35144	5.83794	8.5094	7.52317	16.0734	15.4413	24.0001	24.558
49.448	0.906372	0.768251	2.79504	2.57923	3.0072	2.56491	7.07776	6.50819	9.2699	8.17784	17.4381	17.4209	24.5421	25.6541	0.335815	0.366747	1.97498	1.83432	2.52161	2.24321	6.3667	5.85102	8.5238	7.54194	16.1117	15.4713	24.0341	24.5987
49.548	0.904296	0.770488	2.79907	2.58481	3.02295	2.57198	7.09912	6.52193	9.29736	8.19739	17.479	17.4515	24.5908	25.6953	0.345459	0.368666	1.99683	1.83909	2.5271	2.24978	6.38232	5.8641	8.54932	7.5607	16.1582	15.5014	24.0908	24.6394
49.648	0.908203	0.772724	2.79883	2.5904	3.02319	2.57906	7.10864	6.53567	9.3208	8.21695	17.5024	17.4821	24.6338	25.7365	0.329834	0.370585	1.98901	1.84386	2.53711	2.25634	6.39722	5.87718	8.57056	7.57946	16.1858	15.5314	24.1221	24.6801
49.748	0.899415	0.77496	2.79004	2.59598	3.02564	2.58613	7.12939	6.54941	9.32373	8.2365	17.5269	17.5127	24.6875	25.7777	0.336426	0.372504	1.99194	1.84864	2.53638	2.26291	6.41382	5.89026	8.5874	7.59822	16.2161	15.5614	24.1563	24.7208
49.848	0.904297	0.777195	2.79492	2.60156	3.02295	2.5932	7.14209	6.56314	9.35376	8.25605	17.563	17.5433	24.7119	25.8188	0.347412	0.374423	2.00244	1.85341	2.54077	2.26947	6.42358	5.90333	8.604	7.61697	16.25	15.5914	24.2039	24.7615
49.948	0.919677	0.779431	2.80249	2.60714	3.03271	2.60028	7.15186	6.57687	9.36963	8.2756	17.5923	17.5739	24.7664	25.86	0.351074	0.376341	2.01416	1.85818	2.5603	2.27604	6.42285	5.91641	8.6272	7.63572	16.2854	15.6214	24.2588	24.8022
50.048	0.917236	0.781665	2.80225	2.61272	3.0376	2.60735	7.16284	6.59061	9.38843	8.29514	17.6284	17.6044	24.8225	25.9012	0.356445	0.378259	2.01953	1.86295	2.54834	2.2826	6.44287	5.92948	8.63867	7.65447	16.3042	15.6514	24.2913	24.8429
50.148	0.912109	0.7839	2.80835	2.6183	3.03686	2.61441	7.18286	6.60434	9.4104	8.31469	17.6643	17.635	24.8799	25.9423	0.360839	0.380177	2.02612	1.86772	2.55444	2.28916	6.45374	5.94255	8.64697	7.67322	16.3381	15.6814	24.3291	24.8835
50.248	0.913209	0.786133	2.81555	2.62388	3.03381	2.62148	7.18445	6.61807	9.42542	8.33423	17.7064	17.6656	24.9122	25.9835	0.354371	0.382094	2.03088	1.87249	2.56165	2.29572	6.48413	5.95562	8.66541	7.69196	16.3761	15.7113	24.3693	24.9242
50.348	0.917968	0.788367	2.83374	2.62946	3.04639	2.62855	7.20825	6.63179	9.44604	8.35376	17.7446	17.6961	24.9639	26.0246	0.35913	0.384011	2.03784	1.87726	2.57422	2.30227	6.48132	5.96869	8.70361	7.7107	16.4124	15.7413	24.4187	24.9648
50.448	0.915161	0.790601	2.8407	2.63504	3.04358	2.63561	7.22302	6.64552	9.45056	8.3733	17.7692	17.7267	24.9923	26.0657	0.361938	0.385927	2.04065	1.88203	2.57141	2.30883	6.48889	5.98175	8.70081	7.72943	16.4291	15.7713	24.4591	25.0055
50.548	0.919067	0.792833	2.85437	2.64062	3.04749	2.64268	7.24475	6.65924	9.47034	8.39283	17.8043	17.7572	25.0409	26.1068	0.369995	0.387843	2.04871	1.88679	2.58093	2.31539	6.50269	5.99482	8.72205	7.74817	16.4662	15.8013	24.5077	25.0461
50.648	0.915039	0.795066	2.87183	2.64619	3.05518	2.64974	7.25806	6.67296	9.49536	8.41236	17.8315	17.7878	25.0938	26.148	0.365967	0.389759	2.06201	1.89156	2.59058	2.32194	6.52991	6.00788	8.75342	7.7669	16.4934	15.8312	24.5527	25.0867
50.748	0.92688	0.797298	2.8822	2.65177	3.07068	2.6568	7.27991	6.68668	9.51917	8.43189	17.8763	17.8183	25.1349	26.1891	0.38147	0.391674	2.07019	1.89633	2.60657	2.32849	6.53686	6.02094	8.76331	7.78563	16.5228	15.8612	24.6053	25.1274
50.848	0.927734	0.79953	2.87085	2.65734	3.07764	2.66386	7.29248	6.7004	9.53174	8.45142	17.9028	17.8489	25.1785	26.2302	0.388427	0.393589	2.07104	1.90109	2.5957	2.33505	6.55139	6.034	8.77197	7.80435	16.5488	15.8911	24.6379	25.168
50.948	0.928833	0.801762	2.88977	2.66292	3.08435	2.67092	7.29553	6.71412	9.54065	8.47094	17.9291	17.8794	25.2247	26.2712	0.374145	0.395504	2.05676	1.90586	2.60046	2.3416	6.55835	6.04706	8.78479	7.82308	16.5775	15.9211	24.6698	25.2086
51.048	0.923828	0.803993	2.88647	2.66849	3.08765	2.67798	7.31567	6.72784	9.55518	8.49046	17.9692	17.91	25.2839	26.3123	0.368652	0.397418	2.05908	1.91062	2.60937	2.34815	6.57886	6.06011	8.79736	7.8418	16.6077	15.951	24.7178	25.2492
51.148	0.928954	0.806223	2.90137	2.67407	3.09228	2.68504	7.33276	6.74155	9.57373	8.50998	17.9939	17.9405	25.3286	26.3534	0.377929	0.399332	2.06836	1.91539	2.61084	2.35469	6.58472	6.07317	8.83154	7.86051	16.6497	15.981	24.7676	25.2897
51.248	0.922608	0.808454	2.90723	2.67964	3.09619	2.69209	7.33252	6.75527	9.59912	8.52949	18.0249	17.971	25.3591	26.3945	0.365968	0.401246	2.06812	1.92015	2.61011	2.36124	6.60596	6.08622	8.84326	7.87923	16.6787	16.0109	24.8125	25.3303
51.348	0.93457	0.810684	2.91504	2.68521	3.104	2.69914	7.35767	6.76898	9.61865	8.54901	18.0579	18.0016	25.4121	26.4355	0.371582	0.403159	2.07373	1.92491	2.61597	2.36779	6.61792	6.09927	8.85107	7.89794	16.7122	16.0409	24.8516	25.3709
51.448	0.940429	0.812914	2.9209	2.69079	3.11182	2.7062	7.36768	6.78269	9.63623	8.56852	18.0874	18.0321	25.4609	26.4766	0.383545	0.405072	2.08569	1.92967	2.62231	2.37433	6.62378	6.11232	8.86499	7.91665	16.7493	16.0708	24.9119	25.4114
51.548	0.951904	0.815143	2.91894	2.69636	3.11768	2.71325	7.38696	6.7964	9.6499	8.58802	18.1245	18.0626	25.4941	26.5176	0.3833	0.406985	2.09155	1.93443	2.62402	2.38087	6.6394	6.12536	8.87817	7.93535	16.7783	16.1007	24.9629	25.452
51.648	0.954101	0.817372	2.92651	2.70193	3.11597	2.7203	7.40869	6.8101	9.66553	8.60753	18.1577	18.0931	25.5371	26.5586	0.391357	0.408897	2.08374	1.93919	2.62573	2.38741	6.64539	6.13841	8.89795	7.95405	16.8079	16.1306	25.0059	25.4925
51.748	0.960083	0.8196	2.9386	2.7075	3.12146	2.72735	7.41467	6.82381	9.67932	8.62703	18.1949	18.1236	25.5743	26.5996	0.389527	0.410809	2.09534	1.94395	2.63586	2.39395	6.66186	6.15146	8.91736	7.97276	16.839	16.1606	25.0509	25.533
51.848	0.968749	0.821828	2.95288	2.71307	3.13623	2.7344	7.43115	6.83751	9.69971	8.64653	18.2231	18.1541	25.6338	26.6407	0.398193	0.41272	2.10815	1.94871	2.64453	2.40049	6.67468	6.1645	8.94385	7.99145	16.8733	16.1905	25.0964	25.5736
51.948	0.958129	0.824056	2.96374	2.71864	3.13733	2.74145	7.44397	6.85122	9.70862	8.66603	18.2555	18.1846	25.674	26.6817	0.393188	0.414632	2.09753	1.95347	2.65125	2.40703	6.67847	6.17754	8.94861	8.01015	16.8939	16.2204	25.1371	25.6141
52.048	0.961914	0.826284	2.97363	2.72421	3.14111	2.74849	7.46118	6.86492	9.72412	8.68552	18.2788	18.2151	25.7146	26.7227	0.395263	0.416542	2.10327	1.95822	2.66113	2.41357	6.69202	6.19057	8.97803	8.02884	16.9248	16.2503	25.1716	25.6546
52.148	0.975463	0.828511	2.98157	2.72977	3.14905	2.75554	7.48499	6.87862	9.74182	8.70502	18.3236	18.2456	25.7677	26.7637	0.403197	0.418453	2.10339	1.96298	2.65735	2.4201	6.69617	6.20361	9.0033	8.04753	16.9584	16.2802	25.2365	25.6951
52.248	0.983277	0.830737	2.97962	2.73534	3.1471	2.76258	7.48303	6.89232	9.75159	8.72451	18.351	18.2761	25.8026	26.8046	0.395143	0.420363	2.1051	1.96774	2.6554	2.42664	6.70581	6.21665	9.01526	8.06621	16.9816	16.3101	25.2736	25.7356
52.348	0.973877	0.832964	2.98706	2.74091	3.15088	2.76962	7.5022	6.90601	9.76514	8.74399	18.3806	18.3066	25.8594	26.8456	0.401123	0.422273	2.10742	1.97249	2.66284	2.43317	6.71167	6.22968	9.03442	8.08489	17.0127	16.34	25.3103	25.7761
52.448	0.967773	0.83519	2.99902	2.74647	3.15674	2.77666	7.51416	6.91971	9.77881	8.76348	18.4055	18.3371	25.9043	26.8866	0.406982	0.424182	2.10107	1.97725	2.67847	2.4397	6.72546	6.24271	9.05786	8.10357	17.0442	16.3699	25.3613	25.8165
52.548	0.975463	0.837415	2.98938	2.75204	3.15881	2.7837	7.52405	6.9334	9.78699	8.78296	18.4449	18.3675	25.9337	26.9275	0.402954	0.426091	2.10925	1.982	2.68103	2.44623	6.72913	6.25574	9.0758	8.12225	17.0658	16.3998	25.4081	25.857
52.648	0.979614	0.839641	2.99304	2.7576	3.16248	2.79074	7.53943	6.94709	9.79431	8.80244	18.4681	18.398	25.9938	26.9685	0.404907	0.428	2.11291	1.98675	2.6842	2.45276	6.75439	6.26877	9.08728	8.14092	17.0848	16.4296	25.4686	25.8974
52.748	0.987061	0.841866	3.00659	2.76317	3.17041	2.79778	7.55298	6.96079	9.81396	8.82192	18.4956	18.4285	26.0391	27.0094	0.412842	0.429908	2.12085	1.9915	2.69043	2.45929	6.76367	6.2818	9.11255	8.1596	17.1262	16.4595	25.5156	25.9379
52.848	0.990234	0.84409	3.01953	2.76873	3.18481	2.80482	7.57568	6.97447	9.83057	8.84139	18.5356	18.4589	26.0869	27.0504	0.404296	0.431816	2.13159	1.99626	2.69922	2.46581	6.77502	6.29482	9.13916	8.17826	17.1663	16.4894	25.5557	25.9783
52.948	0.986449	0.846315	3.01575	2.77429	3.18933	2.81185	7.57971	6.98816	9.85193	8.86087	18.5709	18.4894	26.1185	27.0913	0.396362	0.433724	2.12781	2.00101	2.70325	2.47234	6.77454	6.30784	9.151	8.19693	17.1898	16.5192	25.6044	26.0188
53.048	0.985473	0.848538	3.01477	2.77986	3.18225	2.81889	7.59045	7.00185	9.86877	8.88034	18.5992	18.5199	26.1505	27.1322	0.401001	0.435631	2.12683	2.00576	2.69055	2.47886	6.78796	6.32086	9.15369	8.21559	17.2103	16.5491	25.6466	26.0592
53.148	0.979614	0.850762	3.02063	2.78542	3.18811	2.82592	7.60413	7.01553	9.88245	8.8998	18.6168	18.5503	26.1913	27.1731	0.395629	0.437538	2.12659	2.01051	2.69641	2.48538	6.80042	6.33388	9.18518	8.23425	17.2357	16.579	25.701	26.0996
53.248	0.982301	0.852985	3.02161	2.79098	3.18909	2.83295	7.61487	7.02922	9.901	8.91927	18.6586	18.5808	26.2299	27.214	0.394166	0.439444	2.1261	2.01525	2.70105	2.49191	6.80737	6.3469	9.18982	8.25291	17.2697	16.6088	25.7509	26.14
53.348	0.991211	0.855207	3.0127	2.79654	3.19189	2.83998	7.61768	7.0429	9.90015	8.93873	18.687	18.6112	26.2676	27.2549	0.403076	0.441351	2.1228	2.02	2.70996	2.49843	6.82104	6.35992	9.21411	8.27156	17.2903	16.6387	25.7891	26.1804
53.448	1.00122	0.85743	3.02637	2.8021	3.20557	2.84701	7.64307	7.05658	9.92505	8.95819	18.7202	18.6416	26.3181	27.2958	0.408935	0.443257	2.13647	2.02475	2.71582	2.50494	6.823	6.37293	9.24536	8.29021	17.3291	16.6685	25.8418	26.2208
53.548	0.987304	0.859652	3.03198	2.80766	3.21118	2.85404	7.65088	7.07026	9.93701	8.97765	18.7515	18.6721	26.3633	27.3367	0.400878	0.445162	2.13281	2.0295	2.71582	2.51146	6.83777	6.38594	9.25146	8.30886	17.3547	16.6984	25.8787	26.2612
53.648	0.990356	0.861873	3.02771	2.81322	3.22253	2.86106	7.65393	7.08393	9.95178	8.9971	18.7797	18.7025	26.4054	27.3775	0.410034	0.447067	2.13538	2.03424	2.71887	2.51798	6.84058	6.39896	9.26624	8.32751	17.3773	16.7282	25.9132	26.3015
53.748	0.987061	0.864094	3.03003	2.81878	3.21924	2.86809	7.67041	7.09761	9.96802	9.01655	18.8198	18.7329	26.4512	27.4184	0.410645	0.448972	2.14429	2.03899	2.72168	2.52449	6.85901	6.41197	9.27686	8.34615	17.4033	16.758	25.9473	26.3419
53.848	0.998169	0.866315	3.0448	2.82434	3.22424	2.87511	7.68323	7.11128	9.99084	9.036	18.8561	18.7634	26.4952	27.4593	0.408081	0.450876	2.14929	2.04373	2.7323	2.53101	6.88452	6.42497	9.29358	8.36479	17.434	16.7879	26.005	26.3822
53.948	1.00415	0.868536	3.06055	2.82989	3.2395	2.88214	7.70825	7.12496	10.0122	9.05545	18.8889	18.7938	26.5361	27.5001	0.417724	0.452781	2.15894	2.04848	2.74609	2.53752	6.88953	6.43798	9.31494	8.38343	17.4609	16.8177	26.0476	26.4226
54.048	1.00085	0.870756	3.06555	2.83545	3.245	2.88916	7.71375	7.13863	10.0287	9.07489	18.9274	18.8242	26.5802	27.5409	0.428345	0.454684	2.15247	2.05322	2.7511	2.54403	6.90381	6.45098	9.32971	8.40206	17.486	16.8475	26.0997	26.4629
54.148	1.00195	0.872976	3.0625	2.841	3.25317	2.89618	7.72607	7.1523	10.063	9.09434	18.9651	18.8546	26.6335	27.5818	0.425781	0.456588	2.16284	2.05796	2.75366	2.55054	6.92932	6.46398	9.33838	8.42069	17.5137	16.8773	26.1553	26.5032
54.248	1.00964	0.875195	3.07581	2.84656	3.26697	2.9032	7.7511	7.16596	10.0824	9.11378	18.9984	18.885	26.6749	27.6226	0.425171	0.458491	2.16272	2.0627	2.76746	2.55705	6.93542	6.47699	9.36926	8.43932	17.547	16.9071	26.1998	26.5436
54.348	1.0177	0.877414	3.0824	2.85211	3.27869	2.91022	7.76135	7.17963	10.0963	9.13321	19.0319	18.9154	26.714	27.6634	0.437377	0.460393	2.16882	2.06745	2.77356	2.56356	6.95166	6.48998	9.38147	8.45794	17.5844	16.9369	26.2511	26.5839
54.448	1.01074	0.879633	3.08667	2.85767	3.28393	2.91724	7.77393	7.19329	10.1147	9.15265	19.0623	18.9458	26.75	27.7042	0.430419	0.462296	2.16186	2.07219	2.77832	2.57006	6.95776	6.50298	9.40356	8.47657	17.6006	16.9667	26.2871	26.6242
54.548	1.0144	0.881851	3.09644	2.86322	3.28345	2.92425	7.7876	7.20696	10.1226	9.17208	19.0813	18.9762	26.7891	27.745	0.43042	0.464198	2.17554	2.07693	2.78394	2.57657	6.9812	6.51598	9.40771	8.49519	17.6301	16.9965	26.3262	26.6645
54.648	1.0188	0.88407	3.10864	2.86878	3.29565	2.93127	7.79932	7.22062	10.146	9.19151	19.1187	19.0066	26.8398	27.7858	0.434326	0.466099	2.19287	2.08167	2.80176	2.58307	6.98804	6.52897	9.43896	8.5138	17.6614	17.0263	26.3691	26.7047
54.748	1.02148	0.886287	3.11133	2.87433	3.31372	2.93828	7.81787	7.23428	10.1646	9.21093	19.1567	19.037	26.8857	27.8265	0.441162	0.468001	2.20386	2.0864	2.80249	2.58957	6.99951	6.54196	9.44775	8.53242	17.6877	17.0561	26.4072	26.745
54.848	1.03296	0.888504	3.10547	2.87988	3.31396	2.94529	7.83154	7.24794	10.1726	9.23036	19.1821	19.0674	26.9229	27.8673	0.440917	0.469902	2.198	2.09114	2.81812	2.59607	7.01343	6.55495	9.46143	8.55103	17.7131	17.0859	26.446	26.7853
54.948	1.02173	0.890721	3.10547	2.88543	3.31958	2.9523	7.84326	7.2616	10.1802	9.24978	19.2017	19.0978	26.9619	27.9081	0.447021	0.471802	2.20361	2.09588	2.82227	2.60257	7.02319	6.56794	9.47681	8.56964	17.7327	17.1157	26.4814	26.8255
55.048	1.03101	0.892938	3.11157	2.89098	3.34155	2.95931	7.86084	7.27525	10.2034	9.2692	19.231	19.1281	27.0146	27.9488	0.456787	0.473702	2.21753	2.10061	2.83203	2.60907	7.04187	6.58093	9.49268	8.58824	17.7676	17.1454	26.5303	26.8658
55.148	1.03625	0.895154	3.11023	2.89653	3.33069	2.96632	7.8678	7.28891	10.2262	9.28862	19.2748	19.1585	27.0626	27.9896	0.455932	0.475602	2.21277	2.10535	2.82751	2.61557	7.03882	6.59391	9.51697	8.60684	17.8002	17.1752	26.5741	26.906
55.248	1.02149	0.897369	3.11548	2.90208	3.32764	2.97333	7.88208	7.30256	10.2427	9.30803	19.2974	19.1889	27.0869	28.0303	0.446778	0.477502	2.20606	2.11009	2.82397	2.62206	7.05823	6.6069	9.52588	8.62544	17.8167	17.205	26.6162	26.9462
55.348	1.03308	0.899585	3.12659	2.90763	3.33923	2.98034	7.89978	7.31621	10.2679	9.32744	19.3285	19.2193	27.1493	28.071	0.464477	0.479401	2.20935	2.11482	2.84167	2.62856	7.06128	6.61988	9.54919	8.64404	17.8595	17.2347	26.6591	26.9865
55.448	1.0227	0.9018	3.1167	2.91318	3.33667	2.98734	7.90503	7.32986	10.2732	9.34685	19.3491	19.2496	27.178	28.1118	0.461913	0.4813	2.21289	2.11955	2.84473	2.63505	7.08081	6.63286	9.56006	8.66263	17.8728	17.2645	26.7073	27.0267
55.548	1.02441	0.904015	3.12207	2.91872	3.34033	2.99434	7.91846	7.34351	10.2944	9.36626	19.3882	19.28	27.2305	28.1525	0.455566	0.483198	2.21094	2.12429	2.85058	2.64154	7.08472	6.64583	9.57959	8.68122	17.8936	17.2943	26.7363	27.0669
55.648	1.01294	0.906229	3.11816	2.92427	3.34424	3.00135	7.93018	7.35715	10.2983	9.38566	19.4172	19.3103	27.2617	28.1932	0.459961	0.485096	2.20264	2.12902	2.85815	2.64803	7.1051	6.65881	9.59692	8.69981	17.9348	17.324	26.7832	27.1071
55.748	1.01941	0.908443	3.13074	2.92982	3.349	3.00835	7.94275	7.3708	10.3304	9.40506	19.4672	19.3407	27.3173	28.2339	0.460571	0.486994	2.2157	2.13375	2.87683	2.65452	7.12659	6.67179	9.62537	8.71839	17.9725	17.3538	26.8287	27.1473
55.848	1.02356	0.910657	3.1405	2.93536	3.36096	3.01535	7.95496	7.38444	10.3519	9.42446	19.4908	19.371	27.3605	28.2745	0.464721	0.488891	2.20593	2.13848	2.86926	2.66101	7.13916	6.68476	9.62952	8.73698	18.0004	17.3835	26.8702	27.1874
55.948	1.01465	0.91287	3.15527	2.94091	3.36377	3.02235	7.95728	7.39808	10.3687	9.44386	19.5168	19.4014	27.4023	28.3152	0.459472	0.490789	2.21435	2.14321	2.87207	2.6675	7.14746	6.69773	9.65747	8.75556	18.0227	17.4132	26.9043	27.2276
56.048	1.0188	0.915083	3.15942	2.94645	3.36792	3.02935	7.97925	7.41172	10.3845	9.46325	19.5466	19.4317	27.4419	28.3559	0.461913	0.492685	2.22461	2.14794	2.87036	2.67398	7.15686	6.7107	9.66211	8.77413	18.0464	17.443	26.9475	27.2678
56.148	1.02209	0.917295	3.15906	2.952	3.3656	3.03634	7.98474	7.42536	10.3939	9.48264	19.5812	19.462	27.4821	28.3966	0.449829	0.494582	2.21423	2.15267	2.86804	2.68047	7.17664	6.72367	9.67102	8.7927	18.0712	17.4727	26.9843	27.3079
56.248	1.02478	0.919507	3.16907	2.95754	3.38123	3.04334	8.00647	7.439	10.4174	9.50203	19.6205	19.4924	27.5255	28.4372	0.465454	0.496477	2.23401	2.1574	2.87805	2.68695	7.18335	6.73663	9.69495	8.81127	18.1068	17.5024	27.0292	27.3481
56.348	1.02734	0.921719	3.17944	2.96308	3.39404	3.05033	8.021	7.45264	10.4478	9.52141	19.6528	19.5227	27.5793	28.4779	0.476318	0.498373	2.24683	2.16212	2.89038	2.69343	7.19983	6.7496	9.71338	8.82984	18.1233	17.5321	27.0693	27.3882
56.448	1.01306	0.923931	3.18665	2.96862	3.39514	3.05733	8.03381	7.46627	10.4606	9.5408	19.6852	19.553	27.6251	28.5185	0.469604	0.500269	2.24573	2.16685	2.89563	2.69991	7.21655	6.76256	9.71448	8.84841	18.1556	17.5618	27.1036	27.4283
56.548	1.01538	0.926141	3.19507	2.97417	3.39795	3.06432	8.03662	7.4799	10.4712	9.56018	19.7153	19.5833	27.667	28.5591	0.472412	0.502163	2.24292	2.17158	2.89844	2.70639	7.22815	6.77552	9.73682	8.86697	18.178	17.5916	27.1433	27.4684
56.648	1.01965	0.928352	3.21082	2.97971	3.40955	3.07131	8.06775	7.49353	10.4945	9.57956	19.7504	19.6136	27.7177	28.5997	0.47229	0.504058	2.25452	2.1763	2.90027	2.71287	7.24377	6.78848	9.74841	8.88553	18.2208	17.6213	27.1981	27.5085
56.748	1.01941	0.930562	3.22278	2.98525	3.42151	3.0783	8.07971	7.50716	10.5162	9.59893	19.7855	19.6439	27.7609	28.6403	0.47644	0.505952	2.27014	2.18103	2.91785	2.71935	7.26343	6.80144	9.77014	8.90408	18.2523	17.651	27.2491	27.5486
56.848	1.02734	0.932772	3.22656	2.99079	3.42334	3.08529	8.09326	7.52079	10.5354	9.6183	19.8208	19.6742	27.8154	28.6809	0.478271	0.507846	2.27808	2.18575	2.92383	2.72582	7.28076	6.81439	9.78369	8.92263	18.2737	17.6807	27.2864	27.5887
56.948	1.03125	0.934982	3.23047	2.99633	3.42725	3.09227	8.1106	7.53442	10.5552	9.63768	19.8616	19.7045	27.8584	28.7215	0.487793	0.50974	2.27979	2.19047	2.9314	2.7323	7.30249	6.82735	9.79126	8.94118	18.2971	17.7103	27.3406	27.6288
57.048	1.03906	0.937191	3.24609	3.00186	3.43701	3.09926	8.13843	7.54804	10.5786	9.65704	19.9028	19.7348	27.9167	28.7621	0.507079	0.511633	2.29956	2.1952	2.95312	2.73877	7.31983	6.8403	9.82471	8.95973	18.3379	17.74	27.3916	27.6689
57.148	1.03296	0.9394	3.24609	3.0074	3.43701	3.10624	8.13428	7.56167	10.5903	9.67641	19.9341	19.7651	27.9658	28.8027	0.517334	0.513526	2.29346	2.19992	2.95874	2.74524	7.33472	6.85325	9.83252	8.97827	18.3752	17.7697	27.4307	27.7089
57.248	1.04419	0.941608	3.25122	3.01294	3.44775	3.11323	8.15283	7.57529	10.6089	9.69577	19.9644	19.7954	28.0039	28.8433	0.516357	0.515418	2.3103	2.20464	2.97925	2.75171	7.33765	6.8662	9.85498	8.99682	18.4229	17.7994	27.4746	27.749
57.348	1.03882	0.943817	3.25	3.01848	3.45068	3.12021	8.15576	7.58891	10.6292	9.71513	19.9924	19.8257	28.0576	28.8838	0.524902	0.51731	2.31323	2.20936	2.98267	2.75818	7.35498	6.87914	9.87134	9.01535	18.4495	17.8291	27.5283	27.789
57.448	1.04688	0.946025	3.25952	3.02401	3.45459	3.12719	8.17139	7.60253	10.6414	9.73449	20.02	19.856	28.0984	28.9244	0.530762	0.519202	2.32275	2.21408	2.98608	2.76465	7.3728	6.89209	9.88745	9.03389	18.4766	17.8587	27.5657	27.8291
57.548	1.04687	0.948232	3.26758	3.02955	3.46631	3.13417	8.1831	7.61615	10.6606	9.75384	20.0513	19.8863	28.1589	28.9649	0.548583	0.521094	2.33862	2.2188	3.0039	2.77112	7.38452	6.90503	9.90649	9.05242	18.5139	17.8884	27.6045	27.8691
57.648	1.04321	0.950439	3.27539	3.03508	3.46631	3.14115	8.19287	7.62976	10.678	9.7732	20.0728	19.9165	28.2041	29.0055	0.54248	0.522985	2.34424	2.22352	3.00391	2.77758	7.38843	6.91797	9.92432	9.07095	18.5354	17.9181	27.6436	27.9091
57.748	1.04663	0.952645	3.28491	3.04062	3.47583	3.14813	8.21411	7.64338	10.6938	9.79254	20.1001	19.9468	28.2471	29.046	0.550538	0.524875	2.35986	2.22823	3.00366	2.78404	7.41174	6.93091	9.93604	9.08948	18.5588	17.9477	27.6865	27.9491
57.848	1.05627	0.954852	3.30261	3.04615	3.49353	3.1551	8.22986	7.65699	10.725	9.81189	20.139	19.9771	28.2936	29.0865	0.554321	0.526766	2.36389	2.23295	3.02136	2.79051	7.42871	6.94385	9.96301	9.108	18.6053	17.9774	27.7428	27.9891
57.948	1.07153	0.957058	3.31177	3.05168	3.50268	3.16208	8.24683	7.6706	10.7341	9.83124	20.1677	20.0073	28.3596	29.127	0.55371	0.528656	2.37671	2.23767	3.03247	2.79697	7.43494	6.95679	9.97827	9.12652	18.6401	18.007	27.7991	28.0291
58.048	1.06433	0.959263	3.31238	3.05721	3.5033	3.16905	8.26477	7.68421	10.7521	9.85058	20.1996	20.0376	28.3993	29.1675	0.554322	0.530545	2.38342	2.24238	3.03308	2.80343	7.46741	6.96972	9.99622	9.14504	18.6603	18.0367	27.827	28.0691
58.148	1.07898	0.961469	3.32703	3.06275	3.51794	3.17602	8.28357	7.69782	10.7887	9.86992	20.2338	20.0678	28.453	29.208	0.561157	0.532435	2.39026	2.2471	3.04773	2.80989	7.48523	6.98266	10.0248	9.16355	18.7062	18.0663	27.8785	28.1091
58.248	1.08899	0.963673	3.33704	3.06828	3.52795	3.183	8.3053	7.71142	10.806	9.88925	20.2633	20.0981	28.4962	29.2485	0.571167	0.534324	2.40027	2.25181	3.05774	2.81635	7.48804	6.99559	10.0521	9.18207	18.7413	18.0959	27.9337	28.1491
58.348	1.08008	0.965878	3.34546	3.07381	3.53076	3.18997	8.32153	7.72503	10.8247	9.90859	20.2993	20.1283	28.5303	29.289	0.562256	0.536212	2.40869	2.25653	3.04883	2.8228	7.51123	7.00852	10.0669	9.20057	18.7698	18.1256	27.9812	28.189
58.448	1.08008	0.968082	3.35742	3.07934	3.53662	3.19694	8.34521	7.73863	10.8501	9.92792	20.3303	20.1585	28.5752	29.3294	0.568114	0.538101	2.42432	2.26124	3.05469	2.82926	7.51257	7.02144	10.0845	9.21908	18.8125	18.1552	28.0305	28.229
58.548	1.07727	0.970286	3.35095	3.08487	3.53577	3.2039	8.35022	7.75224	10.859	9.94725	20.3629	20.1888	28.6115	29.3699	0.557495	0.539988	2.422	2.26595	3.05188	2.83571	7.526	7.03437	10.0895	9.23758	18.8334	18.1848	28.049	28.2689
58.648	1.0907	0.972489	3.37561	3.0904	3.54919	3.21087	8.36365	7.76583	10.8802	9.96658	20.3959	20.219	28.6757	29.4103	0.559204	0.541876	2.41956	2.27066	3.07092	2.84216	7.53394	7.04729	10.1146	9.25608	18.87	18.2144	28.1132	28.3088
58.748	1.09863	0.974692	3.3877	3.09592	3.56079	3.21783	8.37964	7.77943	10.8999	9.9859	20.4314	20.2492	28.7205	29.4508	0.567139	0.543763	2.41968	2.27537	3.08862	2.84861	7.54285	7.06022	10.1399	9.27458	18.9036	18.244	28.158	28.3487
58.848	1.08801	0.976895	3.38879	3.10145	3.56799	3.2248	8.38806	7.79303	10.9088	10.0052	20.4515	20.2795	28.7667	29.4912	0.562134	0.54565	2.42078	2.28008	3.09021	2.85506	7.55249	7.07314	10.1549	9.29307	18.9298	18.2737	28.1962	28.3886
58.948	1.0957	0.979097	3.39648	3.10698	3.57568	3.23176	8.41162	7.80663	10.9338	10.0245	20.4907	20.3097	28.8135	29.5316	0.575927	0.547537	2.42847	2.28479	3.08594	2.86151	7.57007	7.08606	10.1743	9.31157	18.9749	18.3033	28.2529	28.4286
59.048	1.09375	0.981299	3.40234	3.11251	3.57593	3.23872	8.41748	7.82022	10.9536	10.0439	20.5161	20.3399	28.8506	29.572	0.579589	0.549423	2.42261	2.2895	3.09741	2.86796	7.57495	7.09897	10.1824	9.33006	19.0002	18.3329	28.2825	28.4684
59.148	1.08887	0.983501	3.40356	3.11803	3.57666	3.24568	8.43213	7.83381	10.9702	10.0632	20.5542	20.3701	28.8945	29.6125	0.58496	0.551309	2.42163	2.29421	3.10645	2.87441	7.59338	7.11189	10.1948	9.34854	19.0283	18.3624	28.3298	28.5083
59.248	1.08997	0.985702	3.40051	3.12356	3.57776	3.25264	8.43323	7.8474	10.983	10.0825	20.5865	20.4003	28.9347	29.6528	0.568238	0.553194	2.42273	2.29892	3.10754	2.88085	7.61206	7.1248	10.2037	9.36702	19.0551	18.392	28.3624	28.5482
59.348	1.08887	0.987903	3.40723	3.12908	3.58447	3.2596	8.45166	7.86099	11.0032	10.1018	20.6165	20.4305	28.9885	29.6932	0.580566	0.555079	2.42944	2.30362	3.09888	2.88729	7.61975	7.13771	10.2222	9.3855	19.0986	18.4216	28.4121	28.5881
59.448	1.09656	0.990103	3.4093	3.13461	3.59412	3.26656	8.47107	7.87458	11.0345	10.1211	20.6615	20.4607	29.0292	29.7336	0.586547	0.556964	2.43103	2.30833	3.10608	2.89374	7.62402	7.15062	10.2377	9.40398	19.132	18.4512	28.4608	28.6279
59.548	1.08716	0.992303	3.40747	3.14013	3.59644	3.27351	8.4812	7.88817	11.0369	10.1404	20.6833	20.4909	29.0781	29.774	0.58081	0.558848	2.4375	2.31303	3.11816	2.90018	7.64221	7.16353	10.2517	9.42245	19.1655	18.4808	28.4985	28.6678
59.648	1.08997	0.994503	3.42566	3.14565	3.6029	3.28047	8.48767	7.90175	11.057	10.1597	20.7172	20.5211	29.1298	29.8144	0.593383	0.560732	2.44397	2.31774	3.13074	2.90662	7.65393	7.17644	10.2719	9.44092	19.1915	18.5104	28.5184	28.7076
59.748	1.07239	0.996702	3.41419	3.15117	3.60315	3.28742	8.50745	7.91534	11.0651	10.179	20.7408	20.5513	29.171	29.8547	0.593629	0.562616	2.44202	2.32244	3.13098	2.91306	7.67261	7.18934	10.2799	9.45939	19.2113	18.5399	28.5614	28.7474
59.848	1.08496	0.998901	3.43848	3.1567	3.61572	3.29437	8.52197	7.92892	11.0837	10.1983	20.7729	20.5815	29.2205	29.8951	0.6062	0.564499	2.46069	2.32715	3.14355	2.91949	7.67261	7.20225	10.3042	9.47785	19.2471	18.5695	28.623	28.7873
59.948	1.07715	1.0011	3.42676	3.16222	3.61572	3.30133	8.53003	7.9425	11.0991	10.2176	20.7981	20.6116	29.26	29.9354	0.604004	0.566382	2.46069	2.33185	3.13184	2.92593	7.69971	7.21515	10.3083	9.49632	19.2844	18.599	28.6504	28.8271
60.048	1.08887	1.0033	3.45019	3.16774	3.62744	3.30827	8.54126	7.95608	11.1282	10.2369	20.8298	20.6418	29.3164	29.9757	0.610107	0.568265	2.46069	2.33655	3.14917	2.93236	7.71436	7.22805	10.3257	9.51478	19.3157	18.6286	28.7051	28.8669
60.148	1.09375	1.0055	3.44141	3.17326	3.63037	3.31522	8.55615	7.96965	11.1431	10.2562	20.8481	20.672	29.3701	30.016	0.613037	0.570147	2.46362	2.34125	3.1582	2.9388	7.73804	7.24094	10.3364	9.53323	19.3499	18.6581	28.7527	28.9067
60.248	1.0918	1.00769	3.46484	3.17877	3.64014	3.32217	8.57764	7.98323	11.1646	10.2754	20.897	20.7021	29.4189	30.0564	0.611084	0.572029	2.46167	2.34595	3.16797	2.94523	7.74561	7.25384	10.3635	9.55168	19.3889	18.6877	28.8076	28.9465
60.348	1.0957	1.00989	3.46875	3.18429	3.646	3.32912	8.58154	7.9968	11.1899	10.2947	20.9204	20.7323	29.4619	30.0967	0.61499	0.573911	2.46558	2.35065	3.16406	2.95166	7.76929	7.26673	10.3813	9.57013	19.418	18.7172	28.8506	28.9862
60.448	1.09375	1.01209	3.46899	3.18981	3.65185	3.33606	8.59912	8.01038	11.1958	10.314	20.9575	20.7625	29.499	30.137	0.613037	0.575792	2.46362	2.35535	3.17358	2.95809	7.77795	7.27963	10.3989	9.58858	19.4592	18.7468	28.8914	29.026
60.548	1.07947	1.01428	3.4679	3.19533	3.65491	3.343	8.6156	8.02395	11.2184	10.3333	20.9801	20.7926	29.5411	30.1772	0.609985	0.577673	2.47229	2.36005	3.18274	2.96452	7.79651	7.29252	10.402	9.60703	19.4818	18.7763	28.9396	29.0658
60.648	1.08191	1.01648	3.47449	3.20085	3.65784	3.34995	8.6283	8.03752	11.2423	10.3526	21.0026	20.8228	29.5887	30.2175	0.617065	0.579553	2.48499	2.36475	3.18567	2.97094	7.80542	7.30541	10.4203	9.62547	19.5135	18.8058	29.0026	29.1055
60.748	1.09082	1.01868	3.4834	3.20636	3.66064	3.35689	8.64893	8.05109	11.2595	10.3718	21.0386	20.8529	29.6406	30.2578	0.612061	0.581433	2.48218	2.36944	3.19409	2.97737	7.82666	7.31829	10.437	9.64391	19.5579	18.8353	29.0371	29.1452
60.848	1.09473	1.02087	3.4873	3.21188	3.66455	3.36383	8.66064	8.06465	11.269	10.3911	21.062	20.883	29.6719	30.298	0.609863	0.583313	2.48608	2.37414	3.19238	2.98379	7.83606	7.33118	10.4604	9.66234	19.5813	18.8649	29.0723	29.185
60.948	1.10364	1.02307	3.49622	3.21739	3.67346	3.37077	8.66956	8.07822	11.2894	10.4104	21.1058	20.9132	29.7162	30.3383	0.624878	0.585193	2.49499	2.37884	3.20129	2.99022	7.84119	7.34406	10.4811	9.68077	19.6117	18.8944	29.1202	29.2247
61.048	1.10144	1.02526	3.50378	3.22291	3.67908	3.3777	8.68689	8.09178	11.3129	10.4296	21.1371	20.9433	29.7643	30.3785	0.622681	0.587072	2.49646	2.38353	3.20691	2.99664	7.8689	7.35694	10.5001	9.6992	19.6486	18.9239	29.1649	29.2644
61.148	1.11694	1.02746	3.51001	3.22842	3.69092	3.38464	8.69678	8.10534	11.3442	10.4489	21.186	20.9734	29.802	30.4188	0.632568	0.588951	2.51245	2.38822	3.20898	3.00306	7.87476	7.36983	10.5278	9.71763	19.678	18.9534	29.2061	29.3041
61.248	1.12329	1.02965	3.50977	3.23393	3.69678	3.39158	8.71045	8.1189	11.3579	10.4681	21.2114	21.0036	29.8447	30.459	0.626709	0.590829	2.52026	2.39292	3.21484	3.00948	7.89209	7.3827	10.5454	9.73605	19.7034	18.9829	29.2371	29.3438
61.348	1.11133	1.03184	3.51367	3.23945	3.70068	3.39851	8.72607	8.13246	11.3772	10.4874	21.2466	21.0337	29.8933	30.4992	0.622802	0.592707	2.51245	2.39761	3.21875	3.0159	7.90405	7.39558	10.5515	9.75447	19.7305	19.0124	29.2842	29.3835
61.448	1.11719	1.03404	3.51953	3.24496	3.70654	3.40544	8.73975	8.14602	11.4087	10.5067	21.272	21.0638	29.9443	30.5394	0.628662	0.594585	2.51831	2.4023	3.22461	3.02231	7.92432	7.40846	10.5686	9.77289	19.762	19.0419	29.3213	29.4232
61.548	1.11035	1.03623	3.52441	3.25047	3.71143	3.41237	8.7583	8.15957	11.4216	10.5259	21.3137	21.0939	29.9749	30.5796	0.635497	0.596462	2.52319	2.40699	3.23144	3.02873	7.93152	7.42133	10.5818	9.7913	19.8037	19.0714	29.3477	29.4628
61.648	1.10364	1.03842	3.52551	3.25598	3.71252	3.4193	8.7594	8.17313	11.4418	10.5452	21.3405	21.124	30.0262	30.6198	0.624877	0.598339	2.52429	2.41168	3.23254	3.03514	7.94678	7.4342	10.5905	9.80971	19.8304	19.1008	29.3739	29.5025
61.748	1.09375	1.04061	3.52734	3.26149	3.71436	3.42623	8.76123	8.18668	11.4478	10.5644	21.3735	21.1541	30.0615	30.66	0.62671	0.600216	2.52393	2.41637	3.23804	3.04155	7.95581	7.44707	10.6057	9.82812	19.8635	19.1303	29.4307	29.5421
61.848	1.10059	1.0428	3.53223	3.267	3.72705	3.43316	8.77783	8.20023	11.4722	10.5836	21.3979	21.1842	30.1172	30.7002	0.619873	0.602092	2.53491	2.42106	3.2373	3.04797	7.97522	7.45994	10.6228	9.84653	19.8879	19.1598	29.4551	29.5818
61.948	1.10046	1.045	3.53992	3.27251	3.73474	3.44009	8.79333	8.21378	11.4818	10.6029	21.4252	21.2143	30.1561	30.7403	0.614136	0.603968	2.53088	2.42575	3.25061	3.05438	7.98413	7.4728	10.6378	9.86493	19.9152	19.1892	29.494	29.6214
62.048	1.10742	1.04719	3.54883	3.27802	3.74365	3.44701	8.80029	8.22733	11.5083	10.6221	21.4595	21.2444	30.1985	30.7805	0.616944	0.605844	2.53784	2.43044	3.26172	3.06079	8.00146	7.48567	10.657	9.88333	19.9534	19.2187	29.5359	29.661
62.148	1.10742	1.04938	3.56055	3.28352	3.75537	3.45394	8.82373	8.24087	11.5261	10.6414	21.5024	21.2745	30.2354	30.8206	0.622558	0.607719	2.55518	2.43513	3.27344	3.06719	8.01733	7.49853	10.6763	9.90173	19.9729	19.2482	29.5811	29.7006
62.248	1.10571	1.05157	3.55273	3.28903	3.75928	3.46086	8.83325	8.25442	11.5337	10.6606	21.5259	21.3046	30.2783	30.8608	0.622803	0.609594	2.56323	2.43981	3.2793	3.0736	8.03674	7.51139	10.688	9.92012	20.0081	19.2776	29.6182	29.7402
62.348	1.10925	1.05376	3.57214	3.29454	3.77869	3.46778	8.84924	8.26796	11.5587	10.6798	21.5551	21.3346	30.3214	30.9009	0.630493	0.611469	2.57092	2.4445	3.28699	3.08	8.04272	7.52425	10.7074	9.93851	20.0372	19.3071	29.6454	29.7798
62.448	1.10742	1.05595	3.57812	3.30004	3.78467	3.4747	8.85474	8.2815	11.5767	10.6991	21.5923	21.3647	30.3623	30.941	0.630371	0.613343	2.56519	2.44918	3.28516	3.08641	8.05225	7.53711	10.7212	9.9569	20.0605	19.3365	29.6904	29.8194
62.548	1.11328	1.05814	3.5686	3.30555	3.79053	3.48162	8.8728	8.29504	11.5942	10.7183	21.6294	21.3948	30.3994	30.9811	0.642334	0.615217	2.57104	2.45387	3.29102	3.09281	8.07202	7.54996	10.7388	9.97529	20.0901	19.366	29.7317	29.859
62.648	1.11914	1.06033	3.56836	3.31105	3.79639	3.48854	8.88232	8.30858	11.6135	10.7375	21.6626	21.4248	30.4387	31.0212	0.64038	0.61709	2.57471	2.45855	3.29688	3.09921	8.08862	7.56282	10.7446	9.99367	20.1233	19.3954	29.7627	29.8985
62.748	1.11597	1.06251	3.57129	3.31656	3.79932	3.49546	8.88525	8.32212	11.6287	10.7567	21.6968	21.4549	30.4688	31.0613	0.631592	0.618963	2.5874	2.46323	3.2937	3.10561	8.09448	7.57567	10.7554	10.012	20.146	19.4248	29.8047	29.9381
62.848	1.12012	1.0647	3.57715	3.32206	3.80518	3.50237	8.90283	8.33565	11.6499	10.7759	21.7222	21.485	30.5137	31.1014	0.643066	0.620836	2.58765	2.46792	3.30566	3.11201	8.11096	7.58852	10.7749	10.0304	20.1536	19.4543	29.8669	29.9776
62.948	1.12488	1.06689	3.57825	3.32756	3.80823	3.50929	8.91174	8.34919	11.651	10.7951	21.7545	21.515	30.546	31.1415	0.636841	0.622709	2.59436	2.4726	3.31238	3.11841	8.13159	7.60137	10.7838	10.0488	20.1896	19.4837	29.9054	30.0172
63.048	1.12036	1.06908	3.5813	3.33307	3.81494	3.5162	8.93018	8.36272	11.6716	10.8144	21.7944	21.5451	30.5918	31.1815	0.643066	0.624581	2.59741	2.47728	3.31543	3.1248	8.14026	7.61421	10.8059	10.0672	20.2219	19.5131	29.9512	30.0567
63.148	1.12488	1.07126	3.58948	3.33857	3.82361	3.52311	8.9408	8.37625	11.6915	10.8336	21.819	21.5751	30.6317	31.2216	0.646118	0.626453	2.60608	2.48196	3.3241	3.1312	8.14795	7.62706	10.8346	10.0855	20.2638	19.5425	30.0026	30.0962
63.248	1.11523	1.07345	3.59766	3.34407	3.82568	3.53002	8.9624	8.38978	11.7075	10.8528	21.8423	21.6051	30.6707	31.2616	0.648194	0.628324	2.59839	2.48664	3.32617	3.13759	8.17151	7.6399	10.8325	10.1039	20.2854	19.5719	30.0615	30.1357
63.348	1.11316	1.07564	3.59973	3.34957	3.82581	3.53693	8.96814	8.4033	11.725	10.872	21.8793	21.6352	30.7098	31.3017	0.642212	0.630195	2.60413	2.49132	3.32019	3.14398	8.18127	7.65274	10.8556	10.1223	20.3107	19.6013	30.1027	30.1752
63.448	1.11926	1.07782	3.60535	3.35507	3.82776	3.54384	8.9823	8.41683	11.7311	10.8912	21.9166	21.6652	30.755	31.3417	0.646118	0.632066	2.60242	2.496	3.32629	3.15038	8.20288	7.66558	10.8793	10.1406	20.3419	19.6307	30.1456	30.2147
63.548	1.11523	1.08001	3.61719	3.36057	3.83545	3.55075	8.98388	8.43036	11.7639	10.9104	21.9517	21.6952	30.8057	31.3817	0.654296	0.633936	2.61572	2.50067	3.33398	3.15677	8.20288	7.67842	10.9048	10.159	20.3733	19.6601	30.2039	30.2542
63.648	1.11304	1.08219	3.61719	3.36607	3.83545	3.55766	8.9917	8.44388	11.7761	10.9296	21.9829	21.7253	30.833	31.4218	0.653808	0.635806	2.61377	2.50535	3.3396	3.16315	8.21143	7.69126	10.9048	10.1773	20.3928	19.6895	30.2607	30.2937
63.748	1.12402	1.08438	3.61597	3.37156	3.84229	3.56456	9.0022	8.4574	11.7883	10.9488	22.019	21.7553	30.8691	31.4618	0.653077	0.637676	2.62476	2.51003	3.34497	3.16954	8.23621	7.70409	10.9211	10.1957	20.415	19.7189	30.3103	30.3331
63.848	1.11926	1.08656	3.62903	3.37706	3.84924	3.57146	9.02136	8.47092	11.8131	10.968	22.0455	21.7853	30.9208	31.5018	0.652221	0.639545	2.6239	2.5147	3.35144	3.17593	8.23901	7.71692	10.9459	10.214	20.4476	19.7483	30.3583	30.3726
63.948	1.12012	1.08875	3.62988	3.38256	3.8501	3.57837	9.02173	8.48444	11.8218	10.9871	22.0776	21.8153	30.959	31.5417	0.653076	0.641414	2.6167	2.51938	3.3584	3.18231	8.25452	7.72976	10.9468	10.2324	20.4854	19.7776	30.416	30.412
64.048	1.12781	1.09093	3.62976	3.38805	3.84607	3.58527	9.03772	8.49795	11.8412	11.0063	22.1068	21.8453	30.9979	31.5817	0.649048	0.643283	2.63049	2.52405	3.35071	3.1887	8.27795	7.74258	10.9662	10.2507	20.5131	19.807	30.4606	30.4515
64.148	1.13733	1.09311	3.64148	3.39355	3.85779	3.59217	9.04529	8.51147	11.8724	11.0255	22.1459	21.8753	31.0487	31.6217	0.660766	0.645151	2.63049	2.52872	3.36194	3.19508	8.28394	7.75541	10.9913	10.269	20.5438	19.8364	30.5155	30.4909
64.248	1.14941	1.0953	3.65112	3.39904	3.87183	3.59906	9.06299	8.52498	11.8958	11.0447	22.1753	21.9053	31.0859	31.6616	0.664551	0.647019	2.64014	2.5334	3.36841	3.20146	8.29675	7.76824	11.0151	10.2874	20.5852	19.8657	30.5605	30.5303
64.348	1.13879	1.09748	3.65832	3.40454	3.87244	3.60596	9.06409	8.53849	11.903	11.0639	22.2037	21.9353	31.1205	31.7016	0.654419	0.648886	2.63953	2.53807	3.36902	3.20784	8.31018	7.78106	11.024	10.3057	20.6058	19.8951	30.5948	30.5697
64.448	1.14441	1.09966	3.66589	3.41003	3.8822	3.61286	9.08923	8.552	11.9164	11.083	22.2289	21.9653	31.1493	31.7415	0.659546	0.650754	2.6471	2.54274	3.37512	3.21421	8.32483	7.79388	11.0414	10.324	20.6366	19.9245	30.6256	30.6091
64.548	1.15906	1.10184	3.66882	3.41552	3.89685	3.61975	9.10388	8.56551	11.9506	11.1022	22.2748	21.9953	31.2069	31.7815	0.680298	0.65262	2.66736	2.54741	3.38147	3.22059	8.34546	7.8067	11.0616	10.3424	20.6713	19.9538	30.6835	30.6485
64.648	1.16797	1.10403	3.6814	3.42102	3.90771	3.62665	9.12451	8.57902	11.9712	11.1214	22.3149	22.0252	31.2375	31.8214	0.67749	0.654487	2.68042	2.55208	3.39648	3.22697	8.35815	7.81952	11.0825	10.3607	20.6992	19.9832	30.7236	30.6879
64.748	1.16504	1.10621	3.69238	3.42651	3.9126	3.63354	9.13721	8.59252	11.9839	11.1406	22.3357	22.0552	31.2813	31.8613	0.674561	0.656353	2.6853	2.55675	3.40137	3.23334	8.37061	7.83234	11.0991	10.379	20.7297	20.0125	30.7598	30.7273
64.848	1.17187	1.10839	3.69922	3.432	3.91943	3.64043	9.146	8.60603	12.0024	11.1597	22.3638	22.0852	31.321	31.9012	0.681396	0.658219	2.68603	2.56142	3.4082	3.23971	8.3905	7.84515	11.1116	10.3973	20.7561	20.0418	30.7939	30.7666
64.948	1.18518	1.11057	3.70691	3.43749	3.92712	3.64732	9.16541	8.61953	12.0199	11.1789	22.3949	22.1152	31.38	31.9411	0.68103	0.660085	2.69788	2.56609	3.41589	3.24609	8.39526	7.85796	11.1332	10.4156	20.7833	20.0712	30.8292	30.806
65.048	1.20019	1.11275	3.70801	3.44298	3.92798	3.65421	9.1687	8.63303	12.0405	11.198	22.4368	22.1451	31.4238	31.981	0.688232	0.661949	2.69897	2.57075	3.41308	3.25246	8.41077	7.87077	11.1538	10.4339	20.8118	20.1005	30.8767	30.8453
65.148	1.20227	1.11493	3.7157	3.44847	3.93616	3.6611	9.1781	8.64653	12.0621	11.2172	22.4645	22.1751	31.4689	32.0209	0.690307	0.663814	2.70666	2.57542	3.4115	3.25883	8.42749	7.88358	11.1676	10.4522	20.8317	20.1298	30.9161	30.8846
65.248	1.19141	1.11711	3.72266	3.45396	3.93701	3.66798	9.19678	8.66003	12.0747	11.2363	22.4929	22.205	31.5125	32.0607	0.691163	0.665679	2.71362	2.58008	3.41187	3.26519	8.4364	7.89639	11.1819	10.4705	20.8557	20.1591	30.9561	30.924
65.348	1.20032	1.11929	3.71985	3.45945	3.94592	3.67487	9.20203	8.67352	12.0914	11.2555	22.5326	22.235	31.5665	32.1006	0.690307	0.667543	2.72253	2.58475	3.42688	3.27156	8.44775	7.9092	11.1949	10.4888	20.8898	20.1884	30.9962	30.9633
65.448	1.19019	1.12146	3.71777	3.46494	3.94946	3.68176	9.21094	8.68702	12.1047	11.2746	22.5542	22.2649	31.5994	32.1405	0.691894	0.669407	2.7124	2.58941	3.42847	3.27793	8.46667	7.922	11.2083	10.5071	20.9209	20.2177	31.0251	31.0026
65.548	1.18957	1.12364	3.71887	3.47042	3.95666	3.68864	9.23035	8.70051	12.1315	11.2938	22.5804	22.2949	31.6573	32.1803	0.691284	0.67127	2.7196	2.59408	3.43005	3.28429	8.47314	7.9348	11.2252	10.5254	20.9476	20.247	31.0636	31.0419
65.648	1.19238	1.12582	3.72168	3.47591	3.95947	3.69552	9.24438	8.714	12.1421	11.3129	22.6033	22.3248	31.6992	32.2201	0.687988	0.673133	2.7146	2.59874	3.42871	3.29065	8.49207	7.94761	11.2397	10.5437	20.97	20.2763	31.0859	31.0811
65.748	1.18738	1.128	3.73401	3.48139	3.96619	3.7024	9.2572	8.72749	12.1605	11.3321	22.6407	22.3547	31.745	32.26	0.698853	0.674995	2.72693	2.6034	3.43176	3.29701	8.50269	7.9604	11.2501	10.562	21.004	20.3056	31.1317	31.1204
65.848	1.19629	1.13018	3.74707	3.48688	3.97314	3.70928	9.27197	8.74098	12.1812	11.3512	22.6677	22.3847	31.7852	32.2998	0.697998	0.676858	2.74365	2.60806	3.43823	3.30337	8.50391	7.9732	11.2747	10.5803	21.0344	20.3349	31.1641	31.1597
65.948	1.20117	1.13235	3.75195	3.49236	3.97803	3.71616	9.27686	8.75447	12.1938	11.3703	22.6997	22.4146	31.8291	32.3396	0.693115	0.67872	2.74292	2.61272	3.45288	3.30973	8.52002	7.986	11.2974	10.5986	21.0608	20.3642	31.2136	31.1989
66.048	1.20044	1.13453	3.75122	3.49785	3.98291	3.72303	9.29346	8.76795	12.2126	11.3895	22.7319	22.4445	31.873	32.3794	0.697998	0.680581	2.7478	2.61738	3.45825	3.31609	8.5293	7.99879	11.3101	10.6169	21.0852	20.3935	31.2617	31.2382
66.148	1.19727	1.13671	3.75952	3.50333	3.9895	3.72991	9.31006	8.78143	12.229	11.4086	22.7603	22.4744	31.9209	32.4192	0.710449	0.682443	2.74878	2.62204	3.46289	3.32245	8.53943	8.01158	11.3306	10.6351	21.1079	20.4228	31.3096	31.2774
66.248	1.20007	1.13888	3.76282	3.50881	4.00623	3.73678	9.32092	8.79492	12.2513	11.4277	22.7943	22.5043	31.955	32.459	0.702027	0.684303	2.75159	2.6267	3.45789	3.3288	8.55347	8.02437	11.339	10.6534	21.1261	20.452	31.3436	31.3166
66.348	1.19629	1.14106	3.77026	3.5143	4.00635	3.74366	9.33618	8.8084	12.2654	11.4469	22.8162	22.5343	31.9941	32.4987	0.709472	0.686164	2.76514	2.63136	3.46582	3.33515	8.57214	8.03716	11.3647	10.6717	21.1536	20.4813	31.3828	31.3559
66.448	1.20325	1.14323	3.78332	3.51978	4.01331	3.75053	9.35901	8.82188	12.276	11.466	22.8502	22.5642	32.0402	32.5385	0.722534	0.688024	2.76648	2.63602	3.47278	3.34151	8.57581	8.04994	11.3795	10.6899	21.1801	20.5105	31.4288	31.3951
66.548	1.20691	1.14541	3.78699	3.52526	4.01697	3.7574	9.36267	8.83535	12.3048	11.4851	22.8734	22.5941	32.0848	32.5782	0.718384	0.689884	2.77014	2.64067	3.47644	3.34786	8.59741	8.06273	11.3868	10.7082	21.2089	20.5398	31.4716	31.4343
66.648	1.21484	1.14758	3.80078	3.53074	4.03076	3.76427	9.38623	8.84883	12.3308	11.5042	22.9185	22.6239	32.1494	32.618	0.720458	0.691744	2.77222	2.64533	3.49023	3.35421	8.59741	8.07551	11.4263	10.7265	21.2581	20.5691	31.5186	31.4735
66.748	1.21484	1.14975	3.80274	3.53622	4.03076	3.77114	9.39795	8.8623	12.3499	11.5233	22.9399	22.6538	32.175	32.6577	0.726075	0.693603	2.76441	2.64998	3.47852	3.36056	8.61047	8.08829	11.4282	10.7447	21.2776	20.5983	31.5576	31.5126
66.848	1.20813	1.15193	3.80774	3.5417	4.03577	3.778	9.41467	8.87577	12.3688	11.5424	22.9723	22.6837	32.2303	32.6974	0.737182	0.695462	2.76941	2.65464	3.48352	3.3669	8.61682	8.10107	11.4449	10.763	21.3041	20.6275	31.6017	31.5518
66.948	1.21277	1.1541	3.81238	3.54718	4.04236	3.78487	9.42346	8.88925	12.3969	11.5615	23.0118	22.7136	32.2802	32.7372	0.734009	0.69732	2.77771	2.65929	3.48816	3.37325	8.62939	8.11385	11.4611	10.7812	21.34	20.6568	31.6315	31.591
67.048	1.22168	1.15627	3.81348	3.55265	4.05908	3.79173	9.42627	8.90272	12.4136	11.5806	23.0581	22.7435	32.3127	32.7769	0.74292	0.699178	2.78101	2.66395	3.49902	3.3796	8.65137	8.12662	11.4878	10.7995	21.3684	20.686	31.6838	31.6301
67.148	1.22778	1.15845	3.83105	3.55813	4.06885	3.7986	9.44775	8.91618	12.4314	11.5998	23.0955	22.7734	32.3477	32.8166	0.740966	0.701036	2.78711	2.6686	3.5144	3.38594	8.64722	8.1394	11.5093	10.8177	21.4094	20.7152	31.7205	31.6693
67.248	1.22168	1.16062	3.82324	3.56361	4.06104	3.80546	9.45557	8.92965	12.4331	11.6188	23.1167	22.8032	32.3867	32.8563	0.740968	0.702893	2.78296	2.67325	3.51074	3.39228	8.67065	8.15217	11.5171	10.836	21.429	20.7445	31.7695	31.7084
67.348	1.23144	1.16279	3.83301	3.56908	4.073	3.81232	9.47705	8.94311	12.4546	11.6379	23.146	22.8331	32.4451	32.8959	0.742919	0.70475	2.79834	2.6779	3.51489	3.39862	8.68152	8.16494	11.5386	10.8542	21.4546	20.7737	31.8123	31.7475
67.448	1.22278	1.16496	3.8324	3.57456	4.0719	3.81918	9.48206	8.95658	12.4772	11.657	23.1803	22.863	32.4816	32.9356	0.734252	0.706607	2.79773	2.68255	3.51379	3.40496	8.68127	8.17771	11.5551	10.8725	21.4767	20.8029	31.8507	31.7866
67.548	1.22253	1.16713	3.83166	3.58003	4.07727	3.82604	9.50134	8.97004	12.4847	11.6761	23.1996	22.8928	32.5182	32.9753	0.739624	0.708463	2.79749	2.6872	3.51916	3.4113	8.70093	8.19047	11.5726	10.8907	21.5001	20.8321	31.8839	31.8257
67.648	1.22681	1.1693	3.8457	3.58551	4.08569	3.8329	9.521	8.9835	12.5063	11.6952	23.229	22.9227	32.5657	33.0149	0.745849	0.71032	2.81103	2.69185	3.52148	3.41764	8.70483	8.20324	11.5884	10.9089	21.5276	20.8613	31.9268	31.8648
67.748	1.21875	1.17147	3.84961	3.59098	4.0835	3.83975	9.53271	8.99696	12.5298	11.7143	23.2524	22.9525	32.6003	33.0546	0.749756	0.712175	2.82471	2.6965	3.52539	3.42397	8.72144	8.216	11.604	10.9272	21.5569	20.8905	31.9619	31.9039
67.848	1.22754	1.17364	3.8584	3.59646	4.09228	3.84661	9.5415	9.01041	12.5503	11.7334	23.2925	22.9823	32.6487	33.0942	0.746826	0.714031	2.82788	2.70114	3.53418	3.43031	8.73706	8.22876	11.6072	10.9454	21.5852	20.9197	32.0098	31.943
67.948	1.23145	1.17581	3.85864	3.60193	4.10181	3.85346	9.55713	9.02387	12.5737	11.7525	23.3333	23.0122	32.6777	33.1338	0.739014	0.715886	2.83179	2.70579	3.53809	3.43664	8.74768	8.24152	11.6147	10.9636	21.6086	20.9489	32.0449	31.982
68.048	1.24011	1.17798	3.84949	3.6074	4.11658	3.86031	9.57361	9.03732	12.5846	11.7716	23.3619	23.042	32.7255	33.1734	0.74768	0.71774	2.83264	2.71044	3.54675	3.44297	8.75562	8.25428	11.6351	10.9818	21.6368	20.9781	32.0848	32.0211
68.148	1.23633	1.18015	3.85742	3.61287	4.12085	3.86716	9.58154	9.05077	12.6001	11.7906	23.395	23.0719	32.7646	33.213	0.74414	0.719594	2.84619	2.71508	3.55469	3.4493	8.76343	8.26704	11.6663	11	21.6643	21.0073	32.1453	32.0601
68.248	1.23633	1.18232	3.85742	3.61834	4.11475	3.87401	9.59326	9.06422	12.6196	11.8097	23.4224	23.1017	32.8037	33.2526	0.743653	0.721448	2.85034	2.71973	3.55469	3.45563	8.78296	8.27979	11.6724	11.0182	21.6895	21.0364	32.1826	32.0992
68.348	1.23633	1.18449	3.86523	3.62381	4.12256	3.88086	9.59741	9.07767	12.6274	11.8288	23.4634	23.1315	32.8643	33.2922	0.74585	0.723302	2.85815	2.72437	3.56812	3.46196	8.79651	8.29254	11.7017	11.0365	21.7229	21.0656	32.218	32.1382
68.448	1.24988	1.18665	3.87512	3.62928	4.13611	3.88771	9.61462	9.09112	12.6605	11.8478	23.4965	23.1613	32.8973	33.3318	0.759399	0.725155	2.86194	2.72902	3.59143	3.46829	8.81592	8.30529	11.7152	11.0547	21.7677	21.0948	32.2567	32.1772
68.548	1.25195	1.18882	3.87305	3.63475	4.13818	3.89455	9.62842	9.10456	12.6743	11.8669	23.5242	23.1911	32.9385	33.3714	0.761475	0.727008	2.86401	2.73366	3.59961	3.47461	8.84045	8.31804	11.7368	11.0729	21.793	21.1239	32.2979	32.2162
68.648	1.26648	1.19099	3.88562	3.64022	4.14709	3.9014	9.6488	9.11801	12.6967	11.886	23.5636	23.2209	32.9786	33.4109	0.766235	0.728861	2.87659	2.7383	3.60046	3.48093	8.84839	8.33079	11.7611	11.0911	21.8312	21.1531	32.3458	32.2552
68.748	1.27441	1.19316	3.89355	3.64568	4.14673	3.90824	9.66846	9.13145	12.7241	11.905	23.5916	23.2507	33.0251	33.4505	0.762451	0.730713	2.8728	2.74294	3.6084	3.48726	8.86389	8.34353	11.7769	11.1093	21.855	21.1822	32.3923	32.2942
68.848	1.27625	1.19532	3.89539	3.65115	4.16248	3.91509	9.68982	9.14489	12.7377	11.9241	23.6205	23.2805	33.0702	33.49	0.764282	0.732564	2.87463	2.74758	3.61584	3.49358	8.87573	8.35628	11.7904	11.1275	21.868	21.2114	32.4296	32.3332
68.948	1.28809	1.19749	3.90161	3.65662	4.17432	3.92193	9.70166	9.15833	12.7458	11.9431	23.6519	23.3103	33.1133	33.5296	0.76831	0.734416	2.88647	2.75222	3.63184	3.4999	8.88745	8.36902	11.814	11.1457	21.9036	21.2405	32.4727	32.3721
69.048	1.28027	1.19965	3.90137	3.66208	4.17822	3.92877	9.71729	9.17177	12.7688	11.9622	23.6753	23.3401	33.1582	33.5691	0.77417	0.736267	2.88257	2.75686	3.63574	3.50622	8.89612	8.38176	11.822	11.1638	21.927	21.2697	32.5002	32.4111
69.148	1.28528	1.20182	3.91565	3.66755	4.18689	3.93561	9.73376	9.1852	12.7897	11.9812	23.7152	23.3699	33.2177	33.6086	0.771118	0.738118	2.89124	2.7615	3.64636	3.51254	8.91406	8.39449	11.8419	11.182	21.9572	21.2988	32.5477	32.45
69.248	1.29102	1.20398	3.92798	3.67301	4.19873	3.94244	9.75732	9.19864	12.8032	12.0003	23.7466	23.3997	33.2686	33.6481	0.782959	0.739968	2.90308	2.76614	3.65039	3.51885	8.91382	8.40723	11.8621	11.2002	22.0002	21.3279	32.5986	32.489
69.348	1.29492	1.20615	3.9314	3.67848	4.19897	3.94928	9.771	9.21207	12.8188	12.0193	23.7781	23.4295	33.3037	33.6876	0.775146	0.741818	2.90894	2.77077	3.6543	3.52517	8.92651	8.41996	11.8618	11.2184	22.0237	21.357	32.6299	32.5279
69.448	1.30176	1.20831	3.94238	3.68394	4.19775	3.95612	9.77588	9.2255	12.8315	12.0384	23.7983	23.4592	33.3477	33.7271	0.772217	0.743668	2.9021	2.77541	3.65918	3.53148	8.93225	8.4327	11.8784	11.2366	22.0403	21.3862	32.6716	32.5668
69.548	1.3075	1.21048	3.94812	3.6894	4.20349	3.96295	9.79333	9.23893	12.849	12.0574	23.8236	23.489	33.3981	33.7666	0.774292	0.745517	2.90222	2.78004	3.66492	3.53779	8.9585	8.44543	11.9037	11.2547	22.0734	21.4153	32.7128	32.6057
69.648	1.30298	1.21264	3.95703	3.69486	4.22046	3.96978	9.81006	9.25236	12.8794	12.0764	23.8557	23.5188	33.4424	33.806	0.777099	0.747367	2.90698	2.78468	3.67944	3.5441	8.97046	8.45816	11.9126	11.2729	22.1018	21.4444	32.749	32.6446
69.748	1.30469	1.2148	3.95923	3.70033	4.22217	3.97661	9.81592	9.26578	12.8853	12.0955	23.8872	23.5485	33.4934	33.8455	0.77124	0.749215	2.91846	2.78931	3.67407	3.55041	8.98108	8.47088	11.9324	11.2911	22.1272	21.4735	32.7998	32.6835
69.848	1.29211	1.21696	3.95593	3.70579	4.22498	3.98344	9.83044	9.27921	12.902	12.1145	23.9059	23.5783	33.5311	33.8849	0.774048	0.751064	2.92322	2.79395	3.67273	3.55672	8.99316	8.48361	11.9427	11.3092	22.1417	21.5026	32.8417	32.7224
69.948	1.29199	1.21913	3.97363	3.71125	4.22534	3.99027	9.84814	9.29263	12.9038	12.1335	23.9175	23.608	33.5818	33.9244	0.772216	0.752912	2.92969	2.79858	3.68433	3.56303	8.98523	8.49633	11.9565	11.3274	22.1672	21.5317	32.8789	32.7613
70.048	1.29382	1.22129	3.9718	3.71671	4.22302	3.9971	9.85413	9.30605	12.9252	12.1526	23.9584	23.6378	33.6327	33.9638	0.776001	0.754759	2.92737	2.80321	3.6825	3.56934	8.99292	8.50905	11.9701	11.3456	22.2059	21.5608	32.9198	32.8001
70.148	1.30566	1.22345	3.97754	3.72217	4.23486	4.00393	9.8772	9.31947	12.9487	12.1716	23.9819	23.6675	33.6877	34.0032	0.787841	0.756606	2.93921	2.80784	3.69434	3.57564	9.00928	8.52177	11.9954	11.3637	22.2434	21.5899	32.9707	32.839
70.248	1.30469	1.22561	3.97095	3.72762	4.23389	4.01075	9.89014	9.33289	12.9556	12.1906	24.0005	23.6973	33.7119	34.0426	0.775147	0.758453	2.93823	2.81247	3.69336	3.58194	9.02039	8.53449	12.0122	11.3819	22.2542	21.6189	32.9973	32.8778
70.348	1.30017	1.22777	3.97375	3.73308	4.24084	4.01758	9.89709	9.34631	12.9742	12.2096	24.0406	23.727	33.7445	34.082	0.782104	0.7603	2.93347	2.8171	3.70032	3.58825	9.03198	8.54721	12.0192	11.4	22.2806	21.648	33.0428	32.9166
70.448	1.30347	1.22993	3.97388	3.73854	4.24463	4.0244	9.9126	9.35972	12.9939	12.2286	24.064	23.7567	33.7832	34.1214	0.778076	0.762146	2.93726	2.82173	3.70972	3.59455	9.0426	8.55992	12.0425	11.4182	22.304	21.6771	33.0898	32.9554
70.548	1.3009	1.23209	3.97644	3.74399	4.2533	4.03122	9.9176	9.37314	13.0138	12.2476	24.1	23.7865	33.8365	34.1608	0.780639	0.763992	2.95154	2.82636	3.72449	3.60085	9.04858	8.57263	12.0475	11.4363	22.3322	21.7062	33.1415	32.9943
70.648	1.29712	1.23425	3.98242	3.74945	4.25928	4.03804	9.93701	9.38655	13.0281	12.2666	24.1335	23.8162	33.8896	34.2002	0.792725	0.765838	2.95386	2.83099	3.73608	3.60714	9.06213	8.58534	12.0725	11.4544	22.3633	21.7352	33.1768	33.0331
70.748	1.30652	1.23641	3.99792	3.75491	4.27478	4.04486	9.95056	9.39996	13.0411	12.2856	24.1779	23.8459	33.9305	34.2395	0.798462	0.767683	2.96741	2.83562	3.75378	3.61344	9.08081	8.59805	12.0865	11.4726	22.4025	21.7643	33.2294	33.0718
70.848	1.31348	1.23857	4.00488	3.76036	4.28979	4.05168	9.96924	9.41337	13.0659	12.3047	24.1931	23.8756	33.9651	34.2789	0.805419	0.769528	2.9646	2.84024	3.74902	3.61974	9.09619	8.61076	12.1125	11.4907	22.4407	21.7933	33.2676	33.1106
70.948	1.30566	1.24073	4.00317	3.76582	4.2876	4.0585	9.98096	9.42678	13.074	12.3237	24.2278	23.9053	34.0039	34.3182	0.797607	0.771372	2.96851	2.84487	3.74927	3.62603	9.11304	8.62347	12.1169	11.5088	22.4641	21.8224	33.3105	33.1494
71.048	1.31641	1.24289	4.01758	3.77127	4.29272	4.06531	9.99365	9.44018	13.0959	12.3426	24.2585	23.935	34.0459	34.3576	0.808349	0.773216	2.98291	2.84949	3.75391	3.63233	9.12085	8.63617	12.1353	11.527	22.4944	21.8514	33.3525	33.1882
71.148	1.32422	1.24505	4.02539	3.77672	4.3042	4.07213	10.0132	9.45358	13.1238	12.3616	24.2854	23.9647	34.0928	34.3969	0.804443	0.77506	2.99683	2.85412	3.76172	3.63862	9.13562	8.64887	12.1472	11.5451	22.5334	21.8805	33.3994	33.2269
71.248	1.3158	1.2472	4.02844	3.78217	4.30359	4.07894	10.024	9.46699	13.1381	12.3806	24.3258	23.9944	34.1271	34.4362	0.807496	0.776903	2.99622	2.85874	3.76111	3.64491	9.14404	8.66157	12.1615	11.5632	22.556	21.9095	33.4398	33.2656
71.348	1.31812	1.24936	4.02759	3.78763	4.30029	4.08575	10.0386	9.48039	13.1548	12.3996	24.3481	24.0241	34.1689	34.4755	0.80249	0.778747	2.99072	2.86337	3.76343	3.6512	9.16101	8.67427	12.1726	11.5813	22.5784	21.9385	33.4695	33.3044
71.448	1.32727	1.25152	4.03577	3.79308	4.30896	4.09256	10.0509	9.49379	13.1752	12.4186	24.3763	24.0538	34.2089	34.5148	0.811157	0.78059	3.00916	2.86799	3.7782	3.65748	9.1665	8.68696	12.1925	11.5994	22.6146	21.9675	33.5155	33.3431
71.548	1.32349	1.25367	4.04785	3.79853	4.31128	4.09937	10.0652	9.50719	13.2007	12.4376	24.4136	24.0835	34.2539	34.5541	0.801758	0.782432	3.00952	2.87261	3.78418	3.66377	9.18445	8.69966	12.2026	11.6176	22.6396	21.9966	33.5625	33.3818
71.648	1.32874	1.25583	4.0592	3.80398	4.32263	4.10618	10.0785	9.52058	13.2142	12.4566	24.4332	24.1132	34.3007	34.5934	0.803345	0.784274	3.01526	2.87723	3.77649	3.67006	9.19287	8.71235	12.2279	11.6357	22.671	22.0256	33.6073	33.4205
71.748	1.33813	1.25799	4.07227	3.80943	4.33154	4.11299	10.0874	9.53398	13.2292	12.4756	24.4575	24.1428	34.3408	34.6327	0.804443	0.786116	3.02417	2.88185	3.78125	3.67634	9.21069	8.72504	12.2505	11.6538	22.6995	22.0546	33.6592	33.4592
71.848	1.32617	1.26014	4.06274	3.81487	4.3374	4.11979	10.0991	9.54737	13.2368	12.4945	24.4927	24.1725	34.3782	34.6719	0.79663	0.787957	3.01636	2.88647	3.78516	3.68262	9.21253	8.73773	12.2622	11.6719	22.7229	22.0836	33.6826	33.4979
71.948	1.32019	1.2623	4.06042	3.82032	4.34705	4.1266	10.1146	9.56076	13.2467	12.5135	24.514	24.2022	34.399	34.7112	0.790649	0.789798	3.01257	2.89109	3.78699	3.6889	9.23523	8.75042	12.264	11.69	22.7616	22.1126	33.704	33.5365
72.048	1.32556	1.26445	4.07141	3.82577	4.35803	4.1334	10.1312	9.57415	13.2633	12.5325	24.5582	24.2318	34.4474	34.7504	0.801635	0.791639	3.01941	2.89571	3.79797	3.69518	9.25256	8.7631	12.2867	11.7081	22.7926	22.1416	33.7462	33.5752
72.148	1.31946	1.26661	4.06946	3.83122	4.36169	4.1402	10.1471	9.58754	13.2748	12.5514	24.5892	24.2615	34.4865	34.7896	0.805298	0.793479	3.01941	2.90033	3.80164	3.70146	9.26721	8.77579	12.2982	11.7262	22.827	22.1706	33.7772	33.6139
72.248	1.32996	1.26876	4.07996	3.83666	4.37634	4.147	10.1635	9.60092	13.3011	12.5704	24.6156	24.2911	34.5226	34.8289	0.808227	0.795319	3.03357	2.90494	3.81824	3.70774	9.28296	8.78847	12.3246	11.7442	22.871	22.1996	33.8251	33.6525
72.348	1.33789	1.27091	4.08789	3.84211	4.38061	4.1538	10.1714	9.61431	13.3169	12.5894	24.6548	24.3208	34.5691	34.8681	0.804687	0.797159	3.03418	2.90956	3.81445	3.71402	9.29248	8.80115	12.3325	11.7623	22.8989	22.2285	33.8721	33.6911
72.448	1.3418	1.27307	4.0918	3.84755	4.38403	4.1606	10.1833	9.62769	13.3345	12.6083	24.6804	24.3504	34.6125	34.9073	0.790771	0.798998	3.0376	2.91417	3.82202	3.72029	9.31335	8.81383	12.356	11.7804	22.9299	22.2575	33.9072	33.7297
72.548	1.33508	1.27522	4.09436	3.853	4.40857	4.1674	10.1937	9.64107	13.351	12.6273	24.7045	24.38	34.652	34.9465	0.799438	0.800837	3.04675	2.91879	3.83679	3.72657	9.32861	8.8265	12.3646	11.7985	22.9464	22.2865	33.9432	33.7684
72.648	1.33691	1.27737	4.1145	3.85844	4.41089	4.17419	10.2017	9.65445	13.3706	12.6462	24.7437	24.4097	34.6973	34.9857	0.809326	0.802675	3.05054	2.9234	3.84473	3.73284	9.34351	8.83918	12.394	11.8166	22.9739	22.3154	33.9824	33.807
72.748	1.34009	1.27952	4.11353	3.86388	4.41553	4.18099	10.2241	9.66783	13.3989	12.6652	24.7874	24.4393	34.7451	35.0248	0.806396	0.804513	3.05933	2.92801	3.85352	3.73911	9.35327	8.85185	12.4028	11.8346	23.0022	22.3444	34.0107	33.8456
72.848	1.33789	1.28168	4.10742	3.86933	4.42725	4.18778	10.2339	9.68121	13.4204	12.6841	24.8171	24.4689	34.7939	35.064	0.808349	0.806351	3.05737	2.93263	3.87134	3.74538	9.36682	8.86452	12.4243	11.8527	23.0315	22.3734	34.0518	33.8841
72.948	1.34534	1.28383	4.10925	3.87477	4.42908	4.19457	10.2435	9.69458	13.4357	12.7031	24.8539	24.4986	34.8348	35.1032	0.810181	0.808189	3.0592	2.93724	3.86707	3.75165	9.37964	8.87719	12.434	11.8708	23.0587	22.4023	34.0905	33.9227
73.048	1.35864	1.28598	4.12207	3.88021	4.44189	4.20137	10.2681	9.70796	13.4607	12.722	24.8882	24.5282	34.8928	35.1423	0.811279	0.810026	3.06421	2.94185	3.87988	3.75791	9.37793	8.88986	12.4585	11.8889	23.0989	22.4313	34.1404	33.9613
73.148	1.35278	1.28813	4.12231	3.88565	4.45361	4.20816	10.2742	9.72133	13.4719	12.741	24.9116	24.5578	34.9316	35.1814	0.815185	0.811863	3.07373	2.94646	3.88574	3.76418	9.38928	8.90252	12.4702	11.9069	23.126	22.4602	34.1699	33.9998
73.248	1.3446	1.29028	4.12952	3.89109	4.4613	4.21494	10.2777	9.7347	13.4918	12.7599	24.9388	24.5874	34.9706	35.2206	0.815064	0.813699	3.08752	2.95107	3.89343	3.77044	9.41284	8.91519	12.4896	11.925	23.171	22.4891	34.2206	34.0384
73.348	1.35278	1.29243	4.14184	3.89653	4.46948	4.22173	10.3069	9.74807	13.5073	12.7788	24.9819	24.617	35.0332	35.2597	0.828857	0.815536	3.08765	2.95568	3.90527	3.77671	9.41834	8.92785	12.5071	11.943	23.2024	22.5181	34.2598	34.0769
73.448	1.34851	1.29458	4.14319	3.90197	4.46521	4.22852	10.3209	9.76144	13.5209	12.7978	25.0033	24.6466	35.0741	35.2988	0.81897	0.817372	3.08948	2.96029	3.9071	3.78297	9.43542	8.94051	12.5267	11.9611	23.2238	22.547	34.2985	34.1154
73.548	1.35388	1.29673	4.15466	3.90741	4.4762	4.2353	10.3336	9.7748	13.5436	12.8167	25.0419	24.6762	35.1163	35.3379	0.833618	0.819207	3.10046	2.9649	3.91809	3.78923	9.45471	8.95316	12.5455	11.9791	23.2599	22.5759	34.3412	34.1539
73.648	1.34753	1.29888	4.15979	3.91284	4.48181	4.24209	10.3392	9.78816	13.557	12.8356	25.0726	24.7058	35.1573	35.377	0.837524	0.821042	3.09827	2.9695	3.92004	3.79549	9.47339	8.96582	12.5511	11.9972	23.3065	22.6048	34.3658	34.1924
73.748	1.35474	1.30103	4.17114	3.91828	4.49268	4.24887	10.3521	9.80153	13.5796	12.8545	25.1108	24.7353	35.1953	35.416	0.848389	0.822877	3.10913	2.97411	3.93042	3.80175	9.47473	8.97848	12.5815	12.0152	23.3296	22.6337	34.4084	34.2309
73.848	1.3634	1.30317	4.17395	3.92372	4.51697	4.25565	10.3707	9.81489	13.5944	12.8735	25.1393	24.7649	35.2413	35.4551	0.843627	0.824711	3.11609	2.97871	3.93787	3.808	9.46851	8.99113	12.6002	12.0333	23.3556	22.6627	34.4386	34.2694
73.948	1.3479	1.30532	4.17188	3.92915	4.521	4.26243	10.3765	9.82825	13.604	12.8924	25.1685	24.7945	35.2844	35.4942	0.841553	0.826545	3.1023	2.98332	3.92969	3.81426	9.49658	9.00378	12.6038	12.0513	23.3792	22.6916	34.4678	34.3078
74.048	1.34839	1.30747	4.18262	3.93459	4.53369	4.26921	10.4045	9.8416	13.6245	12.9113	25.2161	24.8241	35.3357	35.5332	0.846192	0.828379	3.11865	2.98792	3.94605	3.82051	9.50391	9.01643	12.634	12.0693	23.4324	22.7205	34.5176	34.3463
74.148	1.36133	1.30962	4.19141	3.94002	4.54053	4.27599	10.4119	9.85496	13.645	12.9302	25.2485	24.8536	35.3877	35.5723	0.853271	0.830212	3.12573	2.99253	3.9646	3.82677	9.51123	9.02907	12.6587	12.0874	23.469	22.7493	34.5613	34.3848
74.248	1.36133	1.31176	4.19141	3.94545	4.54053	4.28276	10.4077	9.86831	13.6646	12.9491	25.2798	24.8832	35.4329	35.6113	0.853272	0.832045	3.12573	2.99713	3.9707	3.83302	9.52808	9.04172	12.6624	12.1054	23.4885	22.7782	34.6008	34.4232
74.348	1.36841	1.31391	4.19653	3.95089	4.55127	4.28954	10.4319	9.88167	13.679	12.968	25.3179	24.9127	35.4785	35.6503	0.852294	0.833878	3.14014	3.00173	3.98145	3.83927	9.5398	9.05436	12.6987	12.1234	23.5208	22.8071	34.6465	34.4616
74.448	1.35254	1.31605	4.19238	3.95632	4.54565	4.29631	10.4441	9.89502	13.699	12.9869	25.3374	24.9423	35.5293	35.6893	0.844483	0.83571	3.13452	3.00633	3.98145	3.84552	9.55347	9.067	12.7043	12.1414	23.5403	22.836	34.6777	34.5
74.548	1.36621	1.3182	4.21167	3.96175	4.54956	4.30308	10.469	9.90837	13.7202	13.0058	25.3823	24.9718	35.582	35.7283	0.858154	0.837542	3.14819	3.01093	3.99512	3.85177	9.57092	9.07964	12.7339	12.1595	23.5852	22.8649	34.7305	34.5385
74.648	1.36609	1.32035	4.22546	3.96718	4.5531	4.30985	10.485	9.92171	13.7357	13.0247	25.4213	25.0014	35.6229	35.7673	0.87146	0.839374	3.15588	3.01553	4.00281	3.85801	9.57324	9.09228	12.7494	12.1775	23.6124	22.8937	34.775	34.5768
74.748	1.37207	1.32249	4.23145	3.97261	4.56104	4.31662	10.4868	9.93506	13.7612	13.0436	25.4487	25.0309	35.668	35.8063	0.869873	0.841205	3.15576	3.02013	4.01074	3.86426	9.59424	9.10492	12.761	12.1955	23.6262	22.9226	34.8066	34.6152
74.848	1.38184	1.32463	4.24121	3.97805	4.5708	4.32339	10.5083	9.9484	13.7827	13.0625	25.4858	25.0605	35.709	35.8453	0.879638	0.843036	3.16601	3.02473	4.02051	3.8705	9.59473	9.11755	12.783	12.2135	23.6594	22.9515	34.8477	34.6536
74.948	1.37817	1.32678	4.23901	3.98348	4.56519	4.33016	10.5161	9.96175	13.7827	13.0814	25.5037	25.09	35.748	35.8842	0.873779	0.844867	3.16186	3.02933	4.01489	3.87674	9.60315	9.13018	12.7903	12.2315	23.6868	22.9803	34.8867	34.692
75.048	1.37512	1.32892	4.24622	3.9889	4.56213	4.33693	10.5192	9.97509	13.8053	13.1003	25.5336	25.1195	35.786	35.9232	0.880494	0.846697	3.16077	3.03393	4.01746	3.88298	9.62964	9.14281	12.8148	12.2495	23.715	23.0092	34.9303	34.7303
75.148	1.38379	1.33107	4.2605	3.99433	4.57642	4.34369	10.5278	9.98843	13.8276	13.1192	25.5679	25.149	35.8516	35.9621	0.877929	0.848527	3.17554	3.03852	4.03223	3.88922	9.63269	9.15544	12.8374	12.2675	23.7493	23.038	34.9766	34.7687
75.248	1.37878	1.33321	4.2677	3.99976	4.58362	4.35045	10.5463	10.0018	13.8422	13.1381	25.6058	25.1786	35.8973	36.0011	0.880493	0.850356	3.18787	3.04312	4.03894	3.89546	9.64429	9.16807	12.8558	12.2855	23.7794	23.0668	35.0262	34.807
75.348	1.39038	1.33535	4.27319	4.00519	4.58545	4.35722	10.5601	10.0151	13.8599	13.1569	25.6277	25.2081	35.9309	36.04	0.866943	0.852185	3.18628	3.04771	4.05054	3.9017	9.65015	9.1807	12.8735	12.3035	23.8127	23.0957	35.0615	34.8453
75.448	1.39453	1.33749	4.28516	4.01061	4.59131	4.36398	10.5776	10.0284	13.8699	13.1758	25.6643	25.2376	35.9775	36.0789	0.872803	0.854014	3.19214	3.05231	4.06836	3.90794	9.6687	9.19332	12.8872	12.3215	23.8303	23.1245	35.0986	34.8837
75.548	1.39966	1.33964	4.29395	4.01604	4.6001	4.37074	10.5828	10.0418	13.8843	13.1947	25.7085	25.2671	36.0371	36.1178	0.875488	0.855843	3.20654	3.0569	4.07715	3.91417	9.67078	9.20594	12.9133	12.3395	23.8643	23.1533	35.1501	34.922
75.648	1.39929	1.34178	4.29407	4.02146	4.60583	4.3775	10.5922	10.0551	13.9095	13.2136	25.7281	25.2966	36.0704	36.1567	0.881714	0.857671	3.21838	3.06149	4.0885	3.9204	9.68811	9.21856	12.933	12.3574	23.9054	23.1821	35.1932	34.9603
75.748	1.41101	1.34392	4.30164	4.02689	4.61755	4.38426	10.6156	10.0684	13.9213	13.2324	25.7631	25.3261	36.1207	36.1956	0.885132	0.859499	3.22229	3.06609	4.10632	3.92664	9.71143	9.23118	12.9564	12.3754	23.9366	23.211	35.244	34.9986
75.848	1.42285	1.34606	4.31348	4.03231	4.63916	4.39101	10.6274	10.0818	13.9448	13.2513	25.8025	25.3556	36.1699	36.2344	0.897461	0.861326	3.2168	3.07068	4.11816	3.93287	9.72351	9.24379	12.9761	12.3934	23.97	23.2398	35.2871	35.0368
75.948	1.43445	1.3482	4.32507	4.03774	4.65076	4.39777	10.6508	10.0951	13.9662	13.2702	25.8412	25.385	36.2206	36.2733	0.89685	0.863153	3.22424	3.07527	4.12976	3.9391	9.73132	9.25641	12.9994	12.4114	24.0011	23.2686	35.326	35.0751
76.048	1.43469	1.35034	4.3136	4.04316	4.64539	4.40452	10.6532	10.1084	13.9781	13.289	25.8573	25.4145	36.2599	36.3122	0.88977	0.86498	3.22449	3.07986	4.12634	3.94533	9.74475	9.26902	13.0052	12.4294	24.0326	23.2974	35.3749	35.1133
76.148	1.42859	1.35248	4.3136	4.04858	4.64685	4.41127	10.6547	10.1217	13.986	13.3079	25.8763	25.444	36.285	36.351	0.894897	0.866806	3.2301	3.08445	4.14319	3.95155	9.75073	9.28163	13.0365	12.4473	24.0577	23.3262	35.4257	35.1516
76.248	1.44019	1.35462	4.32715	4.054	4.65283	4.41803	10.6724	10.1351	14.0032	13.3267	25.9136	25.4735	36.3223	36.3898	0.895264	0.868632	3.23389	3.08904	4.1416	3.95778	9.75598	9.29424	13.0425	12.4653	24.0776	23.355	35.4629	35.1898
76.348	1.43787	1.35676	4.31458	4.05942	4.65002	4.42478	10.6718	10.1484	14.0087	13.3456	25.9344	25.5029	36.3549	36.4287	0.898071	0.870458	3.24084	3.09362	4.15051	3.964	9.76221	9.30685	13.0514	12.4832	24.0902	23.3837	35.493	35.228
76.448	1.44409	1.3589	4.31763	4.06484	4.65674	4.43153	10.678	10.1617	14.0229	13.3644	25.9546	25.5324	36.3867	36.4675	0.905273	0.872284	3.24194	3.09821	4.15918	3.97022	9.7782	9.31945	13.0659	12.5012	24.1165	23.4125	35.5352	35.2663
76.548	1.44446	1.36104	4.31921	4.07026	4.66443	4.43827	10.7035	10.175	14.0502	13.3833	25.9935	25.5619	36.4335	36.5063	0.901001	0.874108	3.24597	3.1028	4.16687	3.97645	9.79468	9.33205	13.0909	12.5192	24.1437	23.4413	35.5819	35.3045
76.648	1.44922	1.36317	4.33179	4.07568	4.66968	4.44502	10.7087	10.1883	14.0708	13.4021	26.0337	25.5913	36.4756	36.5451	0.909912	0.875933	3.23706	3.10738	4.17578	3.98267	9.80054	9.34466	13.1082	12.5371	24.1643	23.4701	35.624	35.3427
76.748	1.46069	1.36531	4.34375	4.0811	4.66943	4.45176	10.7183	10.2016	14.0808	13.421	26.0591	25.6208	36.5127	36.5839	0.904053	0.877757	3.23511	3.11197	4.17798	3.98889	9.81238	9.35726	13.1252	12.5551	24.1975	23.4988	35.6611	35.3808
76.848	1.47058	1.36745	4.36121	4.08652	4.66736	4.45851	10.7357	10.215	14.0922	13.4398	26.0807	25.6502	36.5575	36.6226	0.901978	0.879582	3.24646	3.11655	4.17761	3.9951	9.82886	9.36985	13.1371	12.573	24.2323	23.5276	35.6942	35.419
76.948	1.47168	1.36959	4.3623	4.09194	4.68213	4.46525	10.7563	10.2283	14.1128	13.4586	26.1089	25.6796	36.5977	36.6614	0.914794	0.881405	3.26538	3.12114	4.19043	4.00132	9.8252	9.38245	13.1577	12.591	24.2651	23.5563	35.7461	35.4572
77.048	1.46802	1.37172	4.36426	4.09735	4.68213	4.47199	10.7681	10.2416	14.1208	13.4775	26.1284	25.7091	36.635	36.7002	0.903076	0.883228	3.25366	3.12572	4.18677	4.00754	9.82678	9.39504	13.1694	12.6089	24.2842	23.5851	35.7773	35.4953
77.148	1.47156	1.37386	4.37195	4.10277	4.6842	4.47873	10.7758	10.2549	14.1359	13.4963	26.1674	25.7385	36.6776	36.7389	0.910767	0.885051	3.25354	3.1303	4.18835	4.01375	9.84375	9.40763	13.1827	12.6268	24.3175	23.6138	35.8241	35.5335
77.248	1.48242	1.37599	4.3772	4.10818	4.69092	4.48547	10.7866	10.2682	14.1589	13.5151	26.1978	25.7679	36.7239	36.7777	0.9021	0.886874	3.2644	3.13488	4.19922	4.01996	9.84644	9.42022	13.2019	12.6448	24.3535	23.6426	35.8662	35.5716
77.348	1.47583	1.37813	4.37573	4.1136	4.68994	4.49221	10.7974	10.2815	14.1733	13.5339	26.2107	25.7974	36.748	36.8164	0.901123	0.888696	3.26343	3.13947	4.19458	4.02617	9.86304	9.43281	13.2122	12.6627	24.3782	23.6713	35.9006	35.6097
77.448	1.46851	1.38027	4.38672	4.11901	4.69482	4.49895	10.8064	10.2948	14.1782	13.5528	26.2427	25.8268	36.792	36.8551	0.907959	0.890518	3.26221	3.14405	4.19897	4.03238	9.86694	9.4454	13.2329	12.6806	24.4143	23.7	35.9307	35.6478
77.548	1.4729	1.3824	4.39063	4.12443	4.69873	4.50568	10.8159	10.3081	14.1938	13.5716	26.2661	25.8562	36.8235	36.8938	0.911865	0.89234	3.27026	3.14862	4.2168	4.03859	9.87683	9.45798	13.2446	12.6985	24.4204	23.7288	35.9658	35.6859
77.648	1.4823	1.38453	4.40417	4.12984	4.70666	4.51242	10.8373	10.3214	14.2115	13.5904	26.3109	25.8856	36.8837	36.9325	0.913696	0.894161	3.28381	3.1532	4.23035	4.0448	9.86914	9.47057	13.2755	12.7165	24.4532	23.7575	36.0087	35.724
77.748	1.4729	1.38667	4.40259	4.13525	4.70459	4.51915	10.8413	10.3347	14.2249	13.6092	26.3325	25.915	36.9248	36.9712	0.915772	0.895982	3.28369	3.15778	4.23242	4.05101	9.87756	9.48315	13.2859	12.7344	24.4749	23.7862	36.042	35.7621
77.848	1.47913	1.3888	4.40881	4.14066	4.71326	4.52588	10.8597	10.348	14.2399	13.628	26.3588	25.9444	36.9706	37.0099	0.91687	0.897802	3.29651	3.16236	4.23547	4.05721	9.89539	9.49573	13.3002	12.7523	24.5011	23.8149	36.0836	35.8001
77.948	1.48572	1.39094	4.41541	4.14608	4.7157	4.53261	10.868	10.3613	14.2594	13.6468	26.4003	25.9738	37.0157	37.0485	0.911011	0.899622	3.30261	3.16694	4.23547	4.06341	9.90027	9.5083	13.3063	12.7702	24.5267	23.8436	36.1385	35.8382
78.048	1.48816	1.39307	4.4198	4.15149	4.71448	4.53934	10.8842	10.3746	14.274	13.6656	26.4242	26.0032	37.0616	37.0872	0.919555	0.901442	3.31482	3.17151	4.23621	4.06962	9.91455	9.52088	13.3226	12.7881	24.5431	23.8723	36.1923	35.8763
78.148	1.49121	1.3952	4.42285	4.1569	4.71143	4.54607	10.8872	10.3879	14.2847	13.6844	26.4585	26.0326	37.0996	37.1258	0.910889	0.903262	3.31226	3.17609	4.23926	4.07582	9.93042	9.53345	13.343	12.806	24.5774	23.901	36.2322	35.9143
78.248	1.49121	1.39733	4.427	4.1623	4.71558	4.5528	10.9031	10.4012	14.3159	13.7032	26.4822	26.0619	37.168	37.1645	0.916992	0.905081	3.32202	3.18066	4.24902	4.08202	9.94592	9.54603	13.3728	12.8239	24.6067	23.9297	36.2737	35.9523
78.348	1.4989	1.39947	4.43054	4.16771	4.7074	4.55952	10.9144	10.4144	14.3314	13.722	26.5052	26.0913	37.2069	37.2031	0.91272	0.9069	3.33533	3.18524	4.26648	4.08821	9.96643	9.55859	13.38	12.8418	24.6359	23.9584	36.3082	35.9903
78.448	1.50769	1.4016	4.45105	4.17312	4.71619	4.56625	10.9313	10.4277	14.3463	13.7408	26.5416	26.1207	37.2548	37.2417	0.921509	0.908718	3.35022	3.18981	4.26746	4.09441	9.98779	9.57116	13.4144	12.8597	24.6681	23.9871	36.358	36.0283
78.548	1.51562	1.40373	4.44165	4.17853	4.72412	4.57297	10.9465	10.441	14.3579	13.7596	26.563	26.15	37.3135	37.2803	0.933105	0.910536	3.35034	3.19438	4.27539	4.10061	9.9939	9.58373	13.4224	12.8776	24.6992	24.0157	36.4111	36.0663
78.648	1.5022	1.40586	4.4436	4.18394	4.72412	4.57969	10.9587	10.4543	14.366	13.7784	26.5825	26.1794	37.3411	37.3189	0.92749	0.912354	3.34668	3.19895	4.2832	4.1068	10.0117	9.59629	13.4285	12.8955	24.7249	24.0444	36.4424	36.1043
78.748	1.51147	1.40799	4.44922	4.18934	4.73389	4.58641	10.9722	10.4676	14.3948	13.7972	26.6235	26.2088	37.3894	37.3575	0.942871	0.914171	3.33862	3.20352	4.29297	4.113	10.0056	9.60886	13.4419	12.9134	24.7542	24.0731	36.4795	36.1423
78.848	1.51196	1.41012	4.44922	4.19475	4.73389	4.59313	10.9839	10.4809	14.407	13.816	26.6431	26.2381	37.4172	37.3961	0.943359	0.915988	3.33862	3.2081	4.28516	4.11919	10.02	9.62142	13.4536	12.9313	24.7737	24.1017	36.5164	36.1802
78.948	1.51074	1.41225	4.44043	4.20015	4.73682	4.59985	10.989	10.4941	14.4116	13.8347	26.6619	26.2675	37.459	37.4346	0.934082	0.917805	3.34155	3.21267	4.28809	4.12538	10.0455	9.63398	13.4509	12.9491	24.8018	24.1304	36.5566	36.2182
79.048	1.52039	1.41438	4.44446	4.20556	4.74646	4.60657	11.0043	10.5074	14.431	13.8535	26.6947	26.2968	37.494	37.4732	0.947876	0.919621	3.34924	3.21723	4.29211	4.13157	10.0508	9.64653	13.4623	12.967	24.8351	24.159	36.6034	36.2561
79.148	1.51758	1.41651	4.44727	4.21096	4.76709	4.61328	11.0132	10.5207	14.4497	13.8723	26.7231	26.3261	37.5481	37.5117	0.948974	0.921437	3.34839	3.2218	4.30054	4.13775	10.0638	9.65909	13.4829	12.9849	24.8557	24.1877	36.6436	36.2941
79.248	1.5177	1.41864	4.44739	4.21636	4.77649	4.62	11.025	10.534	14.475	13.8911	26.7448	26.3555	37.5887	37.5503	0.954712	0.923253	3.35413	3.22637	4.30676	4.14394	10.071	9.67164	13.5082	13.0028	24.881	24.2163	36.6884	36.332
79.348	1.50879	1.42076	4.44629	4.22176	4.78003	4.62671	11.0317	10.5472	14.4841	13.9098	26.7749	26.3848	37.6348	37.5888	0.957764	0.925068	3.34937	3.23094	4.30566	4.15013	10.0925	9.68419	13.5168	13.0206	24.9153	24.245	36.7227	36.3699
79.448	1.51855	1.42289	4.46973	4.22717	4.77392	4.63342	11.0415	10.5605	14.5015	13.9286	26.8042	26.4141	37.6836	37.6273	0.950195	0.926883	3.35913	3.2355	4.31543	4.15631	10.108	9.69674	13.5444	13.0385	24.9446	24.2736	36.7715	36.4078
79.548	1.51477	1.42502	4.45618	4.23257	4.77209	4.64013	11.0494	10.5738	14.5111	13.9474	26.8199	26.4435	37.7167	37.6658	0.947876	0.928698	3.36096	3.24007	4.31726	4.16249	10.1277	9.70929	13.5504	13.0564	24.9716	24.3022	36.7928	36.4457
79.648	1.51074	1.42715	4.46191	4.23797	4.78345	4.64684	11.0649	10.587	14.5347	13.9661	26.8589	26.4728	37.7559	37.7043	0.951904	0.930512	3.3728	3.24463	4.3291	4.16867	10.1335	9.72183	13.5562	13.0742	25.009	24.3308	36.8457	36.4836
79.748	1.5166	1.42927	4.46777	4.24337	4.80151	4.65355	11.0825	10.6003	14.5447	13.9849	26.8806	26.5021	37.7893	37.7428	0.957764	0.932326	3.36694	3.2492	4.33496	4.17485	10.1481	9.73438	13.5737	13.0921	25.0344	24.3594	36.8828	36.5214
79.848	1.5116	1.4314	4.46692	4.24877	4.79456	4.66026	11.0931	10.6136	14.5531	14.0036	26.8969	26.5314	37.8192	37.7813	0.948852	0.93414	3.36609	3.25376	4.33411	4.18103	10.1542	9.74692	13.5924	13.1099	25.0604	24.3881	36.9247	36.5593
79.948	1.51184	1.43353	4.46472	4.25417	4.79236	4.66696	11.1051	10.6268	14.5648	14.0224	26.9225	26.5607	37.8505	37.8198	0.952759	0.935953	3.35608	3.25832	4.33191	4.18721	10.1638	9.75946	13.5902	13.1278	25.0844	24.4167	36.9598	36.5971
80.048	1.51587	1.43565	4.48462	4.25956	4.80615	4.67367	11.1184	10.6401	14.5903	14.0411	26.9556	26.59	37.9016	37.8582	0.96289	0.937766	3.36987	3.26289	4.3457	4.19339	10.1783	9.772	13.6118	13.1456	25.1172	24.4453	37.0071	36.635
80.148	1.51257	1.43778	4.47156	4.26496	4.8053	4.68037	11.1295	10.6533	14.6127	14.0599	26.9857	26.6193	37.9393	37.8967	0.957398	0.939578	3.3783	3.26745	4.33875	4.19956	10.1989	9.78454	13.6263	13.1635	25.1378	24.4739	37.037	36.6728
80.248	1.52527	1.4399	4.48425	4.27036	4.81384	4.68707	11.1498	10.6666	14.6334	14.0786	27.0123	26.6486	37.9794	37.9351	0.958862	0.94139	3.38904	3.27201	4.34778	4.20573	10.2126	9.79707	13.639	13.1813	25.1874	24.5024	37.0887	36.7106
80.348	1.52368	1.44203	4.48633	4.27576	4.82373	4.69377	11.1636	10.6799	14.6509	14.0974	27.0337	26.6778	38.0188	37.9735	0.956787	0.943202	3.39722	3.27657	4.34375	4.21191	10.2185	9.8096	13.6431	13.1991	25.2095	24.531	37.1221	36.7484
80.448	1.51367	1.44415	4.48853	4.28115	4.82959	4.70047	11.1772	10.6931	14.6646	14.1161	27.0632	26.7071	38.0596	38.0119	0.958984	0.945014	3.39941	3.28113	4.34961	4.21808	10.236	9.82213	13.6606	13.217	25.2307	24.5596	37.1553	36.7862
80.548	1.52136	1.44627	4.49207	4.28655	4.83362	4.70717	11.1849	10.7064	14.6876	14.1348	27.098	26.7364	38.1063	38.0503	0.958374	0.946825	3.3988	3.28568	4.3573	4.22425	10.2565	9.83466	13.6761	13.2348	25.2579	24.5882	37.1942	36.824
80.648	1.52454	1.4484	4.50085	4.29194	4.83264	4.71387	11.2054	10.7196	14.7047	14.1536	27.1227	26.7657	38.1542	38.0887	0.971313	0.948636	3.41174	3.29024	4.36609	4.23042	10.2662	9.84719	13.6967	13.2526	25.2899	24.6168	37.2362	36.8618
80.748	1.51843	1.45052	4.505	4.29733	4.8363	4.72056	11.2194	10.7329	14.722	14.1723	27.1576	26.7949	38.2167	38.1271	0.963745	0.950446	3.40979	3.2948	4.37219	4.23658	10.2859	9.85972	13.7086	13.2704	25.3197	24.6453	37.285	36.8995
80.848	1.52637	1.45264	4.50879	4.30273	4.85596	4.72726	11.2329	10.7461	14.7458	14.191	27.1851	26.8242	38.26	38.1655	0.967529	0.952256	3.42334	3.29936	4.37402	4.24275	10.2946	9.87224	13.7124	13.2883	25.343	24.6739	37.3242	36.9373
80.948	1.51379	1.45477	4.50964	4.30812	4.85315	4.73395	11.2338	10.7593	14.7523	14.2097	27.2054	26.8534	38.2977	38.2039	0.958618	0.954066	3.41687	3.30391	4.37488	4.24891	10.3053	9.88476	13.7306	13.3061	25.3807	24.7024	37.3524	36.975
81.048	1.51477	1.45689	4.5321	4.31351	4.85779	4.74064	11.2543	10.7726	14.7709	14.2285	27.2474	26.8827	38.3302	38.2422	0.96936	0.955875	3.42346	3.30847	4.38196	4.25508	10.3212	9.89728	13.7552	13.3239	25.4115	24.731	37.3944	37.0127
81.148	1.50915	1.45901	4.53259	4.3189	4.86194	4.74733	11.2665	10.7858	14.7831	14.2472	27.2753	26.9119	38.3615	38.2805	0.96936	0.957685	3.42151	3.31302	4.38562	4.26124	10.3247	9.9098	13.7711	13.3417	25.4464	24.7595	37.4376	37.0505
81.248	1.50659	1.46113	4.53369	4.32429	4.87158	4.75402	11.262	10.7991	14.792	14.2659	27.2903	26.9412	38.4021	38.3189	0.977051	0.959493	3.42725	3.31757	4.3877	4.2674	10.3474	9.92232	13.7844	13.3595	25.4736	24.7881	37.4705	37.0882
81.348	1.50976	1.46325	4.54907	4.32968	4.88232	4.76071	11.283	10.8123	14.8325	14.2846	27.3364	26.9704	38.4426	38.3572	0.976562	0.961302	3.43042	3.32213	4.39844	4.27356	10.3474	9.93483	13.7993	13.3773	25.5044	24.8166	37.5068	37.1259
81.448	1.52148	1.46537	4.53931	4.33507	4.87061	4.7674	11.2866	10.8255	14.8406	14.3033	27.3523	26.9996	38.4697	38.3955	0.970459	0.96311	3.43604	3.32668	4.39844	4.27971	10.3696	9.94734	13.8071	13.3951	25.5178	24.8451	37.5381	37.1635
81.548	1.52026	1.46749	4.5437	4.34046	4.87549	4.77408	11.3052	10.8388	14.8567	14.322	27.3762	27.0289	38.5156	38.4338	0.980957	0.964917	3.43921	3.33123	4.40894	4.28587	10.3809	9.95985	13.8257	13.4129	25.5479	24.8736	37.5913	37.2012
81.648	1.5293	1.46961	4.56055	4.34585	4.89575	4.78077	11.3159	10.852	14.8735	14.3407	27.4165	27.0581	38.5576	38.4721	0.982177	0.966725	3.44409	3.33578	4.41797	4.29203	10.3844	9.97236	13.8364	13.4307	25.5764	24.9022	37.6204	37.2389
81.748	1.53113	1.47173	4.56458	4.35124	4.90393	4.78745	11.3353	10.8652	14.9064	14.3594	27.4518	27.0873	38.6044	38.5104	0.989868	0.968532	3.44006	3.34033	4.42566	4.29818	10.4049	9.98487	13.8441	13.4485	25.6019	24.9307	37.6588	37.2765
81.848	1.53625	1.47385	4.56921	4.35662	4.90857	4.79413	11.3519	10.8785	14.9274	14.3781	27.476	27.1165	38.6525	38.5487	1.00061	0.970338	3.44885	3.34488	4.43445	4.30433	10.4227	9.99737	13.8646	13.4663	25.6261	24.9592	37.7128	37.3142
81.948	1.53625	1.47597	4.57532	4.36201	4.91101	4.80082	11.3698	10.8917	14.9469	14.3968	27.5094	27.1457	38.6915	38.5869	0.994995	0.972145	3.46057	3.34943	4.43494	4.31048	10.4351	10.0099	13.8785	13.484	25.6517	24.9877	37.7557	37.3518
82.048	1.54297	1.47809	4.57642	4.3674	4.91162	4.80749	11.3728	10.9049	14.9614	14.4155	27.5417	27.1749	38.7373	38.6252	1.00171	0.973951	3.46362	3.35398	4.42969	4.31663	10.4508	10.0224	13.8989	13.5018	25.678	25.0162	37.7959	37.3894
82.148	1.54114	1.48021	4.56848	4.37278	4.91345	4.81417	11.3783	10.9182	14.9769	14.4342	27.559	27.2041	38.7802	38.6634	0.995728	0.975756	3.46545	3.35852	4.44495	4.32278	10.4626	10.0349	13.9008	13.5196	25.7013	25.0447	37.829	37.427
82.248	1.53516	1.48233	4.57617	4.37817	4.92944	4.82085	11.4019	10.9314	15.0083	14.4529	27.6021	27.2333	38.835	38.7016	1.00757	0.977561	3.47925	3.36307	4.44946	4.32893	10.4766	10.0474	13.9358	13.5374	25.7327	25.0732	37.8743	37.4646
82.348	1.53516	1.48444	4.57617	4.38355	4.92334	4.82753	11.4019	10.9446	15.02	14.4715	27.616	27.2625	38.8567	38.7399	1.00757	0.979366	3.46753	3.36762	4.44531	4.33508	10.4783	10.0599	13.9419	13.5552	25.7583	25.1016	37.9014	37.5022
82.448	1.53735	1.48656	4.58203	4.38893	4.92358	4.8342	11.4194	10.9578	15.03	14.4902	27.6489	27.2917	38.8933	38.7781	1.00171	0.981171	3.47339	3.37216	4.45117	4.34122	10.4841	10.0724	13.9595	13.5729	25.7795	25.1301	37.9463	37.5398
82.548	1.53345	1.48868	4.58789	4.39432	4.91968	4.84087	11.4275	10.971	15.0415	14.5089	27.6785	27.3209	38.9365	38.8163	1.00391	0.982975	3.47925	3.37671	4.45142	4.34737	10.4938	10.0849	13.9731	13.5907	25.8049	25.1586	37.9834	37.5774
82.648	1.53479	1.49079	4.59753	4.3997	4.92517	4.84755	11.4447	10.9843	15.0707	14.5276	27.7306	27.3501	38.9816	38.8545	1.01306	0.984779	3.48108	3.38125	4.45129	4.35351	10.5126	10.0973	13.9884	13.6084	25.8341	25.1871	38.0206	37.6149
82.748	1.54602	1.49291	4.60461	4.40508	4.94958	4.85422	11.4518	10.9975	15.0892	14.5463	27.7692	27.3792	39.0253	38.8926	1.02209	0.986583	3.4801	3.38579	4.45789	4.35965	10.519	10.1098	14.017	13.6262	25.8566	25.2155	38.0526	37.6525
82.848	1.54321	1.49502	4.60547	4.41046	4.95288	4.86089	11.4604	11.0107	15.1079	14.5649	27.8013	27.4084	39.0635	38.9308	1.02905	0.988386	3.48706	3.39034	4.46484	4.36579	10.5409	10.1223	14.0317	13.644	25.8909	25.244	38.0908	37.69
82.948	1.54089	1.49714	4.61902	4.41584	4.96814	4.86756	11.4857	11.0239	15.1332	14.5836	27.8344	27.4376	39.1161	38.969	1.03088	0.990189	3.50623	3.39488	4.47839	4.37193	10.5514	10.1348	14.0453	13.6617	25.9242	25.2724	38.1434	37.7275
83.048	1.54578	1.49925	4.62585	4.42122	4.97302	4.87422	11.4984	11.0371	15.1459	14.6022	27.8551	27.4667	39.16	39.0071	1.0321	0.991991	3.50916	3.39942	4.47156	4.37806	10.5671	10.1473	14.0675	13.6795	25.9425	25.3009	38.1796	37.765
83.148	1.55371	1.50137	4.63013	4.4266	4.97729	4.88089	11.5181	11.0503	15.1675	14.6209	27.8901	27.4959	39.2034	39.0453	1.02222	0.993793	3.51758	3.40396	4.49121	4.3842	10.5905	10.1598	14.0874	13.6972	25.97	25.3293	38.2285	37.8025
83.248	1.55969	1.50348	4.63367	4.43198	4.98083	4.88755	11.5333	11.0635	15.1849	14.6396	27.931	27.525	39.2518	39.0834	1.03186	0.995595	3.51892	3.4085	4.49109	4.39033	10.5925	10.1722	14.1027	13.7149	25.9955	25.3578	38.2694	37.84
83.348	1.54785	1.5056	4.63013	4.43736	4.97729	4.89422	11.5437	11.0767	15.1931	14.6582	27.947	27.5542	39.2813	39.1215	1.02612	0.997397	3.5271	3.41304	4.4895	4.39647	10.5984	10.1847	14.1226	13.7327	26.0166	25.3862	38.3105	37.8775
83.448	1.55371	1.50771	4.63184	4.44273	4.979	4.90088	11.5571	11.0899	15.2026	14.6769	27.9683	27.5833	39.3245	39.1596	1.02637	0.999198	3.52685	3.41757	4.48926	4.4026	10.6093	10.1972	14.1362	13.7504	26.0425	25.4146	38.344	37.915
83.548	1.55286	1.50982	4.63098	4.44811	4.97815	4.90754	11.5599	11.1031	15.2289	14.6955	28.0023	27.6124	39.3622	39.1977	1.01331	1.001	3.53943	3.42211	4.48645	4.40873	10.6302	10.2097	14.1508	13.7681	26.076	25.443	38.3854	37.9524
83.648	1.56042	1.51194	4.63855	4.45348	4.98572	4.9142	11.5736	11.1163	15.2504	14.7142	28.0433	27.6416	39.4149	39.2358	1.02893	1.0028	3.55139	3.42665	4.49597	4.41486	10.6433	10.2221	14.1705	13.7859	26.1097	25.4715	38.4386	37.9899
83.748	1.55762	1.51405	4.65918	4.45886	5.00635	4.92086	11.5906	11.1295	15.2673	14.7328	28.0681	27.6707	39.4629	39.2739	1.03418	1.0046	3.5603	3.43118	4.50488	4.42098	10.6494	10.2346	14.1831	13.8036	26.134	25.4999	38.4727	38.0273
83.848	1.55395	1.51616	4.65918	4.46423	5.00635	4.92751	11.5923	11.1427	15.269	14.7514	28.0779	27.6998	39.5022	39.3119	1.02026	1.0064	3.54858	3.43572	4.50488	4.42711	10.6531	10.2471	14.1948	13.8213	26.1536	25.5283	38.5095	38.0647
83.948	1.54785	1.51827	4.65918	4.46961	5.00635	4.93417	11.604	11.1559	15.2808	14.7701	28.103	27.7289	39.5352	39.35	1.00293	1.0082	3.54858	3.44025	4.50122	4.43324	10.6589	10.2595	14.2026	13.839	26.1653	25.5567	38.5547	38.1021
84.048	1.54004	1.52038	4.66504	4.47498	5.00659	4.94082	11.6121	11.1691	15.2888	14.7887	28.1265	27.758	39.5703	39.388	1.00635	1.01	3.55249	3.44479	4.50464	4.43936	10.6696	10.272	14.2122	13.8568	26.1851	25.5851	38.5859	38.1396
84.148	1.55261	1.52249	4.67566	4.48035	5.01306	4.94748	11.6283	11.1823	15.3107	14.8074	28.1586	27.7871	39.6219	39.4261	1.01746	1.0118	3.56091	3.44932	4.51941	4.44548	10.6833	10.2845	14.2406	13.8745	26.2208	25.6135	38.6395	38.1769
84.248	1.55469	1.5246	4.67773	4.48573	5.01929	4.95413	11.6304	11.1955	15.3328	14.826	28.1919	27.8162	39.6514	39.4641	1.00757	1.01359	3.55737	3.45385	4.52148	4.4516	10.6951	10.2969	14.2427	13.8922	26.2424	25.6418	38.6689	38.2143
84.348	1.56079	1.52671	4.68945	4.4911	5.03052	4.96078	11.6519	11.2087	15.352	14.8446	28.2292	27.8453	39.7004	39.5021	1.00391	1.01539	3.56909	3.45838	4.52954	4.45772	10.6973	10.3094	14.2622	13.9099	26.2639	25.6702	38.7175	38.2517
84.448	1.54883	1.52882	4.69165	4.49647	5.04272	4.96743	11.6636	11.2219	15.3599	14.8632	28.2524	27.8744	39.7354	39.5401	0.997803	1.01719	3.56909	3.46292	4.52539	4.46384	10.7134	10.3218	14.2739	13.9276	26.2798	25.6986	38.7493	38.2891
84.548	1.55371	1.53093	4.69604	4.50184	5.0415	4.97408	11.6665	11.2351	15.3801	14.8818	28.2844	27.9035	39.783	39.5781	1.00635	1.01899	3.57764	3.46745	4.53393	4.46996	10.7241	10.3343	14.2942	13.9453	26.3057	25.727	38.7847	38.3264
84.648	1.55273	1.53304	4.70117	4.50721	5.04053	4.98073	11.6792	11.2483	15.3931	14.9005	28.3113	27.9326	39.8193	39.6161	0.999755	1.02078	3.57495	3.47198	4.53345	4.47608	10.7355	10.3468	14.3035	13.963	26.3186	25.7553	38.8271	38.3637
84.748	1.55579	1.53515	4.69861	4.51258	5.04358	4.98737	11.6957	11.2614	15.4078	14.9191	28.3414	27.9617	39.85	39.654	1.00281	1.02258	3.578	3.4765	4.53235	4.48219	10.7524	10.3592	14.3121	13.9807	26.3412	25.7837	38.8671	38.4011
84.848	1.56348	1.53726	4.70581	4.51795	5.06665	4.99402	11.7192	11.2746	15.4155	14.9377	28.3896	27.9907	39.8826	39.692	1.0083	1.02438	3.58936	3.48103	4.5437	4.4883	10.7643	10.3716	14.3235	13.9984	26.3838	25.812	38.9099	38.4384
84.948	1.56921	1.53937	4.71765	4.52331	5.07288	5.00066	11.7328	11.2878	15.4291	14.9563	28.433	28.0198	39.9257	39.7299	1.02014	1.02617	3.6012	3.48556	4.54993	4.49442	10.7813	10.3841	14.3431	14.0161	26.4034	25.8404	38.953	38.4757
85.048	1.56641	1.54148	4.72656	4.52868	5.07764	5.0073	11.7417	11.301	15.4497	14.9749	28.4614	28.0489	39.9736	39.7679	1.02905	1.02797	3.59839	3.49009	4.56641	4.50053	10.7764	10.3965	14.3638	14.0337	26.4358	25.8687	38.9932	38.513
85.148	1.56763	1.54358	4.72778	4.53405	5.07886	5.01394	11.7603	11.3141	15.4587	14.9935	28.4861	28.0779	39.998	39.8058	1.02222	1.02976	3.60889	3.49461	4.57129	4.50664	10.7858	10.409	14.3743	14.0514	26.4565	25.8971	39.0293	38.5502
85.248	1.56726	1.54569	4.74109	4.53941	5.08044	5.02058	11.7738	11.3273	15.4757	15.0121	28.5072	28.107	40.037	39.8437	1.02014	1.03156	3.60901	3.49914	4.57703	4.51274	10.7937	10.4214	14.3883	14.0691	26.4777	25.9254	39.0587	38.5875
85.348	1.5752	1.5478	4.7373	4.54478	5.08838	5.02722	11.7878	11.3405	15.5015	15.0307	28.5347	28.136	40.0803	39.8816	1.02441	1.03335	3.61694	3.50366	4.5813	4.51885	10.8132	10.4339	14.4038	14.0868	26.5051	25.9537	39.0918	38.6248
85.448	1.57935	1.5499	4.7395	4.55014	5.09058	5.03386	11.7915	11.3537	15.5171	15.0493	28.562	28.1651	40.1328	39.9195	1.03174	1.03515	3.61694	3.50819	4.58301	4.52496	10.8269	10.4463	14.4312	14.1044	26.5325	25.982	39.1309	38.662
85.548	1.58105	1.55201	4.74121	4.55551	5.08667	5.0405	11.8015	11.3668	15.5291	15.0679	28.5991	28.1941	40.1699	39.9574	1.02637	1.03694	3.6228	3.51271	4.58887	4.53106	10.8346	10.4587	14.437	14.1221	26.5579	26.0104	39.166	38.6993
85.648	1.58875	1.55411	4.75696	4.56087	5.10168	5.04713	11.8148	11.38	15.5404	15.0865	28.6263	28.2231	40.2013	39.9953	1.02795	1.03874	3.63049	3.51723	4.59851	4.53716	10.858	10.4712	14.4564	14.1398	26.5795	26.0387	39.205	38.7365
85.748	1.59485	1.55622	4.76257	4.56623	5.11951	5.05376	11.8383	11.3932	15.5638	15.1051	28.6539	28.2521	40.2499	40.0331	1.03967	1.04053	3.64416	3.52175	4.60657	4.54327	10.8601	10.4836	14.476	14.1574	26.6066	26.067	39.2479	38.7737
85.848	1.59277	1.55832	4.75903	4.5716	5.12158	5.0604	11.8445	11.4063	15.5737	15.1236	28.6772	28.2812	40.2737	40.071	1.03809	1.04232	3.63452	3.52628	4.60254	4.54937	10.8739	10.496	14.4917	14.1751	26.6399	26.0953	39.2773	38.8109
85.948	1.59875	1.56043	4.76453	4.57696	5.12561	5.06703	11.8597	11.4195	15.5914	15.1422	28.7103	28.3102	40.3182	40.1088	1.04358	1.04411	3.64417	3.5308	4.61218	4.55546	10.8767	10.5085	14.5092	14.1927	26.6691	26.1236	39.3182	38.8481
86.048	1.59375	1.56253	4.77344	4.58232	5.13037	5.07366	11.8765	11.4327	15.6194	15.1608	28.7351	28.3392	40.3665	40.1467	1.04468	1.04591	3.65308	3.53532	4.61743	4.56156	10.8856	10.5209	14.5298	14.2104	26.6897	26.1519	39.343	38.8853
86.148	1.59094	1.56464	4.77063	4.58768	5.13928	5.08029	11.8737	11.4458	15.6171	15.1794	28.7535	28.3682	40.3966	40.1845	1.04187	1.0477	3.64246	3.53983	4.60852	4.56766	10.8961	10.5333	14.527	14.228	26.7008	26.1802	39.371	38.9224
86.248	1.59949	1.56674	4.77551	4.59304	5.13611	5.08691	11.8939	11.459	15.6332	15.1979	28.7855	28.3972	40.4364	40.2223	1.03503	1.04949	3.651	3.54435	4.61707	4.57375	10.9069	10.5457	14.5433	14.2457	26.7247	26.2084	39.4247	38.9596
86.348	1.5929	1.56884	4.77649	4.5984	5.15491	5.09354	11.9144	11.4721	15.6598	15.2165	28.8256	28.4262	40.4862	40.2601	1.03967	1.05128	3.66174	3.54887	4.61609	4.57985	10.9255	10.5582	14.5658	14.2633	26.757	26.2367	39.455	38.9967
86.448	1.5957	1.57094	4.77734	4.60376	5.15771	5.10016	11.9214	11.4853	15.6685	15.2351	28.8521	28.4552	40.5266	40.2979	1.04663	1.05307	3.65698	3.55339	4.62305	4.58594	10.9209	10.5706	14.5728	14.281	26.7834	26.265	39.4932	39.0339
86.548	1.59668	1.57305	4.77637	4.60911	5.15674	5.10679	11.9265	11.4984	15.6675	15.2536	28.8823	28.4842	40.5605	40.3357	1.04199	1.05486	3.65601	3.5579	4.62402	4.59203	10.9321	10.583	14.5876	14.2986	26.7964	26.2933	39.5117	39.071
86.648	1.59692	1.57515	4.78223	4.61447	5.16064	5.11341	11.9285	11.5116	15.6794	15.2722	28.9021	28.5132	40.5977	40.3734	1.04541	1.05665	3.66187	3.56242	4.62793	4.59812	10.9413	10.5954	14.5935	14.3162	26.8157	26.3215	39.5469	39.1081
86.748	1.59949	1.57725	4.79089	4.61983	5.16565	5.12003	11.9447	11.5247	15.7015	15.2908	28.9415	28.5422	40.6571	40.4112	1.04675	1.05844	3.66272	3.56693	4.63098	4.60421	10.9569	10.6078	14.5961	14.3339	26.8478	26.3498	39.5829	39.1452
86.848	1.61316	1.57935	4.79895	4.62518	5.17322	5.12665	11.9547	11.5379	15.7269	15.3093	28.9752	28.5711	40.7042	40.4489	1.05627	1.06023	3.67639	3.57145	4.6405	4.6103	10.9644	10.6202	14.6176	14.3515	26.881	26.378	39.6278	39.1823
86.948	1.62109	1.58145	4.80273	4.63054	5.18335	5.13327	11.9683	11.551	15.739	15.3279	29.0161	28.6001	40.7471	40.4867	1.05249	1.06202	3.68433	3.57596	4.64844	4.61638	10.9811	10.6326	14.6335	14.3691	26.8967	26.4063	39.667	39.2194
87.048	1.61829	1.58355	4.80188	4.63589	5.18201	5.13988	11.9789	11.5642	15.7474	15.3464	29.0385	28.6291	40.7892	40.5244	1.0553	1.06381	3.67542	3.58047	4.64563	4.62247	10.9977	10.645	14.64	14.3867	26.9191	26.4345	39.6971	39.2565
87.148	1.63074	1.58565	4.80872	4.64125	5.19495	5.1465	12.0035	11.5773	15.7662	15.365	29.0709	28.658	40.8522	40.5621	1.05652	1.0656	3.69202	3.58499	4.65808	4.62855	11.0116	10.6575	14.6683	14.4043	26.9554	26.4627	39.7469	39.2935
87.248	1.62708	1.58775	4.81042	4.6466	5.18884	5.15312	12.0094	11.5904	15.7894	15.3835	29.098	28.687	40.9034	40.5998	1.05823	1.06738	3.69983	3.5895	4.66589	4.63463	11.0181	10.6699	14.684	14.4219	26.9823	26.491	39.7994	39.3306
87.348	1.62793	1.58985	4.81738	4.65195	5.1958	5.15973	12.022	11.6036	15.8044	15.402	29.1323	28.7159	40.9397	40.6375	1.05176	1.06917	3.70679	3.59401	4.66724	4.64071	11.0264	10.6823	14.7026	14.4395	27.0093	26.5192	39.8301	39.3676
87.448	1.62231	1.59195	4.82153	4.65731	5.1958	5.16634	12.0298	11.6167	15.8118	15.4206	29.1672	28.7449	40.9531	40.6752	1.04761	1.07096	3.70679	3.59852	4.66309	4.64679	11.0398	10.6947	14.7166	14.4572	27.0247	26.5474	39.873	39.4046
87.548	1.6123	1.59405	4.81348	4.66266	5.19604	5.17295	12.0474	11.6299	15.8416	15.4391	29.1931	28.7738	40.998	40.7129	1.05347	1.07275	3.70679	3.60303	4.66894	4.65287	11.0426	10.7071	14.7183	14.4748	27.0618	26.5756	39.9119	39.4416
87.648	1.61511	1.59615	4.81628	4.66801	5.20251	5.17956	12.0502	11.643	15.8424	15.4576	29.2113	28.8028	41.0284	40.7505	1.04456	1.07453	3.70959	3.60753	4.67737	4.65895	11.0449	10.7194	14.7328	14.4924	27.0841	26.6038	39.9464	39.4786
87.748	1.62305	1.59825	4.82056	4.67336	5.2124	5.18617	12.074	11.6561	15.8579	15.4762	29.2505	28.8317	41.0657	40.7882	1.04883	1.07632	3.71753	3.61204	4.69141	4.66502	11.0543	10.7318	14.7485	14.5099	27.1116	26.632	39.9873	39.5156
87.848	1.62512	1.60034	4.82214	4.67871	5.21814	5.19278	12.0756	11.6693	15.8715	15.4947	29.2758	28.8606	41.0985	40.8258	1.04065	1.07811	3.70789	3.61655	4.69153	4.67109	11.0702	10.7442	14.766	14.5275	27.1368	26.6602	40.0243	39.5526
87.948	1.62878	1.60244	4.82996	4.68406	5.22034	5.19938	12.0914	11.6824	15.8854	15.5132	29.3031	28.8896	41.1454	40.8635	1.04846	1.07989	3.71521	3.62106	4.69885	4.67717	11.0819	10.7566	14.7816	14.5451	27.1759	26.6884	40.069	39.5896
88.048	1.63489	1.60454	4.83606	4.68941	5.22595	5.20599	12.0992	11.6955	15.8951	15.5317	29.3405	28.9185	41.1849	40.9011	1.05652	1.08168	3.72546	3.62556	4.70544	4.68324	11.0981	10.769	14.8014	14.5627	27.2094	26.7166	40.1085	39.6265
88.148	1.6377	1.60663	4.84082	4.69475	5.23486	5.21259	12.1021	11.7086	15.9116	15.5502	29.3704	28.9474	41.2205	40.9387	1.06494	1.08346	3.73389	3.63007	4.70972	4.68931	11.1035	10.7814	14.8176	14.5803	27.2393	26.7448	40.1482	39.6635
88.248	1.63086	1.60873	4.84375	4.7001	5.25513	5.21919	12.1187	11.7218	15.9304	15.5688	29.4106	28.9763	41.2686	40.9763	1.07397	1.08525	3.74487	3.63457	4.71875	4.69538	11.1023	10.7938	14.8328	14.5979	27.2795	26.7729	40.1963	39.7004
88.348	1.62598	1.61083	4.84668	4.70545	5.26416	5.22579	12.1257	11.7349	15.9272	15.5873	29.4353	29.0052	41.3027	41.0139	1.06519	1.08703	3.73608	3.63907	4.72168	4.70145	11.1313	10.8062	14.8352	14.6154	27.2964	26.8011	40.2305	39.7373
88.448	1.62988	1.61292	4.8562	4.71079	5.27563	5.23239	12.1465	11.748	15.9563	15.6058	29.4602	29.0341	41.3513	41.0514	1.07471	1.08881	3.73779	3.64358	4.7312	4.70751	11.1346	10.8185	14.8625	14.633	27.333	26.8293	40.2712	39.7742
88.548	1.62903	1.61502	4.85388	4.71614	5.27893	5.23899	12.1581	11.7611	15.9713	15.6243	29.4948	29.063	41.3802	41.089	1.07434	1.0906	3.74109	3.64808	4.72888	4.71358	11.1606	10.8309	14.8737	14.6506	27.3558	26.8574	40.3192	39.8111
88.648	1.64331	1.61711	4.86401	4.72148	5.2876	5.24559	12.178	11.7742	15.9856	15.6428	29.5403	29.0919	41.4294	41.1265	1.07471	1.09238	3.75537	3.65258	4.7312	4.71964	11.1658	10.8433	14.8997	14.6682	27.4014	26.8856	40.3613	39.848
88.748	1.64282	1.61921	4.86914	4.72683	5.28857	5.25219	12.1892	11.7874	16.0066	15.6613	29.5613	29.1208	41.47	41.1641	1.07983	1.09416	3.74878	3.65708	4.74609	4.7257	11.1738	10.8557	14.9146	14.6857	27.4224	26.9137	40.4053	39.8849
88.848	1.63086	1.6213	4.87305	4.73217	5.30029	5.25878	12.1968	11.8005	16.0142	15.6798	29.5981	29.1496	41.499	41.2016	1.06836	1.09595	3.75269	3.66158	4.74219	4.73176	11.1843	10.868	14.9302	14.7033	27.4453	26.9419	40.4365	39.9218
88.948	1.63574	1.62339	4.87793	4.73751	5.30884	5.26537	12.2073	11.8136	16.0461	15.6983	29.6262	29.1785	41.5466	41.2391	1.07642	1.09773	3.75757	3.66608	4.75073	4.73782	11.1882	10.8804	14.9465	14.7208	27.4622	26.97	40.4763	39.9586
89.048	1.63965	1.62549	4.8916	4.74286	5.31519	5.27197	12.2368	11.8267	16.0583	15.7168	29.6731	29.2074	41.5842	41.2766	1.09253	1.09951	3.75928	3.67058	4.76074	4.74388	11.2037	10.8928	14.9683	14.7384	27.4973	26.9982	40.5176	39.9955
89.148	1.64734	1.62758	4.89929	4.7482	5.31311	5.27856	12.2445	11.8398	16.0814	15.7352	29.7008	29.2362	41.6268	41.3141	1.09241	1.10129	3.77307	3.67508	4.76843	4.74994	11.2178	10.9052	14.9838	14.7559	27.5245	27.0263	40.5448	40.0323
89.248	1.64966	1.62967	4.89966	4.75354	5.31299	5.28515	12.2585	11.8529	16.0991	15.7537	29.7375	29.2651	41.6523	41.3516	1.09839	1.10307	3.76733	3.67957	4.77075	4.75599	11.2212	10.9175	15.0071	14.7735	27.5442	27.0544	40.6016	40.0691
89.348	1.64722	1.63176	4.90503	4.75888	5.33423	5.29173	12.262	11.866	16.1108	15.7722	29.7749	29.294	41.6953	41.3891	1.09619	1.10485	3.77686	3.68407	4.77417	4.76205	11.2566	10.9299	15.0288	14.791	27.585	27.0825	40.6384	40.1059
89.448	1.66309	1.63386	4.93262	4.76422	5.3501	5.29832	12.2856	11.8791	16.1421	15.7907	29.8179	29.3228	41.7383	41.4266	1.11206	1.10663	3.78491	3.68856	4.79004	4.7681	11.2614	10.9422	15.0464	14.8086	27.6147	27.1106	40.6758	40.1427
89.548	1.66589	1.63595	4.92981	4.76956	5.35291	5.30491	12.2965	11.8922	16.153	15.8092	29.8365	29.3516	41.7765	41.464	1.11121	1.10841	3.776	3.69306	4.7948	4.77415	11.2809	10.9546	15.0687	14.8261	27.6444	27.1387	40.7098	40.1795
89.648	1.67004	1.63804	4.93347	4.7749	5.35706	5.31149	12.306	11.9053	16.1627	15.8276	29.8578	29.3805	41.8094	41.5015	1.10681	1.11019	3.78943	3.69755	4.80261	4.7802	11.2957	10.967	15.0785	14.8436	27.6722	27.1668	40.7604	40.2163
89.748	1.67871	1.64013	4.94458	4.78023	5.36768	5.31808	12.3325	11.9184	16.1909	15.8461	29.9038	29.4093	41.8499	41.5389	1.11987	1.11197	3.79663	3.70205	4.81738	4.78625	11.3026	10.9793	15.105	14.8612	27.7063	27.1949	40.8125	40.253
89.848	1.68152	1.64222	4.94128	4.78557	5.3783	5.32466	12.347	11.9315	16.2015	15.8646	29.9225	29.4381	41.8759	41.5763	1.12268	1.11375	3.79163	3.70654	4.82019	4.7923	11.3121	10.9917	15.1273	14.8787	27.7328	27.223	40.8466	40.2898
89.948	1.67004	1.64431	4.94519	4.79091	5.37659	5.33124	12.3588	11.9446	16.2135	15.883	29.9515	29.467	41.9269	41.6137	1.10925	1.11553	3.79187	3.71103	4.81848	4.79835	11.3163	11.004	15.1429	14.8962	27.7501	27.2511	40.87	40.3265
90.048	1.66809	1.6464	4.94934	4.79624	5.37659	5.33782	12.3766	11.9577	16.2311	15.9015	29.9752	29.4958	41.9562	41.6511	1.10925	1.11731	3.78381	3.71552	4.81848	4.80439	11.3258	11.0164	15.1549	14.9137	27.7855	27.2792	40.9132	40.3632
90.148	1.67761	1.64849	4.95886	4.80158	5.38611	5.3444	12.3939	11.9708	16.2523	15.9199	30.0006	29.5246	41.9969	41.6885	1.11877	1.11909	3.79163	3.72001	4.828	4.81043	11.3375	11.0287	15.1608	14.9312	27.8146	27.3073	40.954	40.3999
90.248	1.67786	1.65058	4.95911	4.80691	5.3844	5.35097	12.4039	11.9839	16.2604	15.9384	30.0316	29.5534	42.0245	41.7259	1.10925	1.12087	3.80115	3.7245	4.83191	4.81648	11.3696	11.0411	15.1703	14.9487	27.8497	27.3353	40.9872	40.4367
90.348	1.69214	1.65267	4.97339	4.81225	5.39868	5.35755	12.4182	11.997	16.2942	15.9569	30.0774	29.5822	42.0681	41.7633	1.11182	1.12264	3.81201	3.72899	4.83862	4.82252	11.3757	11.0534	15.1965	14.9663	27.8779	27.3634	41.0425	40.4733
90.448	1.69458	1.65475	4.97949	4.81758	5.40112	5.36412	12.4321	12.0101	16.3003	15.9753	30.103	29.611	42.1055	41.8006	1.11792	1.12442	3.81811	3.73348	4.84473	4.82856	11.3896	11.0658	15.2107	14.9838	27.9075	27.3915	41.0803	40.51
90.548	1.69629	1.65684	4.98169	4.82291	5.40283	5.3707	12.446	12.0231	16.322	15.9937	30.1421	29.6398	42.1426	41.838	1.12012	1.1262	3.82373	3.73797	4.84888	4.8346	11.397	11.0781	15.2202	15.0013	27.9426	27.4195	41.1267	40.5467
90.648	1.69995	1.65893	4.9812	4.82825	5.40649	5.37727	12.4573	12.0362	16.3333	16.0122	30.1597	29.6686	42.1892	41.8753	1.11548	1.12797	3.82178	3.74246	4.84839	4.84063	11.408	11.0904	15.2356	15.0188	27.9463	27.4476	41.1621	40.5833
90.748	1.71094	1.66102	4.98853	4.83358	5.41382	5.38384	12.4761	12.0493	16.3484	16.0306	30.1978	29.6974	42.2219	41.9126	1.13257	1.12975	3.83276	3.74694	4.85938	4.84667	11.4274	11.1028	15.2717	15.0363	27.9885	27.4756	41.2	40.62
90.848	1.71301	1.6631	4.99011	4.83891	5.41174	5.39041	12.4955	12.0624	16.3617	16.0491	30.2213	29.7262	42.2567	41.9499	1.1366	1.13152	3.83264	3.75143	4.85535	4.8527	11.4421	11.1151	15.2916	15.0537	28.0157	27.5036	41.2394	40.6566
90.948	1.70801	1.66519	4.99707	4.84424	5.42432	5.39698	12.5066	12.0755	16.3748	16.0675	30.2534	29.7549	42.2949	41.9872	1.12769	1.1333	3.8396	3.75591	4.8623	4.85874	11.4393	11.1274	15.3022	15.0712	28.0344	27.5317	41.2771	40.6932
91.048	1.70715	1.66727	4.99988	4.84957	5.42712	5.40354	12.515	12.0885	16.3812	16.0859	30.2758	29.7837	42.3251	42.0245	1.13049	1.13507	3.83069	3.7604	4.86511	4.86477	11.4625	11.1398	15.3224	15.0887	28.0587	27.5597	41.3195	40.7299
91.148	1.71667	1.66936	5.0155	4.8549	5.44836	5.41011	12.5306	12.1016	16.4164	16.1044	30.3109	29.8125	42.3837	42.0618	1.1344	1.13685	3.85193	3.76488	4.88074	4.8708	11.4646	11.1521	15.35	15.1062	28.0939	27.5877	41.3622	40.7665
91.248	1.70703	1.67145	5.01953	4.86023	5.45093	5.41667	12.5486	12.1147	16.4246	16.1228	30.3442	29.8412	42.4131	42.0991	1.13648	1.13862	3.84839	3.76936	4.8772	4.87683	11.4752	11.1644	15.3638	15.1237	28.1038	27.6157	41.4033	40.803
91.348	1.70618	1.67353	5.02234	4.86555	5.44958	5.42324	12.5472	12.1278	16.4427	16.1412	30.3629	29.87	42.4435	42.1363	1.13147	1.1404	3.84338	3.77385	4.87585	4.88286	11.5005	11.1768	15.3763	15.1412	28.1378	27.6437	41.4318	40.8396
91.448	1.71167	1.67562	5.03394	4.87088	5.4729	5.4298	12.5667	12.1408	16.4543	16.1596	30.3899	29.8988	42.49	42.1736	1.14307	1.14217	3.85864	3.77833	4.88745	4.88888	11.5164	11.1891	15.3997	15.1586	28.1611	27.6717	41.4783	40.8762
91.548	1.71411	1.6777	5.04199	4.87621	5.48096	5.43636	12.5808	12.1539	16.4819	16.178	30.4292	29.9275	42.5293	42.2108	1.15112	1.14394	3.86108	3.78281	4.88989	4.89491	11.5283	11.2014	15.4155	15.1761	28.1887	27.6997	41.5176	40.9127
91.648	1.71021	1.67978	5.04224	4.88153	5.48315	5.44292	12.5942	12.167	16.4958	16.1965	30.4546	29.9562	42.5686	42.248	1.14526	1.14572	3.86475	3.78729	4.8916	4.90093	11.5432	11.2137	15.4331	15.1936	28.2141	27.7277	41.5544	40.9493
91.748	1.71582	1.68187	5.05347	4.88686	5.50024	5.44948	12.6174	12.18	16.5149	16.2149	30.4895	29.985	42.6189	42.2852	1.16064	1.14749	3.88428	3.79177	4.92065	4.90696	11.5596	11.226	15.4429	15.211	28.2373	27.7557	41.615	40.9858
91.848	1.71582	1.68395	5.05395	4.89218	5.50439	5.45604	12.6216	12.1931	16.5386	16.2333	30.5132	30.0137	42.666	42.3224	1.15894	1.14926	3.88843	3.79625	4.9248	4.91298	11.5669	11.2384	15.4583	15.2285	28.2649	27.7837	41.6467	41.0223
91.948	1.71582	1.68603	5.05151	4.89751	5.50439	5.46259	12.6333	12.2062	16.554	16.2517	30.5444	30.0424	42.7031	42.3596	1.15088	1.15103	3.88599	3.80073	4.92285	4.919	11.58	11.2507	15.4758	15.2459	28.29	27.8117	41.6775	41.0588
92.048	1.7113	1.68812	5.07239	4.90283	5.5133	5.46915	12.6481	12.2192	16.5712	16.2701	30.5709	30.0711	42.7511	42.3968	1.15832	1.1528	3.90515	3.8052	4.93176	4.92502	11.5914	11.263	15.5006	15.2634	28.3226	27.8397	41.7179	41.0953
92.148	1.70691	1.6902	5.06848	4.90816	5.51306	5.4757	12.6478	12.2323	16.5765	16.2885	30.598	30.0999	42.7821	42.434	1.15393	1.15458	3.89709	3.80968	4.93152	4.93103	11.6016	11.2753	15.5082	15.2808	28.3419	27.8676	41.7489	41.1318
92.248	1.71289	1.69228	5.07397	4.91348	5.51343	5.48225	12.6675	12.2453	16.6021	16.3069	30.6238	30.1286	42.8098	42.4711	1.1521	1.15635	3.89502	3.81415	4.9375	4.93705	11.6149	11.2876	15.5161	15.2983	28.3557	27.8956	41.7861	41.1683
92.348	1.70325	1.69436	5.08215	4.9188	5.52307	5.4888	12.6793	12.2584	16.6215	16.3253	30.6449	30.1573	42.8563	42.5083	1.14807	1.15812	3.90881	3.81863	4.94519	4.94306	11.6198	11.2999	15.5355	15.3157	28.3868	27.9235	41.8251	41.2047
92.448	1.70398	1.69644	5.09827	4.92412	5.5238	5.49535	12.6898	12.2714	16.6285	16.3437	30.6693	30.186	42.8966	42.5454	1.14929	1.15989	3.91565	3.8231	4.94446	4.94908	11.6327	11.3122	15.5482	15.3332	28.4113	27.9515	41.8573	41.2412
92.548	1.72058	1.69852	5.11536	4.92944	5.54456	5.5019	12.7008	12.2845	16.6527	16.362	30.7074	30.2147	42.9425	42.5825	1.15979	1.16166	3.92444	3.82758	4.96863	4.95509	11.6421	11.3245	15.5765	15.3506	28.4474	27.9794	41.9052	41.2776
92.648	1.72266	1.7006	5.10767	4.93476	5.54053	5.50845	12.7183	12.2975	16.6707	16.3804	30.7407	30.2434	42.9753	42.6196	1.16187	1.16343	3.9148	3.83205	4.97266	4.9611	11.6724	11.3368	15.5847	15.368	28.469	28.0074	41.9385	41.314
92.748	1.73145	1.70268	5.11597	4.94008	5.55298	5.51499	12.7307	12.3106	16.6868	16.3988	30.7671	30.2721	43.0273	42.6567	1.16846	1.1652	3.92725	3.83652	4.98511	4.96711	11.6815	11.3491	15.6008	15.3855	28.501	28.0353	41.9783	41.3505
92.848	1.73816	1.70476	5.13684	4.9454	5.5658	5.52154	12.7552	12.3236	16.7113	16.4172	30.7897	30.3007	43.0695	42.6938	1.17761	1.16696	3.92834	3.84099	4.99792	4.97312	11.6881	11.3614	15.6254	15.4029	28.5275	28.0632	42.0126	41.3868
92.948	1.73132	1.70684	5.13562	4.95072	5.57068	5.52808	12.7643	12.3367	16.7357	16.4356	30.8099	30.3294	43.1014	42.7309	1.16467	1.16873	3.93103	3.84547	4.99915	4.97913	11.6998	11.3737	15.6381	15.4203	28.5519	28.0912	42.0487	41.4232
93.048	1.74304	1.70892	5.14172	4.95603	5.59045	5.53462	12.7816	12.3497	16.7474	16.4539	30.8412	30.3581	43.1486	42.768	1.17078	1.1705	3.9469	3.84994	5.00476	4.98513	11.71	11.386	15.6461	15.4377	28.5831	28.1191	42.0917	41.4596
93.148	1.7373	1.711	5.13403	4.96135	5.58276	5.54116	12.7837	12.3628	16.7634	16.4723	30.8689	30.3868	43.1758	42.805	1.1687	1.17227	3.93726	3.85441	5.00122	4.99114	11.7233	11.3983	15.6538	15.4551	28.6047	28.147	42.1096	41.496
93.248	1.74133	1.71308	5.13757	4.96667	5.58435	5.5477	12.7992	12.3758	16.7787	16.4907	30.892	30.4154	43.2169	42.8421	1.17639	1.17404	3.94275	3.85887	5.00476	4.99714	11.738	11.4106	15.6693	15.4726	28.632	28.1749	42.1425	41.5323
93.348	1.73853	1.71515	5.14087	4.97198	5.59351	5.55424	12.8179	12.3888	16.7898	16.509	30.9185	30.4441	43.2705	42.8791	1.17163	1.1758	3.94409	3.86334	5.01172	5.00314	11.7401	11.4229	15.6899	15.49	28.6584	28.2028	42.1768	41.5687
93.448	1.74011	1.71723	5.14832	4.9773	5.59509	5.56078	12.8278	12.4019	16.8011	16.5274	30.9437	30.4727	43.3116	42.9161	1.17371	1.17757	3.95544	3.86781	5.00012	5.00914	11.7574	11.4351	15.7035	15.5074	28.6759	28.2307	42.2137	41.605
93.548	1.74988	1.71931	5.15808	4.98261	5.6012	5.56731	12.8451	12.4149	16.8304	16.5457	30.9694	30.5014	43.3466	42.9531	1.16956	1.17934	3.96936	3.87228	5.00574	5.01514	11.7692	11.4474	15.725	15.5248	28.7072	28.2586	42.2548	41.6413
93.648	1.74817	1.72139	5.15833	4.98792	5.60706	5.57385	12.849	12.4279	16.8307	16.5641	30.9923	30.53	43.3839	42.9901	1.17346	1.1811	3.96545	3.87674	5.00598	5.02114	11.7916	11.4597	15.7289	15.5422	28.7306	28.2865	42.288	41.6776
93.748	1.75476	1.72346	5.16296	4.99324	5.61365	5.58038	12.8737	12.441	16.8512	16.5824	31.0348	30.5586	43.4218	43.0271	1.1842	1.18287	3.98181	3.88121	5.02234	5.02713	11.7947	11.472	15.7592	15.5596	28.7609	28.3143	42.3356	41.7139
93.848	1.74243	1.72554	5.16602	4.99855	5.6167	5.58691	12.8726	12.454	16.8599	16.6008	31.0532	30.5873	43.4485	43.0641	1.17554	1.18463	3.97925	3.88567	5.02539	5.03313	11.8025	11.4843	15.7585	15.577	28.8008	28.3422	42.3623	41.7502
93.948	1.74414	1.72761	5.18188	5.00386	5.6189	5.59344	12.8921	12.467	16.8755	16.6191	31.0806	30.6159	43.4814	43.1011	1.1853	1.1864	3.99268	3.89014	5.03516	5.03912	11.819	11.4965	15.7798	15.5943	28.8323	28.3701	42.4014	41.7865
94.048	1.75281	1.72969	5.17468	5.00917	5.62561	5.59997	12.903	12.48	16.8922	16.6375	31.1205	30.6445	43.5292	43.138	1.18616	1.18816	3.99011	3.8946	5.0321	5.04512	11.8241	11.5088	15.7885	15.6117	28.8549	28.3979	42.4337	41.8227
94.148	1.75207	1.73176	5.19348	5.01448	5.62659	5.6065	12.9213	12.4931	16.9066	16.6558	31.1471	30.6731	43.5675	43.175	1.19128	1.18993	4.00037	3.89906	5.03723	5.05111	11.8337	11.5211	15.8129	15.6291	28.881	28.4258	42.4659	41.859
94.248	1.74805	1.73384	5.18945	5.01979	5.62451	5.61302	12.9275	12.5061	16.9204	16.6742	31.1743	30.7017	43.6025	43.2119	1.17749	1.19169	3.99878	3.90352	5.03516	5.0571	11.8442	11.5334	15.8228	15.6465	28.9026	28.4537	42.4871	41.8952
94.348	1.75855	1.73591	5.20215	5.0251	5.64673	5.61955	12.9399	12.5191	16.9504	16.6925	31.1987	30.7304	43.6443	43.2488	1.18799	1.19346	3.99756	3.90798	5.04565	5.06308	11.8689	11.5456	15.845	15.6639	28.9326	28.4815	42.533	41.9314
94.448	1.76782	1.73799	5.20532	5.03041	5.65405	5.62607	12.9546	12.5321	16.9751	16.7108	31.2271	30.759	43.6926	43.2857	1.1875	1.19522	4.01245	3.91244	5.07031	5.06907	11.8817	11.5579	15.8579	15.6812	28.9709	28.5093	42.585	41.9676
94.548	1.77234	1.74006	5.20984	5.03572	5.65295	5.6326	12.9694	12.5452	16.9916	16.7291	31.2633	30.7875	43.7228	43.3226	1.19202	1.19698	4.01331	3.9169	5.07532	5.07506	11.8824	11.5702	15.8744	15.6986	29.007	28.5372	42.6212	42.0038
94.648	1.77356	1.74213	5.21106	5.04102	5.64807	5.63912	12.9701	12.5582	16.9928	16.7475	31.2816	30.8161	43.7548	43.3595	1.18152	1.19874	4.01819	3.92136	5.0741	5.08104	11.9021	11.5824	15.8873	15.716	29.0272	28.565	42.653	42.04
94.748	1.77539	1.74421	5.21289	5.04633	5.66357	5.64564	12.9861	12.5712	17.0063	16.7658	31.3091	30.8447	43.8018	43.3964	1.18897	1.20051	4.0144	3.92582	5.08203	5.08702	11.9061	11.5947	15.9065	15.7333	29.0552	28.5928	42.6926	42.0762
94.848	1.77942	1.74628	5.22253	5.05164	5.66956	5.65216	12.9896	12.5842	17.0355	16.7841	31.3519	30.8733	43.8448	43.4332	1.20276	1.20227	4.02405	3.93028	5.09167	5.09301	11.9147	11.6069	15.9244	15.7507	29.0802	28.6206	42.7408	42.1123
94.948	1.78015	1.74835	5.22375	5.05694	5.66833	5.65868	13.0023	12.5972	17.0446	16.8024	31.3842	30.9019	43.8768	43.4701	1.20764	1.20403	4.03455	3.93473	5.09094	5.09899	11.9167	11.6192	15.9232	15.768	29.1219	28.6485	42.7831	42.1485
95.048	1.77856	1.75042	5.22778	5.06225	5.66479	5.66519	13.0181	12.6102	17.0522	16.8207	31.4058	30.9305	43.9026	43.5069	1.19824	1.20579	4.03296	3.93919	5.08887	5.10497	11.9354	11.6314	15.937	15.7854	29.144	28.6763	42.8164	42.1846
95.148	1.77331	1.75249	5.23425	5.06755	5.67322	5.67171	13.0385	12.6232	17.0765	16.839	31.4379	30.959	43.9403	43.5437	1.19495	1.20755	4.03381	3.94365	5.11121	5.11094	11.9305	11.6437	15.9594	15.8027	29.1757	28.7041	42.8563	42.2208
95.248	1.77258	1.75456	5.23914	5.07285	5.67444	5.67822	13.0494	12.6362	17.0912	16.8574	31.4662	30.9876	43.9843	43.5806	1.19983	1.20931	4.04065	3.9481	5.11609	5.11692	11.9401	11.6559	15.976	15.8201	29.2062	28.7319	42.9042	42.2569
95.348	1.77429	1.75663	5.24133	5.07816	5.68762	5.68474	13.059	12.6492	17.1051	16.8757	31.4957	31.0161	44.0294	43.6174	1.20007	1.21107	4.04651	3.95255	5.11414	5.1229	11.9589	11.6682	15.9896	15.8374	29.2316	28.7597	42.9374	42.293
95.448	1.78137	1.7587	5.24792	5.08346	5.69885	5.69125	13.0814	12.6622	17.1176	16.894	31.5199	31.0447	44.0614	43.6542	1.19495	1.21283	4.0531	3.95701	5.12903	5.12887	11.9662	11.6804	16.0121	15.8548	29.2618	28.7874	42.9813	42.3291
95.548	1.78308	1.76077	5.25989	5.08876	5.6969	5.69776	13.0914	12.6752	17.1371	16.9123	31.559	31.0732	44.0948	43.6909	1.20276	1.21459	4.06702	3.96146	5.13074	5.13484	11.9786	11.6927	16.0143	15.8721	29.2777	28.8152	43.0282	42.3651
95.648	1.78723	1.76284	5.25012	5.09406	5.6969	5.70427	13.1031	12.6882	17.1454	16.9305	31.5907	31.1018	44.1261	43.7277	1.20691	1.21635	4.05945	3.96591	5.12708	5.14081	11.9927	11.7049	16.0204	15.8894	29.2916	28.843	43.0636	42.4012
95.748	1.79199	1.76491	5.26074	5.09936	5.71704	5.71077	13.1196	12.7012	17.1594	16.9488	31.6089	31.1303	44.1699	43.7645	1.20386	1.21811	4.06787	3.97036	5.14331	5.14678	12.0006	11.7172	16.0325	15.9068	29.3308	28.8708	43.1033	42.4373
95.848	1.79382	1.76698	5.25891	5.10466	5.72498	5.71728	13.1293	12.7142	17.1869	16.9671	31.6359	31.1588	44.201	43.8012	1.20569	1.21987	4.07581	3.97481	5.14563	5.15275	12.0203	11.7294	16.0404	15.9241	29.3624	28.8985	43.1385	42.4733
95.948	1.79199	1.76905	5.26074	5.10996	5.72729	5.72379	13.1353	12.7272	17.2009	16.9854	31.6792	31.1874	44.2383	43.838	1.21167	1.22163	4.08179	3.97926	5.14746	5.15872	12.0348	11.7416	16.0581	15.9414	29.3879	28.9263	43.1758	42.5093
96.048	1.79504	1.77112	5.27917	5.11526	5.73572	5.73029	13.15	12.7402	17.2094	17.0037	31.7054	31.2159	44.2784	43.8747	1.21472	1.22338	4.07312	3.98371	5.15613	5.16469	12.0399	11.7539	16.0726	15.9587	29.4161	28.954	43.2216	42.5454
96.148	1.80164	1.77319	5.2843	5.12056	5.74646	5.73679	13.1644	12.7532	17.2318	17.022	31.7435	31.2444	44.3163	43.9114	1.20959	1.22514	4.08337	3.98816	5.1554	5.17065	12.0505	11.7661	16.0834	15.976	29.4464	28.9818	43.2655	42.5814
96.248	1.80469	1.77525	5.2832	5.12585	5.74585	5.74329	13.1792	12.7662	17.239	17.0402	31.7664	31.2729	44.3584	43.9481	1.21265	1.2269	4.0791	3.99261	5.16016	5.17661	12.0652	11.7783	16.1001	15.9933	29.4634	29.0095	43.3076	42.6173
96.348	1.79785	1.77732	5.29004	5.13115	5.7583	5.74979	13.1841	12.7792	17.2515	17.0585	31.7981	31.3014	44.3945	43.9848	1.21753	1.22866	4.08545	3.99705	5.17065	5.18257	12.0762	11.7906	16.1106	16.0106	29.5046	29.0373	43.3572	42.6533
96.448	1.80273	1.77939	5.29297	5.13645	5.75757	5.75629	13.1968	12.7921	17.2759	17.0768	31.8188	31.3299	44.4385	44.0215	1.2146	1.23041	4.1001	4.0015	5.17969	5.18854	12.0758	11.8028	16.1218	16.028	29.522	29.065	43.3975	42.6893
96.548	1.80847	1.78145	5.29309	5.14174	5.75354	5.76279	13.2142	12.8051	17.2897	17.0951	31.8522	31.3584	44.4718	44.0581	1.22034	1.23217	4.09827	4.00594	5.17981	5.1945	12.0885	11.815	16.1351	16.0453	29.547	29.0927	43.4288	42.7253
96.648	1.80774	1.78352	5.29382	5.14704	5.75232	5.76929	13.2252	12.8181	17.2963	17.1133	31.8705	31.3869	44.5096	44.0948	1.20789	1.23392	4.09534	4.01039	5.18054	5.20045	12.1051	11.8272	16.1478	16.0625	29.5792	29.1204	43.4569	42.7612
96.748	1.81238	1.78558	5.31457	5.15233	5.76331	5.77578	13.2399	12.8311	17.3268	17.1316	31.9066	31.4154	44.5519	44.1314	1.22034	1.23568	4.11389	4.01483	5.18933	5.20641	12.1246	11.8395	16.1761	16.0798	29.6075	29.1482	43.5048	42.7971
96.848	1.82019	1.78765	5.31262	5.15762	5.76697	5.78228	13.2552	12.8441	17.3422	17.1498	31.9303	31.4439	44.5868	44.1681	1.22449	1.23743	4.10999	4.01928	5.19714	5.21237	12.1451	11.8517	16.192	16.0971	29.6405	29.1759	43.5438	42.833
96.948	1.83093	1.78971	5.31726	5.16292	5.78748	5.78877	13.2738	12.857	17.3724	17.1681	31.9564	31.4723	44.6329	44.2047	1.22131	1.23919	4.12439	4.02372	5.21204	5.21832	12.1638	11.8639	16.2045	16.1144	29.6713	29.2036	43.5819	42.869
97.048	1.83423	1.79178	5.33594	5.16821	5.79443	5.79526	13.2869	12.87	17.3933	17.1863	31.9829	31.5008	44.6611	44.2413	1.21655	1.24094	4.13745	4.02816	5.21851	5.22427	12.1667	11.8761	16.2231	16.1317	29.6973	29.2313	43.6201	42.9049
97.148	1.82495	1.79384	5.34082	5.1735	5.79736	5.80175	13.2935	12.883	17.4094	17.2046	32.0171	31.5293	44.7009	44.2779	1.2251	1.2427	4.13818	4.0326	5.22754	5.23022	12.1871	11.8883	16.2336	16.149	29.7314	29.259	43.6445	42.9407
97.248	1.83777	1.79591	5.35559	5.17879	5.80603	5.80824	13.3138	12.896	17.4264	17.2228	32.0453	31.5577	44.7413	44.3145	1.23791	1.24445	4.151	4.03704	5.23621	5.23617	12.2029	11.9005	16.2543	16.1663	29.7638	29.2866	43.6844	42.9766
97.348	1.84204	1.79797	5.35938	5.18408	5.82568	5.81473	13.3259	12.9089	17.4399	17.2411	32.0728	31.5862	44.7842	44.351	1.23608	1.2462	4.15894	4.04148	5.23633	5.24212	12.2047	11.9128	16.2739	16.1835	29.803	29.3143	43.7236	43.0125
97.448	1.84534	1.80003	5.36316	5.18937	5.83313	5.82121	13.3446	12.9219	17.4552	17.2593	32.0941	31.6146	44.8229	44.3876	1.24353	1.24796	4.15466	4.04592	5.23816	5.24807	12.2216	11.925	16.2814	16.2008	29.8263	29.342	43.7584	43.0483
97.548	1.85095	1.8021	5.37415	5.19466	5.83875	5.8277	13.3544	12.9349	17.4725	17.2776	32.1249	31.6431	44.8461	44.4242	1.245	1.24971	4.16174	4.05036	5.24695	5.25402	12.239	11.9372	16.3102	16.2181	29.849	29.3697	43.799	43.0841
97.648	1.85815	1.80416	5.38745	5.19995	5.84595	5.83418	13.3752	12.9478	17.4993	17.2958	32.1536	31.6715	44.8865	44.4607	1.2583	1.25146	4.17554	4.05479	5.26074	5.25996	12.2513	11.9494	16.3235	16.2353	29.8818	29.3973	43.8379	43.12
97.748	1.87097	1.80622	5.39661	5.20523	5.85876	5.84066	13.3922	12.9608	17.5199	17.314	32.1976	31.6999	44.9266	44.4972	1.27112	1.25321	4.17249	4.05923	5.26941	5.2659	12.2723	11.9616	16.3558	16.2526	29.9259	29.425	43.8661	43.1558
97.848	1.86438	1.80828	5.39563	5.21052	5.86389	5.84715	13.4066	12.9737	17.5424	17.3323	32.226	31.7284	44.9689	44.5337	1.26453	1.25497	4.18127	4.06367	5.27454	5.27185	12.2665	11.9738	16.3646	16.2698	29.9542	29.4526	43.9022	43.1916
97.948	1.85486	1.81034	5.38977	5.21581	5.86609	5.85363	13.4091	12.9867	17.5621	17.3505	32.2499	31.7568	44.9884	44.5702	1.25647	1.25672	4.1698	4.0681	5.26868	5.27779	12.2856	11.986	16.3766	16.2871	29.9703	29.4803	43.9337	43.2274
98.048	1.86011	1.8124	5.40112	5.22109	5.87134	5.8601	13.4163	12.9997	17.593	17.3687	32.2786	31.7852	45.0388	44.6067	1.26831	1.25847	4.17334	4.07254	5.26831	5.28373	12.2998	11.9982	16.3977	16.3043	30.0088	29.5079	43.9763	43.2631
98.148	1.86621	1.81446	5.40723	5.22638	5.87744	5.86658	13.4341	13.0126	17.6072	17.3869	32.3064	31.8136	45.084	44.6432	1.26831	1.26022	4.17944	4.07697	5.27441	5.28966	12.3074	12.0104	16.4038	16.3216	30.0344	29.5356	44.002	43.2989
98.248	1.86255	1.81652	5.40161	5.23166	5.8794	5.87306	13.4363	13.0256	17.6089	17.4051	32.3335	31.842	45.1116	44.6797	1.25098	1.26197	4.17944	4.0814	5.27441	5.2956	12.3317	12.0226	16.4099	16.3388	30.054	29.5632	44.0178	43.3346
98.348	1.86926	1.81858	5.42004	5.23695	5.89587	5.87953	13.4603	13.0385	17.6371	17.4234	32.3715	31.8704	45.1666	44.7161	1.26331	1.26372	4.1842	4.08584	5.29285	5.30154	12.3281	12.0347	16.4337	16.3561	30.0956	29.5908	44.0651	43.3704
98.448	1.85742	1.82064	5.41797	5.24223	5.89233	5.88601	13.4587	13.0515	17.655	17.4416	32.3931	31.8988	45.2083	44.7526	1.271	1.26547	4.19189	4.09027	5.29492	5.30747	12.3424	12.0469	16.4536	16.3733	30.1294	29.6184	44.1067	43.4061
98.548	1.86414	1.8227	5.42102	5.24751	5.90271	5.89248	13.4672	13.0644	17.6674	17.4598	32.4137	31.9272	45.2421	44.789	1.276	1.26722	4.1991	4.0947	5.29602	5.3134	12.3649	12.0591	16.4681	16.3905	30.1552	29.646	44.1288	43.4418
98.648	1.87512	1.82476	5.42956	5.2528	5.9137	5.89895	13.4935	13.0774	17.6898	17.478	32.4437	31.9556	45.2958	44.8254	1.28699	1.26897	4.20544	4.09913	5.2948	5.31934	12.3669	12.0713	16.4945	16.4078	30.1898	29.6737	44.1593	43.4775
98.748	1.87305	1.82682	5.43384	5.25808	5.90967	5.90542	13.5037	13.0903	17.7036	17.4962	32.4656	31.984	45.3235	44.8618	1.27124	1.27072	4.2019	4.10356	5.29688	5.32527	12.3873	12.0835	16.5022	16.425	30.2073	29.7013	44.1865	43.5132
98.848	1.88171	1.82888	5.43835	5.26336	5.91833	5.91189	13.5062	13.1033	17.7201	17.5144	32.4877	32.0124	45.3671	44.8982	1.27991	1.27246	4.21057	4.10799	5.30554	5.33119	12.3961	12.0957	16.5231	16.4422	30.2472	29.7289	44.2264	43.5489
98.948	1.88489	1.83094	5.44348	5.26864	5.92346	5.91836	13.5172	13.1162	17.7369	17.5326	32.5182	32.0407	45.4113	44.9346	1.28088	1.27421	4.21155	4.11242	5.31433	5.33712	12.4196	12.1078	16.5392	16.4594	30.2677	29.7564	44.2682	43.5845
99.048	1.89636	1.83299	5.45496	5.27392	5.93298	5.92482	13.5404	13.1291	17.7679	17.5508	32.5492	32.0691	45.452	44.971	1.29651	1.27596	4.21741	4.11684	5.32996	5.34305	12.4401	12.12	16.5609	16.4766	30.2992	29.784	44.3156	43.6202
99.148	1.90149	1.83505	5.46375	5.2792	5.94177	5.93129	13.5533	13.1421	17.7885	17.5689	32.5856	32.0975	45.4999	45.0074	1.29553	1.27771	4.2262	4.12127	5.33508	5.34897	12.453	12.1322	16.587	16.4939	30.3331	29.8116	44.3397	43.6558
99.248	1.90417	1.83711	5.46692	5.28447	5.95056	5.93775	13.5697	13.155	17.7994	17.5871	32.6041	32.1258	45.5399	45.0437	1.30432	1.27945	4.22327	4.1257	5.35144	5.3549	12.4713	12.1444	16.6041	16.5111	30.3615	29.8392	44.3876	43.6915
99.348	1.9032	1.83916	5.4679	5.28975	5.9613	5.94421	13.5804	13.1679	17.8177	17.6053	32.64	32.1542	45.5897	45.0801	1.29773	1.2812	4.23401	4.13012	5.36218	5.36082	12.4891	12.1565	16.6261	16.5283	30.3917	29.8667	44.424	43.7271
99.448	1.90564	1.84122	5.48157	5.29503	5.96375	5.95067	13.5887	13.1809	17.828	17.6235	32.6656	32.1825	45.6312	45.1164	1.29968	1.28295	4.2323	4.13455	5.35657	5.36674	12.4968	12.1687	16.6461	16.5455	30.4117	29.8943	44.4608	43.7627
99.548	1.90503	1.84327	5.48706	5.30031	5.96509	5.95713	13.6018	13.1938	17.8354	17.6417	32.6987	32.2109	45.6582	45.1527	1.2937	1.28469	4.23779	4.13897	5.36206	5.37266	12.5182	12.1809	16.6633	16.5627	30.4209	29.9219	44.5059	43.7983
99.648	1.91321	1.84533	5.49524	5.30558	5.9906	5.96359	13.6237	13.2067	17.851	17.6598	32.726	32.2392	45.7106	45.189	1.30139	1.28644	4.23987	4.14339	5.37024	5.37858	12.5348	12.193	16.6886	16.5799	30.4581	29.9494	44.535	43.8338
99.748	1.91785	1.84738	5.49988	5.31086	5.99377	5.97005	13.6305	13.2197	17.8715	17.678	32.766	32.2675	45.7628	45.2253	1.29846	1.28818	4.25427	4.14782	5.37488	5.3845	12.5408	12.2052	16.7096	16.5971	30.4865	29.977	44.5751	43.8694
99.848	1.91235	1.84944	5.5022	5.31613	5.99561	5.9765	13.6421	13.2326	17.8933	17.6962	32.8013	32.2958	45.8037	45.2616	1.30444	1.28993	4.26074	4.15224	5.38086	5.39041	12.5602	12.2174	16.7114	16.6142	30.5139	30.0045	44.6084	43.9049
99.948	1.91394	1.85149	5.50378	5.32141	6.0033	5.98296	13.6576	13.2455	17.9066	17.7143	32.8365	32.3242	45.8505	45.2978	1.30432	1.29167	4.26013	4.15666	5.38855	5.39633	12.5669	12.2295	16.7365	16.6314	30.5411	30.032	44.6437	43.9405
100.048	1.91504	1.85355	5.5105	5.32668	6.01001	5.98941	13.6606	13.2584	17.9211	17.7325	32.845	32.3525	45.8962	45.3341	1.31104	1.29342	4.27295	4.16108	5.39526	5.40224	12.6012	12.2417	16.7551	16.6486	30.5618	30.0596	44.6755	43.976
100.148	1.92371	1.8556	5.52747	5.33195	6.01917	5.99586	13.6754	13.2714	17.9476	17.7507	32.8834	32.3808	45.9366	45.3703	1.31824	1.29516	4.28577	4.1655	5.40808	5.40815	12.6101	12.2538	16.7853	16.6658	30.59	30.0871	44.7079	44.0115
100.248	1.91724	1.85765	5.53223	5.33722	6.02197	6.00231	13.686	13.2843	17.9644	17.7688	32.9077	32.4091	45.9707	45.4066	1.323	1.2969	4.29468	4.16992	5.41333	5.41406	12.6261	12.266	16.8081	16.683	30.6147	30.1146	44.75	44.047
100.348	1.91516	1.85971	5.53064	5.34249	6.02405	6.00876	13.6942	13.2972	17.9781	17.787	32.9257	32.4374	46.0062	45.4428	1.31531	1.29865	4.28503	4.17434	5.41125	5.41997	12.6235	12.2781	16.8163	16.7001	30.6302	30.1421	44.7794	44.0825
100.448	1.91675	1.86176	5.52612	5.34777	6.02197	6.01521	13.6917	13.3101	17.9839	17.8051	32.9407	32.4657	46.0349	45.479	1.31689	1.30039	4.28662	4.17876	5.41284	5.42588	12.6493	12.2903	16.8137	16.7173	30.6436	30.1696	44.8123	44.118
100.548	1.92517	1.86381	5.53454	5.35303	6.03186	6.02166	13.7098	13.323	18.0035	17.8233	32.9725	32.494	46.0726	45.5152	1.33093	1.30213	4.30066	4.18317	5.41345	5.43178	12.6523	12.3024	16.8356	16.7345	30.6735	30.1971	44.8575	44.1534
100.648	1.92187	1.86586	5.53125	5.3583	6.03271	6.0281	13.7126	13.3359	18.0239	17.8414	32.9888	32.5223	46.1182	45.5514	1.33179	1.30387	4.2937	4.18759	5.41016	5.43769	12.6617	12.3146	16.8481	16.7516	30.6855	30.2246	44.8857	44.1889
100.748	1.92371	1.86791	5.53308	5.36357	6.02893	6.03455	13.722	13.3488	18.0338	17.8595	33.0179	32.5505	46.1512	45.5876	1.32019	1.30562	4.30115	4.192	5.41199	5.44359	12.6805	12.3267	16.85	16.7688	30.7111	30.2521	44.9188	44.2243
100.848	1.93274	1.86996	5.54773	5.36884	6.03381	6.04099	13.7445	13.3618	18.0502	17.8777	33.056	32.5788	46.1896	45.6237	1.31897	1.30736	4.31018	4.19642	5.42664	5.44949	12.6738	12.3389	16.8842	16.7859	30.7452	30.2796	44.9647	44.2597
100.948	1.92602	1.87201	5.55884	5.37411	6.04053	6.04743	13.7476	13.3747	18.0649	17.8958	33.075	32.6071	46.2314	45.6599	1.32202	1.3091	4.31323	4.20083	5.43384	5.4554	12.6797	12.351	16.8872	16.8031	30.7581	30.3071	44.9873	44.2952
101.048	1.91797	1.87406	5.55664	5.37938	6.04077	6.05387	13.7673	13.3876	18.0688	17.9139	33.0942	32.6353	46.2708	45.696	1.32959	1.31084	4.3208	4.20525	5.43164	5.4613	12.6899	12.3631	16.9028	16.8202	30.7854	30.3345	45.0129	44.3306
101.148	1.93066	1.87611	5.573	5.38464	6.05103	6.06031	13.7776	13.4005	18.1047	17.9321	33.1301	32.6636	46.3201	45.7321	1.34644	1.31258	4.33545	4.20966	5.44019	5.46719	12.6924	12.3753	16.929	16.8374	30.8157	30.362	45.0564	44.3659
101.248	1.91724	1.87816	5.56934	5.38991	6.06519	6.06675	13.7974	13.4134	18.1091	17.9502	33.1638	32.6918	46.3538	45.7682	1.34253	1.31432	4.3374	4.21407	5.44824	5.47309	12.7095	12.3874	16.937	16.8545	30.8274	30.3895	45.0977	44.4013
101.348	1.92456	1.88021	5.58276	5.39517	6.07446	6.07319	13.8071	13.4263	18.1262	17.9683	33.1926	32.7201	46.4021	45.8043	1.35791	1.31606	4.35132	4.21848	5.46167	5.47899	12.7273	12.3995	16.97	16.8716	30.8721	30.4169	45.1501	44.4367
101.448	1.93066	1.88226	5.58521	5.40044	6.0769	6.07962	13.8149	13.4392	18.144	17.9864	33.2261	32.7483	46.4395	45.8404	1.35229	1.3178	4.34521	4.22289	5.46411	5.48488	12.7275	12.4117	16.9878	16.8888	30.8977	30.4444	45.1875	44.472
101.548	1.93286	1.88431	5.58691	5.4057	6.073	6.08606	13.8325	13.4521	18.1616	18.0046	33.2576	32.7766	46.467	45.8765	1.35815	1.31954	4.35156	4.2273	5.46948	5.49077	12.7467	12.4238	16.9937	16.9059	30.9194	30.4718	45.2207	44.5074
101.648	1.93835	1.88636	5.59485	5.41096	6.07849	6.09249	13.8483	13.465	18.1774	18.0227	33.2789	32.8048	46.5175	45.9126	1.36975	1.32128	4.3512	4.23171	5.48157	5.49667	12.7539	12.4359	17.0094	16.923	30.9445	30.4992	45.2635	44.5427
101.748	1.92969	1.8884	5.58398	5.41623	6.08154	6.09892	13.8569	13.4779	18.1902	18.0408	33.3091	32.833	46.5559	45.9486	1.35547	1.32302	4.35986	4.23612	5.48047	5.50256	12.7527	12.448	17.0144	16.9401	30.967	30.5267	45.2942	44.578
101.848	1.92895	1.89045	5.58691	5.42149	6.08447	6.10535	13.8599	13.4907	18.1987	18.0589	33.3279	32.8612	46.5723	45.9847	1.35425	1.32475	4.36694	4.24053	5.47974	5.50845	12.7626	12.4602	17.0286	16.9573	30.978	30.5541	45.3105	44.6133
101.948	1.92664	1.8925	5.58875	5.42675	6.08069	6.11178	13.8698	13.5036	18.2084	18.077	33.3431	32.8895	46.6132	46.0207	1.34827	1.32649	4.35706	4.24493	5.47546	5.51433	12.7791	12.4723	17.0443	16.9744	30.9896	30.5815	45.3436	44.6486
102.048	1.93774	1.89455	5.5979	5.43201	6.09131	6.11821	13.8918	13.5165	18.2312	18.0951	33.3774	32.9177	46.6555	46.0567	1.35742	1.32823	4.37744	4.24934	5.49023	5.52022	12.7753	12.4844	17.0591	16.9915	31.0315	30.6089	45.3799	44.6839
102.148	1.92566	1.89659	5.59558	5.43727	6.08948	6.12464	13.9059	13.5294	18.2347	18.1132	33.4069	32.9459	46.6903	46.0927	1.3551	1.32997	4.37976	4.25374	5.49207	5.5261	12.781	12.4965	17.0763	17.0086	31.0529	30.6363	45.4012	44.7191
102.248	1.92993	1.89864	5.61328	5.44253	6.09521	6.13106	13.906	13.5423	18.2563	18.1313	33.4302	32.9741	46.7314	46.1287	1.35522	1.3317	4.38135	4.25815	5.49634	5.53199	12.7974	12.5086	17.0945	17.0257	31.0767	30.6637	45.4502	44.7544
102.348	1.93042	1.90068	5.61792	5.44779	6.104	6.13749	13.918	13.5552	18.2727	18.1494	33.4604	33.0023	46.7715	46.1647	1.35986	1.33344	4.39209	4.26255	5.49683	5.53787	12.8025	12.5207	17.1067	17.0428	31.0889	30.6911	45.4939	44.7896
102.448	1.93189	1.90273	5.61938	5.45305	6.10303	6.14391	13.9409	13.5681	18.28	18.1674	33.481	33.0305	46.8115	46.2007	1.35938	1.33517	4.3855	4.26696	5.50391	5.54375	12.8184	12.5328	17.1118	17.0599	31.1135	30.7185	45.5186	44.8248
102.548	1.9375	1.90477	5.62134	5.4583	6.12085	6.15033	13.9568	13.5809	18.3071	18.1855	33.5142	33.0586	46.8545	46.2366	1.36694	1.33691	4.39722	4.27136	5.51196	5.54963	12.8258	12.545	17.1313	17.077	31.1448	30.7459	45.5696	44.86
102.648	1.93372	1.90682	5.62268	5.46356	6.11292	6.15675	13.9642	13.5938	18.3109	18.2036	33.5436	33.0868	46.882	46.2726	1.3573	1.33865	4.39905	4.27576	5.50769	5.55551	12.8346	12.5571	17.1449	17.0941	31.1625	30.7733	45.5927	44.8952
102.748	1.92664	1.90886	5.63196	5.46882	6.11755	6.16317	13.9791	13.6067	18.3314	18.2217	33.5658	33.115	46.9139	46.3085	1.35999	1.34038	4.40002	4.28016	5.51648	5.56139	12.8563	12.5692	17.1615	17.1112	31.1903	30.8007	45.6327	44.9304
102.848	1.94421	1.91091	5.63977	5.47407	6.13147	6.16959	14.0004	13.6196	18.3629	18.2398	33.6029	33.1432	46.951	46.3444	1.36023	1.34211	4.4115	4.28456	5.54187	5.56726	12.864	12.5813	17.1871	17.1282	31.2396	30.828	45.6893	44.9656
102.948	1.94629	1.91295	5.64941	5.47933	6.13525	6.176	13.9988	13.6324	18.3726	18.2578	33.6326	33.1713	46.9961	46.3803	1.35815	1.34385	4.41406	4.28896	5.54395	5.57314	12.8735	12.5934	17.1912	17.1453	31.2607	30.8554	45.7109	45.0008
103.048	1.95215	1.91499	5.65894	5.48458	6.14478	6.18242	14.0217	13.6453	18.3862	18.2759	33.6633	33.1995	47.0293	46.4162	1.36401	1.34558	4.41943	4.29336	5.5498	5.57901	12.8962	12.6055	17.208	17.1624	31.2903	30.8828	45.7537	45.0359
103.148	1.94922	1.91703	5.65625	5.48983	6.16186	6.18883	14.0251	13.6582	18.4087	18.294	33.6863	33.2276	47.0635	46.4521	1.35913	1.34732	4.42627	4.29776	5.55273	5.58488	12.9041	12.6176	17.2175	17.1795	31.3147	30.9101	45.8018	45.071
103.248	1.94922	1.91908	5.65259	5.49509	6.1521	6.19524	14.0271	13.671	18.4204	18.312	33.7134	33.2558	47.0947	46.488	1.35352	1.34905	4.41504	4.30216	5.55273	5.59075	12.9003	12.6297	17.2329	17.1965	31.3342	30.9374	45.8367	45.1062
103.348	1.94544	1.92112	5.64465	5.50034	6.14783	6.20166	14.0326	13.6839	18.4264	18.3301	33.7233	33.2839	47.1376	46.5238	1.33948	1.35078	4.41077	4.30655	5.55457	5.59662	12.9169	12.6417	17.2347	17.2136	31.3422	30.9648	45.8585	45.1413
103.448	1.95959	1.92316	5.6532	5.50559	6.15686	6.20807	14.0609	13.6968	18.443	18.3482	33.7555	33.312	47.1681	46.5597	1.35046	1.35252	4.42542	4.31095	5.56921	5.60249	12.9186	12.6538	17.2611	17.2307	31.38	30.9921	45.9003	45.1764
103.548	1.96594	1.9252	5.65906	5.51084	6.15857	6.21447	14.0668	13.7096	18.4506	18.3662	33.7865	33.3402	47.2069	46.5955	1.35022	1.35425	4.43689	4.31534	5.57141	5.60836	12.9307	12.6659	17.2711	17.2477	31.4093	31.0194	45.9452	45.2114
103.648	1.96973	1.92724	5.66333	5.51609	6.17456	6.22088	14.0769	13.7225	18.4763	18.3843	33.814	33.3683	47.2461	46.6313	1.35254	1.35598	4.45093	4.31974	5.5752	5.61422	12.9303	12.678	17.2847	17.2648	31.4312	31.0468	45.9788	45.2465
103.748	1.96008	1.92928	5.67468	5.52134	6.17981	6.22729	14.0902	13.7353	18.4857	18.4023	33.8356	33.3964	47.2872	46.6671	1.35413	1.35771	4.45667	4.32413	5.58093	5.62009	12.951	12.6901	17.2982	17.2818	31.4601	31.0741	45.9999	45.2816
103.848	1.96497	1.93132	5.68933	5.52659	6.20276	6.23369	14.1129	13.7482	18.5219	18.4203	33.8636	33.4245	47.327	46.7029	1.36511	1.35944	4.45959	4.32853	5.58997	5.62595	12.9536	12.7022	17.3246	17.2989	31.4943	31.1014	46.0419	45.3166
103.948	1.96558	1.93336	5.698	5.53184	6.19971	6.2401	14.1177	13.761	18.5366	18.4384	33.9016	33.4526	47.3533	46.7387	1.35596	1.36117	4.46265	4.33292	5.59619	5.63181	12.9668	12.7143	17.343	17.3159	31.5322	31.1287	46.0798	45.3516
104.048	1.97461	1.9354	5.70337	5.53709	6.20459	6.2465	14.1323	13.7739	18.5474	18.4564	33.9265	33.4807	47.3899	46.7745	1.36499	1.3629	4.46558	4.33731	5.60571	5.63767	12.9742	12.7263	17.3618	17.333	31.5608	31.156	46.1257	45.3867
104.148	1.97278	1.93744	5.6991	5.54234	6.20642	6.2529	14.142	13.7868	18.5609	18.4745	33.9591	33.5088	47.4052	46.8102	1.36121	1.36463	4.45959	4.3417	5.60339	5.64353	12.9822	12.7384	17.3754	17.35	31.5822	31.1833	46.1593	45.4217
104.248	1.97461	1.93948	5.70703	5.54758	6.22046	6.2593	14.158	13.7996	18.5884	18.4925	33.9871	33.5369	47.4521	46.846	1.35718	1.36636	4.46753	4.34609	5.60767	5.64939	13.0024	12.7505	17.3911	17.367	31.6155	31.2106	46.1904	45.4567
104.348	1.98511	1.94152	5.71753	5.55283	6.22681	6.2657	14.1665	13.8124	18.6128	18.5105	34.0129	33.565	47.4902	46.8817	1.36401	1.36809	4.47803	4.35048	5.61206	5.65524	13.0076	12.7626	17.3979	17.3841	31.6455	31.2379	46.2322	45.4916
104.448	1.98657	1.94356	5.71704	5.55807	6.22827	6.2721	14.1772	13.8253	18.6255	18.5285	34.0339	33.5931	47.5283	46.9174	1.36304	1.36982	4.47949	4.35487	5.61719	5.6611	13.0048	12.7746	17.4087	17.4011	31.6646	31.2651	46.2568	45.5266
104.548	1.97961	1.94559	5.7157	5.56332	6.22498	6.27849	14.1879	13.8381	18.6324	18.5466	34.0558	33.6212	47.5624	46.9532	1.35413	1.37155	4.46643	4.35926	5.61633	5.66695	13.0211	12.7867	17.4193	17.4181	31.6827	31.2924	46.295	45.5616
104.648	1.97083	1.94763	5.72449	5.56856	6.24158	6.28489	14.193	13.851	18.6525	18.5646	34.0846	33.6493	47.6122	46.9889	1.35144	1.37328	4.47522	4.36365	5.61902	5.6728	13.0319	12.7988	17.4362	17.4351	31.7074	31.3197	46.329	45.5965
104.748	1.97742	1.94967	5.72961	5.57381	6.24866	6.29128	14.2113	13.8638	18.6832	18.5826	34.1205	33.6773	47.6505	47.0245	1.35608	1.37501	4.48596	4.36803	5.62415	5.67865	13.0515	12.8108	17.4581	17.4522	31.7238	31.3469	46.371	45.6314
104.848	1.99097	1.9517	5.73901	5.57905	6.2561	6.29767	14.2366	13.8767	18.7102	18.6006	34.1536	33.7054	47.6853	47.0602	1.36963	1.37674	4.4917	4.37242	5.63354	5.6845	13.0537	12.8229	17.48	17.4692	31.7646	31.3742	46.4138	45.6663
104.948	1.99512	1.95374	5.7395	5.58429	6.26636	6.30406	14.2429	13.8895	18.7261	18.6186	34.1792	33.7334	47.7151	47.0959	1.37012	1.37846	4.49585	4.37681	5.63403	5.69035	13.067	12.8349	17.4917	17.4862	31.7964	31.4014	46.4375	45.7012
105.048	1.99719	1.95578	5.73914	5.58953	6.26233	6.31045	14.2562	13.9023	18.736	18.6366	34.2125	33.7615	47.7557	47.1315	1.36975	1.38019	4.48987	4.38119	5.63562	5.6962	13.0721	12.847	17.5109	17.5032	31.8156	31.4287	46.4689	45.7361
105.148	1.99988	1.95781	5.74792	5.59477	6.26697	6.31684	14.2728	13.9152	18.7523	18.6546	34.2347	33.7895	47.7958	47.1672	1.36682	1.38192	4.50232	4.38557	5.65247	5.70204	13.0781	12.8591	17.5355	17.5202	31.8439	31.4559	46.4967	45.771
105.248	2.0022	1.95985	5.75781	5.60001	6.27124	6.32323	14.2869	13.928	18.7681	18.6726	34.2566	33.8176	47.8372	47.2028	1.37109	1.38364	4.51074	4.38996	5.6543	5.70789	13.0767	12.8711	17.5378	17.5372	31.8733	31.4831	46.5364	45.8059
105.348	2.00269	1.96188	5.76245	5.60525	6.27393	6.32961	14.2874	13.9408	18.7866	18.6906	34.2803	33.8456	47.8689	47.2384	1.37158	1.38537	4.50342	4.39434	5.65894	5.71373	13.0981	12.8832	17.5579	17.5542	31.9092	31.5104	46.5681	45.8407
105.448	2.01245	1.96392	5.77222	5.61049	6.27954	6.336	14.313	13.9536	18.7983	18.7086	34.3218	33.8736	47.906	47.274	1.38135	1.3871	4.50342	4.39872	5.66504	5.71957	13.1033	12.8952	17.5676	17.5712	31.9385	31.5376	46.6016	45.8755
105.548	2.01758	1.96595	5.77734	5.61573	6.28101	6.34238	14.312	13.9665	18.8132	18.7266	34.3423	33.9017	47.9424	47.3096	1.38647	1.38882	4.50854	4.4031	5.66406	5.72541	13.1005	12.9073	17.5806	17.5882	31.9595	31.5648	46.6318	45.9104
105.648	2.00501	1.96798	5.77454	5.62097	6.28943	6.34876	14.3209	13.9793	18.8314	18.7446	34.361	33.9297	47.9764	47.3452	1.37781	1.39055	4.50574	4.40748	5.66687	5.73125	13.1129	12.9193	17.5951	17.6051	31.9874	31.592	46.6659	45.9452
105.748	2.0155	1.97002	5.78699	5.62621	6.30041	6.35515	14.3412	13.9921	18.8561	18.7626	34.4027	33.9577	48.0321	47.3807	1.38464	1.39227	4.51819	4.41186	5.67981	5.73708	13.121	12.9314	17.6312	17.6221	32.0179	31.6192	46.7062	45.98
105.848	2.01379	1.97205	5.78723	5.63144	6.29456	6.36152	14.3531	14.0049	18.8617	18.7806	34.4205	33.9857	48.0692	47.4163	1.37073	1.394	4.50671	4.41624	5.68323	5.74292	13.1467	12.9434	17.6371	17.6391	32.0372	31.6464	46.7352	46.0148
105.948	2.01855	1.97408	5.79199	5.63668	6.29932	6.3679	14.3694	14.0178	18.8823	18.7986	34.4504	34.0137	48.1111	47.4518	1.37964	1.39572	4.51514	4.42062	5.69824	5.74876	13.1533	12.9554	17.6711	17.6561	32.0676	31.6736	46.7693	46.0495
106.048	2.02051	1.97611	5.79199	5.64191	6.30347	6.37428	14.3816	14.0306	18.8982	18.8165	34.4841	34.0417	48.1428	47.4873	1.38159	1.39744	4.51343	4.425	5.70019	5.75459	13.1637	12.9675	17.6716	17.6731	32.0872	31.7007	46.8086	46.0843
106.148	2.01965	1.97815	5.7948	5.64715	6.30579	6.38066	14.3881	14.0434	18.9086	18.8345	34.4967	34.0697	48.1805	47.5228	1.38074	1.39917	4.51624	4.42938	5.69934	5.76042	13.1813	12.9795	17.682	17.69	32.1132	31.7279	46.8387	46.119
106.248	2.01746	1.98018	5.8009	5.65238	6.32776	6.38703	14.4059	14.0562	18.9342	18.8525	34.5255	34.0977	48.2296	47.5583	1.3844	1.40089	4.526	4.43375	5.703	5.76625	13.1919	12.9915	17.7169	17.707	32.1525	31.7551	46.8798	46.1538
106.348	2.02808	1.98221	5.80542	5.65762	6.33423	6.3934	14.4146	14.069	18.9465	18.8704	34.5679	34.1257	48.2732	47.5938	1.38721	1.40261	4.52686	4.43813	5.71362	5.77208	13.2146	13.0036	17.728	17.7239	32.179	31.7823	46.918	46.1885
106.448	2.03345	1.98424	5.82812	5.66285	6.34155	6.39977	14.4331	14.0818	18.9636	18.8884	34.5964	34.1536	48.3232	47.6293	1.39453	1.40433	4.53003	4.4425	5.72095	5.77791	13.2224	13.0156	17.7329	17.7409	32.1997	31.8094	46.9424	46.2232
106.548	2.0293	1.98627	5.82446	5.66808	6.34351	6.40614	14.4448	14.0946	18.979	18.9064	34.6157	34.1816	48.3586	47.6648	1.37305	1.40606	4.53003	4.44688	5.71484	5.78374	13.2234	13.0276	17.7468	17.7579	32.2151	31.8366	46.9736	46.2579
106.648	2.02222	1.9883	5.82495	5.67331	6.34766	6.41251	14.4517	14.1074	18.9917	18.9243	34.6399	34.2096	48.3884	47.7002	1.36182	1.40778	4.52295	4.45125	5.71387	5.78956	13.2388	13.0397	17.7473	17.7748	32.2314	31.8637	47.0056	46.2926
106.748	2.02637	1.99033	5.8291	5.67854	6.36011	6.41888	14.446	14.1203	19.0056	18.9423	34.6658	34.2375	48.4238	47.7356	1.36597	1.4095	4.5271	4.45562	5.71387	5.79538	13.2469	13.0517	17.7632	17.7917	32.2551	31.8909	47.041	46.3272
106.848	2.0304	1.99236	5.83118	5.68377	6.35803	6.42525	14.4613	14.1331	19.0114	18.9602	34.7006	34.2655	48.4669	47.7711	1.37366	1.41122	4.53113	4.45999	5.72156	5.80121	13.2583	13.0637	17.7787	17.8087	32.2823	31.918	47.08	46.3619
106.948	2.03198	1.99439	5.8291	5.689	6.35962	6.43161	14.4768	14.1459	19.0247	18.9782	34.7278	34.2934	48.49	47.8065	1.37354	1.41294	4.53833	4.46436	5.72363	5.80703	13.28	13.0757	17.7944	17.8256	32.3096	31.9451	47.115	46.3965
107.048	2.04565	1.99642	5.83862	5.69423	6.37329	6.43798	14.4966	14.1587	19.0579	18.9961	34.7671	34.3214	48.5427	47.8419	1.38159	1.41466	4.54468	4.46874	5.73315	5.81285	13.2867	13.0877	17.8118	17.8426	32.3428	31.9722	47.1619	46.4311
107.148	2.05481	1.99845	5.84778	5.69946	6.38245	6.44434	14.5052	14.1715	19.0804	19.0141	34.7953	34.3493	48.5695	47.8773	1.39026	1.41638	4.55139	4.4731	5.74597	5.81867	13.3033	13.0998	17.8363	17.8595	32.3695	31.9994	47.2059	46.4658
107.248	2.05945	2.00047	5.85828	5.70469	6.38147	6.4507	14.5299	14.1842	19.101	19.032	34.8199	34.3772	48.6207	47.9126	1.39905	1.4181	4.54846	4.47747	5.75476	5.82448	13.323	13.1118	17.8451	17.8764	32.3937	32.0265	47.2343	46.5004
107.348	2.05566	2.0025	5.86987	5.70991	6.40063	6.45706	14.5354	14.197	19.1265	19.0499	34.845	34.4052	48.6602	47.948	1.41064	1.41982	4.56201	4.48184	5.7627	5.8303	13.322	13.1238	17.8762	17.8933	32.4226	32.0536	47.2732	46.5349
107.448	2.05469	2.00453	5.87134	5.71514	6.4021	6.46342	14.5427	14.2098	19.1392	19.0679	34.8813	34.4331	48.7041	47.9834	1.40039	1.42154	4.56714	4.48621	5.76367	5.83611	13.3455	13.1358	17.8813	17.9103	32.4478	32.0807	47.3096	46.5695
107.548	2.05859	2.00656	5.87695	5.72037	6.40771	6.46978	14.5564	14.2226	19.1667	19.0858	34.9089	34.461	48.7395	48.0187	1.40601	1.42326	4.57104	4.49058	5.77539	5.84193	13.3436	13.1478	17.9048	17.9272	32.4785	32.1078	47.3489	46.6041
107.648	2.05676	2.00858	5.87317	5.72559	6.40393	6.47614	14.5541	14.2354	19.1666	19.1037	34.9242	34.4889	48.7665	48.054	1.40784	1.42498	4.57288	4.49494	5.77722	5.84774	13.3569	13.1598	17.9144	17.9441	32.5004	32.1349	47.3759	46.6386
107.748	2.05664	2.01061	5.88672	5.73082	6.41357	6.48249	14.5681	14.2482	19.186	19.1216	34.9497	34.5168	48.8115	48.0893	1.40234	1.42669	4.56714	4.49931	5.7832	5.85355	13.371	13.1718	17.9285	17.961	32.5334	32.1619	47.4092	46.6732
107.848	2.05286	2.01263	5.8927	5.73604	6.41541	6.48884	14.5717	14.261	19.1996	19.1396	34.9674	34.5447	48.8329	48.1246	1.39441	1.42841	4.57458	4.50367	5.77942	5.85936	13.3776	13.1838	17.9261	17.9779	32.5431	32.189	47.4442	46.7077
107.948	2.05945	2.01466	5.89929	5.74126	6.43225	6.4952	14.5963	14.2738	19.2184	19.1575	35.0052	34.5726	48.8749	48.1599	1.401	1.43013	4.57776	4.50804	5.78601	5.86517	13.3961	13.1958	17.9447	17.9948	32.5851	32.2161	47.4745	46.7422
108.048	2.06653	2.01668	5.90637	5.74649	6.42712	6.50155	14.6029	14.2866	19.2272	19.1754	35.0355	34.6005	48.9266	48.1952	1.40002	1.43185	4.58289	4.5124	5.79675	5.87097	13.3954	13.2078	17.9672	18.0117	32.6117	32.2431	47.5109	46.7767
108.148	2.05359	2.01871	5.90515	5.75171	6.44006	6.5079	14.6158	14.2993	19.2455	19.1933	35.0599	34.6284	48.9591	48.2304	1.39929	1.43356	4.57581	4.51676	5.80164	5.87678	13.4117	13.2198	17.9799	18.0286	32.6222	32.2702	47.5389	46.8112
108.248	2.06238	2.02073	5.91394	5.75693	6.44275	6.51425	14.6227	14.3121	19.2604	19.2112	35.1	34.6563	49.0009	48.2657	1.40393	1.43528	4.59021	4.52112	5.80676	5.88258	13.4293	13.2318	17.9948	18.0455	32.6388	32.2973	47.579	46.8456
108.348	2.06848	2.02276	5.92371	5.76215	6.45251	6.52059	14.6283	14.3249	19.2738	19.2291	35.1293	34.6841	49.0419	48.3009	1.4137	1.437	4.58874	4.52549	5.80676	5.88839	13.4342	13.2438	17.9948	18.0624	32.67	32.3243	47.62	46.8801
108.448	2.0636	2.02478	5.92297	5.76737	6.45374	6.52694	14.6449	14.3377	19.2867	19.247	35.15	34.712	49.0704	48.3362	1.40515	1.43871	4.58948	4.52985	5.80554	5.89419	13.452	13.2558	18.0033	18.0793	32.6984	32.3513	47.6444	46.9145
108.548	2.0636	2.0268	5.92859	5.77259	6.45374	6.53329	14.6608	14.3504	19.3119	19.2649	35.1696	34.7399	49.1017	48.3714	1.41077	1.44043	4.60486	4.53421	5.80969	5.89999	13.4608	13.2678	18.0248	18.0962	32.7159	32.3784	47.6854	46.9489
108.648	2.06042	2.02883	5.93567	5.77781	6.45837	6.53963	14.6752	14.3632	19.3307	19.2828	35.2054	34.7677	49.1259	48.4066	1.40613	1.44214	4.60828	4.53856	5.81628	5.90579	13.467	13.2798	18.0472	18.113	32.7426	32.4054	47.7235	46.9834
108.748	2.06152	2.03085	5.94189	5.78303	6.46509	6.54597	14.6899	14.376	19.3391	19.3007	35.2261	34.7956	49.1638	48.4417	1.40674	1.44386	4.60889	4.54292	5.81323	5.91158	13.4824	13.2918	18.054	18.1299	32.7627	32.4324	47.7559	47.0178
108.848	2.06665	2.03287	5.95727	5.78824	6.48413	6.55231	14.7065	14.3887	19.3601	19.3186	35.2681	34.8234	49.2141	48.4769	1.42163	1.44557	4.62378	4.54728	5.82813	5.91738	13.486	13.3037	18.0767	18.1468	32.7971	32.4594	47.8057	47.0521
108.948	2.06042	2.03489	5.94543	5.79346	6.47229	6.55865	14.7045	14.4015	19.3617	19.3365	35.2897	34.8513	49.2335	48.5121	1.41589	1.44728	4.62366	4.55164	5.81262	5.92317	13.5085	13.3157	18.0826	18.1637	32.8241	32.4864	47.8312	47.0865
109.048	2.06763	2.03692	5.95019	5.79868	6.47339	6.56499	14.7234	14.4143	19.3921	19.3543	35.3198	34.8791	49.2578	48.5472	1.42065	1.449	4.63452	4.55599	5.81933	5.92897	13.5077	13.3277	18.0972	18.1805	32.8469	32.5135	47.8574	47.1209
109.148	2.06628	2.03894	5.953	5.80389	6.47205	6.57133	14.7242	14.427	19.401	19.3722	35.3385	34.9069	49.2997	48.5824	1.41565	1.45071	4.62561	4.56035	5.81848	5.93476	13.5211	13.3397	18.1117	18.1974	32.881	32.5405	47.8915	47.1552
109.248	2.06067	2.04096	5.96472	5.80911	6.47815	6.57766	14.7279	14.4398	19.4127	19.3901	35.3617	34.9347	49.337	48.6175	1.41565	1.45242	4.63538	4.5647	5.82214	5.94055	13.5377	13.3516	18.1293	18.2142	32.9005	32.5674	47.9286	47.1896
109.348	2.05945	2.04298	5.96594	5.81432	6.48865	6.584	14.7389	14.4526	19.4156	19.408	35.3922	34.9626	49.3671	48.6526	1.42053	1.45414	4.63245	4.56906	5.82703	5.94634	13.5428	13.3636	18.1459	18.2311	32.9288	32.5944	47.9647	47.2239
109.448	2.06457	2.045	5.9823	5.81953	6.49377	6.59033	14.7533	14.4653	19.4418	19.4258	35.4261	34.9904	49.3995	48.6877	1.42566	1.45585	4.63147	4.57341	5.83777	5.95213	13.5525	13.3756	18.1588	18.2479	32.9591	32.6214	48.0011	47.2582
109.548	2.06641	2.04702	5.97656	5.82475	6.49561	6.59666	14.7673	14.4781	19.4558	19.4437	35.4517	35.0182	49.4326	48.7228	1.41577	1.45756	4.63745	4.57776	5.84375	5.95791	13.563	13.3876	18.1724	18.2648	32.9846	32.6484	48.0225	47.2925
109.648	2.0769	2.04904	5.99878	5.82996	6.50244	6.603	14.7854	14.4908	19.4761	19.4616	35.4761	35.046	49.459	48.7578	1.42627	1.45927	4.64795	4.58212	5.8562	5.9637	13.5789	13.3995	18.1946	18.2816	33.0146	32.6754	48.0603	47.3268
109.748	2.08106	2.05106	5.99731	5.83517	6.50049	6.60932	14.7974	14.5036	19.4705	19.4794	35.5073	35.0738	49.498	48.7929	1.42261	1.46098	4.64429	4.58647	5.86035	5.96948	13.5789	13.4115	18.2009	18.2985	33.0383	32.7023	48.0957	47.361
109.848	2.06958	2.05308	5.99316	5.84038	6.50049	6.61565	14.8035	14.5163	19.4839	19.4973	35.5232	35.1016	49.5293	48.8279	1.41895	1.46269	4.63452	4.59082	5.85474	5.97526	13.6021	13.4234	18.2085	18.3153	33.0579	32.7293	48.1152	47.3953
109.948	2.07886	2.05509	6.00488	5.84559	6.51221	6.62198	14.8169	14.5291	19.511	19.5151	35.5637	35.1293	49.5781	48.863	1.42822	1.4644	4.65552	4.59517	5.86597	5.98105	13.6143	13.4354	18.2317	18.3321	33.0984	32.7562	48.1619	47.4295
110.048	2.07129	2.05711	6.00293	5.8508	6.51831	6.62831	14.8169	14.5418	19.5193	19.533	35.5874	35.1571	49.6094	48.898	1.43237	1.46611	4.6521	4.59952	5.87012	5.98683	13.6156	13.4474	18.2358	18.349	33.1204	32.7832	48.1992	47.4637
110.148	2.08118	2.05913	5.99915	5.85601	6.51404	6.63463	14.8268	14.5546	19.5231	19.5508	35.6051	35.1849	49.6466	48.933	1.41882	1.46782	4.65393	4.60386	5.87195	5.9926	13.6392	13.4593	18.2513	18.3658	33.1495	32.8101	48.2401	47.498
110.248	2.07715	2.06115	6.00684	5.86122	6.53149	6.64095	14.8459	14.5673	19.5386	19.5687	35.644	35.2127	49.6892	48.968	1.43213	1.46953	4.66357	4.60821	5.8894	5.99838	13.656	13.4713	18.2766	18.3826	33.1731	32.837	48.2771	47.5322
110.348	2.07617	2.06316	6.01562	5.86643	6.54077	6.64727	14.8572	14.58	19.5493	19.5865	35.6589	35.2404	49.7256	49.003	1.42944	1.47124	4.67236	4.61256	5.89453	6.00416	13.661	13.4832	18.2935	18.3994	33.2053	32.864	48.3135	47.5663
110.448	2.07898	2.06518	6.01477	5.87164	6.53943	6.6536	14.8502	14.5928	19.5717	19.6044	35.6869	35.2682	49.7638	49.0379	1.42664	1.47295	4.66956	4.6169	5.89368	6.00993	13.6589	13.4952	18.2926	18.4162	33.2277	32.8909	48.3358	47.6005
110.548	2.07739	2.0672	6.00708	5.87684	6.5415	6.65991	14.856	14.6055	19.5818	19.6222	35.7085	35.2959	49.7834	49.0729	1.41895	1.47466	4.67725	4.62125	5.88965	6.01571	13.6705	13.5071	18.3003	18.4331	33.2493	32.9178	48.377	47.6347
110.648	2.07922	2.06921	6.01257	5.88205	6.54749	6.66623	14.8756	14.6183	19.5914	19.64	35.7438	35.3237	49.8319	49.1078	1.42639	1.47637	4.69495	4.62559	5.90125	6.02148	13.6899	13.5191	18.3197	18.4499	33.2804	32.9447	48.4081	47.6688
110.748	2.08276	2.07123	6.02026	5.88725	6.55103	6.67255	14.8772	14.631	19.6145	19.6578	35.7786	35.3514	49.8669	49.1427	1.43408	1.47808	4.69482	4.62994	5.90527	6.02725	13.709	13.531	18.3237	18.4667	33.3076	32.9716	48.4434	47.7029
110.848	2.09399	2.07324	6.04883	5.89246	6.57397	6.67886	14.8982	14.6437	19.6375	19.6757	35.821	35.3792	49.929	49.1777	1.43726	1.47978	4.7041	4.63428	5.91602	6.03302	13.7047	13.543	18.3442	18.4835	33.3362	32.9985	48.4814	47.7371
110.948	2.08972	2.07526	6.05066	5.89766	6.5697	6.68518	14.9037	14.6564	19.641	19.6935	35.8363	35.4069	49.9579	49.2126	1.43542	1.48149	4.69006	4.63862	5.91785	6.03879	13.7145	13.5549	18.3539	18.5003	33.3539	33.0254	48.5145	47.7712
111.048	2.09387	2.07727	6.05481	5.90287	6.58728	6.69149	14.9215	14.6692	19.6569	19.7113	35.86	35.4346	50.0067	49.2474	1.43909	1.4832	4.69983	4.64297	5.922	6.04455	13.7361	13.5668	18.3773	18.5171	33.3771	33.0523	48.5438	47.8053
111.148	2.09766	2.07929	6.05859	5.90807	6.59521	6.6978	14.9275	14.6819	19.6685	19.7291	35.895	35.4623	50.0403	49.2823	1.43921	1.4849	4.69995	4.64731	5.92944	6.05032	13.7506	13.5788	18.3894	18.5338	33.4045	33.0792	48.583	47.8393
111.248	2.0929	2.0813	6.06165	5.91327	6.60193	6.70411	14.9362	14.6946	19.6869	19.7469	35.9213	35.49	50.0646	49.3172	1.44592	1.48661	4.70862	4.65165	5.93665	6.05608	13.7655	13.5907	18.4017	18.5506	33.4308	33.106	48.6036	47.8734
111.348	2.09558	2.08331	6.06067	5.91847	6.61877	6.71042	14.9352	14.7074	19.7018	19.7647	35.9613	35.5177	50.1066	49.352	1.45471	1.48832	4.70569	4.65599	5.94128	6.06184	13.7653	13.6026	18.4183	18.5674	33.4591	33.1329	48.6315	47.9074
111.448	2.09387	2.08533	6.06629	5.92367	6.61658	6.71673	14.9408	14.7201	19.7094	19.7826	35.9889	35.5454	50.1337	49.3869	1.44885	1.49002	4.70154	4.66033	5.93909	6.0676	13.7878	13.6146	18.434	18.5842	33.4825	33.1597	48.6671	47.9415
111.548	2.09082	2.08734	6.09644	5.92887	6.62939	6.72304	14.9709	14.7328	19.7473	19.8004	36.0171	35.5731	50.1833	49.4217	1.46362	1.49173	4.72607	4.66466	5.95801	6.07337	13.7996	13.6265	18.4641	18.601	33.5244	33.1866	48.7126	47.9755
111.648	2.09277	2.08935	6.09888	5.93407	6.63135	6.72934	14.979	14.7455	19.7595	19.8182	36.0366	35.6008	50.2229	49.4565	1.46362	1.49343	4.72437	4.669	5.95801	6.07912	13.8007	13.6384	18.478	18.6177	33.55	33.2135	48.7461	48.0095
111.748	2.09583	2.09136	6.09583	5.93927	6.6344	6.73564	15.0016	14.7582	19.7816	19.8359	36.069	35.6285	50.2684	49.4913	1.47034	1.49514	4.73108	4.67334	5.96472	6.08488	13.7948	13.6503	18.4965	18.6345	33.5763	33.2403	48.7667	48.0435
111.848	2.09363	2.09337	6.09363	5.94447	6.63416	6.74195	15.0111	14.7709	19.7933	19.8537	36.0883	35.6562	50.3077	49.5261	1.45886	1.49684	4.73499	4.67767	5.96497	6.09064	13.8188	13.6623	18.5082	18.6513	33.5844	33.2671	48.786	48.0775
111.948	2.11011	2.09539	6.11011	5.94967	6.64697	6.74825	15.0298	14.7837	19.8215	19.8715	36.1323	35.6839	50.3455	49.5609	1.46924	1.49854	4.75146	4.68201	5.98901	6.09639	13.8291	13.6742	18.5308	18.668	33.6145	33.294	48.8301	48.1115
112.048	2.11255	2.0974	6.11255	5.95486	6.65479	6.75455	15.0317	14.7964	19.8357	19.8893	36.1519	35.7115	50.3772	49.5956	1.46973	1.50025	4.7478	4.68634	5.99512	6.10214	13.8345	13.6861	18.5327	18.6848	33.636	33.3208	48.8633	48.1454
112.148	2.10864	2.09941	6.11426	5.96006	6.65503	6.76085	15.0493	14.8091	19.8452	19.9071	36.1833	35.7392	50.418	49.6304	1.45801	1.50195	4.75366	4.69068	6.00098	6.1079	13.8562	13.698	18.5483	18.7015	33.6614	33.3476	48.8887	48.1793
112.248	2.11401	2.10142	6.12378	5.96526	6.65479	6.76714	15.061	14.8218	19.8665	19.9249	36.2083	35.7668	50.4668	49.6651	1.46338	1.50365	4.74976	4.69501	6.0105	6.11365	13.8621	13.7099	18.5696	18.7183	33.6848	33.3744	48.9238	48.2133
112.348	2.10645	2.10343	6.12231	5.97045	6.6665	6.77344	15.0671	14.8345	19.8728	19.9427	36.24	35.7945	50.5002	49.6998	1.46387	1.50536	4.75342	4.69934	6.01465	6.1194	13.8679	13.7218	18.5759	18.735	33.6987	33.4012	48.9512	48.2472
112.448	2.12402	2.10544	6.12402	5.97565	6.67798	6.77974	15.0823	14.8472	19.8918	19.9604	36.2747	35.8221	50.5447	49.7345	1.45752	1.50706	4.75928	4.70368	6.02246	6.12514	13.8816	13.7338	18.595	18.7518	33.7256	33.428	48.9822	48.2811
112.548	2.12036	2.10745	6.12598	5.98084	6.67847	6.78603	15.0964	14.8599	19.9021	19.9782	36.3003	35.8498	50.582	49.7692	1.46362	1.50876	4.771	4.70801	6.02246	6.13089	13.895	13.7457	18.6128	18.7685	33.7476	33.4548	49.0195	48.315
112.648	2.11597	2.10945	6.13745	5.98603	6.68579	6.79232	15.1135	14.8726	19.9272	19.996	36.3374	35.8774	50.6289	49.8039	1.4751	1.51046	4.77881	4.71234	6.02832	6.13664	13.9092	13.7576	18.6265	18.7852	33.7725	33.4816	49.0623	48.3488
112.748	2.12598	2.11146	6.14185	5.99123	6.69995	6.79861	15.1257	14.8853	19.9353	20.0137	36.3572	35.905	50.6604	49.8385	1.47949	1.51216	4.7771	4.71667	6.03418	6.14238	13.9227	13.7695	18.6323	18.802	33.802	33.5084	49.0918	48.3827
112.848	2.13196	2.11347	6.16101	5.99642	6.70544	6.8049	15.1449	14.898	19.9525	20.0315	36.3959	35.9327	50.7069	49.8732	1.48132	1.51386	4.79431	4.721	6.04211	6.14812	13.9243	13.7814	18.6556	18.8187	33.837	33.5351	49.1346	48.4165
112.948	2.1355	2.11548	6.1687	6.00161	6.71924	6.81119	15.1567	14.9107	19.968	20.0492	36.4194	35.9603	50.7458	49.9078	1.48486	1.51556	4.8081	4.72532	6.04565	6.15386	13.9373	13.7933	18.6711	18.8354	33.8643	33.5619	49.1697	48.4504
113.048	2.14868	2.11749	6.16821	6.0068	6.72021	6.81748	15.1675	14.9234	19.9812	20.067	36.438	35.9879	50.7727	49.9425	1.48779	1.51726	4.80542	4.72965	6.04712	6.1596	13.9595	13.8052	18.688	18.8522	33.8853	33.5887	49.208	48.4842
113.148	2.14941	2.11949	6.17456	6.01199	6.73877	6.82376	15.1858	14.9361	20.0051	20.0847	36.4624	36.0155	50.8047	49.9771	1.49878	1.51896	4.8042	4.73398	6.05151	6.16534	13.9629	13.8171	18.7007	18.8689	33.9092	33.6154	49.238	48.518
113.248	2.14868	2.1215	6.16821	6.01718	6.73804	6.83005	15.2029	14.9487	20.0164	20.1025	36.4929	36.0431	50.843	50.0117	1.49194	1.52066	4.81885	4.7383	6.06055	6.17108	13.9723	13.829	18.7173	18.8856	33.9321	33.6422	49.2666	48.5518
113.348	2.13269	2.12351	6.16394	6.02237	6.73376	6.83633	15.2028	14.9614	20.0258	20.1202	36.5101	36.0707	50.8719	50.0463	1.49011	1.52236	4.82678	4.74263	6.05872	6.17681	13.9813	13.8408	18.7328	18.9023	33.9493	33.6689	49.296	48.5856
113.448	2.14368	2.12551	6.17493	6.02756	6.74084	6.84261	15.2152	14.9741	20.0521	20.138	36.5426	36.0983	50.9044	50.0808	1.48889	1.52406	4.81995	4.74695	6.0575	6.18255	13.9868	13.8527	18.7455	18.919	33.9818	33.6957	49.3143	48.6193
113.548	2.1394	2.12752	6.18237	6.03274	6.74268	6.84889	15.2385	14.9868	20.0718	20.1557	36.5676	36.1259	50.9373	50.1154	1.49268	1.52576	4.83154	4.75128	6.06348	6.18828	14.0037	13.8646	18.7632	18.9357	34.0088	33.7224	49.3572	48.6531
113.648	2.15259	2.12952	6.20117	6.03793	6.76147	6.85517	15.2576	14.9995	20.1021	20.1735	36.6062	36.1535	50.9993	50.15	1.50952	1.52746	4.84619	4.7556	6.07617	6.19401	14.0145	13.8765	18.7837	18.9524	34.0452	33.7491	49.4014	48.6868
113.748	2.14929	2.13153	6.20398	6.04312	6.76013	6.86145	15.2679	15.0122	20.0992	20.1912	36.6361	36.181	51.0292	50.1845	1.51233	1.52915	4.85315	4.75992	6.07898	6.19974	14.0222	13.8884	18.7946	18.9691	34.0619	33.7758	49.4354	48.7205
113.848	2.15527	2.13353	6.20435	6.0483	6.76245	6.86773	15.2781	15.0248	20.115	20.2089	36.658	36.2086	51.0588	50.219	1.52026	1.53085	4.84741	4.76424	6.08496	6.20547	14.0359	13.9003	18.8022	18.9858	34.0776	33.8026	49.4746	48.7542
113.948	2.15918	2.13554	6.20776	6.05349	6.77368	6.874	15.2876	15.0375	20.1299	20.2266	36.6926	36.2362	51.0996	50.2535	1.52783	1.53255	4.84351	4.76857	6.08887	6.2112	14.0387	13.9122	18.8215	19.0025	34.1006	33.8293	49.5017	48.7879
114.048	2.16199	2.13754	6.21106	6.05867	6.77698	6.88028	15.2926	15.0502	20.149	20.2444	36.7191	36.2637	51.1278	50.288	1.51746	1.53425	4.84998	4.77289	6.08972	6.21693	14.0613	13.924	18.8285	19.0192	34.1351	33.856	49.5399	48.8216
114.148	2.18042	2.13954	6.22339	6.06385	6.78564	6.88655	15.3167	15.0629	20.175	20.2621	36.7515	36.2913	51.1892	50.3225	1.53174	1.53594	4.86279	4.77721	6.10815	6.22265	14.0758	13.9359	18.8547	19.0358	34.1592	33.8827	49.5857	48.8552
114.248	2.18176	2.14154	6.22473	6.06904	6.79822	6.89282	15.3297	15.0755	20.1898	20.2798	36.7799	36.3188	51.2198	50.357	1.5387	1.53764	4.86975	4.78152	6.11707	6.22838	14.0865	13.9478	18.8698	19.0525	34.1857	33.9093	49.6239	48.8889
114.348	2.18274	2.14355	6.23132	6.07422	6.80334	6.89909	15.3441	15.0882	20.2145	20.2975	36.806	36.3463	51.2557	50.3914	1.54382	1.53933	4.88049	4.78584	6.12781	6.2341	14.1024	13.9597	18.8881	19.0692	34.2123	33.936	49.6542	48.9225
114.448	2.18835	2.14555	6.24524	6.0794	6.80334	6.90536	15.3619	15.1009	20.2318	20.3152	36.8353	36.3739	51.3046	50.4259	1.54944	1.54103	4.88245	4.79016	6.13196	6.23982	14.1149	13.9715	18.9056	19.0859	34.2355	33.9627	49.6952	48.9562
114.548	2.19714	2.14755	6.24426	6.08458	6.81018	6.91163	15.3688	15.1135	20.2448	20.3329	36.8698	36.4014	51.3292	50.4603	1.55457	1.54272	4.87952	4.79448	6.13879	6.24554	14.1228	13.9834	18.9144	19.1025	34.2638	33.9894	49.7198	48.9898
114.648	2.21118	2.14955	6.24609	6.08976	6.81396	6.9179	15.3706	15.1262	20.2664	20.3506	36.8931	36.4289	51.3704	50.4947	1.5564	1.54442	4.88745	4.79879	6.14258	6.25126	14.1373	13.9953	18.9341	19.1192	34.2876	34.016	49.749	49.0234
114.748	2.19251	2.15155	6.24329	6.09494	6.81311	6.92416	15.3795	15.1389	20.2709	20.3683	36.9235	36.4564	51.3907	50.5291	1.55359	1.54611	4.89026	4.80311	6.14539	6.25698	14.1492	14.0071	18.9391	19.1358	34.3002	34.0427	49.7831	49.0569
114.848	2.20776	2.15356	6.24683	6.10012	6.82275	6.93043	15.3909	15.1515	20.2903	20.386	36.9409	36.484	51.4255	50.5635	1.54932	1.54781	4.89795	4.80742	6.15308	6.26269	14.1522	14.019	18.9543	19.1525	34.3308	34.0693	49.8123	49.0905
114.948	2.21692	2.15556	6.25598	6.1053	6.81409	6.93669	15.4117	15.1642	20.3073	20.4037	36.9672	36.5115	51.4579	50.5979	1.55847	1.5495	4.89124	4.81174	6.16223	6.26841	14.1656	14.0308	18.983	19.1691	34.3693	34.096	49.8563	49.1241
115.048	2.21497	2.15756	6.25403	6.11048	6.82751	6.94295	15.4098	15.1768	20.317	20.4214	36.9945	36.539	51.4991	50.6322	1.56018	1.55119	4.901	4.81605	6.16394	6.27412	14.1667	14.0427	18.9847	19.1858	34.3966	34.1226	49.8781	49.1576
115.148	2.21558	2.15956	6.25464	6.11566	6.82861	6.94921	15.4202	15.1895	20.3428	20.4391	37.0288	36.5665	51.5212	50.6666	1.5669	1.55289	4.90772	4.82036	6.18237	6.27983	14.1863	14.0545	19.011	19.2024	34.4229	34.1493	49.9119	49.1911
115.248	2.21411	2.16156	6.28223	6.12083	6.84033	6.95547	15.4478	15.2021	20.3591	20.4568	37.0659	36.5939	51.5647	50.7009	1.56738	1.55458	4.91186	4.82467	6.19458	6.28554	14.1971	14.0664	19.0349	19.2191	34.4546	34.1759	49.9551	49.2246
115.348	2.21277	2.16355	6.28137	6.12601	6.83948	6.96173	15.4449	15.2148	20.3717	20.4744	37.0748	36.6214	51.589	50.7352	1.56604	1.55627	4.90686	4.82898	6.19128	6.29125	14.205	14.0782	19.0394	19.2357	34.4708	34.2025	49.9835	49.2581
115.448	2.21887	2.16555	6.28918	6.13118	6.84729	6.96798	15.4567	15.2274	20.3969	20.4921	37.1117	36.6489	51.62	50.7695	1.57581	1.55796	4.91663	4.8333	6.20105	6.29696	14.2115	14.0901	19.0492	19.2523	34.5118	34.2291	50.0204	49.2916
115.548	2.22351	2.16755	6.29578	6.13636	6.85193	6.97424	15.4711	15.2401	20.4039	20.5098	37.1383	36.6764	51.662	50.8038	1.58655	1.55966	4.93298	4.8376	6.21374	6.30266	14.231	14.1019	19.0814	19.269	34.5385	34.2557	50.0563	49.3251
115.648	2.22339	2.16955	6.30347	6.14153	6.854	6.98049	15.4983	15.2527	20.425	20.5275	37.1558	36.7038	51.6973	50.8381	1.59424	1.56135	4.93506	4.84191	6.22144	6.30837	14.2461	14.1138	19.0891	19.2856	34.5559	34.2823	50.0957	49.3585
115.748	2.22876	2.17155	6.30688	6.14671	6.87061	6.98674	15.5073	15.2654	20.4402	20.5451	37.1802	36.7313	51.7356	50.8724	1.59766	1.56304	4.94409	4.84622	6.21875	6.31407	14.2471	14.1256	19.1099	19.3022	34.5747	34.3089	50.126	49.392
115.848	2.22192	2.17354	6.30566	6.15188	6.86987	6.99299	15.5183	15.278	20.4412	20.5628	37.2144	36.7587	51.7637	50.9066	1.59644	1.56473	4.93359	4.85053	6.21802	6.31977	14.2506	14.1375	19.1169	19.3188	34.5833	34.3355	50.1484	49.4254
115.948	2.22546	2.17554	6.31335	6.15705	6.8678	6.99924	15.524	15.2907	20.4564	20.5805	37.236	36.7862	51.7987	50.9409	1.58875	1.56642	4.9408	4.85484	6.2196	6.32548	14.2759	14.1493	19.1302	19.3355	34.6105	34.3621	50.1852	49.4588
116.048	2.23901	2.17754	6.32129	6.16222	6.8772	7.00549	15.5432	15.3033	20.4858	20.5981	37.2649	36.8136	51.8398	50.9751	1.59619	1.56811	4.94873	4.85914	6.24487	6.33118	14.2965	14.1611	19.1555	19.3521	34.6399	34.3887	50.2322	49.4922
116.148	2.24622	2.17953	6.32434	6.16739	6.90173	7.01174	15.556	15.3159	20.5043	20.6158	37.3051	36.8411	51.8798	51.0093	1.60901	1.5698	4.95789	4.86345	6.25403	6.33687	14.3094	14.173	19.1761	19.3687	34.6681	34.4153	50.2726	49.5256
116.248	2.24695	2.18153	6.32507	6.17256	6.901	7.01799	15.5651	15.3286	20.517	20.6334	37.3278	36.8685	51.9005	51.0435	1.61023	1.57149	4.95667	4.86775	6.25281	6.34257	14.3132	14.1848	19.181	19.3853	34.6925	34.4418	50.2965	49.5589
116.348	2.25317	2.18353	6.3313	6.17773	6.90112	7.02423	15.5806	15.3412	20.5349	20.6511	37.3474	36.8959	51.9355	51.0777	1.61035	1.57318	4.9624	4.87205	6.2627	6.34827	14.3191	14.1966	19.2026	19.4019	34.7163	34.4684	50.3496	49.5923
116.448	2.23901	2.18552	6.32886	6.1829	6.90063	7.03047	15.5903	15.3538	20.5403	20.6687	37.3665	36.9234	51.9609	51.1119	1.60791	1.57487	4.97217	4.87636	6.2627	6.35396	14.3346	14.2085	19.2141	19.4185	34.7354	34.4949	50.3728	49.6256
116.548	2.24695	2.18752	6.3429	6.18807	6.91272	7.03672	15.6019	15.3665	20.5621	20.6864	37.402	36.9508	51.9982	51.146	1.60803	1.57655	4.974	4.88066	6.26086	6.35965	14.3481	14.2203	19.2301	19.4351	34.755	34.5215	50.4083	49.659
116.648	2.25684	2.18951	6.34668	6.19324	6.92017	7.04296	15.6118	15.3791	20.5833	20.704	37.4253	36.9782	52.0388	51.1802	1.61792	1.57824	4.99365	4.88496	6.27026	6.36535	14.3563	14.2321	19.2473	19.4517	34.7825	34.548	50.4373	49.6923
116.748	2.26453	2.1915	6.3446	6.1984	6.92834	7.0492	15.6276	15.3917	20.6051	20.7216	37.4489	37.0056	52.0802	51.2143	1.62195	1.57993	4.99573	4.88926	6.28406	6.37104	14.3621	14.2439	19.2574	19.4682	34.8116	34.5745	50.4823	49.7256
116.848	2.2666	2.1935	6.35474	6.20357	6.92065	7.05543	15.6333	15.4043	20.6052	20.7393	37.4644	37.033	52.1152	51.2484	1.61987	1.58162	4.9978	4.89356	6.29224	6.37672	14.3777	14.2558	19.2693	19.4848	34.8333	34.6011	50.5039	49.7589
116.948	2.27051	2.19549	6.35254	6.20874	6.92407	7.06167	15.6409	15.417	20.6282	20.7569	37.4976	37.0604	52.1367	51.2825	1.61572	1.5833	4.99756	4.89786	6.29565	6.38241	14.3805	14.2676	19.2825	19.5014	34.8643	34.6276	50.5427	49.7921
117.048	2.27332	2.19749	6.35535	6.2139	6.93909	7.06791	15.6595	15.4296	20.6432	20.7745	37.5199	37.0877	52.1786	51.3166	1.61707	1.58499	5.00452	4.90216	6.29895	6.3881	14.403	14.2794	19.3011	19.518	34.8871	34.6541	50.5692	49.8254
117.148	2.28406	2.19948	6.36609	6.21907	6.95154	7.07414	15.6744	15.4422	20.6556	20.7921	37.5465	37.1151	52.2169	51.3507	1.61804	1.58668	5.0116	4.90646	6.30359	6.39378	14.411	14.2912	19.316	19.5345	34.9113	34.6806	50.6073	49.8586
117.248	2.2843	2.20147	6.36633	6.22423	6.95178	7.08037	15.6823	15.4548	20.6676	20.8097	37.5658	37.1425	52.2443	51.3848	1.61194	1.58836	4.99963	4.91076	6.30383	6.39947	14.4128	14.303	19.3331	19.5511	34.9305	34.7071	50.6444	49.8919
117.348	2.28052	2.20346	6.36816	6.22939	6.96533	7.08661	15.698	15.4674	20.6716	20.8274	37.5974	37.1699	52.2715	51.4188	1.61426	1.59005	4.9978	4.91505	6.30005	6.40515	14.4285	14.3148	19.3433	19.5677	34.9585	34.7336	50.678	49.9251
117.448	2.27051	2.20545	6.37573	6.23455	6.96924	7.09284	15.6995	15.48	20.6868	20.845	37.6282	37.1972	52.3164	51.4529	1.61572	1.59173	5.00732	4.91935	6.30347	6.41083	14.4421	14.3266	19.3586	19.5842	34.9834	34.7601	50.7068	49.9583
117.548	2.27832	2.20745	6.38208	6.23972	6.97144	7.09906	15.7253	15.4927	20.7146	20.8626	37.6482	37.2246	52.3516	51.4869	1.61597	1.59342	5.01318	4.92364	6.31177	6.41651	14.448	14.3384	19.3787	19.6008	34.9976	34.7866	50.75	49.9914
117.648	2.29395	2.20944	6.38379	6.24488	6.97314	7.10529	15.7327	15.5053	20.728	20.8802	37.6812	37.2519	52.4023	51.5209	1.62744	1.5951	5.02515	4.92794	6.31714	6.42219	14.4625	14.3503	19.386	19.6173	35.0244	34.8131	50.7891	50.0246
117.748	2.28699	2.21143	6.39441	6.25004	6.974	7.11152	15.7477	15.5179	20.7367	20.8978	37.6979	37.2793	52.4423	51.5549	1.6344	1.59679	5.0238	4.93223	6.33191	6.42787	14.4648	14.3621	19.4125	19.6339	35.0394	34.8395	50.8114	50.0578
117.848	2.28735	2.21342	6.39673	6.2552	6.97436	7.11774	15.7517	15.5305	20.7488	20.9154	37.7192	37.3066	52.4678	51.5889	1.63672	1.59847	5.01855	4.93653	6.33423	6.43354	14.4684	14.3739	19.4185	19.6504	35.0588	34.866	50.8564	50.0909
117.948	2.27942	2.21541	6.40051	6.26036	6.97424	7.12397	15.7555	15.5431	20.7465	20.933	37.7369	37.334	52.5028	51.6228	1.62878	1.60015	5.01428	4.94082	6.33557	6.43921	14.4927	14.3857	19.4244	19.667	35.0802	34.8925	50.8778	50.124
118.048	2.28223	2.2174	6.40332	6.26552	6.98267	7.13019	15.762	15.5557	20.7749	20.9506	37.7629	37.3613	52.5427	51.6568	1.62939	1.60184	5.02686	4.94511	6.34082	6.44489	14.5006	14.3974	19.4426	19.6835	35.1086	34.9189	50.9216	50.1571
118.148	2.2804	2.21939	6.40149	6.27067	6.98694	7.13641	15.7721	15.5683	20.7963	20.9682	37.7848	37.3886	52.5763	51.6907	1.63733	1.60352	5.02893	4.9494	6.3446	6.45056	14.5144	14.4092	19.4701	19.7	35.13	34.9454	50.9491	50.1902
118.248	2.27832	2.22137	6.40527	6.27583	6.99658	7.14263	15.7817	15.5809	20.8101	20.9857	37.8022	37.4159	52.6077	51.7247	1.62769	1.6052	5.0249	4.95369	6.35449	6.45623	14.532	14.421	19.4685	19.7166	35.1382	34.9718	50.9788	50.2233
118.348	2.28809	2.22336	6.41309	6.28099	7.00635	7.14885	15.8032	15.5935	20.8276	21.0033	37.8433	37.4432	52.6482	51.7586	1.63745	1.60689	5.04248	4.95798	6.3623	6.4619	14.5348	14.4328	19.4875	19.7331	35.167	34.9982	51.0056	50.2564
118.448	2.28894	2.22535	6.41028	6.28614	7.0072	7.15507	15.8119	15.6061	20.85	21.0209	37.8636	37.4705	52.6827	51.7925	1.63464	1.60857	5.04382	4.96227	6.35168	6.46757	14.5436	14.4446	19.5023	19.7496	35.1898	35.0247	51.0516	50.2895
118.548	2.2804	2.22734	6.42102	6.2913	7.01038	7.16128	15.8151	15.6187	20.8668	21.0385	37.8981	37.4978	52.7128	51.8264	1.62952	1.61025	5.03674	4.96656	6.35632	6.47323	14.5586	14.4564	19.5228	19.7661	35.214	35.0511	51.08	50.3225
118.648	2.28516	2.22933	6.42578	6.29645	7.00952	7.1675	15.8259	15.6313	20.8855	21.0561	37.9224	37.5251	52.7473	51.8602	1.63843	1.61193	5.04565	4.97084	6.36523	6.4789	14.5671	14.4682	19.5396	19.7827	35.2424	35.0775	51.1201	50.3555
118.748	2.29199	2.23131	6.43262	6.30161	7.01587	7.17371	15.8401	15.6438	20.9016	21.0736	37.9604	37.5524	52.7927	51.8941	1.63354	1.61361	5.04834	4.97513	6.37573	6.48456	14.5681	14.48	19.552	19.7992	35.2842	35.1039	51.1638	50.3885
118.848	2.28735	2.2333	6.43164	6.30676	7.03271	7.17993	15.8533	15.6564	20.9089	21.0912	37.979	37.5797	52.8174	51.9279	1.63257	1.61529	5.05347	4.97942	6.3772	6.49022	14.5884	14.4917	19.5652	19.8157	35.301	35.1303	51.1885	50.4215
118.948	2.28613	2.23529	6.43457	6.31191	7.03564	7.18614	15.8577	15.669	20.925	21.1088	38.0015	37.607	52.8398	51.9618	1.64111	1.61697	5.05029	4.9837	6.37964	6.49588	14.5963	14.5035	19.5793	19.8322	35.3235	35.1567	51.2244	50.4545
119.048	2.28796	2.23727	6.45007	6.31707	7.04163	7.19235	15.8698	15.6816	20.9408	21.1263	38.0248	37.6342	52.8693	51.9956	1.63367	1.61865	5.06384	4.98798	6.38196	6.50154	14.614	14.5153	19.5817	19.8487	35.3351	35.1831	51.2635	50.4875
119.148	2.2959	2.23926	6.45996	6.32222	7.05103	7.19855	15.8772	15.6942	20.9683	21.1439	38.0659	37.6615	52.9099	52.0294	1.63745	1.62033	5.07568	4.99227	6.39136	6.5072	14.6179	14.5271	19.5989	19.8652	35.3645	35.2095	51.3083	50.5204
119.248	2.28833	2.24124	6.46021	6.32737	7.05737	7.20476	15.8933	15.7068	20.9858	21.1614	38.0857	37.6888	52.9553	52.0632	1.64697	1.62201	5.08569	4.99655	6.39771	6.51286	14.6277	14.5388	19.634	19.8817	35.3997	35.2358	51.3379	50.5534
119.348	2.29565	2.24323	6.46191	6.33252	7.05493	7.21097	15.895	15.7193	20.9937	21.179	38.1125	37.716	52.9841	52.097	1.64331	1.62369	5.07764	5.00083	6.39526	6.51851	14.6315	14.5506	19.6382	19.8982	35.4229	35.2622	51.3806	50.5863
119.448	2.29993	2.24521	6.46008	6.33767	7.06287	7.21717	15.9049	15.7319	21.0035	21.1965	38.1364	37.7433	53.0138	52.1307	1.64148	1.62537	5.08557	5.00512	6.4032	6.52417	14.6433	14.5624	19.6481	19.9147	35.4467	35.2886	51.4254	50.6192
119.548	2.29785	2.2472	6.46362	6.34282	7.06689	7.22337	15.9202	15.7445	21.021	21.2141	38.1692	37.7705	53.0486	52.1645	1.6333	1.62705	5.09326	5.0094	6.40723	6.52982	14.6482	14.5741	19.6497	19.9311	35.46	35.3149	51.4587	50.6521
119.648	2.29712	2.24918	6.47266	6.34797	7.06982	7.22958	15.9333	15.7571	21.0356	21.2316	38.1921	37.7977	53.0908	52.1982	1.64233	1.62872	5.09448	5.01368	6.41431	6.53547	14.6627	14.5859	19.6665	19.9476	35.4829	35.3413	51.499	50.685
119.748	2.29578	2.25116	6.47546	6.35311	7.08435	7.23578	15.9459	15.7696	21.0524	21.2491	38.222	37.825	53.1095	52.2319	1.64514	1.6304	5.08557	5.01796	6.41296	6.54112	14.6807	14.5977	19.6774	19.9641	35.5128	35.3676	51.5292	50.7178
119.848	2.30762	2.25315	6.49536	6.35826	7.09253	7.24198	15.9597	15.7822	21.0679	21.2667	38.2498	37.8522	53.1428	52.2656	1.65332	1.63208	5.10303	5.02223	6.4248	6.54677	14.688	14.6094	19.6887	19.9806	35.5405	35.394	51.5569	50.7507
119.948	2.29785	2.25513	6.49292	6.36341	7.09204	7.24818	15.9536	15.7948	21.0833	21.2842	38.2749	37.8794	53.1794	52.2993	1.64307	1.63376	5.09936	5.02651	6.42285	6.55242	14.6895	14.6212	19.7007	19.997	35.5596	35.4203	51.5857	50.7835
120.048	2.29321	2.25711	6.49243	6.36855	7.09717	7.25437	15.9722	15.8073	21.1079	21.3017	38.2935	37.9066	53.1985	52.333	1.63647	1.63543	5.08862	5.03079	6.41821	6.55806	14.7008	14.6329	19.7134	20.0135	35.5842	35.4466	51.6221	50.8164
120.148	2.2948	2.25909	6.4884	6.3737	7.1051	7.26057	15.9779	15.8199	21.1295	21.3192	38.3131	37.9338	53.2509	52.3667	1.64221	1.63711	5.09436	5.03507	6.41418	6.56371	14.7059	14.6447	19.7308	20.0299	35.6039	35.4729	51.6473	50.8492
120.248	2.30188	2.26108	6.50281	6.37884	7.10608	7.26676	15.9967	15.8325	21.1422	21.3368	38.3453	37.961	53.2853	52.4003	1.64514	1.63878	5.1051	5.03934	6.42078	6.56935	14.7231	14.6564	19.7494	20.0464	35.63	35.4993	51.6971	50.882
120.348	2.29395	2.26306	6.5127	6.38399	7.11548	7.27295	16.0083	15.845	21.1711	21.3543	38.3743	37.9882	53.3357	52.434	1.65503	1.64046	5.10693	5.04362	6.44238	6.57499	14.7264	14.6682	19.7593	20.0629	35.6553	35.5256	51.7322	50.9147
120.448	2.2948	2.26504	6.50989	6.38913	7.12244	7.27915	16.0172	15.8576	21.1859	21.3718	38.3971	38.0154	53.3817	52.4676	1.64416	1.64213	5.11389	5.04789	6.43152	6.58063	14.736	14.6799	19.7719	20.0793	35.6818	35.5519	51.7667	50.9475
120.548	2.29309	2.26702	6.50403	6.39427	7.13245	7.28534	16.0192	15.8701	21.1959	21.3893	38.4108	38.0426	53.4132	52.5012	1.64807	1.64381	5.1156	5.05216	6.43542	6.58627	14.7408	14.6917	19.7836	20.0957	35.7015	35.5782	51.7841	50.9803
120.648	2.29382	2.269	6.49915	6.39941	7.13318	7.29153	16.0236	15.8827	21.2106	21.4068	38.4408	38.0698	53.4393	52.5348	1.64929	1.64548	5.12659	5.05644	6.44836	6.59191	14.7402	14.7034	19.8002	20.1122	35.7198	35.6044	51.8202	51.013
120.748	2.28149	2.27098	6.49609	6.40455	7.14038	7.29771	16.0466	15.8952	21.229	21.4243	38.4656	38.0969	53.4814	52.5684	1.63086	1.64716	5.11792	5.06071	6.44531	6.59755	14.7563	14.7151	19.811	20.1286	35.7424	35.6307	51.8428	51.0457
120.848	2.28979	2.27296	6.5105	6.4097	7.14502	7.3039	16.063	15.9078	21.2551	21.4418	38.4993	38.1241	53.5234	52.6019	1.64111	1.64883	5.13232	5.06498	6.4541	6.60318	14.776	14.7269	19.8335	20.1451	35.7764	35.657	51.8884	51.0784
120.948	2.29211	2.27494	6.51477	6.41484	7.14685	7.31008	16.0746	15.9203	21.2653	21.4593	38.5309	38.1513	53.5607	52.6355	1.64539	1.65051	5.14026	5.06925	6.45789	6.60882	14.7839	14.7386	19.8373	20.1615	35.8077	35.6833	51.9237	51.1111
121.048	2.28833	2.27692	6.51465	6.41997	7.14722	7.31627	16.0923	15.9329	21.2866	21.4768	38.5466	38.1784	53.5881	52.669	1.64526	1.65218	5.14062	5.07352	6.44849	6.61445	14.7936	14.7503	19.8511	20.1779	35.8296	35.7095	51.9492	51.1438
121.148	2.2804	2.2789	6.51086	6.42511	7.15662	7.32245	16.1002	15.9454	21.2965	21.4943	38.5699	38.2056	53.6171	52.7026	1.63367	1.65385	5.13049	5.07779	6.45789	6.62008	14.8104	14.7621	19.8646	20.1943	35.8546	35.7358	51.9823	51.1764
121.248	2.28699	2.28087	6.51746	6.43025	7.1637	7.32863	16.109	15.958	21.3129	21.5118	38.5941	38.2327	53.6669	52.7361	1.64026	1.65552	5.12952	5.08206	6.46863	6.62571	14.813	14.7738	19.8871	20.2108	35.8849	35.762	52.0126	51.2091
121.348	2.28223	2.28285	6.52051	6.43539	7.16626	7.33481	16.1233	15.9705	21.3335	21.5293	38.6265	38.2598	53.6992	52.7696	1.64331	1.6572	5.13623	5.08633	6.45801	6.63134	14.8221	14.7855	19.896	20.2272	35.9033	35.7883	52.0525	51.2417
121.448	2.28894	2.28483	6.52917	6.44053	7.17542	7.34099	16.1439	15.9831	21.3617	21.5467	38.6625	38.287	53.7352	52.8031	1.63831	1.65887	5.14539	5.09059	6.47278	6.63697	14.8345	14.7973	19.9164	20.2436	35.932	35.8145	52.0966	51.2743
121.548	2.29004	2.28681	6.53223	6.44566	7.18384	7.34717	16.1531	15.9956	21.3726	21.5642	38.689	38.3141	53.7695	52.8365	1.64502	1.66054	5.1438	5.09486	6.47534	6.64259	14.8446	14.809	19.9309	20.26	35.9521	35.8407	52.1306	51.3069
121.648	2.29382	2.28878	6.53406	6.4508	7.18616	7.35334	16.1549	16.0081	21.3939	21.5817	38.7067	38.3412	53.8104	52.87	1.64148	1.66221	5.14612	5.09913	6.47156	6.64822	14.8502	14.8207	19.9506	20.2764	35.9796	35.867	52.1581	51.3395
121.748	2.29993	2.29076	6.55554	6.45593	7.18616	7.35952	16.1703	16.0207	21.4215	21.5992	38.7318	38.3683	53.8458	52.9034	1.64514	1.66388	5.15588	5.10339	6.48743	6.65384	14.8514	14.8324	19.9645	20.2928	36.0052	35.8932	52.2028	51.3721
121.848	2.29504	2.29274	6.55676	6.46107	7.18127	7.36569	16.1774	16.0332	21.4301	21.6166	38.7526	38.3954	53.8856	52.9368	1.65002	1.66555	5.16077	5.10766	6.48816	6.65946	14.8649	14.8441	19.9633	20.3092	36.0275	35.9194	52.2394	51.4047
121.948	2.29309	2.29471	6.55481	6.4662	7.17932	7.37186	16.1927	16.0457	21.4537	21.6341	38.7855	38.4225	53.921	52.9703	1.65979	1.66722	5.15686	5.11192	6.49597	6.66508	14.8679	14.8559	19.9828	20.3256	36.0548	35.9456	52.2626	51.4372
122.048	2.29199	2.29669	6.55176	6.47133	7.17822	7.37803	16.2039	16.0583	21.4587	21.6516	38.8081	38.4496	53.957	53.0037	1.65112	1.66889	5.1521	5.11618	6.49902	6.6707	14.8749	14.8676	20.0032	20.342	36.062	35.9718	52.2893	51.4697
122.148	2.28308	2.29866	6.55457	6.47647	7.18909	7.3842	16.2047	16.0708	21.4713	21.669	38.8346	38.4767	53.9911	53.037	1.64832	1.67056	5.15491	5.12044	6.49817	6.67632	14.8961	14.8793	20.0143	20.3584	36.0802	35.998	52.3058	51.5023
122.248	2.30481	2.30064	6.56653	6.4816	7.19861	7.39037	16.226	16.0833	21.4982	21.6865	38.8676	38.5038	54.0304	53.0704	1.65979	1.67223	5.15881	5.1247	6.50159	6.68194	14.9	14.891	20.0453	20.3747	36.1075	36.0242	52.3483	51.5348
122.348	2.29895	2.30261	6.56433	6.48673	7.1969	7.39654	16.2377	16.0958	21.5104	21.7039	38.8932	38.5309	54.0594	53.1038	1.66003	1.6739	5.16467	5.12897	6.5177	6.68755	14.9147	14.9027	20.0609	20.3911	36.131	36.0503	52.3722	51.5672
122.448	2.29407	2.30458	6.56921	6.49186	7.19202	7.40271	16.2389	16.1083	21.5172	21.7214	38.9078	38.5579	54.09	53.1371	1.65881	1.67557	5.16174	5.13323	6.51038	6.69316	14.9205	14.9144	20.0602	20.4075	36.1517	36.0765	52.4042	51.5997
122.548	2.29016	2.30656	6.57141	6.49699	7.18811	7.40887	16.2504	16.1209	21.5267	21.7388	38.9408	38.585	54.1229	53.1704	1.65124	1.67724	5.1676	5.13748	6.51672	6.69878	14.9371	14.9261	20.0758	20.4239	36.1632	36.1027	52.4413	51.6322
122.648	2.29089	2.30853	6.56653	6.50212	7.20056	7.41503	16.2631	16.1334	21.5397	21.7562	38.9615	38.6121	54.1571	53.2038	1.65198	1.6789	5.16077	5.14174	6.52917	6.70439	14.9413	14.9378	20.0765	20.4402	36.1954	36.1288	52.4657	51.6646
122.748	2.28333	2.3105	6.57019	6.50724	7.21252	7.42119	16.2789	16.1459	21.5609	21.7737	38.9713	38.6391	54.1808	53.2371	1.65613	1.68057	5.16858	5.146	6.52527	6.71	14.9576	14.9495	20.0922	20.4566	36.215	36.155	52.5089	51.697
122.848	2.28796	2.31248	6.58874	6.51237	7.2135	7.42735	16.2972	16.1584	21.5739	21.7911	38.9955	38.6661	54.2167	53.2703	1.64905	1.68224	5.17566	5.15026	6.54211	6.71561	14.9703	14.9612	20.1146	20.4729	36.2452	36.1811	52.5331	51.7294
122.948	2.28723	2.31445	6.58801	6.5175	7.21228	7.43351	16.3063	16.1709	21.5863	21.8085	39.026	38.6932	54.2472	53.3036	1.65393	1.68391	5.16663	5.15451	6.54285	6.72121	14.9813	14.9729	20.1276	20.4893	36.266	36.2073	52.5692	51.7618
123.048	2.29773	2.31642	6.59851	6.52263	7.23865	7.43967	16.3265	16.1834	21.6168	21.826	39.0638	38.7202	54.285	53.3369	1.66492	1.68557	5.18127	5.15877	6.55383	6.72682	14.9918	14.9846	20.1361	20.5057	36.2919	36.2334	52.5997	51.7942
123.148	2.29895	2.31839	6.59973	6.52775	7.23987	7.44583	16.3336	16.1959	21.6315	21.8434	39.0883	38.7473	54.3212	53.3701	1.66003	1.68724	5.18005	5.16302	6.55261	6.73242	14.9957	14.9963	20.1488	20.522	36.3168	36.2595	52.618	51.8266
123.248	2.29675	2.32036	6.59753	6.53288	7.23767	7.45198	16.3334	16.2085	21.6373	21.8608	39.1117	38.7743	54.3507	53.4033	1.65784	1.6889	5.18445	5.16728	6.55652	6.73803	15.0048	15.008	20.1664	20.5383	36.3361	36.2856	52.6415	51.8589
123.348	2.29602	2.32233	6.5968	6.538	7.24255	7.45814	16.35	16.221	21.6439	21.8782	39.1442	38.8013	54.3788	53.4366	1.6571	1.69057	5.18518	5.17153	6.54968	6.74363	15.0083	15.0196	20.1713	20.5547	36.3605	36.3118	52.6796	51.8913
123.448	2.29175	2.3243	6.60034	6.54313	7.25439	7.46429	16.3521	16.2335	21.6655	21.8956	39.1672	38.8283	54.4141	53.4698	1.66064	1.69224	5.18506	5.17578	6.55737	6.74923	15.0328	15.0313	20.1812	20.571	36.3743	36.3379	52.7185	51.9236
123.548	2.29529	2.32627	6.61316	6.54825	7.26306	7.47044	16.3746	16.246	21.6859	21.913	39.1996	38.8553	54.4562	53.5029	1.6676	1.6939	5.19788	5.18004	6.56653	6.75483	15.0399	15.043	20.2015	20.5874	36.4025	36.364	52.7509	51.9559
123.648	2.28992	2.32824	6.61243	6.55337	7.26428	7.47659	16.3754	16.2585	21.7067	21.9305	39.2184	38.8823	54.4862	53.5361	1.67249	1.69556	5.19104	5.18429	6.56726	6.76042	15.0486	15.0547	20.2106	20.6037	36.4269	36.3901	52.7794	51.9882
123.748	2.29907	2.33021	6.62109	6.55849	7.27905	7.48274	16.4077	16.271	21.7214	21.9479	39.2527	38.9093	54.5381	53.5693	1.67969	1.69723	5.20386	5.18854	6.58008	6.76602	15.0649	15.0664	20.229	20.62	36.4458	36.4161	52.8174	52.0205
123.848	2.29956	2.33218	6.62207	6.56361	7.27759	7.48889	16.4067	16.2834	21.7297	21.9653	39.2727	38.9363	54.5703	53.6024	1.67456	1.69889	5.19678	5.19279	6.58472	6.77162	15.0769	15.078	20.2415	20.6363	36.4658	36.4422	52.8359	52.0527
123.948	2.30005	2.33415	6.62012	6.56873	7.27612	7.49503	16.4185	16.2959	21.7419	21.9827	39.2849	38.9633	54.6038	53.6355	1.67456	1.70056	5.20093	5.19704	6.58521	6.77721	15.0868	15.0897	20.2537	20.6526	36.4895	36.4683	52.8672	52.085
124.048	2.29578	2.33612	6.62195	6.57385	7.26819	7.50118	16.4244	16.3084	21.7572	22	39.3082	38.9902	54.619	53.6687	1.66101	1.70222	5.1969	5.20129	6.58093	6.7828	15.0981	15.1014	20.2667	20.669	36.5109	36.4944	52.9003	52.1172
124.148	2.31323	2.33809	6.63574	6.57897	7.27588	7.50732	16.4475	16.3209	21.7808	22.0174	39.3469	39.0172	54.6621	53.7018	1.68408	1.70388	5.21435	5.20553	6.59839	6.78839	15.1094	15.1131	20.2925	20.6853	36.5442	36.5204	52.9451	52.1494
124.248	2.3147	2.34005	6.63672	6.58409	7.27686	7.51346	16.4548	16.3334	21.7896	22.0348	39.3716	39.0442	54.6943	53.7348	1.67188	1.70554	5.21948	5.20978	6.60352	6.79398	15.1177	15.1247	20.2935	20.7016	36.5627	36.5465	52.9697	52.1816
124.348	2.31323	2.34202	6.6377	6.58921	7.27783	7.51961	16.4614	16.3459	21.8059	22.0522	39.3921	39.0711	54.7148	53.7679	1.67236	1.70721	5.2124	5.21403	6.61987	6.79957	15.1327	15.1364	20.3176	20.7179	36.5869	36.5725	53.0056	52.2138
124.448	2.31457	2.34399	6.63855	6.59433	7.28284	7.52575	16.472	16.3584	21.8151	22.0696	39.4164	39.0981	54.7511	53.801	1.67566	1.70887	5.21374	5.21827	6.61145	6.80516	15.1449	15.1481	20.3307	20.7342	36.6075	36.5986	53.0341	52.246
124.548	2.31531	2.34595	6.63782	6.59944	7.28162	7.53188	16.4906	16.3709	21.8219	22.087	39.443	39.125	54.7831	53.834	1.6825	1.71053	5.21033	5.22252	6.61585	6.81074	15.1718	15.1597	20.3392	20.7505	36.632	36.6246	53.0702	52.2781
124.648	2.32629	2.34792	6.66003	6.60456	7.29065	7.53802	16.5052	16.3833	21.8402	22.1043	39.473	39.152	54.8214	53.867	1.69104	1.71219	5.23108	5.22676	6.6427	6.81633	15.1725	15.1714	20.3656	20.7668	36.6605	36.6506	53.0988	52.3103
124.748	2.32507	2.34989	6.66492	6.60968	7.28577	7.54416	16.5123	16.3958	21.8531	22.1217	39.4938	39.1789	54.8514	53.9001	1.69031	1.71385	5.23596	5.231	6.64343	6.82191	15.1852	15.183	20.3822	20.783	36.6808	36.6767	53.1251	52.3424
124.848	2.32434	2.35185	6.6698	6.61479	7.29822	7.55029	16.5248	16.4083	21.8678	22.1391	39.5258	39.2058	54.8898	53.9331	1.69104	1.71551	5.23474	5.23525	6.64465	6.82749	15.1884	15.1947	20.3912	20.7993	36.7015	36.7027	53.1454	52.3745
124.948	2.31165	2.35382	6.67493	6.61991	7.30334	7.55642	16.5453	16.4208	21.8705	22.1564	39.5504	39.2328	54.9257	53.966	1.68445	1.71717	5.24963	5.23949	6.63562	6.83307	15.2067	15.2063	20.4113	20.8156	36.7201	36.7287	53.1815	52.4066
125.048	2.31824	2.35578	6.67956	6.62502	7.30798	7.56256	16.5638	16.4332	21.8951	22.1738	39.5746	39.2597	54.9718	53.999	1.68909	1.71883	5.25476	5.24373	6.65808	6.83865	15.2147	15.218	20.4303	20.8319	36.7538	36.7547	53.2179	52.4387
125.148	2.31848	2.35775	6.67786	6.63013	7.31409	7.56869	16.5758	16.4457	21.9144	22.1912	39.5963	39.2866	54.9972	54.032	1.68738	1.72049	5.2467	5.24797	6.65833	6.84423	15.2194	15.2296	20.4398	20.8482	36.766	36.7807	53.2489	52.4708
125.248	2.31946	2.35971	6.67883	6.63524	7.32068	7.57482	16.5846	16.4582	21.9332	22.2085	39.6224	39.3135	55.0214	54.0649	1.69397	1.72215	5.25378	5.25221	6.66296	6.8498	15.2388	15.2413	20.4528	20.8644	36.7902	36.8067	53.2792	52.5028
125.348	2.32104	2.36167	6.68237	6.64036	7.32471	7.58094	16.5979	16.4707	21.9426	22.2259	39.646	39.3404	55.0625	54.0978	1.68628	1.72381	5.24365	5.25645	6.67065	6.85538	15.2577	15.2529	20.468	20.8807	36.8174	36.8327	53.3064	52.5349
125.448	2.32629	2.36364	6.68958	6.64547	7.32947	7.58707	16.6088	16.4831	21.9596	22.2432	39.6781	39.3673	55.1083	54.1308	1.68738	1.72547	5.25452	5.26069	6.68152	6.86095	15.2682	15.2646	20.483	20.8969	36.8363	36.8586	53.3505	52.5669
125.548	2.32532	2.3656	6.70398	6.65058	7.33264	7.5932	16.6217	16.4956	21.9838	22.2605	39.693	39.3941	55.1447	54.1636	1.69202	1.72713	5.25549	5.26492	6.69031	6.86652	15.2712	15.2762	20.4994	20.9132	36.8605	36.8846	53.3788	52.5989
125.648	2.32422	2.36756	6.70142	6.65569	7.33765	7.59932	16.6323	16.508	21.9832	22.2779	39.7175	39.421	55.1807	54.1965	1.68359	1.72878	5.25854	5.26916	6.69531	6.87209	15.2839	15.2878	20.5105	20.9295	36.8831	36.9106	53.4075	52.6309
125.748	2.3252	2.36952	6.7019	6.66079	7.33814	7.60544	16.6487	16.5205	21.9976	22.2952	39.7454	39.4479	55.2109	54.2294	1.67847	1.73044	5.25708	5.2734	6.69629	6.87766	15.3043	15.2995	20.5168	20.9457	36.9016	36.9365	53.4275	52.6628
125.848	2.33972	2.37149	6.71692	6.6659	7.35315	7.61156	16.6696	16.533	22.0182	22.3126	39.7916	39.4748	55.2567	54.2623	1.69104	1.7321	5.28186	5.27763	6.70886	6.88323	15.3092	15.3111	20.5472	20.962	36.9357	36.9625	53.4735	52.6948
125.948	2.34094	2.37345	6.71765	6.67101	7.34827	7.61768	16.6703	16.5454	22.0267	22.3299	39.818	39.5016	55.297	54.2951	1.69031	1.73376	5.28674	5.28187	6.71375	6.8888	15.325	15.3227	20.5521	20.9782	36.9601	36.9884	53.4979	52.7268
126.048	2.34253	2.37541	6.72168	6.67612	7.36353	7.6238	16.686	16.5579	22.0461	22.3472	39.8391	39.5285	55.3318	54.3279	1.68823	1.73541	5.28271	5.2861	6.72144	6.89436	15.3395	15.3344	20.5676	20.9944	36.999	37.0143	53.5332	52.7587
126.148	2.34778	2.37737	6.72278	6.68122	7.37073	7.62992	16.6986	16.5703	22.0709	22.3645	39.8695	39.5553	55.3663	54.3607	1.69495	1.73707	5.28577	5.29033	6.7323	6.89993	15.3666	15.346	20.5865	21.0107	37.0258	37.0403	53.5692	52.7906
126.248	2.35339	2.37933	6.73621	6.68633	7.38	7.63604	16.7257	16.5828	22.0883	22.3818	39.9008	39.5822	55.4069	54.3935	1.71033	1.73872	5.30115	5.29457	6.74402	6.90549	15.3682	15.3576	20.5958	21.0269	37.0468	37.0662	53.6158	52.8225
126.348	2.35645	2.38129	6.7373	6.69143	7.3894	7.64215	16.7292	16.5952	22.0935	22.3992	39.9331	39.609	55.4453	54.4263	1.7002	1.74038	5.30835	5.2988	6.74512	6.91105	15.3746	15.3692	20.6108	21.0431	37.0852	37.0921	53.6426	52.8544
126.448	2.3634	2.38325	6.74231	6.69654	7.39026	7.64827	16.7379	16.6077	22.1139	22.4165	39.9633	39.6358	55.4833	54.4591	1.69885	1.74203	5.30725	5.30303	6.75574	6.91661	15.3876	15.3809	20.6295	21.0593	37.1195	37.118	53.6727	52.8862
126.548	2.36218	2.38521	6.73743	6.70164	7.39099	7.65438	16.7484	16.6201	22.1207	22.4338	39.984	39.6627	55.5255	54.4918	1.70007	1.74369	5.31409	5.30726	6.76062	6.92217	15.401	15.3925	20.6283	21.0756	37.13	37.1439	53.7069	52.9181
126.648	2.36829	2.38717	6.73938	6.70675	7.39905	7.66049	16.7623	16.6326	22.1361	22.4511	40.0172	39.6895	55.5604	54.5246	1.70569	1.74534	5.32581	5.31149	6.76672	6.92773	15.4176	15.4041	20.6478	21.0918	37.1613	37.1698	53.7499	52.9499
126.748	2.3634	2.38913	6.75183	6.71185	7.39417	7.6666	16.7748	16.645	22.1605	22.4684	40.0453	39.7163	55.6046	54.5573	1.69324	1.747	5.32288	5.31572	6.76746	6.93328	15.4257	15.4157	20.6608	21.108	37.182	37.1957	53.7743	52.9818
126.848	2.35754	2.39109	6.75208	6.71695	7.40369	7.67271	16.7867	16.6574	22.1705	22.4857	40.0651	39.7431	55.6261	54.59	1.69299	1.74865	5.31506	5.31995	6.77332	6.93884	15.4441	15.4273	20.6722	21.1242	37.2013	37.2216	53.7977	53.0136
126.948	2.3606	2.39304	6.75513	6.72205	7.42432	7.67881	16.8013	16.6699	22.1853	22.503	40.103	39.7699	55.6682	54.6227	1.70215	1.75031	5.32788	5.32417	6.78613	6.94439	15.4441	15.4389	20.6929	21.1404	37.2336	37.2475	53.8362	53.0454
127.048	2.36206	2.395	6.76245	6.72715	7.42627	7.68492	16.8069	16.6823	22.1946	22.5203	40.1226	39.7967	55.7107	54.6554	1.70361	1.75196	5.32983	5.3284	6.79175	6.94994	15.4547	15.4505	20.6929	21.1566	37.2588	37.2734	53.8689	53.0771
127.148	2.36536	2.39696	6.76379	6.73225	7.42346	7.69102	16.8219	16.6947	22.2174	22.5376	40.1566	39.8235	55.7394	54.688	1.70691	1.75361	5.33069	5.33263	6.79504	6.95549	15.4706	15.4622	20.7074	21.1728	37.2816	37.2992	53.8954	53.1089
127.248	2.3634	2.39892	6.77356	6.73735	7.43689	7.69713	16.8278	16.7072	22.2272	22.5549	40.1803	39.8503	55.7743	54.7207	1.70081	1.75526	5.33069	5.33685	6.79675	6.96104	15.4871	15.4738	20.7194	21.189	37.3068	37.3251	53.9227	53.1407
127.348	2.36401	2.40087	6.77051	6.74245	7.43799	7.70323	16.842	16.7196	22.2356	22.5721	40.2004	39.877	55.8086	54.7533	1.70752	1.75692	5.3374	5.34108	6.80566	6.96659	15.4985	15.4854	20.7317	21.2052	37.3408	37.3509	53.9607	53.1724
127.448	2.37036	2.40283	6.78052	6.74755	7.4458	7.70933	16.8618	16.732	22.2537	22.5894	40.2263	39.9038	55.8303	54.786	1.7041	1.75857	5.33765	5.3453	6.81348	6.97214	15.5214	15.497	20.7437	21.2214	37.3608	37.3768	54	53.2041
127.548	2.36902	2.40478	6.77917	6.75265	7.45056	7.71543	16.8707	16.7445	22.2662	22.6067	40.2562	39.9306	55.8661	54.8186	1.70081	1.76022	5.34607	5.34952	6.81262	6.97768	15.5194	15.5086	20.7543	21.2375	37.3771	37.4026	54.036	53.2358
127.648	2.37317	2.40674	6.78333	6.75774	7.45837	7.72153	16.8688	16.7569	22.2816	22.624	40.2916	39.9573	55.8995	54.8512	1.70862	1.76187	5.35437	5.35375	6.81433	6.98323	15.5341	15.5202	20.7738	21.2537	37.3988	37.4284	54.0634	53.2675
127.748	2.36829	2.4087	6.79016	6.76284	7.46546	7.72762	16.8834	16.7693	22.2943	22.6412	40.3063	39.9841	55.9393	54.8837	1.70984	1.76352	5.3551	5.35797	6.81921	6.98877	15.5435	15.5317	20.7924	21.2699	37.4191	37.4543	54.0939	53.2992
127.848	2.37573	2.41065	6.79761	6.76793	7.48657	7.73372	16.8872	16.7817	22.3196	22.6585	40.3411	40.0108	55.9805	54.9163	1.70947	1.76517	5.36865	5.36219	6.8291	6.99431	15.5585	15.5433	20.8101	21.2861	37.4485	37.4801	54.1228	53.3308
127.948	2.37708	2.4126	6.79895	6.77303	7.48987	7.73981	16.9017	16.7941	22.3307	22.6758	40.3658	40.0376	56.005	54.9488	1.71863	1.76682	5.36389	5.36641	6.83191	6.99985	15.5649	15.5549	20.8226	21.3022	37.4745	37.5059	54.1573	53.3624
128.048	2.37769	2.41456	6.80176	6.77812	7.49634	7.74591	16.9221	16.8066	22.3452	22.693	40.3938	40.0643	56.0405	54.9814	1.71924	1.76847	5.37646	5.37063	6.84448	7.00539	15.5741	15.5665	20.8467	21.3184	37.511	37.5317	54.1833	53.3941
128.148	2.38098	2.41651	6.80457	6.78322	7.49768	7.752	16.9352	16.819	22.3676	22.7103	40.4244	40.091	56.087	55.0139	1.71448	1.77012	5.38342	5.37485	6.85144	7.01092	15.5905	15.5781	20.8658	21.3345	37.5333	37.5575	54.2098	53.4257
128.248	2.38	2.41847	6.8175	6.78831	7.4967	7.75809	16.9476	16.8314	22.3844	22.7275	40.4506	40.1178	56.1134	55.0464	1.71765	1.77177	5.39001	5.37907	6.85657	7.01646	15.6023	15.5897	20.8705	21.3507	37.5499	37.5833	54.2499	53.4573
128.348	2.38354	2.42042	6.81543	6.7934	7.50024	7.76418	16.9634	16.8438	22.3938	22.7448	40.4778	40.1445	56.1482	55.0789	1.72119	1.77342	5.40381	5.38328	6.85815	7.02199	15.6094	15.6013	20.894	21.3668	37.5833	37.6091	54.2849	53.4888
128.448	2.38501	2.42237	6.82251	6.79849	7.51709	7.77027	16.9783	16.8562	22.4128	22.762	40.4988	40.1712	56.1809	55.1114	1.72266	1.77507	5.40894	5.3875	6.86328	7.02753	15.6177	15.6128	20.8931	21.383	37.6038	37.6348	54.3115	53.5204
128.548	2.39331	2.42432	6.83276	6.80358	7.53149	7.77635	16.9946	16.8686	22.4292	22.7793	40.5229	40.1979	56.2246	55.1438	1.72119	1.77672	5.41162	5.39171	6.87402	7.03306	15.6394	15.6244	20.927	21.3991	37.634	37.6606	54.3535	53.552
128.648	2.40332	2.42628	6.84473	6.80867	7.55127	7.78244	17.0083	16.881	22.4485	22.7965	40.5601	40.2246	56.2617	55.1763	1.73682	1.77836	5.42358	5.39593	6.88354	7.03859	15.6472	15.636	20.9426	21.4153	37.6631	37.6864	54.3943	53.5835
128.748	2.3916	2.42823	6.84277	6.81376	7.53784	7.78852	17.0181	16.8934	22.4607	22.8137	40.5818	40.2513	56.2871	55.2087	1.74097	1.78001	5.42163	5.40014	6.8877	7.04412	15.6571	15.6476	20.9585	21.4314	37.6812	37.7121	54.418	53.615
128.848	2.38977	2.43018	6.85071	6.81885	7.53772	7.7946	17.0338	16.9058	22.4816	22.831	40.599	40.278	56.3263	55.2411	1.73132	1.78166	5.41565	5.40436	6.90125	7.04964	15.661	15.6591	20.9701	21.4475	37.7023	37.7379	54.4552	53.6465
128.948	2.38586	2.43213	6.8468	6.82394	7.53381	7.80068	17.0299	16.9182	22.4996	22.8482	40.6207	40.3046	56.3419	55.2735	1.72742	1.7833	5.42151	5.40857	6.9071	7.05517	15.6754	15.6707	20.984	21.4637	37.7277	37.7636	54.4745	53.678
129.048	2.38855	2.43408	6.85925	6.82903	7.53284	7.80676	17.0424	16.9306	22.5101	22.8654	40.6469	40.3313	56.3856	55.3059	1.7301	1.78495	5.4303	5.41278	6.90051	7.0607	15.6804	15.6823	20.9945	21.4798	37.756	37.7894	54.4972	53.7094
129.148	2.39355	2.43603	6.86987	6.83411	7.53369	7.81284	17.061	16.943	22.5403	22.8826	40.6597	40.358	56.4238	55.3383	1.729	1.7866	5.43726	5.417	6.9187	7.06622	15.6969	15.6938	21.0112	21.4959	37.7825	37.8151	54.5176	53.7409
129.248	2.40222	2.43798	6.87707	6.8392	7.5404	7.81892	17.0756	16.9554	22.5612	22.8998	40.694	40.3846	56.4542	55.3706	1.74182	1.78824	5.4342	5.42121	6.93152	7.07174	15.7098	15.7054	21.0199	21.512	37.8143	37.8408	54.5497	53.7723
129.348	2.40344	2.43993	6.87781	6.84429	7.54529	7.82499	17.0865	16.9678	22.5641	22.9171	40.7142	40.4113	56.4843	55.403	1.7467	1.78989	5.43909	5.42542	6.93079	7.07726	15.7134	15.717	21.0326	21.5281	37.8392	37.8665	54.5819	53.8038
129.448	2.40137	2.44188	6.89355	6.84937	7.54932	7.83107	17.1018	16.9802	22.5793	22.9343	40.7532	40.4379	56.5115	55.4353	1.74292	1.79153	5.44116	5.42963	6.93433	7.08278	15.7321	15.7285	21.0464	21.5442	37.8623	37.8922	54.6208	53.8352
129.548	2.39856	2.44383	6.89075	6.85446	7.55212	7.83714	17.1129	16.9926	22.5941	22.9515	40.774	40.4646	56.546	55.4676	1.74011	1.79318	5.43616	5.43383	6.93762	7.0883	15.745	15.7401	21.057	21.5603	37.8888	37.918	54.6437	53.8666
129.648	2.4032	2.44578	6.89954	6.85954	7.5592	7.84321	17.1256	17.005	22.611	22.9687	40.8024	40.4912	56.5861	55.4999	1.74475	1.79482	5.4469	5.43804	6.94226	7.09382	15.7485	15.7516	21.0758	21.5764	37.9056	37.9437	54.6678	53.8979
129.748	2.40527	2.44773	6.90112	6.86462	7.57251	7.84928	17.1313	17.0174	22.6284	22.9859	40.8293	40.5178	56.6189	55.5322	1.74072	1.79647	5.44898	5.44225	6.94434	7.09933	15.7712	15.7632	21.0774	21.5925	37.9231	37.9693	54.7068	53.9293
129.848	2.41211	2.44967	6.91821	6.8697	7.59131	7.85535	17.1499	17.0297	22.6414	23.0031	40.864	40.5445	56.6516	55.5644	1.74805	1.79811	5.44409	5.44646	6.95117	7.10485	15.7753	15.7747	21.0945	21.6086	37.9495	37.995	54.7471	53.9606
129.948	2.41028	2.45162	6.91589	6.87479	7.58948	7.86142	17.1559	17.0421	22.6469	23.0203	40.8678	40.5711	56.6749	55.5967	1.73792	1.79975	5.44592	5.45066	6.94934	7.11036	15.7876	15.7863	21.1	21.6247	37.9708	38.0207	54.7723	53.992
130.048	2.42261	2.45357	6.92871	6.87987	7.59985	7.86749	17.178	17.0545	22.675	23.0375	40.8977	40.5977	56.7185	55.6289	1.75439	1.8014	5.45459	5.45487	6.96753	7.11587	15.8026	15.7978	21.1282	21.6408	38.0068	38.0464	54.8105	54.0233
130.148	2.42175	2.45551	6.9259	6.88495	7.61292	7.87355	17.1871	17.0669	22.6842	23.0546	40.9381	40.6243	56.7413	55.6611	1.75574	1.80304	5.44983	5.45907	6.96887	7.12138	15.8071	15.8094	21.1429	21.6569	38.0336	38.072	54.8329	54.0546
130.248	2.42676	2.45746	6.92676	6.89003	7.61938	7.87962	17.1997	17.0793	22.7085	23.0718	40.9641	40.6509	56.7791	55.6933	1.76221	1.80468	5.46606	5.46327	6.96753	7.12689	15.8154	15.8209	21.1499	21.673	38.0459	38.0977	54.8748	54.0859
130.348	2.42309	2.45941	6.93091	6.89511	7.62183	7.88568	17.2134	17.0916	22.7183	23.089	40.9978	40.6775	56.8125	55.7255	1.76831	1.80633	5.47827	5.46748	6.97363	7.1324	15.8258	15.8324	21.1672	21.689	38.0833	38.1233	54.8948	54.1171
130.448	2.42175	2.46135	6.92761	6.90019	7.61853	7.89174	17.2203	17.104	22.7291	23.1062	41.0104	40.7041	56.8527	55.7577	1.7594	1.80797	5.47546	5.47168	6.97644	7.1379	15.8319	15.844	21.1761	21.7051	38.1019	38.149	54.9247	54.1484
130.548	2.42786	2.4633	6.93176	6.90526	7.62268	7.8978	17.2357	17.1164	22.7406	23.1234	41.0355	40.7306	56.88	55.7899	1.7655	1.80961	5.46936	5.47588	6.98254	7.14341	15.8385	15.8555	21.1937	21.7212	38.1097	38.1746	54.954	54.1796
130.648	2.42664	2.46524	6.94421	6.91034	7.63123	7.90386	17.2484	17.1287	22.7516	23.1405	41.0599	40.7572	56.9064	55.822	1.76428	1.81125	5.47058	5.48008	6.98328	7.14891	15.8551	15.867	21.2103	21.7372	38.1339	38.2002	54.9901	54.2108
130.748	2.41419	2.46719	6.94544	6.91542	7.63245	7.90992	17.2614	17.1411	22.7601	23.1577	41.0787	40.7838	56.9384	55.8541	1.76917	1.81289	5.46155	5.48428	6.9845	7.15441	15.8563	15.8786	21.2233	21.7533	38.1583	38.2259	55.0187	54.242
130.848	2.42102	2.46913	6.94055	6.92049	7.63123	7.91597	17.2643	17.1535	22.7731	23.1749	41.1051	40.8103	56.9591	55.8863	1.776	1.81453	5.46643	5.48848	6.98328	7.15991	15.8716	15.8901	21.2299	21.7693	38.1827	38.2515	55.0543	54.2732
130.948	2.42456	2.47108	6.94409	6.92557	7.6333	7.92203	17.2739	17.1658	22.7942	23.192	41.1282	40.8369	56.988	55.9184	1.77197	1.81617	5.4624	5.49268	6.99097	7.16541	15.8838	15.9016	21.2437	21.7854	38.21	38.2771	55.0938	54.3044
131.048	2.42896	2.47302	6.95996	6.93064	7.63721	7.92808	17.2839	17.1782	22.8083	23.2092	41.1638	40.8634	57.0334	55.9504	1.77441	1.81781	5.47046	5.49688	6.99536	7.17091	15.8931	15.9131	21.2554	21.8014	38.2202	38.3027	55.1116	54.3355
131.148	2.42651	2.47496	6.95801	6.93572	7.64893	7.93414	17.2856	17.1906	22.8157	23.2263	41.1809	40.89	57.0547	55.9825	1.77393	1.81945	5.47046	5.50107	6.99292	7.17641	15.9165	15.9247	21.2727	21.8175	38.2432	38.3283	55.1306	54.3667
131.248	2.43652	2.4769	6.96948	6.94079	7.65478	7.94019	17.3069	17.2029	22.8394	23.2435	41.2104	40.9165	57.0801	56.0146	1.78174	1.82109	5.47412	5.50527	7.00293	7.1819	15.9266	15.9362	21.2961	21.8335	38.2825	38.3539	55.1775	54.3978
131.348	2.42883	2.47885	6.99133	6.94586	7.66443	7.94624	17.3229	17.2153	22.8568	23.2606	41.2457	40.9431	57.121	56.0466	1.78992	1.82273	5.48791	5.50947	7.01257	7.18739	15.9316	15.9477	21.3217	21.8496	38.3019	38.3795	55.2108	54.4289
131.448	2.42212	2.48079	6.98828	6.95093	7.66748	7.95228	17.3279	17.2276	22.8679	23.2778	41.2759	40.9696	57.1516	56.0786	1.78882	1.82437	5.47925	5.51366	7.01196	7.19289	15.938	15.9592	21.3325	21.8656	38.3188	38.405	55.2334	54.46
131.548	2.42261	2.48273	6.99902	6.95601	7.6665	7.95833	17.3362	17.24	22.886	23.2949	41.3042	40.9961	57.1738	56.1107	1.78979	1.82601	5.48389	5.51786	7.0105	7.19838	15.9587	15.9707	21.3489	21.8816	38.3389	38.4306	55.2576	54.4911
131.648	2.43164	2.48467	6.99829	6.96108	7.67358	7.96438	17.3533	17.2523	22.9028	23.312	41.3188	41.0226	57.2043	56.1426	1.79272	1.82764	5.49292	5.52205	7.01953	7.20387	15.9597	15.9822	21.3542	21.8976	38.3596	38.4562	55.2979	54.5221
131.748	2.43067	2.48661	7.00659	6.96615	7.66846	7.97042	17.3481	17.2647	22.9155	23.3292	41.3452	41.0491	57.2341	56.1746	1.79736	1.82928	5.4939	5.52624	7.02051	7.20936	15.9647	15.9938	21.3645	21.9137	38.3782	38.4817	55.3298	54.5532
131.848	2.42786	2.48855	7.00989	6.97122	7.67737	7.97646	17.3531	17.277	22.9281	23.3463	41.3597	41.0756	57.2628	56.2066	1.80066	1.83092	5.48694	5.53043	7.02332	7.21484	15.9752	16.0053	21.3793	21.9297	38.4005	38.5073	55.3644	54.5842
131.948	2.42297	2.49049	7.00867	6.97628	7.6781	7.98251	17.36	17.2893	22.9352	23.3634	41.3922	41.1021	57.3009	56.2385	1.79333	1.83256	5.49182	5.53463	7.0282	7.22033	15.9801	16.0168	21.3959	21.9457	38.4213	38.5328	55.379	54.6152
132.048	2.42371	2.49243	7.00793	6.98135	7.68298	7.98855	17.3668	17.3017	22.9476	23.3805	41.4069	41.1286	57.329	56.2705	1.79871	1.83419	5.4906	5.53882	7.02747	7.22581	15.9921	16.0283	21.403	21.9617	38.4415	38.5583	55.4188	54.6462
132.148	2.42395	2.49437	7.00769	6.98642	7.68127	7.99459	17.3688	17.314	22.9557	23.3977	41.4283	41.1551	57.3549	56.3024	1.79846	1.83583	5.50061	5.54301	7.02722	7.2313	16.0104	16.0398	21.4144	21.9777	38.4572	38.5839	55.454	54.6772
132.248	2.43445	2.49631	7.03039	6.99149	7.69177	8.00062	17.3988	17.3264	22.976	23.4148	41.4603	41.1815	57.3927	56.3343	1.80945	1.83746	5.50745	5.54719	7.04602	7.23678	16.0105	16.0513	21.4388	21.9937	38.4857	38.6094	55.4825	54.7082
132.348	2.43457	2.49825	7.02808	6.99655	7.69189	8.00666	17.3989	17.3387	22.9937	23.4319	41.4858	41.208	57.4236	56.3662	1.80713	1.8391	5.50562	5.55138	7.0437	7.24226	16.0259	16.0628	21.4507	22.0097	38.4932	38.6349	55.5078	54.7391
132.448	2.43823	2.50019	7.03223	7.00162	7.70728	8.0127	17.4106	17.351	23.0054	23.449	41.511	41.2345	57.4744	56.3981	1.81128	1.84073	5.49951	5.55557	7.04004	7.24774	16.0387	16.0743	21.4543	22.0257	38.5188	38.6604	55.5447	54.7701
132.548	2.44543	2.50213	7.04089	7.00668	7.72009	8.01873	17.4332	17.3634	23.0162	23.4661	41.5436	41.2609	57.5148	56.4299	1.81995	1.84237	5.51233	5.55976	7.04871	7.25322	16.0488	16.0857	21.4867	22.0417	38.5428	38.6859	55.5848	54.801
132.648	2.44165	2.50407	7.05103	7.01175	7.72241	8.02476	17.4373	17.3757	23.0376	23.4832	41.5671	41.2874	57.5459	56.4618	1.81445	1.844	5.50659	5.56394	7.05103	7.25869	16.0513	16.0972	21.5007	22.0577	38.5688	38.7114	55.6047	54.8319
132.748	2.44605	2.506	7.05542	7.01681	7.73462	8.03079	17.4478	17.388	23.0461	23.5003	41.5854	41.3138	57.5762	56.4936	1.81689	1.84564	5.51514	5.56813	7.06128	7.26417	16.0671	16.1087	21.511	22.0736	38.5908	38.7369	55.6404	54.8628
132.848	2.45215	2.50794	7.06152	7.02187	7.74072	8.03682	17.4631	17.4004	23.0583	23.5174	41.605	41.3402	57.613	56.5254	1.82105	1.84727	5.51709	5.57231	7.07104	7.26964	16.0864	16.1202	21.5151	22.0896	38.6123	38.7624	55.6697	54.8936
132.948	2.45801	2.50988	7.0791	7.02694	7.74658	8.04285	17.481	17.4127	23.0833	23.5345	41.6477	41.3667	57.6563	56.5572	1.8208	1.84891	5.53272	5.5765	7.08301	7.27511	16.0956	16.1317	21.5405	22.1056	38.6438	38.7878	55.7048	54.9245
133.048	2.46472	2.51182	7.08582	7.032	7.74963	8.04888	17.4957	17.425	23.0961	23.5516	41.6801	41.3931	57.6825	56.589	1.82996	1.85054	5.54553	5.58068	7.08606	7.28058	16.1079	16.1432	21.5436	22.1216	38.672	38.8133	55.7372	54.9553
133.148	2.46582	2.51375	7.08691	7.03706	7.74658	8.05491	17.5005	17.4373	23.1187	23.5686	41.7087	41.4195	57.7109	56.6207	1.83057	1.85217	5.54858	5.58486	7.09839	7.28605	16.1315	16.1547	21.5579	22.1375	38.6904	38.8388	55.7695	54.9862
133.248	2.4679	2.51569	7.08899	7.04212	7.75232	8.06093	17.5199	17.4496	23.1381	23.5857	41.7299	41.4459	57.756	56.6525	1.83679	1.8538	5.54456	5.58905	7.10461	7.29152	16.1387	16.1661	21.5739	22.1535	38.7162	38.8642	55.7889	55.017
133.348	2.46118	2.51762	7.08789	7.04718	7.74976	8.06695	17.5271	17.462	23.1489	23.6028	41.7468	41.4723	57.7822	56.6842	1.82227	1.85544	5.54761	5.59323	7.10352	7.29699	16.1375	16.1776	21.5825	22.1694	38.7346	38.8897	55.8135	55.0477
133.448	2.46558	2.51956	7.09277	7.05224	7.76025	8.07298	17.5413	17.4743	23.1636	23.6199	41.7651	41.4987	57.8184	56.716	1.82105	1.85707	5.55615	5.59741	7.09668	7.30245	16.1587	16.1891	21.6028	22.1854	38.7627	38.9151	55.8494	55.0785
133.548	2.47754	2.52149	7.09863	7.0573	7.76611	8.079	17.5513	17.4866	23.1772	23.6369	41.8079	41.5251	57.8555	56.7477	1.8208	1.8587	5.56396	5.60159	7.10815	7.30792	16.1688	16.2005	21.6262	22.2013	38.7979	38.9405	55.8884	55.1093
133.648	2.47937	2.52343	7.10046	7.06235	7.77771	8.08502	17.569	17.4989	23.1927	23.654	41.8434	41.5515	57.8732	56.7793	1.82507	1.86033	5.56018	5.60577	7.11609	7.31338	16.1813	16.212	21.6285	22.2173	38.8217	38.966	55.9122	55.14
133.748	2.47864	2.52536	7.09973	7.06741	7.77893	8.09104	17.5641	17.5112	23.2135	23.6711	41.8617	41.5779	57.9073	56.811	1.82019	1.86196	5.56506	5.60994	7.11536	7.31884	16.191	16.2235	21.641	22.2332	38.8322	38.9914	55.9305	55.1708
133.848	2.4823	2.52729	7.10339	7.07247	7.77698	8.09705	17.5795	17.5235	23.223	23.6881	41.8834	41.6043	57.9366	56.8427	1.8219	1.86359	5.57287	5.61412	7.11902	7.3243	16.2028	16.2349	21.653	22.2492	38.8595	39.0168	55.9579	55.2015
133.948	2.48254	2.52923	7.11145	7.07752	7.77112	8.10307	17.5875	17.5358	23.2386	23.7052	41.9144	41.6306	57.9618	56.8743	1.82581	1.86522	5.57092	5.6183	7.11926	7.32976	16.2236	16.2464	21.6644	22.2651	38.8829	39.0422	55.9894	55.2321
134.048	2.48755	2.53116	7.12012	7.08258	7.77979	8.10908	17.6079	17.5481	23.2693	23.7222	41.9529	41.657	58.0078	56.9059	1.83691	1.86685	5.58569	5.62247	7.13965	7.33522	16.2136	16.2579	21.687	22.281	38.9116	39.0676	56.0254	55.2628
134.148	2.4812	2.53309	7.11426	7.08763	7.78564	8.1151	17.6155	17.5604	23.2747	23.7393	41.9624	41.6833	58.0352	56.9376	1.82471	1.86848	5.57739	5.62665	7.1394	7.34067	16.2164	16.2693	21.6985	22.2969	38.9268	39.093	56.0447	55.2935
134.248	2.48254	2.53503	7.11707	7.09268	7.78845	8.12111	17.6305	17.5727	23.2838	23.7563	41.9945	41.7097	58.0597	56.9692	1.828	1.87011	5.59045	5.63082	7.1427	7.34613	16.2321	16.2808	21.7096	22.3129	38.9496	39.1184	56.0714	55.3241
134.348	2.48059	2.53696	7.12122	7.09774	7.7926	8.12712	17.6364	17.585	23.2992	23.7734	42.0219	41.736	58.089	57.0007	1.82971	1.87174	5.59827	5.635	7.14075	7.35158	16.2449	16.2922	21.723	22.3288	38.9767	39.1438	56.1005	55.3548
134.448	2.48316	2.53889	7.11817	7.10279	7.79736	8.13313	17.6487	17.5973	23.3101	23.7904	42.0444	41.7624	58.1208	57.0323	1.83081	1.87337	5.59326	5.63917	7.14136	7.35703	16.2604	16.3037	21.7241	22.3447	39.0029	39.1691	56.1267	55.3854
134.548	2.49915	2.54082	7.12805	7.10784	7.80725	8.13913	17.6627	17.6096	23.3373	23.8074	42.0739	41.7887	58.1718	57.0639	1.82898	1.875	5.6051	5.64334	7.1554	7.36248	16.2798	16.3151	21.7592	22.3606	39.0421	39.1945	56.174	55.416
134.648	2.49707	2.54275	7.14331	7.11289	7.82056	8.14514	17.6802	17.6219	23.3645	23.8245	42.0952	41.815	58.1953	57.0954	1.84424	1.87663	5.61279	5.64752	7.15332	7.36793	16.2889	16.3266	21.7632	22.3765	39.0693	39.2198	56.197	55.4466
134.748	2.49988	2.54468	7.14661	7.11794	7.8219	8.15115	17.6947	17.6342	23.3776	23.8415	42.1234	41.8413	58.2198	57.1269	1.83582	1.87825	5.6217	5.65169	7.15613	7.37338	16.3091	16.338	21.7836	22.3924	39.0958	39.2452	56.2235	55.4771
134.848	2.51245	2.54661	7.15308	7.12299	7.83032	8.15715	17.7114	17.6465	23.3882	23.8585	42.1499	41.8676	58.2595	57.1584	1.84228	1.87988	5.62256	5.65586	7.1687	7.37883	16.3193	16.3495	21.8079	22.4083	39.1279	39.2705	56.25	55.5077
134.948	2.51294	2.54854	7.15356	7.12804	7.83276	8.16315	17.7251	17.6588	23.4019	23.8755	42.1775	41.8939	58.2815	57.1899	1.84277	1.88151	5.62085	5.66003	7.16919	7.38427	16.3182	16.3609	21.8103	22.4242	39.1536	39.2959	56.2715	55.5382
135.048	2.51184	2.55047	7.15808	7.13309	7.83948	8.16915	17.7379	17.671	23.4183	23.8926	42.2015	41.9202	58.3116	57.2214	1.84729	1.88313	5.62952	5.6642	7.17371	7.38972	16.3269	16.3723	21.8344	22.4401	39.1703	39.3212	56.3114	55.5687
135.148	2.50879	2.5524	7.17285	7.13814	7.84815	8.17515	17.7466	17.6833	23.4312	23.9096	42.2241	41.9465	58.3318	57.2528	1.85034	1.88476	5.63623	5.66836	7.17676	7.39516	16.3405	16.3838	21.8489	22.456	39.1904	39.3465	56.332	55.5992
135.248	2.51086	2.55433	7.17859	7.14319	7.85388	8.18115	17.7601	17.6956	23.4528	23.9266	42.2513	41.9728	58.3771	57.2843	1.85242	1.88639	5.64807	5.67253	7.18445	7.4006	16.3525	16.3952	21.8668	22.4719	39.2162	39.3718	56.3593	55.6297
135.348	2.5127	2.55626	7.17896	7.14823	7.87158	8.18715	17.7778	17.7079	23.4663	23.9436	42.2732	41.9991	58.3984	57.3157	1.84058	1.88801	5.64233	5.6767	7.19043	7.40604	16.3571	16.4067	21.8804	22.4877	39.2375	39.3971	56.3887	55.6602
135.448	2.50989	2.55819	7.17786	7.15328	7.86877	8.19315	17.7867	17.7202	23.4713	23.9606	42.2914	42.0254	58.4269	57.3471	1.84753	1.88964	5.64319	5.68086	7.18567	7.41148	16.3759	16.4181	21.8854	22.5036	39.2599	39.4224	56.4091	55.6906
135.548	2.51453	2.56011	7.18445	7.15832	7.86975	8.19914	17.7992	17.7324	23.4955	23.9776	42.3239	42.0516	58.4628	57.3785	1.84241	1.89126	5.65393	5.68503	7.19226	7.41692	16.3738	16.4295	21.8981	22.5195	39.2865	39.4477	56.4357	55.7211
135.648	2.5166	2.56204	7.18848	7.16337	7.86768	8.20513	17.813	17.7447	23.5149	23.9946	42.3335	42.0779	58.4922	57.4099	1.84644	1.89289	5.66357	5.68919	7.19629	7.42235	16.4028	16.4409	21.9075	22.5354	39.3115	39.473	56.4624	55.7515
135.748	2.52051	2.56397	7.19604	7.16841	7.87939	8.21113	17.8303	17.757	23.5327	24.0116	42.3743	42.1041	58.5273	57.4413	1.85596	1.89451	5.66943	5.69336	7.20386	7.42778	16.4156	16.4524	21.9329	22.5512	39.3447	39.4983	56.5078	55.7819
135.848	2.52917	2.56589	7.20325	7.17346	7.88245	8.21712	17.8395	17.7693	23.5475	24.0286	42.4108	42.1304	58.5673	57.4726	1.86511	1.89613	5.67053	5.69752	7.21667	7.43322	16.4248	16.4638	21.9498	22.5671	39.3734	39.5236	56.5438	55.8123
135.948	2.52856	2.56782	7.19653	7.1785	7.88135	8.22311	17.8445	17.7815	23.564	24.0455	42.4158	42.1566	58.594	57.5039	1.86206	1.89776	5.66992	5.70168	7.21606	7.43865	16.4399	16.4752	21.9585	22.5829	39.3899	39.5488	56.5745	55.8426
136.048	2.53027	2.56975	7.20386	7.18354	7.88916	8.22909	17.854	17.7938	23.5698	24.0625	42.437	42.1829	58.6387	57.5353	1.86011	1.89938	5.68091	5.70585	7.21777	7.44408	16.4404	16.4866	21.9817	22.5988	39.4209	39.5741	56.5994	55.873
136.148	2.52832	2.57167	7.20435	7.18858	7.89526	8.23508	17.8638	17.806	23.5894	24.0795	42.4626	42.2091	58.6641	57.5666	1.85449	1.901	5.67774	5.71001	7.21582	7.44951	16.446	16.498	21.99	22.6146	39.4409	39.5993	56.6292	55.9033
136.248	2.51465	2.5736	7.19824	7.19362	7.90064	8.24107	17.8735	17.8183	23.6089	24.0965	42.4875	42.2353	58.699	57.5978	1.854	1.90263	5.68091	5.71417	7.21948	7.45494	16.4518	16.5094	21.9956	22.6305	39.458	39.6246	56.6482	55.9336
136.348	2.51672	2.57552	7.21204	7.19866	7.90686	8.24705	17.8834	17.8306	23.6227	24.1135	42.5055	42.2615	58.7267	57.6291	1.86218	1.90425	5.69885	5.71833	7.23547	7.46036	16.4617	16.5209	22.0092	22.6463	39.4894	39.6498	56.6796	55.964
136.448	2.52026	2.57745	7.19824	7.2037	7.90479	8.25303	17.8987	17.8428	23.6458	24.1304	42.5229	42.2877	58.7559	57.6604	1.84839	1.90587	5.70654	5.72248	7.2334	7.46579	16.4673	16.5323	22.0168	22.6621	39.5129	39.6751	56.7129	55.9942
136.548	2.51856	2.57937	7.21362	7.20874	7.90479	8.25902	17.9126	17.8551	23.6636	24.1474	42.5481	42.3139	58.7986	57.6916	1.84839	1.90749	5.71631	5.72664	7.23901	7.47121	16.4921	16.5437	22.0347	22.678	39.5498	39.7003	56.738	56.0245
136.648	2.52551	2.58129	7.23035	7.21378	7.92908	8.26499	17.9406	17.8673	23.6937	24.1643	42.5844	42.3401	58.8466	57.7228	1.8512	1.90911	5.72131	5.7308	7.25574	7.47663	16.4899	16.5551	22.0668	22.6938	39.5746	39.7255	56.7821	56.0548
136.748	2.52527	2.58322	7.23059	7.21882	7.93298	8.27097	17.9528	17.8796	23.6998	24.1813	42.6078	42.3663	58.8741	57.754	1.84949	1.91074	5.72522	5.73496	7.25403	7.48205	16.5083	16.5665	22.0707	22.7096	39.5997	39.7507	56.8094	56.085
136.848	2.52832	2.58514	7.23315	7.22385	7.9419	8.27695	17.9614	17.8918	23.7085	24.1983	42.6304	42.3925	58.908	57.7852	1.84644	1.91236	5.72022	5.73911	7.25659	7.48747	16.5233	16.5779	22.0913	22.7254	39.6299	39.7759	56.8398	56.1152
136.948	2.53308	2.58706	7.25183	7.22889	7.95471	8.28293	17.976	17.9041	23.7174	24.2152	42.6627	42.4187	58.9542	57.8164	1.85315	1.91398	5.73108	5.74327	7.26746	7.49289	16.5184	16.5893	22.098	22.7413	39.6603	39.8011	56.8661	56.1454
137.048	2.53235	2.58899	7.2511	7.23393	7.94983	8.2889	17.9926	17.9163	23.7299	24.2322	42.683	42.4448	58.9843	57.8476	1.84265	1.9156	5.72815	5.74742	7.26672	7.49831	16.5319	16.6007	22.1224	22.7571	39.6674	39.8263	56.9022	56.1756
137.148	2.52844	2.59091	7.24719	7.23896	7.94592	8.29488	17.9928	17.9286	23.7516	24.2491	42.7047	42.471	59.0157	57.8787	1.83875	1.91722	5.73401	5.75157	7.26843	7.50372	16.5532	16.6121	22.1227	22.7729	39.6886	39.8515	56.9276	56.2058
137.248	2.53784	2.59283	7.25659	7.24399	7.95532	8.30085	18.0161	17.9408	23.7671	24.266	42.7317	42.4971	59.0642	57.9098	1.84619	1.91884	5.74951	5.75573	7.27832	7.50914	16.5574	16.6234	22.1516	22.7887	39.7297	39.8767	56.9607	56.236
137.348	2.53589	2.59475	7.26636	7.24903	7.96143	8.30682	18.0161	17.9531	23.7786	24.283	42.7593	42.5233	59.1016	57.941	1.84668	1.92045	5.74756	5.75988	7.2876	7.51455	16.5663	16.6348	22.1731	22.8045	39.7451	39.9018	56.9961	56.2661
137.448	2.53723	2.59667	7.2677	7.25406	7.97034	8.31279	18.0306	17.9653	23.7994	24.2999	42.7838	42.5494	59.1261	57.9721	1.83557	1.92207	5.75818	5.76403	7.29504	7.51996	16.5769	16.6462	22.1744	22.8203	39.7716	39.927	57.0302	56.2962
137.548	2.54004	2.59859	7.28784	7.25909	7.97681	8.31876	18.0474	17.9775	23.8196	24.3168	42.804	42.5756	59.1602	58.0031	1.84253	1.92369	5.76904	5.76818	7.31323	7.52537	16.5868	16.6576	22.1907	22.8361	39.8	39.9521	57.0586	56.3263
137.648	2.54382	2.60051	7.29211	7.26412	7.98694	8.32472	18.0609	17.9898	23.8434	24.3338	42.8356	42.6017	59.201	58.0342	1.83459	1.92531	5.77332	5.77233	7.32117	7.53078	16.5886	16.669	22.2103	22.8519	39.8153	39.9773	57.0878	56.3564
137.748	2.54395	2.60243	7.29761	7.26915	7.98877	8.33069	18.0669	18.002	23.8684	24.3507	42.8645	42.6278	59.2517	58.0653	1.84619	1.92693	5.77881	5.77648	7.3291	7.53619	16.6021	16.6804	22.2297	22.8676	39.8469	40.0024	57.125	56.3865
137.848	2.54761	2.60435	7.30737	7.27418	8.0061	8.33666	18.0803	18.0142	23.8899	24.3676	42.9016	42.6539	59.2813	58.0963	1.85596	1.92854	5.78857	5.78063	7.33472	7.54159	16.6201	16.6917	22.2532	22.8834	39.876	40.0276	57.1423	56.4166
137.948	2.552	2.60627	7.32153	7.27921	8.01245	8.34262	18.1021	18.0265	23.9158	24.3845	42.9275	42.6801	59.3088	58.1273	1.8623	1.93016	5.7832	5.78478	7.34106	7.547	16.614	16.7031	22.2827	22.8992	39.9055	40.0527	57.1719	56.4466
138.048	2.55151	2.60819	7.31543	7.28424	8.01416	8.34858	18.1079	18.0387	23.9292	24.4014	42.9563	42.7062	59.3572	58.1583	1.84839	1.93178	5.78076	5.78893	7.33862	7.5524	16.6334	16.7145	22.2925	22.915	39.917	40.0778	57.1973	56.4766
138.148	2.56165	2.61011	7.33118	7.28927	8.01819	8.35454	18.1293	18.0509	23.9447	24.4183	42.9896	42.7323	59.3849	58.1893	1.85803	1.93339	5.79456	5.79307	7.3468	7.5578	16.6405	16.7259	22.3099	22.9307	39.9467	40.1029	57.2186	56.5066
138.248	2.56043	2.61203	7.32996	7.2943	8.02503	8.3605	18.1422	18.0631	23.9557	24.4352	43.0104	42.7583	59.4169	58.2203	1.86292	1.93501	5.79724	5.79722	7.35364	7.5632	16.6356	16.7372	22.3148	22.9465	39.9572	40.128	57.2567	56.5366
138.348	2.56531	2.61395	7.32922	7.29933	8.0238	8.36646	18.1451	18.0753	23.9703	24.4521	43.0367	42.7844	59.4376	58.2512	1.86218	1.93663	5.80823	5.80136	7.35437	7.5686	16.6375	16.7486	22.3258	22.9623	39.9816	40.1531	57.2889	56.5666
138.448	2.57324	2.61586	7.33667	7.30435	8.0354	8.37241	18.1643	18.0876	23.9973	24.469	43.0618	42.8105	59.4707	58.2822	1.86963	1.93824	5.81982	5.80551	7.35425	7.574	16.6559	16.76	22.3333	22.978	40.0049	40.1782	57.3262	56.5966
138.548	2.57434	2.61778	7.34387	7.30938	8.05041	8.37837	18.1752	18.0998	24.0162	24.4859	43.0922	42.8366	59.4991	58.3131	1.87683	1.93986	5.81897	5.80965	7.36511	7.5794	16.6649	16.7713	22.3483	22.9938	40.0297	40.2033	57.3524	56.6265
138.648	2.56946	2.6197	7.33899	7.3144	8.04553	8.38432	18.1823	18.112	24.0309	24.5028	43.1129	42.8626	59.5428	58.344	1.87561	1.94147	5.81238	5.81379	7.37805	7.58479	16.6669	16.7827	22.3644	23.0095	40.0499	40.2284	57.3849	56.6564
138.748	2.56531	2.62161	7.35803	7.31943	8.0531	8.39028	18.2015	18.1242	24.0524	24.5197	43.14	42.8887	59.5819	58.3749	1.87561	1.94309	5.82361	5.81793	7.36829	7.59018	16.6774	16.7941	22.3961	23.0253	40.0775	40.2534	57.41	56.6864
138.848	2.57019	2.62353	7.3634	7.32445	8.06604	8.39623	18.2106	18.1364	24.0726	24.5366	43.1647	42.9148	59.6124	58.4058	1.87683	1.9447	5.82898	5.82208	7.3844	7.59558	16.6813	16.8054	22.3969	23.041	40.088	40.2785	57.4462	56.7162
138.948	2.56848	2.62545	7.35754	7.32947	8.06018	8.40218	18.2201	18.1486	24.0846	24.5535	43.182	42.9408	59.6378	58.4366	1.87463	1.94631	5.81702	5.82622	7.38879	7.60097	16.696	16.8168	22.4203	23.0567	40.1136	40.3035	57.4659	56.7461
139.048	2.57495	2.62736	7.37573	7.3345	8.0647	8.40813	18.2251	18.1608	24.105	24.5704	43.22	42.9668	59.6716	58.4675	1.87964	1.94793	5.82764	5.83036	7.38965	7.60636	16.705	16.8281	22.4253	23.0725	40.1318	40.3286	57.5095	56.776
139.148	2.58191	2.62928	7.37903	7.33952	8.06604	8.41407	18.2474	18.173	24.1217	24.5872	43.235	42.9929	59.6981	58.4983	1.88245	1.94954	5.81726	5.83449	7.3905	7.61175	16.7001	16.8395	22.4398	23.0882	40.1603	40.3536	57.536	56.8058
139.248	2.57336	2.63119	7.37781	7.34454	8.07459	8.42002	18.2487	18.1853	24.1246	24.6041	43.2533	43.0189	59.7286	58.5291	1.87195	1.95115	5.81799	5.83863	7.39539	7.61713	16.7095	16.8508	22.4525	23.1039	40.181	40.3787	57.5685	56.8357
139.348	2.5769	2.63311	7.3916	7.34956	8.07861	8.42596	18.2583	18.1975	24.1497	24.621	43.2671	43.0449	59.7461	58.5599	1.86987	1.95277	5.8313	5.84277	7.39941	7.62252	16.7256	16.8622	22.4719	23.1196	40.2021	40.4037	57.5952	56.8655
139.448	2.58325	2.63502	7.39746	7.35458	8.08252	8.43191	18.27	18.2097	24.1619	24.6378	43.2869	43.0709	59.7776	58.5907	1.87378	1.95438	5.83398	5.84691	7.40527	7.6279	16.7195	16.8735	22.4861	23.1354	40.2261	40.4287	57.6426	56.8953
139.548	2.57715	2.63693	7.40527	7.3596	8.08057	8.43785	18.2798	18.2219	24.1753	24.6547	43.3137	43.0969	59.8083	58.6215	1.86963	1.95599	5.83154	5.85105	7.40527	7.63329	16.735	16.8848	22.4954	23.1511	40.2512	40.4537	57.6658	56.925
139.648	2.57898	2.63885	7.40344	7.36462	8.09045	8.44379	18.2858	18.234	24.1852	24.6715	43.3492	43.1229	59.8517	58.6522	1.8739	1.9576	5.83948	5.85518	7.40344	7.63867	16.745	16.8962	22.515	23.1668	40.2611	40.4787	57.701	56.9548
139.748	2.56751	2.64076	7.4032	7.36963	8.09216	8.44973	18.2992	18.2462	24.1891	24.6884	43.3685	43.1489	59.8673	58.6829	1.87561	1.95921	5.82996	5.85931	7.4032	7.64405	16.7429	16.9075	22.525	23.1825	40.2823	40.5037	57.7267	56.9845
139.848	2.57105	2.64267	7.41089	7.37465	8.10791	8.45567	18.311	18.2584	24.2104	24.7052	43.3901	43.1749	59.9001	58.7137	1.8833	1.96082	5.83716	5.86345	7.41309	7.64943	16.7605	16.9189	22.5266	23.1982	40.2942	40.5287	57.7556	57.0143
139.948	2.58301	2.64459	7.43457	7.37967	8.11377	8.46161	18.3286	18.2706	24.2241	24.7221	43.4211	43.2009	59.9375	58.7444	1.89331	1.96243	5.85327	5.86758	7.42456	7.6548	16.7714	16.9302	22.554	23.2139	40.3232	40.5537	57.8025	57.044
140.048	2.58606	2.6465	7.44543	7.38468	8.1283	8.46754	18.3317	18.2828	24.2467	24.7389	43.4537	43.2269	59.9774	58.775	1.90198	1.96404	5.85779	5.87172	7.43372	7.66018	16.7867	16.9415	22.5709	23.2296	40.3556	40.5787	57.8348	57.0737
140.148	2.58777	2.64841	7.4491	7.3897	8.13049	8.47347	18.3529	18.295	24.2565	24.7557	43.4791	43.2528	60.0011	58.8057	1.89807	1.96565	5.86609	5.87585	7.43176	7.66556	16.7898	16.9528	22.5746	23.2453	40.3868	40.6037	57.8622	57.1034
140.248	2.58887	2.65032	7.45215	7.39471	8.13306	8.47941	18.3657	18.3072	24.2612	24.7726	43.4993	43.2788	60.033	58.8364	1.89917	1.96726	5.85693	5.87998	7.42456	7.67093	16.7974	16.9642	22.593	23.2609	40.3958	40.6286	57.8848	57.133
140.348	2.59058	2.65223	7.4519	7.39973	8.14697	8.48534	18.3752	18.3194	24.269	24.7894	43.5168	43.3048	60.0527	58.867	1.90088	1.96887	5.86279	5.88411	7.43042	7.6763	16.8192	16.9755	22.6067	23.2766	40.417	40.6536	57.9177	57.1626
140.448	2.60266	2.65414	7.46765	7.40474	8.15295	8.49127	18.399	18.3315	24.3002	24.8062	43.5658	43.3307	60.0956	58.8976	1.90515	1.97048	5.87292	5.88824	7.4425	7.68167	16.8125	16.9868	22.6305	23.2923	40.4542	40.6785	57.953	57.1923
140.548	2.59595	2.65605	7.47876	7.40975	8.14624	8.4972	18.3979	18.3437	24.3113	24.8231	43.5847	43.3566	60.1223	58.9282	1.89844	1.97209	5.86401	5.89237	7.43945	7.68704	16.8247	16.9981	22.6316	23.308	40.4768	40.7035	57.9817	57.2219
140.648	2.59644	2.65796	7.4773	7.41476	8.15454	8.50313	18.4185	18.3559	24.3257	24.8399	43.6028	43.3826	60.1367	58.9588	1.89697	1.9737	5.86865	5.89649	7.42676	7.69241	16.8386	17.0095	22.6418	23.3236	40.5049	40.7284	58.0095	57.2515
140.748	2.59839	2.65987	7.48145	7.41978	8.16064	8.50905	18.4221	18.3681	24.3335	24.8567	43.6265	43.4085	60.168	58.9894	1.89502	1.9753	5.8667	5.90062	7.44409	7.69777	16.8512	17.0208	22.6655	23.3393	40.5225	40.7533	58.0469	57.2811
140.848	2.61145	2.66178	7.49036	7.42479	8.17322	8.51498	18.4547	18.3802	24.3578	24.8735	43.6549	43.4344	60.2081	59.0199	1.91003	1.97691	5.87366	5.90475	7.44738	7.70314	16.8622	17.0321	22.6918	23.355	40.5607	40.7782	58.0907	57.3106
140.948	2.60657	2.66369	7.48547	7.4298	8.17249	8.5209	18.4498	18.3924	24.3766	24.8903	43.6752	43.4603	60.2362	59.0505	1.90515	1.97852	5.87854	5.90888	7.45984	7.7085	16.8746	17.0434	22.7045	23.3706	40.5814	40.8031	58.1095	57.3402
141.048	2.61121	2.6656	7.49792	7.43481	8.17151	8.52682	18.4606	18.4046	24.3756	24.9071	43.692	43.4862	60.2726	59.081	1.90198	1.98013	5.87585	5.913	7.46863	7.71387	16.8759	17.0547	22.7076	23.3863	40.5958	40.8281	58.1337	57.3697
141.148	2.61243	2.6675	7.49915	7.43981	8.18396	8.53274	18.4691	18.4168	24.3959	24.9239	43.7103	43.5121	60.2909	59.1115	1.9032	1.98173	5.87659	5.91713	7.4679	7.71923	16.8864	17.066	22.7201	23.4019	40.6202	40.853	58.1698	57.3992
141.248	2.60754	2.66941	7.49426	7.44482	8.18884	8.53866	18.4821	18.4289	24.4088	24.9407	43.7347	43.538	60.3097	59.142	1.90198	1.98334	5.88147	5.92125	7.46301	7.72459	16.8875	17.0773	22.7445	23.4176	40.6527	40.8778	58.1886	57.4287
141.348	2.59644	2.67132	7.50293	7.44983	8.19775	8.54458	18.4905	18.4411	24.4136	24.9575	43.7573	43.5639	60.3379	59.1725	1.89136	1.98494	5.87085	5.92537	7.46558	7.72995	16.8906	17.0886	22.7629	23.4332	40.6611	40.9027	58.2224	57.4582
141.448	2.60156	2.67323	7.49829	7.45484	8.19312	8.5505	18.49	18.4532	24.4321	24.9743	43.7759	43.5898	60.3645	59.2029	1.88672	1.98655	5.87549	5.9295	7.4707	7.7353	16.9056	17.0999	22.7722	23.4488	40.6858	40.9276	58.2512	57.4876
141.548	2.60901	2.67513	7.49963	7.45984	8.19641	8.55642	18.4994	18.4654	24.4457	24.9911	43.8029	43.6157	60.3873	59.2334	1.8783	1.98816	5.88123	5.93362	7.47253	7.74066	16.9178	17.1112	22.7872	23.4645	40.7208	40.9525	58.2643	57.5171
141.648	2.61926	2.67704	7.5155	7.46485	8.22034	8.56233	18.525	18.4776	24.4652	25.0079	43.8463	43.6416	60.4269	59.2638	1.88635	1.98976	5.89709	5.93774	7.48425	7.74601	16.9321	17.1225	22.8073	23.4801	40.7443	40.9773	58.3075	57.5465
141.748	2.62207	2.67895	7.53223	7.46985	8.22681	8.56824	18.5334	18.4897	24.4976	25.0247	43.8743	43.6674	60.4646	59.2942	1.89893	1.99136	5.89795	5.94186	7.49316	7.75137	16.9452	17.1338	22.8254	23.4957	40.7764	41.0022	58.3455	57.5759
141.848	2.61316	2.68085	7.53308	7.47486	8.22815	8.57415	18.5563	18.5019	24.5026	25.0414	43.9008	43.6933	60.4972	59.3246	1.90222	1.99297	5.90686	5.94598	7.49036	7.75672	16.9517	17.1451	22.8346	23.5113	40.7972	41.027	58.3761	57.6053
141.948	2.62012	2.68276	7.5498	7.47986	8.23462	8.58007	18.5571	18.514	24.5151	25.0582	43.9253	43.7191	60.5176	59.355	1.90308	1.99457	5.90967	5.9501	7.49487	7.76207	16.9697	17.1564	22.8528	23.527	40.8232	41.0519	58.4001	57.6347
142.048	2.62036	2.68466	7.54395	7.48486	8.24878	8.58598	18.5769	18.5262	24.5405	25.075	43.9568	43.745	60.5625	59.3853	1.89526	1.99618	5.91406	5.95422	7.50488	7.76742	16.9792	17.1677	22.8669	23.5426	40.8528	41.0767	58.4241	57.664
142.148	2.62769	2.68657	7.55176	7.48986	8.25049	8.59188	18.5823	18.5383	24.5562	25.0917	43.9836	43.7708	60.5898	59.4157	1.90674	1.99778	5.90967	5.95833	7.5127	7.77277	16.9932	17.1789	22.8804	23.5582	40.8782	41.1015	58.4626	57.6934
142.248	2.63184	2.68847	7.55176	7.49487	8.24487	8.59779	18.5925	18.5505	24.5659	25.1085	44.0037	43.7966	60.6191	59.446	1.90308	1.99938	5.91382	5.96245	7.50708	7.77811	16.9871	17.1902	22.8901	23.5738	40.8977	41.1264	58.4827	57.7227
142.348	2.62988	2.69037	7.56348	7.49987	8.23877	8.60369	18.5999	18.5626	24.5718	25.1253	44.0325	43.8225	60.6367	59.4763	1.90674	2.00098	5.91748	5.96656	7.50464	7.78346	17.0103	17.2015	22.9016	23.5894	40.9248	41.1512	58.4998	57.752
142.448	2.63574	2.69228	7.56934	7.50487	8.26001	8.6096	18.6235	18.5747	24.5894	25.142	44.0737	43.8483	60.6738	59.5066	1.9187	2.00259	5.92944	5.97068	7.51465	7.7888	17.0182	17.2128	22.9136	23.605	40.9482	41.176	58.5466	57.7813
142.548	2.63953	2.69418	7.57117	7.50987	8.26233	8.6155	18.6295	18.5869	24.6071	25.1588	44.097	43.8741	60.705	59.5369	1.91687	2.00419	5.92908	5.97479	7.51843	7.79414	17.0292	17.2241	22.9349	23.6206	40.9757	41.2008	58.5741	57.8105
142.648	2.66003	2.69608	7.57434	7.51486	8.26697	8.6214	18.6439	18.599	24.6234	25.1755	44.1217	43.8999	60.7413	59.5672	1.92151	2.00579	5.94202	5.97891	7.53699	7.79948	17.0416	17.2353	22.9437	23.6362	40.9984	41.2256	58.6024	57.8398
142.748	2.64758	2.69799	7.58118	7.51986	8.26819	8.6273	18.6549	18.6112	24.6268	25.1923	44.14	43.9257	60.7677	59.5974	1.91467	2.00739	5.9469	5.98302	7.53259	7.80482	17.0468	17.2466	22.9567	23.6517	41.0109	41.2503	58.6288	57.869
142.848	2.64661	2.69989	7.58582	7.52486	8.28455	8.6332	18.6674	18.6233	24.6371	25.209	44.1627	43.9515	60.7899	59.6276	1.91785	2.00899	5.94592	5.98713	7.53113	7.81016	17.0588	17.2579	22.9613	23.6673	41.0355	41.2751	58.661	57.8983
142.948	2.65503	2.70179	7.59473	7.52986	8.29712	8.6391	18.6763	18.6354	24.6538	25.2257	44.2024	43.9772	60.8416	59.6579	1.91846	2.01059	5.95483	5.99124	7.54004	7.8155	17.0769	17.2691	22.9934	23.6829	41.0579	41.2999	58.6953	57.9275
143.048	2.66113	2.70369	7.6062	7.53485	8.30127	8.64499	18.688	18.6475	24.6692	25.2425	44.228	44.003	60.8789	59.688	1.92456	2.01219	5.9585	5.99536	7.5437	7.82083	17.0981	17.2804	23.0054	23.6985	41.083	41.3246	58.7126	57.9566
143.148	2.66138	2.70559	7.6106	7.53985	8.30151	8.65089	18.7017	18.6597	24.6931	25.2592	44.2632	44.0288	60.9043	59.7182	1.92847	2.01379	5.95679	5.99947	7.5481	7.82617	17.1005	17.2917	23.0173	23.714	41.1011	41.3494	58.75	57.9858
143.248	2.65344	2.70749	7.60266	7.54484	8.30701	8.65678	18.7115	18.6718	24.7047	25.2759	44.2789	44.0545	60.9415	59.7484	1.92468	2.01539	5.95081	6.00357	7.54578	7.8315	17.1237	17.3029	23.0267	23.7296	41.1127	41.3742	58.7775	58.015
143.348	2.65515	2.70939	7.60852	7.54984	8.31897	8.66267	18.7289	18.6839	24.7106	25.2926	44.3177	44.0803	60.9706	59.7785	1.93616	2.01699	5.96643	6.00768	7.5614	7.83683	17.1392	17.3142	23.0502	23.7452	41.1417	41.3989	58.8085	58.0441
143.448	2.66284	2.71129	7.61206	7.55483	8.32056	8.66856	18.7427	18.696	24.7336	25.3094	44.3452	44.1061	60.9922	59.8087	1.92847	2.01859	5.9624	6.01179	7.56348	7.84216	17.152	17.3254	23.0522	23.7607	41.1633	41.4236	58.8357	58.0732
143.548	2.67981	2.71319	7.63293	7.55982	8.32776	8.67445	18.7592	18.7082	24.7545	25.3261	44.3756	44.1318	61.0265	59.8388	1.93518	2.02019	5.97522	6.0159	7.57214	7.84749	17.1715	17.3367	23.0726	23.7763	41.1915	41.4483	58.8663	58.1023
143.648	2.67786	2.71509	7.63464	7.56481	8.32581	8.68034	18.775	18.7203	24.764	25.3428	44.391	44.1575	61.0497	59.8689	1.93738	2.02179	5.97156	6.02	7.57996	7.85282	17.1824	17.348	23.0846	23.7918	41.2074	41.4731	58.8895	58.1314
143.748	2.68286	2.71699	7.63208	7.56981	8.32471	8.68623	18.7683	18.7324	24.7849	25.3595	44.4253	44.1833	61.0803	59.899	1.93628	2.02339	5.97412	6.02411	7.57739	7.85814	17.1997	17.3592	23.0896	23.8074	41.2239	41.4978	58.9121	58.1605
143.848	2.67871	2.71889	7.63355	7.5748	8.33838	8.69211	18.7837	18.7445	24.7942	25.3762	44.4448	44.209	61.0957	59.929	1.93823	2.02498	5.97412	6.02822	7.56543	7.86347	17.2153	17.3705	23.0969	23.8229	41.2434	41.5225	58.9255	58.1895
143.948	2.68823	2.72079	7.64551	7.57979	8.3479	8.698	18.8049	18.7566	24.8257	25.3929	44.478	44.2347	61.1443	59.9591	1.93994	2.02658	5.98975	6.03232	7.5769	7.86879	17.2303	17.3817	23.1243	23.8384	41.2744	41.5472	58.9626	58.2186
144.048	2.69348	2.72269	7.65442	7.58478	8.35315	8.70388	18.818	18.7687	24.8385	25.4096	44.516	44.2604	61.1747	59.9891	1.93347	2.02818	6.00061	6.03642	7.58777	7.87411	17.2284	17.3929	23.1432	23.854	41.2933	41.5719	59.0048	58.2476
144.148	2.69714	2.72458	7.65247	7.58977	8.36462	8.70976	18.8278	18.7808	24.848	25.4263	44.5397	44.2861	61.2101	60.0191	1.93713	2.02977	6.00061	6.04053	7.58997	7.87943	17.2407	17.4042	23.1583	23.8695	41.3146	41.5965	59.0321	58.2766
144.248	2.7002	2.72648	7.65308	7.59475	8.36768	8.71564	18.8381	18.7929	24.8608	25.443	44.5598	44.3118	61.2383	60.0491	1.94019	2.03137	6.00732	6.04463	7.59253	7.88475	17.2644	17.4154	23.1655	23.885	41.3352	41.6212	59.0583	58.3055
144.348	2.70239	2.72838	7.65942	7.59974	8.36987	8.72152	18.8582	18.8051	24.8765	25.4597	44.5974	44.3375	61.2637	60.0791	1.948	2.03297	6.00391	6.04873	7.60083	7.89007	17.2683	17.4267	23.1851	23.9005	41.3625	41.6459	59.0842	58.3345
144.448	2.69238	2.73027	7.65503	7.60473	8.37158	8.7274	18.8599	18.8172	24.8843	25.4764	44.6069	44.3632	61.2947	60.1091	1.93604	2.03456	6.00318	6.05283	7.59082	7.89539	17.2828	17.4379	23.1926	23.9161	41.3838	41.6705	59.0977	58.3635
144.548	2.70691	2.73217	7.67004	7.60972	8.38415	8.73328	18.8802	18.8293	24.9127	25.493	44.6527	44.3889	61.3292	60.139	1.9491	2.03616	6.02014	6.05693	7.60535	7.9007	17.2867	17.4491	23.2174	23.9316	41.422	41.6952	59.1317	58.3924
144.648	2.70715	2.73407	7.66419	7.6147	8.38245	8.73915	18.8903	18.8414	24.9242	25.5097	44.6725	44.4145	61.3507	60.169	1.94324	2.03775	6.02405	6.06103	7.60925	7.90602	17.3132	17.4604	23.225	23.9471	41.4398	41.7198	59.1515	58.4213
144.748	2.70996	2.73596	7.68433	7.61969	8.39087	8.74502	18.9065	18.8535	24.9446	25.5264	44.7065	44.4402	61.3904	60.1989	1.94385	2.03935	6.03101	6.06513	7.61621	7.91133	17.3142	17.4716	23.2493	23.9626	41.4717	41.7445	59.1775	58.4502
144.848	2.70532	2.73786	7.68579	7.62467	8.39233	8.7509	18.9197	18.8655	24.9558	25.5431	44.7329	44.4658	61.4231	60.2288	1.94531	2.04094	6.02393	6.06923	7.61719	7.91664	17.3384	17.4828	23.2622	23.9781	41.4963	41.7691	59.2021	58.4791
144.948	2.71167	2.73975	7.69214	7.62965	8.40283	8.75677	18.9224	18.8776	24.9836	25.5597	44.7593	44.4915	61.449	60.2587	1.948	2.04254	6.04248	6.07332	7.62964	7.92195	17.3453	17.494	23.2827	23.9936	41.5227	41.7937	59.2422	58.5079
145.048	2.71301	2.74165	7.70129	7.63464	8.40002	8.76264	18.9391	18.8897	24.9984	25.5764	44.776	44.5171	61.4816	60.2885	1.94885	2.04413	6.03772	6.07742	7.6366	7.92726	17.3602	17.5052	23.2836	24.0091	41.545	41.8183	59.2509	58.5368
145.148	2.71399	2.74354	7.70789	7.63962	8.41272	8.7685	18.9457	18.9018	25.027	25.593	44.8138	44.5428	61.5021	60.3184	1.94788	2.04572	6.04431	6.08151	7.64368	7.93257	17.3553	17.5165	23.306	24.0246	41.5717	41.843	59.2811	58.5656
145.248	2.70911	2.74543	7.70911	7.6446	8.41345	8.77437	18.9547	18.9139	25.0416	25.6097	44.8383	44.5684	61.5302	60.3482	1.9491	2.04732	6.0553	6.08561	7.64246	7.93787	17.3763	17.5277	23.3151	24.04	41.5863	41.8676	59.3192	58.5944
145.348	2.71472	2.74733	7.70911	7.64958	8.42322	8.78024	18.9664	18.926	25.0612	25.6263	44.8619	44.594	61.5675	60.378	1.9491	2.04891	6.0553	6.0897	7.64661	7.94317	17.3895	17.5389	23.3187	24.0555	41.6095	41.8921	59.3448	58.6232
145.448	2.71594	2.74922	7.70422	7.65456	8.4342	8.7861	18.9769	18.9381	25.0697	25.643	44.8883	44.6196	61.5822	60.4078	1.9364	2.0505	6.06018	6.0938	7.64734	7.94848	17.4067	17.5501	23.3353	24.071	41.6339	41.9167	59.3553	58.652
145.548	2.72144	2.75111	7.72144	7.65954	8.44385	8.79196	18.9907	18.9502	25.0894	25.6596	44.9153	44.6452	61.6189	60.4376	1.94189	2.05209	6.07178	6.09789	7.65527	7.95378	17.4137	17.5613	23.3511	24.0865	41.6653	41.9413	59.3865	58.6807
145.648	2.72278	2.75301	7.72278	7.66452	8.44666	8.79782	18.9996	18.9622	25.1019	25.6763	44.9381	44.6708	61.6398	60.4674	1.94324	2.05368	6.07874	6.10198	7.65808	7.95908	17.4346	17.5725	23.3656	24.1019	41.682	41.9659	59.4093	58.7095
145.748	2.73144	2.7549	7.72583	7.6695	8.45581	8.80369	19.0161	18.9743	25.1226	25.6929	44.9607	44.6964	61.6741	60.4971	1.94019	2.05528	6.08374	6.10607	7.6709	7.96438	17.4438	17.5837	23.3784	24.1174	41.7083	41.9904	59.4355	58.7382
145.848	2.7334	2.75679	7.72168	7.67448	8.45532	8.80954	19.0298	18.9864	25.144	25.7095	44.9934	44.722	61.7146	60.5269	1.94775	2.05687	6.08936	6.11016	7.6709	7.96967	17.4471	17.5949	23.3918	24.1328	41.7278	42.015	59.4551	58.7669
145.948	2.73059	2.75868	7.71887	7.67945	8.46228	8.8154	19.0502	18.9985	25.1566	25.7262	45.0199	44.7476	61.7491	60.5566	1.95105	2.05846	6.08459	6.11425	7.66809	7.97497	17.4625	17.6061	23.4105	24.1483	41.7501	42.0395	59.4891	58.7956
146.048	2.73059	2.76057	7.73059	7.68443	8.46838	8.82126	19.0543	19.0105	25.1686	25.7428	45.0516	44.7732	61.7765	60.5863	1.95471	2.06005	6.09998	6.11834	7.68152	7.98027	17.4811	17.6173	23.4342	24.1637	41.7875	42.0641	59.5302	58.8243
146.148	2.73523	2.76246	7.73157	7.6894	8.46936	8.82711	19.0748	19.0226	25.1869	25.7594	45.0717	44.7987	61.8124	60.616	1.95984	2.06164	6.11121	6.12243	7.69226	7.98556	17.489	17.6285	23.4408	24.1792	41.808	42.0886	59.5604	58.8529
146.248	2.74121	2.76435	7.73901	7.69438	8.48657	8.83297	19.0767	19.0347	25.2144	25.776	45.0972	44.8243	61.8496	60.6457	1.96728	2.06323	6.11084	6.12652	7.69824	7.99085	17.4979	17.6397	23.4604	24.1946	41.8293	42.1132	59.5957	58.8815
146.348	2.7323	2.76624	7.74231	7.69935	8.48792	8.83882	19.0912	19.0467	25.2289	25.7926	45.1139	44.8499	61.8798	60.6753	1.96643	2.06482	6.1178	6.1306	7.70105	7.99614	17.4985	17.6509	23.4691	24.2101	41.8517	42.1377	59.6102	58.9102
146.448	2.74707	2.76813	7.74707	7.70433	8.49048	8.84467	19.1021	19.0588	25.2397	25.8092	45.1477	44.8754	61.9177	60.7049	1.96753	2.06641	6.11279	6.13469	7.7041	8.00143	17.5192	17.6621	23.4702	24.2255	41.8779	42.1622	59.6482	58.9388
146.548	2.7384	2.77002	7.75012	7.7093	8.50183	8.85052	19.1205	19.0709	25.2582	25.8259	45.1647	44.9009	61.9445	60.7346	1.9762	2.068	6.12561	6.13878	7.71082	8.00672	17.5378	17.6733	23.4906	24.2409	41.8969	42.1867	59.6749	58.9674
146.648	2.73926	2.77191	7.75464	7.71427	8.49658	8.85637	19.1333	19.0829	25.2827	25.8425	45.1968	44.9265	61.9822	60.7642	1.98315	2.06958	6.13623	6.14286	7.72144	8.01201	17.5397	17.6845	23.5054	24.2564	41.9229	42.2112	59.7009	58.9959
146.748	2.74109	2.7738	7.76257	7.71925	8.49475	8.86222	19.1488	19.095	25.2887	25.8591	45.2145	44.952	62.0138	60.7937	1.98499	2.07117	6.14417	6.14694	7.72571	8.01729	17.5573	17.6957	23.5209	24.2718	41.9503	42.2357	59.7401	59.0245
146.848	2.74524	2.77569	7.76868	7.72422	8.50037	8.86806	19.1549	19.107	25.3004	25.8757	45.2377	44.9775	62.0568	60.8233	1.97742	2.07276	6.15393	6.15103	7.73499	8.02257	17.576	17.7069	23.5306	24.2872	41.9796	42.2602	59.7716	59.053
146.948	2.74622	2.77757	7.78137	7.72919	8.50745	8.87391	19.1637	19.1191	25.3148	25.8922	45.274	45.003	62.0907	60.8529	1.97839	2.07435	6.16663	6.15511	7.74622	8.02786	17.5789	17.718	23.5436	24.3026	42.0062	42.2846	59.7899	59.0815
147.048	2.76074	2.77946	7.78418	7.73416	8.51025	8.87975	19.1782	19.1311	25.3354	25.9088	45.302	45.0285	62.1426	60.8824	1.98682	2.07593	6.16748	6.15919	7.75464	8.03314	17.598	17.7292	23.5637	24.318	42.0322	42.3091	59.8416	59.11
147.148	2.76453	2.78135	7.78796	7.73913	8.52576	8.88559	19.1918	19.1432	25.3568	25.9254	45.3258	45.054	62.1681	60.9119	1.99109	2.07752	6.17542	6.16327	7.75891	8.03842	17.6151	17.7404	23.5834	24.3334	42.0714	42.3336	59.869	59.1385
147.248	2.75793	2.78324	7.79309	7.74409	8.53455	8.89143	19.2084	19.1552	25.3717	25.942	45.3444	45.0795	62.202	60.9414	1.99011	2.07911	6.17639	6.16735	7.75793	8.0437	17.6207	17.7516	23.5944	24.3488	42.0883	42.358	59.8973	59.1669
147.348	2.75793	2.78512	7.79309	7.74906	8.5387	8.89727	19.2262	19.1673	25.3795	25.9586	45.3756	45.105	62.2374	60.9709	1.9823	2.08069	6.19397	6.17143	7.7616	8.04897	17.6432	17.7627	23.6	24.3642	42.1193	42.3825	59.9384	59.1954
147.448	2.75891	2.78701	7.80554	7.75403	8.54749	8.90311	19.235	19.1793	25.3861	25.9751	45.3961	45.1305	62.2714	61.0004	1.98694	2.08228	6.19324	6.17551	7.77234	8.05425	17.6531	17.7739	23.6302	24.3796	42.1417	42.4069	59.965	59.2238
147.548	2.75684	2.78889	7.80762	7.759	8.54541	8.90895	19.2385	19.1914	25.4019	25.9917	45.4172	45.156	62.3066	61.0298	1.98901	2.08387	6.20044	6.17959	7.78003	8.05952	17.6617	17.7851	23.6497	24.395	42.1709	42.4313	59.9998	59.2522
147.648	2.7655	2.79078	7.81628	7.76396	8.5658	8.91478	19.2631	19.2034	25.4127	26.0083	45.444	45.1814	62.3524	61.0592	1.99206	2.08545	6.21374	6.18367	7.78723	8.0648	17.6719	17.7962	23.6625	24.4104	42.1996	42.4558	60.0321	59.2806
147.748	2.76392	2.79266	7.82642	7.76893	8.56421	8.92061	19.2673	19.2154	25.4285	26.0248	45.4675	45.2069	62.3684	61.0887	1.98999	2.08704	6.20972	6.18774	7.77954	8.07007	17.6704	17.8074	23.6785	24.4258	42.2114	42.4802	60.0481	59.309
147.848	2.76245	2.79455	7.82129	7.77389	8.56275	8.92645	19.2739	19.2275	25.4312	26.0414	45.4875	45.2323	62.3945	61.1181	1.97925	2.08862	6.20264	6.19182	7.79175	8.07534	17.6891	17.8185	23.679	24.4412	42.2295	42.5046	60.0798	59.3373
147.948	2.7677	2.79643	7.8302	7.77886	8.56799	8.93228	19.2946	19.2395	25.4476	26.058	45.5143	45.2578	62.4347	61.1474	1.98596	2.0902	6.20984	6.1959	7.79895	8.08061	17.7059	17.8297	23.694	24.4565	42.2599	42.529	60.0985	59.3657
148.048	2.76672	2.79832	7.82922	7.78382	8.57483	8.93811	19.3109	19.2515	25.4642	26.0745	45.5446	45.2832	62.4706	61.1768	1.99475	2.09179	6.21033	6.19997	7.80164	8.08588	17.7079	17.8409	23.714	24.4719	42.2885	42.5534	60.1212	59.394
148.148	2.76868	2.8002	7.83484	7.78878	8.57678	8.94394	19.3268	19.2636	25.484	26.0911	45.566	45.3087	62.5099	61.2061	2.00085	2.09337	6.22253	6.20404	7.80774	8.09114	17.7223	17.852	23.7435	24.4873	42.3192	42.5778	60.1522	59.4223
148.248	2.7677	2.80208	7.84973	7.79374	8.59314	8.94976	19.3258	19.2756	25.5026	26.1076	45.5846	45.3341	62.5363	61.2355	1.99988	2.09496	6.21545	6.20812	7.81238	8.09641	17.734	17.8632	23.7565	24.5026	42.3363	42.6021	60.1847	59.4506
148.348	2.76184	2.80397	7.84387	7.7987	8.59338	8.95559	19.3353	19.2876	25.5101	26.1241	45.61	45.3595	62.5616	61.2648	1.98792	2.09654	6.21936	6.21219	7.81629	8.10167	17.7411	17.8743	23.7543	24.518	42.3536	42.6265	60.202	59.4789
148.448	2.76282	2.80585	7.84485	7.80366	8.59436	8.96141	19.3483	19.2996	25.5289	26.1407	45.6422	45.3849	62.5858	61.2941	1.99499	2.09812	6.2301	6.21626	7.82703	8.10693	17.7518	17.8855	23.7767	24.5333	42.3839	42.6509	60.2323	59.5071
148.548	2.75964	2.80773	7.84949	7.80862	8.59705	8.96724	19.3646	19.3117	25.5475	26.1572	45.6664	45.4103	62.6202	61.3234	1.99768	2.0997	6.23889	6.22033	7.83215	8.11219	17.7606	17.8966	23.7933	24.5487	42.4259	42.6752	60.2687	59.5354
148.648	2.76672	2.80961	7.86438	7.81358	8.60217	8.97306	19.3717	19.3237	25.5602	26.1737	45.6813	45.4357	62.6542	61.3526	2.00842	2.10128	6.24182	6.2244	7.83875	8.11745	17.7557	17.9077	23.8158	24.564	42.4484	42.6996	60.2928	59.5636
148.748	2.76184	2.81149	7.8595	7.81854	8.60901	8.97888	19.3746	19.3357	25.5668	26.1903	45.7076	45.4611	62.6788	61.3819	2.00964	2.10287	6.24304	6.22847	7.83997	8.12271	17.7672	17.9189	23.817	24.5794	42.4728	42.7239	60.329	59.5918
148.848	2.75964	2.81338	7.8573	7.8235	8.60877	8.9847	19.3805	19.3477	25.5768	26.2068	45.725	45.4865	62.712	61.4111	2.00745	2.10445	6.22913	6.23254	7.83777	8.12797	17.776	17.93	23.8226	24.5947	42.4845	42.7483	60.337	59.6199
148.948	2.76843	2.81526	7.87219	7.82846	8.61389	8.99052	19.391	19.3597	25.601	26.2233	45.7477	45.5119	62.7421	61.4403	2.01623	2.10603	6.23791	6.23661	7.84094	8.13322	17.7831	17.9411	23.8431	24.61	42.5111	42.7726	60.3651	59.6481
149.048	2.77747	2.81714	7.87292	7.83341	8.60901	8.99633	19.402	19.3717	25.6254	26.2398	45.7623	45.5372	62.7782	61.4695	2.01746	2.10761	6.24475	6.24067	7.84949	8.13848	17.7974	17.9523	23.8444	24.6254	42.5314	42.7969	60.3895	59.6763
149.148	2.7666	2.81902	7.87598	7.83837	8.61743	9.00215	19.4163	19.3837	25.6382	26.2563	45.7827	45.5626	62.8125	61.4987	2.00659	2.10919	6.24365	6.24474	7.85254	8.14373	17.8188	17.9634	23.8547	24.6407	42.5459	42.8212	60.4158	59.7044
149.248	2.77832	2.8209	7.89941	7.84332	8.6333	9.00796	19.4419	19.3958	25.6577	26.2728	45.8274	45.5879	62.8438	61.5279	2.01831	2.11077	6.25952	6.24881	7.86425	8.14898	17.8262	17.9745	23.8879	24.656	42.5869	42.8455	60.4531	59.7325
149.348	2.77734	2.82278	7.89844	7.84828	8.62866	9.01378	19.4373	19.4078	25.6704	26.2893	45.8442	45.6133	62.876	61.557	2.01367	2.11235	6.2605	6.25287	7.86328	8.15423	17.8365	17.9857	23.8875	24.6713	42.6116	42.8698	60.4717	59.7606
149.448	2.77454	2.82466	7.90125	7.85323	8.63904	9.01959	19.4457	19.4198	25.6774	26.3059	45.861	45.6386	62.8829	61.5861	2.00671	2.11393	6.25159	6.25694	7.86609	8.15948	17.8445	17.9968	23.8978	24.6866	42.6205	42.8941	60.5001	59.7887
149.548	2.77637	2.82653	7.90918	7.85819	8.64697	9.0254	19.4651	19.4318	25.6909	26.3223	45.894	45.664	62.916	61.6152	2.01221	2.11551	6.26318	6.261	7.87402	8.16473	17.8571	18.0079	23.9229	24.7019	42.6475	42.9184	60.5271	59.8167
149.648	2.77356	2.82841	7.90637	7.86314	8.64978	9.03121	19.4801	19.4438	25.6959	26.3388	45.9108	45.6893	62.9364	61.6443	2.01917	2.11709	6.27014	6.26506	7.87488	8.16997	17.8669	18.019	23.942	24.7172	42.6759	42.9427	60.5536	59.8447
149.748	2.77149	2.83029	7.91211	7.86809	8.65967	9.03701	19.478	19.4558	25.7153	26.3553	45.936	45.7146	62.9524	61.6734	2.00586	2.11866	6.2605	6.26912	7.87696	8.17522	17.8679	18.0301	23.9458	24.7325	42.6897	42.9669	60.5752	59.8728
149.848	2.76636	2.83217	7.91309	7.87304	8.65869	9.04282	19.4868	19.4678	25.7222	26.3718	45.9683	45.7399	62.9785	61.7025	2.00635	2.12024	6.26709	6.27319	7.87793	8.18046	17.8931	18.0413	23.9622	24.7478	42.7083	42.9912	60.5957	59.9008
149.948	2.78589	2.83405	7.92285	7.87799	8.66846	9.04862	19.512	19.4798	25.7493	26.3883	45.9976	45.7652	63.0156	61.7315	2.02588	2.12182	6.28296	6.27725	7.90503	8.1857	17.9088	18.0524	23.9858	24.7631	42.7432	43.0154	60.6423	59.9288
150.048	2.78821	2.83592	7.92102	7.88294	8.66663	9.05443	19.526	19.4917	25.7731	26.4048	46.0189	45.7905	63.0372	61.7605	2.0282	2.1234	6.27698	6.28131	7.91296	8.19094	17.9072	18.0635	24.0013	24.7784	42.7628	43.0397	60.6698	59.9567
150.148	2.78052	2.8378	7.92505	7.88789	8.67627	9.06023	19.5317	19.5037	25.7732	26.4212	46.0466	45.8158	63.0569	61.7895	2.02612	2.12497	6.27905	6.28536	7.90942	8.19618	17.9302	18.0746	24.0115	24.7937	42.7922	43.0639	60.6858	59.9847
150.248	2.77832	2.83968	7.93433	7.89284	8.69165	9.06603	19.5552	19.5157	25.7905	26.4377	46.0718	45.8411	63.0876	61.8185	2.0415	2.12655	6.29443	6.28942	7.91504	8.20142	17.9459	18.0857	24.0286	24.809	42.8157	43.0881	60.7283	60.0126
150.348	2.7821	2.84155	7.93665	7.89779	8.69397	9.07183	19.5612	19.5277	25.8082	26.4542	46.0951	45.8664	63.1232	61.8475	2.04163	2.12813	6.29065	6.29348	7.91882	8.20665	17.9579	18.0968	24.0426	24.8242	42.837	43.1124	60.7557	60.0405
150.448	2.78796	2.84343	7.93835	7.90274	8.70349	9.07763	19.5609	19.5397	25.816	26.4706	46.1168	45.8917	63.1505	61.8765	2.04382	2.1297	6.29285	6.29754	7.92468	8.21189	17.9653	18.1079	24.0521	24.8395	42.8568	43.1366	60.7811	60.0684
150.548	2.79394	2.8453	7.9541	7.90768	8.71143	9.08343	19.5842	19.5517	25.8411	26.4871	46.1499	45.9169	63.1755	61.9054	2.04932	2.13128	6.30395	6.30159	7.93066	8.21712	17.9764	18.119	24.0718	24.8548	42.8838	43.1608	60.8086	60.0963
150.648	2.79114	2.84718	7.95129	7.91263	8.71228	9.08922	19.5875	19.5637	25.8502	26.5036	46.1666	45.9422	63.2137	61.9343	2.05066	2.13285	6.30359	6.30565	7.93347	8.22236	17.9823	18.1301	24.0804	24.87	42.9025	43.185	60.829	60.1242
150.748	2.79089	2.84905	7.9491	7.91757	8.72791	9.09501	19.5931	19.5756	25.8617	26.52	46.184	45.9674	63.2413	61.9632	2.05042	2.13443	6.29773	6.3097	7.93372	8.22759	17.9801	18.1412	24.0905	24.8853	42.9259	43.2092	60.8524	60.152
150.848	2.79114	2.85093	7.94739	7.92252	8.72815	9.10081	19.6088	19.5876	25.8871	26.5365	46.2018	45.9927	63.2587	61.9921	2.05066	2.13601	6.30115	6.31376	7.93933	8.23282	17.9908	18.1523	24.098	24.9005	42.9457	43.2334	60.8798	60.1798
150.948	2.79578	2.8528	7.94836	7.92746	8.72913	9.1066	19.6237	19.5996	25.902	26.5529	46.2279	46.0179	63.295	62.021	2.05164	2.13758	6.31238	6.31781	7.94226	8.23804	18.0084	18.1634	24.1168	24.9158	42.9718	43.2575	60.9178	60.2076
151.048	2.80164	2.85467	7.96179	7.93241	8.72522	9.11239	19.6371	19.6116	25.9252	26.5694	46.2535	46.0432	63.3107	62.0498	2.04163	2.13915	6.31409	6.32187	7.94446	8.24327	18.0239	18.1745	24.1283	24.931	42.9894	43.2817	60.9513	60.2354
151.148	2.80566	2.85655	7.96582	7.93735	8.73096	9.11818	19.6411	19.6235	25.9351	26.5858	46.2788	46.0684	63.3455	62.0787	2.04932	2.14073	6.31006	6.32592	7.94604	8.2485	18.0311	18.1856	24.1382	24.9463	43.011	43.3059	60.978	60.2632
151.248	2.80676	2.85842	7.96692	7.94229	8.73572	9.12396	19.6576	19.6355	25.9479	26.6022	46.2916	46.0936	63.3895	62.1075	2.05457	2.1423	6.32092	6.32997	7.95129	8.25372	18.037	18.1966	24.1449	24.9615	43.0255	43.33	61.0089	60.2909
151.348	2.79285	2.86029	7.96472	7.94723	8.73962	9.12975	19.6637	19.6475	25.9554	26.6187	46.3053	46.1188	63.4208	62.1363	2.06604	2.14387	6.31702	6.33402	7.95886	8.25894	18.0513	18.2077	24.1569	24.9767	43.049	43.3542	61.0399	60.3187
151.448	2.79785	2.86216	7.98315	7.95217	8.7583	9.13554	19.6702	19.6594	25.9741	26.6351	46.3374	46.144	63.457	62.1651	2.06128	2.14545	6.31592	6.33807	7.96582	8.26416	18.0651	18.2188	24.1692	24.992	43.083	43.3783	61.0701	60.3464
151.548	2.80749	2.86404	7.99329	7.95711	8.76233	9.14132	19.692	19.6714	25.9977	26.6515	46.3666	46.1692	63.4923	62.1938	2.06897	2.14702	6.32971	6.34212	7.97546	8.26938	18.0643	18.2299	24.1891	25.0072	43.1127	43.4024	61.1034	60.3741
151.648	2.80872	2.86591	7.9884	7.96205	8.76306	9.1471	19.6986	19.6833	26.016	26.6679	46.3873	46.1944	63.5148	62.2226	2.07385	2.14859	6.3346	6.34616	7.98035	8.2746	18.0758	18.241	24.1976	25.0224	43.1193	43.4266	61.1278	60.4018
151.748	2.79504	2.86778	7.99426	7.96699	8.77503	9.15288	19.7086	19.6953	26.026	26.6843	46.401	46.2196	63.5284	62.2513	2.0741	2.15016	6.33484	6.35021	7.99036	8.27982	18.0944	18.252	24.2174	25.0376	43.1371	43.4507	61.1434	60.4294
151.848	2.80164	2.86965	7.9989	7.97193	8.77966	9.15866	19.7152	19.7073	26.0465	26.7007	46.4252	46.2448	63.5607	62.28	2.07874	2.15173	6.33167	6.35426	7.99695	8.28504	18.0946	18.2631	24.2357	25.0528	43.1615	43.4748	61.1779	60.4571
151.948	2.80383	2.87152	7.99914	7.97687	8.78552	9.16444	19.7252	19.7192	26.056	26.7172	46.4567	46.2699	63.5819	62.3087	2.08459	2.15331	6.33752	6.35831	8.00281	8.29025	18.1071	18.2742	24.2533	25.0681	43.1827	43.4989	61.2089	60.4847
152.048	2.79895	2.87339	7.99988	7.9818	8.79456	9.17022	19.7203	19.7312	26.069	26.7336	46.4847	46.2951	63.6144	62.3374	2.08948	2.15488	6.34436	6.36235	8.00208	8.29546	18.1277	18.2852	24.2604	25.0833	43.2035	43.523	61.2333	60.5123
152.148	2.80542	2.87526	8.0166	7.98674	8.80103	9.17599	19.7349	19.7431	26.0913	26.75	46.5171	46.3202	63.6484	62.3661	2.08862	2.15645	6.35693	6.3664	8.00488	8.30068	18.1313	18.2963	24.2749	25.0985	43.2197	43.5471	61.2673	60.5399
152.248	2.81519	2.87713	8.0166	7.99167	8.80518	9.18177	19.7463	19.7551	26.1108	26.7664	46.5481	46.3454	63.6758	62.3947	2.09424	2.15802	6.35498	6.37044	8.00488	8.30589	18.1415	18.3074	24.2883	25.1136	43.2375	43.5711	61.3047	60.5675
152.348	2.81946	2.879	8.02039	7.99661	8.82068	9.18754	19.7604	19.767	26.1244	26.7827	46.5699	46.3705	63.7089	62.4233	2.10413	2.15959	6.35925	6.37448	8.00867	8.31109	18.1567	18.3184	24.308	25.1288	43.2589	43.5952	61.326	60.595
152.448	2.80933	2.88087	8.03613	8.00154	8.82471	9.19331	19.7756	19.7789	26.1399	26.7991	46.6047	46.3957	63.7422	62.452	2.11182	2.16116	6.34912	6.37853	8.0127	8.3163	18.1676	18.3295	24.3179	25.144	43.2805	43.6193	61.3533	60.6226
152.548	2.81457	2.88273	8.02551	8.00648	8.82581	9.19908	19.7906	19.7909	26.1588	26.8155	46.6315	46.4208	63.7706	62.4805	2.10535	2.16273	6.35999	6.38257	8.01746	8.32151	18.1776	18.3405	24.3363	25.1592	43.3068	43.6433	61.3917	60.6501
152.648	2.81824	2.8846	8.03894	8.01141	8.83167	9.20485	19.7887	19.8028	26.1764	26.8319	46.6527	46.4459	63.7999	62.5091	2.10901	2.1643	6.3678	6.38661	8.02527	8.32672	18.1802	18.3516	24.36	25.1744	43.3226	43.6674	61.4052	60.6776
152.748	2.82129	2.88647	8.04004	8.01634	8.82861	9.21062	19.801	19.8148	26.1929	26.8483	46.6733	46.471	63.822	62.5377	2.11572	2.16586	6.37451	6.39065	8.03198	8.33192	18.201	18.3626	24.3723	25.1896	43.3506	43.6914	61.4314	60.7051
152.848	2.82434	2.88834	8.04309	8.02127	8.83533	9.21638	19.8217	19.8267	26.2076	26.8647	46.7054	46.4961	63.8624	62.5662	2.12292	2.16743	6.38147	6.39469	8.03918	8.33712	18.2018	18.3737	24.3873	25.2047	43.3695	43.7154	61.4601	60.7325
152.948	2.81946	2.8902	8.04382	8.0262	8.84265	9.22215	19.8346	19.8386	26.2142	26.881	46.7262	46.5212	63.8849	62.5947	2.12366	2.169	6.38635	6.39873	8.03992	8.34232	18.2118	18.3847	24.3998	25.2199	43.3898	43.7395	61.4784	60.76
153.048	2.81555	2.89207	8.04602	8.03113	8.83459	9.22791	19.8307	19.8506	26.234	26.8974	46.7418	46.5463	63.9044	62.6232	2.11414	2.17057	6.39221	6.40276	8.04773	8.34752	18.2223	18.3958	24.4135	25.2351	43.4115	43.7635	61.5038	60.7874
153.148	2.80261	2.89394	8.05286	8.03606	8.83337	9.23367	19.851	19.8625	26.2408	26.9138	46.7601	46.5714	63.9305	62.6517	2.10925	2.17213	6.38171	6.4068	8.04895	8.35272	18.2206	18.4068	24.4244	25.2502	43.4298	43.7875	61.5302	60.8148
153.248	2.80652	2.8958	8.047	8.04099	8.83948	9.23943	19.8512	19.8744	26.2428	26.9301	46.7836	46.5965	63.9601	62.6802	2.10706	2.1737	6.37952	6.41084	8.04675	8.35792	18.2368	18.4178	24.4264	25.2654	43.4572	43.8115	61.5653	60.8422
153.348	2.81543	2.89767	8.06128	8.04592	8.8479	9.24519	19.8735	19.8864	26.2747	26.9465	46.812	46.6215	63.9941	62.7087	2.11182	2.17527	6.39209	6.41487	8.05371	8.36311	18.2622	18.4289	24.4465	25.2805	43.4739	43.8355	61.5974	60.8696
153.448	2.823	2.89953	8.07495	8.05085	8.86963	9.25095	19.8811	19.8983	26.2925	26.9628	46.8354	46.6466	64.0232	62.7371	2.12183	2.17683	6.39795	6.41891	8.07495	8.36831	18.2762	18.4399	24.4683	25.2957	43.4973	43.8595	61.6306	60.897
153.548	2.8175	2.9014	8.07922	8.05577	8.8678	9.25671	19.9008	19.9102	26.3102	26.9792	46.8588	46.6717	64.047	62.7655	2.11999	2.1784	6.39416	6.42294	8.08289	8.3735	18.278	18.4509	24.4799	25.3108	43.5187	43.8834	61.6525	60.9243
153.648	2.81921	2.90326	8.08704	8.0607	8.86389	9.26246	19.9108	19.9221	26.3236	26.9955	46.8959	46.6967	64.0626	62.7939	2.11975	2.17997	6.40002	6.42698	8.08313	8.37869	18.2906	18.462	24.5016	25.3259	43.5363	43.9074	61.6798	60.9516
153.748	2.82605	2.90513	8.08582	8.06562	8.87634	9.26822	19.9176	19.934	26.3444	27.0119	46.9147	46.7217	64.089	62.8223	2.12463	2.18153	6.40491	6.43101	8.08386	8.38388	18.2974	18.473	24.5084	25.3411	43.5687	43.9314	61.6884	60.9789
153.848	2.8291	2.90699	8.08691	8.07055	8.87939	9.27397	19.926	19.9459	26.3491	27.0282	46.9368	46.7468	64.1169	62.8507	2.12769	2.1831	6.40796	6.43504	8.08692	8.38907	18.3188	18.484	24.5168	25.3562	43.5735	43.9553	61.7185	61.0062
153.948	2.83276	2.90885	8.08691	8.07547	8.88721	9.27972	19.9302	19.9579	26.3762	27.0445	46.9624	46.7718	64.1462	62.879	2.1333	2.18466	6.40942	6.43907	8.08691	8.39426	18.3241	18.4951	24.5327	25.3713	43.593	43.9793	61.7478	61.0335
154.048	2.83801	2.91072	8.08801	8.0804	8.88831	9.28548	19.943	19.9698	26.3893	27.0609	46.9948	46.7968	64.1847	62.9073	2.1405	2.18623	6.42859	6.4431	8.09167	8.39944	18.3345	18.5061	24.5472	25.3864	43.6193	44.0032	61.7745	61.0607
154.148	2.84058	2.91258	8.09839	8.08532	8.90063	9.29122	19.9456	19.9817	26.3979	27.0772	47.0149	46.8218	64.2012	62.9357	2.14111	2.18779	6.42334	6.44713	8.09839	8.40463	18.3582	18.5171	24.5503	25.4016	43.6418	44.0272	61.7947	61.088
154.248	2.85254	2.91444	8.11035	8.09024	8.91846	9.29697	19.977	19.9936	26.4233	27.0935	47.0444	46.8468	64.2383	62.9639	2.15112	2.18935	6.42725	6.45116	8.11816	8.40981	18.3619	18.5281	24.5679	25.4167	43.6594	44.0511	61.8298	61.1152
154.348	2.85437	2.9163	8.10852	8.09516	8.91663	9.30272	19.9869	20.0055	26.4349	27.1098	47.0795	46.8718	64.2677	62.9922	2.15491	2.19092	6.43518	6.45519	8.12195	8.41499	18.3632	18.5391	24.5778	25.4318	43.6808	44.075	61.8536	61.1424
154.448	2.85364	2.91817	8.11536	8.10008	8.91736	9.30846	19.9935	20.0174	26.4479	27.1261	47.1002	46.8968	64.2902	63.0205	2.15613	2.19248	6.44006	6.45922	8.12683	8.42017	18.3688	18.5501	24.5765	25.4469	43.6996	44.0989	61.8776	61.1695
154.548	2.85339	2.92003	8.1095	8.105	8.92932	9.31421	20.0035	20.0293	26.4535	27.1424	47.1139	46.9218	64.3212	63.0487	2.13855	2.19404	6.43225	6.46325	8.12512	8.42535	18.3872	18.5611	24.5826	25.462	43.7111	44.1228	61.9015	61.1967
154.648	2.85645	2.92189	8.10645	8.10992	8.92627	9.31995	20.0083	20.0412	26.4626	27.1587	47.134	46.9468	64.3555	63.077	2.13916	2.19561	6.4353	6.46727	8.12769	8.43053	18.3933	18.5722	24.5969	25.4771	43.7336	44.1467	61.9236	61.2238
154.748	2.85645	2.92375	8.11206	8.11484	8.92627	9.32569	20.0139	20.0531	26.4739	27.1751	47.1616	46.9718	64.3865	63.1052	2.1355	2.19717	6.43896	6.4713	8.13745	8.43571	18.407	18.5832	24.6108	25.4922	43.749	44.1706	61.9568	61.2509
154.848	2.8623	2.92561	8.12402	8.11976	8.93994	9.33143	20.0376	20.065	26.4917	27.1914	47.1948	46.9967	64.4082	63.1334	2.14697	2.19873	6.45459	6.47532	8.15307	8.44088	18.4137	18.5942	24.6167	25.5073	43.7786	44.1945	61.9941	61.2781
154.948	2.85364	2.92747	8.12707	8.12468	8.94299	9.33717	20.0638	20.0769	26.5199	27.2076	47.2152	47.0217	64.4503	63.1615	2.15613	2.20029	6.46155	6.47935	8.17395	8.44606	18.4303	18.6052	24.6351	25.5223	43.8068	44.2183	62.0223	61.3051
155.048	2.85242	2.92933	8.12219	8.1296	8.93811	9.3429	20.0709	20.0888	26.5328	27.2239	47.2438	47.0466	64.465	63.1897	2.15124	2.20185	6.46643	6.48337	8.17273	8.45123	18.4325	18.6162	24.64	25.5374	43.8275	44.2422	62.0507	61.3322
155.148	2.85828	2.93119	8.12195	8.13451	8.94592	9.34864	20.0787	20.1007	26.5485	27.2402	47.2633	47.0716	64.4979	63.2178	2.13928	2.20341	6.47229	6.48739	8.17297	8.4564	18.4458	18.6272	24.6556	25.5525	43.8351	44.266	62.076	61.3593
155.248	2.86231	2.93305	8.12402	8.13943	8.94385	9.35437	20.094	20.1126	26.5581	27.2565	47.2747	47.0965	64.5332	63.2459	2.14136	2.20497	6.47998	6.49142	8.17651	8.46157	18.4634	18.6382	24.675	25.5676	43.8606	44.2899	62.0996	61.3863
155.348	2.8623	2.93491	8.13745	8.14434	8.95166	9.36011	20.1001	20.1244	26.5776	27.2728	47.3003	47.1214	64.5642	63.274	2.14136	2.20653	6.47803	6.49544	8.18262	8.46674	18.4695	18.6491	24.6909	25.5826	43.8801	44.3137	62.1228	61.4133
155.448	2.86792	2.93676	8.14355	8.14926	8.96704	9.36584	20.1079	20.1363	26.5891	27.2891	47.3235	47.1464	64.5879	63.3021	2.14697	2.20809	6.48779	6.49946	8.18628	8.4719	18.4706	18.6601	24.6965	25.5977	43.9053	44.3376	62.1465	61.4403
155.548	2.87512	2.93862	8.16003	8.15417	8.97229	9.37157	20.1207	20.1482	26.6061	27.3053	47.3483	47.1713	64.6202	63.3302	2.15417	2.20965	6.49084	6.50348	8.19153	8.47707	18.486	18.6711	24.7152	25.6127	43.9357	44.3614	62.1727	61.4673
155.648	2.87317	2.94048	8.16223	8.15908	8.97034	9.3773	20.1266	20.1601	26.6293	27.3216	47.3776	47.1962	64.663	63.3582	2.15222	2.21121	6.50061	6.5075	8.19519	8.48223	18.5005	18.6821	24.7291	25.6278	43.9513	44.3852	62.202	61.4942
155.748	2.87378	2.94234	8.16479	8.16399	8.96729	9.38303	20.1409	20.172	26.6401	27.3379	47.3997	47.2211	64.6973	63.3863	2.15479	2.21277	6.50732	6.51152	8.19824	8.4874	18.501	18.6931	24.7395	25.6428	43.9778	44.409	62.2205	61.5211
155.848	2.87427	2.94419	8.16724	8.16891	8.97534	9.38875	20.1511	20.1838	26.6538	27.3541	47.4175	47.246	64.7131	63.4143	2.15308	2.21433	6.50171	6.51553	8.2002	8.49256	18.5203	18.7041	24.7537	25.6579	43.9937	44.4328	62.2483	61.5481
155.948	2.88745	2.94605	8.1748	8.17382	8.99072	9.39448	20.1704	20.1957	26.6907	27.3704	47.4604	47.2708	64.7402	63.4423	2.16479	2.21589	6.51904	6.51955	8.22534	8.49772	18.5259	18.715	24.7649	25.6729	44.0264	44.4566	62.2793	61.575
156.048	2.89355	2.94791	8.1748	8.17873	8.99634	9.4002	20.1741	20.2076	26.7065	27.3867	47.4934	47.2957	64.7715	63.4703	2.17041	2.21745	6.521	6.52357	8.22168	8.50288	18.5376	18.726	24.7825	25.688	44.0557	44.4804	62.3044	61.6019
156.148	2.8877	2.94976	8.18433	8.18364	8.99658	9.40592	20.1919	20.2195	26.7085	27.4029	47.5132	47.3206	64.7888	63.4982	2.17066	2.219	6.5249	6.52758	8.22363	8.50803	18.5593	18.737	24.7944	25.703	44.0657	44.5042	62.3279	61.6287
156.248	2.89722	2.95162	8.19067	8.18854	9.01416	9.41164	20.2095	20.2313	26.7261	27.4191	47.5386	47.3455	64.8301	63.5262	2.18017	2.22056	6.54053	6.5316	8.22949	8.51319	18.5604	18.748	24.8118	25.718	44.0911	44.5279	62.363	61.6556
156.348	2.90247	2.95347	8.1991	8.19345	9.02307	9.41736	20.2184	20.2432	26.7406	27.4354	47.5668	47.3703	64.8585	63.5541	2.18542	2.22212	6.54773	6.53561	8.23621	8.51834	18.5747	18.7589	24.8344	25.733	44.1173	44.5517	62.3898	61.6824
156.448	2.89941	2.95533	8.2002	8.19836	9.02002	9.42308	20.2271	20.2551	26.759	27.4516	47.6008	47.3952	64.8923	63.582	2.18799	2.22367	6.53662	6.53962	8.23926	8.5235	18.5927	18.7699	24.843	25.7481	44.1282	44.5754	62.418	61.7092
156.548	2.90344	2.95718	8.20984	8.20327	9.03577	9.4288	20.2389	20.2669	26.7867	27.4679	47.6227	47.42	64.9452	63.6099	2.1864	2.22523	6.55041	6.54364	8.24695	8.52865	18.5896	18.7809	24.8685	25.7631	44.1476	44.5992	62.4452	61.736
156.648	2.90039	2.95904	8.21289	8.20817	9.03638	9.43451	20.2532	20.2788	26.7954	27.4841	47.647	47.4448	64.958	63.6377	2.18335	2.22679	6.55347	6.54765	8.26538	8.5338	18.6022	18.7918	24.8831	25.7781	44.1738	44.6229	62.4714	61.7628
156.748	2.89758	2.96089	8.21375	8.21308	9.04553	9.44023	20.2509	20.2906	26.806	27.5003	47.6791	47.4697	64.9865	63.6656	2.1842	2.22834	6.55627	6.55166	8.26868	8.53895	18.6216	18.8028	24.9017	25.7931	44.1967	44.6467	62.4943	61.7895
156.848	2.90503	2.96274	8.21973	8.21798	9.04736	9.44594	20.2717	20.3025	26.8335	27.5165	47.7102	47.4945	65.0156	63.6934	2.19019	2.2299	6.56006	6.55567	8.27417	8.5441	18.6288	18.8137	24.9155	25.8081	44.2139	44.6704	62.5212	61.8163
156.948	2.91223	2.9646	8.22083	8.22289	9.06018	9.45165	20.2985	20.3143	26.8463	27.5328	47.7369	47.5193	65.0419	63.7213	2.19128	2.23145	6.57092	6.55968	8.28503	8.54924	18.6433	18.8247	24.934	25.8231	44.2386	44.6941	62.5516	61.843
157.048	2.91504	2.96645	8.23535	8.22779	9.06299	9.45737	20.3013	20.3262	26.8606	27.549	47.7766	47.5441	65.082	63.7491	2.19409	2.23301	6.5835	6.56369	8.29395	8.55439	18.6475	18.8357	24.9429	25.8381	44.2666	44.7178	62.5781	61.8697
157.148	2.91138	2.9683	8.23731	8.23269	9.07275	9.46307	20.3093	20.338	26.8728	27.5652	47.7986	47.5689	65.123	63.7768	2.19605	2.23456	6.57788	6.5677	8.29395	8.55953	18.647	18.8466	24.9507	25.8531	44.2886	44.7415	62.6113	61.8964
157.248	2.90723	2.97015	8.23926	8.2376	9.07471	9.46878	20.3167	20.3499	26.8938	27.5814	47.8176	47.5937	65.1482	63.8046	2.198	2.23611	6.5835	6.5717	8.30176	8.56468	18.6761	18.8576	24.9624	25.8681	44.3132	44.7652	62.6365	61.923
157.348	2.9303	2.972	8.25256	8.2425	9.09412	9.47449	20.3402	20.3617	26.9193	27.5976	47.849	47.6185	65.1913	63.8323	2.20154	2.23767	6.60095	6.57571	8.31506	8.56982	18.6816	18.8685	24.9835	25.883	44.3507	44.7889	62.6678	61.9497
157.448	2.92602	2.97386	8.25806	8.2474	9.08569	9.48019	20.3396	20.3736	26.9224	27.6138	47.8718	47.6433	65.2024	63.8601	2.20288	2.23922	6.59058	6.57972	8.31274	8.57496	18.6882	18.8794	24.9966	25.898	44.354	44.8126	62.6885	61.9763
157.548	2.9148	2.97571	8.25659	8.2523	9.08057	9.4859	20.3462	20.3854	26.9387	27.63	47.8784	47.668	65.2363	63.8878	2.20386	2.24077	6.59522	6.58372	8.31323	8.5801	18.7117	18.8904	25.0073	25.913	44.374	44.8362	62.7126	62.0029
157.648	2.93262	2.97756	8.27246	8.2572	9.104	9.4916	20.3713	20.3973	26.9644	27.6462	47.9097	47.6928	65.2849	63.9155	2.21557	2.24233	6.61084	6.58773	8.33472	8.58523	18.7195	18.9013	25.0325	25.928	44.4114	44.8599	62.748	62.0295
157.748	2.93872	2.97941	8.26685	8.2621	9.10986	9.4973	20.3835	20.4091	26.9705	27.6624	47.9314	47.7175	65.3049	63.9432	2.21558	2.24388	6.61499	6.59173	8.33325	8.59037	18.7195	18.9123	25.0525	25.9429	44.4253	44.8835	62.7754	62.056
157.848	2.93262	2.98126	8.26636	8.26699	9.10791	9.503	20.3774	20.4209	26.9722	27.6786	47.9487	47.7423	65.3301	63.9708	2.21924	2.24543	6.61304	6.59573	8.33277	8.5955	18.7369	18.9232	25.0464	25.9579	44.4424	44.9072	62.7988	62.0826
157.948	2.93835	2.98311	8.28625	8.27189	9.10998	9.5087	20.399	20.4328	26.9916	27.6948	47.9781	47.767	65.3671	63.9984	2.21374	2.24698	6.62073	6.59974	8.34094	8.60064	18.7506	18.9341	25.0658	25.9728	44.4855	44.9308	62.8241	62.1091
158.048	2.9386	2.98496	8.28601	8.27679	9.12341	9.5144	20.3951	20.4446	27.0133	27.7109	47.9938	47.7918	65.3868	64.0261	2.20984	2.24854	6.6322	6.60374	8.35242	8.60577	18.7518	18.9451	25.0795	25.9878	44.5072	44.9544	62.8495	62.1356
158.148	2.93933	2.9868	8.28528	8.28168	9.13245	9.52009	20.4135	20.4564	27.0201	27.7271	48.0201	47.8165	65.4071	64.0537	2.21057	2.25009	6.62586	6.60774	8.35168	8.6109	18.7635	18.956	25.0905	26.0027	44.5255	44.9781	62.8759	62.1621
158.248	2.94543	2.98865	8.28528	8.28658	9.13806	9.52578	20.4139	20.4682	27.0316	27.7433	48.0453	47.8412	65.4406	64.0813	2.22034	2.25164	6.6217	6.61174	8.35168	8.61603	18.772	18.9669	25.1078	26.0177	44.547	45.0017	62.9169	62.1886
158.348	2.94238	2.9905	8.28223	8.29148	9.14111	9.53148	20.4221	20.4801	27.0444	27.7594	48.0679	47.8659	65.4609	64.1088	2.22144	2.25319	6.62842	6.61574	8.35425	8.62115	18.7878	18.9778	25.1223	26.0326	44.5696	45.0253	62.9258	62.2151
158.448	2.948	2.99235	8.28784	8.29637	9.15649	9.53717	20.4341	20.4919	27.0579	27.7756	48.0991	47.8906	65.4919	64.1364	2.20972	2.25474	6.64014	6.61974	8.36035	8.62628	18.7832	18.9888	25.146	26.0476	44.5891	45.0489	62.9626	62.2415
158.548	2.94946	2.9942	8.29712	8.30126	9.15601	9.54286	20.4412	20.5037	27.071	27.7918	48.114	47.9153	65.511	64.1639	2.21069	2.25629	6.64526	6.62373	8.35938	8.6314	18.7877	18.9997	25.147	26.0625	44.5999	45.0725	62.9873	62.2679
158.648	2.94617	2.99604	8.29749	8.30616	9.16052	9.54855	20.4496	20.5155	27.0909	27.8079	48.1302	47.94	65.5446	64.1914	2.2135	2.25784	6.6344	6.62773	8.36023	8.63653	18.8053	19.0106	25.1652	26.0774	44.6281	45.0961	63.0077	62.2943
158.748	2.95789	2.99789	8.3136	8.31105	9.1781	9.55424	20.4576	20.5273	27.1127	27.8241	48.1617	47.9647	65.5704	64.2189	2.21375	2.25939	6.64392	6.63173	8.36047	8.64165	18.8269	19.0215	25.1891	26.0923	44.6534	45.1196	63.0331	62.3207
158.848	2.96582	2.99974	8.323	8.31594	9.19165	9.55992	20.4788	20.5392	27.1304	27.8402	48.1887	47.9894	65.6055	64.2464	2.22119	2.26093	6.65796	6.63572	8.36987	8.64677	18.8384	19.0324	25.2063	26.1073	44.675	45.1432	63.0662	62.3471
158.948	2.96582	3.00158	8.3291	8.32083	9.20752	9.56561	20.4927	20.551	27.1536	27.8564	48.2124	48.014	65.6423	64.2738	2.23096	2.26248	6.66357	6.63972	8.37598	8.65189	18.8481	19.0433	25.2297	26.1222	44.7119	45.1667	63.1072	62.3734
159.048	2.96582	3.00343	8.33276	8.32572	9.22095	9.57129	20.4983	20.5628	27.175	27.8725	48.2319	48.0387	65.6716	64.3013	2.22925	2.26403	6.66553	6.64371	8.37598	8.65701	18.8719	19.0542	25.2512	26.1371	44.7295	45.1903	63.1328	62.3997
159.148	2.9718	3.00527	8.34289	8.33061	9.23303	9.57697	20.5221	20.5746	27.1949	27.8886	48.2574	48.0633	65.7013	64.3287	2.23889	2.26558	6.68127	6.64771	8.38757	8.66213	18.8749	19.0652	25.2692	26.152	44.7592	45.2138	63.162	62.4261
159.248	2.96692	3.00712	8.34363	8.3355	9.22815	9.58266	20.5172	20.5864	27.2018	27.9048	48.276	48.088	65.7238	64.3561	2.23816	2.26713	6.68005	6.6517	8.39661	8.66724	18.8835	19.0761	25.2816	26.1669	44.7855	45.2374	63.173	62.4523
159.348	2.9812	3.00896	8.34668	8.34039	9.22876	9.58834	20.5374	20.5982	27.2183	27.9209	48.2981	48.1126	65.752	64.3835	2.24072	2.26867	6.68726	6.65569	8.39722	8.67235	18.8885	19.087	25.2961	26.1818	44.8076	45.2609	63.2029	62.4786
159.448	2.9845	3.01081	8.35168	8.34528	9.24182	9.59401	20.5387	20.61	27.2191	27.937	48.3209	48.1373	65.786	64.4109	2.24402	2.27022	6.69006	6.65968	8.39856	8.67747	18.9009	19.0979	25.3092	26.1967	44.8263	45.2844	63.2296	62.5049
159.548	2.98145	3.01265	8.34863	8.35016	9.24439	9.59969	20.5435	20.6218	27.2397	27.9532	48.3452	48.1619	65.8086	64.4382	2.24097	2.27177	6.68897	6.66367	8.40112	8.68258	18.9109	19.1088	25.3196	26.2116	44.8525	45.3079	63.2595	62.5311
159.648	2.9873	3.0145	8.36011	8.35505	9.26416	9.60537	20.561	20.6336	27.2629	27.9693	48.386	48.1865	65.8457	64.4655	2.25244	2.27331	6.70459	6.66766	8.41675	8.68769	18.9341	19.1196	25.3433	26.2264	44.8723	45.3314	63.2832	62.5573
159.748	2.99683	3.01634	8.37573	8.35993	9.27002	9.61104	20.5842	20.6454	27.2883	27.9854	48.4155	48.2111	65.8748	64.4929	2.2644	2.27486	6.7085	6.67165	8.42676	8.69279	18.9536	19.1305	25.3606	26.2413	44.9014	45.3549	63.3123	62.5835
159.848	3.00098	3.01818	8.37988	8.36482	9.28174	9.61671	20.6018	20.6572	27.3062	28.0015	48.4351	48.2357	65.8984	64.5202	2.25269	2.27641	6.71826	6.67564	8.42676	8.6979	18.9735	19.1414	25.3765	26.2562	44.929	45.3784	63.3359	62.6097
159.948	3.00305	3.02003	8.38757	8.3697	9.28748	9.62239	20.6198	20.669	27.3314	28.0176	48.474	48.2603	65.9318	64.5474	2.25842	2.27795	6.7301	6.67963	8.43445	8.70301	18.9829	19.1523	25.3959	26.2711	44.964	45.4019	63.3632	62.6359
160.048	3.00098	3.02187	8.40332	8.37459	9.29736	9.62806	20.6218	20.6808	27.3452	28.0337	48.4897	48.2849	65.957	64.5747	2.2605	2.2795	6.72046	6.68362	8.43848	8.70811	19.0084	19.1632	25.4077	26.2859	44.9797	45.4254	63.3904	62.662
160.148	3.01062	3.02371	8.41101	8.37947	9.31872	9.63372	20.6334	20.6926	27.3571	28.0498	48.5211	48.3095	65.9806	64.6019	2.27014	2.28104	6.7301	6.6876	8.44617	8.71322	19.0135	19.1741	25.4235	26.3008	45.0033	45.4488	63.4298	62.6881
160.248	3.01575	3.02555	8.41418	8.38435	9.32385	9.63939	20.6361	20.7044	27.3756	28.0659	48.5397	48.3341	66.0109	64.6292	2.27527	2.28258	6.73108	6.69159	8.44934	8.71832	19.022	19.185	25.434	26.3156	45.0219	45.4723	63.454	62.7142
160.348	3.0127	3.02739	8.41675	8.38923	9.32861	9.64506	20.645	20.7161	27.3782	28.082	48.5637	48.3586	66.0273	64.6564	2.2644	2.28413	6.73779	6.69557	8.45801	8.72342	19.035	19.1958	25.4524	26.3305	45.0537	45.4957	63.4766	62.7403
160.448	3.02161	3.02923	8.42004	8.39411	9.33752	9.65072	20.6539	20.7279	27.401	28.0981	48.598	48.3832	66.0614	64.6836	2.26526	2.28567	6.74109	6.69956	8.4491	8.72852	19.0438	19.2067	25.4635	26.3454	45.0802	45.5192	63.4969	62.7664
160.548	3.02258	3.03107	8.42468	8.39899	9.34412	9.65639	20.6683	20.7397	27.4174	28.1142	48.6168	48.4077	66.0997	64.7107	2.27039	2.28722	6.73596	6.70354	8.4679	8.73361	19.0591	19.2176	25.4762	26.3602	45.1007	45.5426	63.5272	62.7924
160.648	3.02051	3.03291	8.43848	8.40387	9.36353	9.66205	20.6841	20.7515	27.4272	28.1302	48.6538	48.4323	66.125	64.7379	2.27393	2.28876	6.74365	6.70752	8.4751	8.73871	19.0741	19.2285	25.4915	26.375	45.1201	45.566	63.5681	62.8184
160.748	3.02136	3.03475	8.43567	8.40875	9.36487	9.66771	20.6813	20.7633	27.4479	28.1463	48.6761	48.4568	66.1417	64.765	2.27722	2.2903	6.75061	6.7115	8.48254	8.7438	19.0807	19.2393	25.5026	26.3899	45.141	45.5894	63.5909	62.8444
160.848	3.02063	3.03659	8.4386	8.41363	9.37341	9.67337	20.6918	20.775	27.4564	28.1624	48.6969	48.4813	66.1681	64.7921	2.27234	2.29184	6.75183	6.71548	8.47766	8.7489	19.0876	19.2502	25.5131	26.4047	45.1534	45.6128	63.6093	62.8704
160.948	3.02563	3.03843	8.44141	8.41851	9.37671	9.67903	20.7065	20.7868	27.4792	28.1785	48.7136	48.5059	66.1885	64.8192	2.26953	2.29339	6.75268	6.71946	8.47485	8.75399	19.1003	19.2611	25.5222	26.4195	45.1799	45.6362	63.634	62.8964
161.048	3.02051	3.04027	8.44238	8.42338	9.3833	9.68469	20.7192	20.7986	27.4858	28.1945	48.728	48.5304	66.2188	64.8463	2.2644	2.29493	6.74951	6.72344	8.47534	8.75908	19.1177	19.2719	25.5381	26.4344	45.1985	45.6596	63.6541	62.9224
161.148	3.03003	3.04211	8.44629	8.42826	9.39868	9.69034	20.731	20.8103	27.4976	28.2106	48.7473	48.5549	66.25	64.8734	2.27197	2.29647	6.76318	6.72742	8.48535	8.76417	19.1218	19.2828	25.5601	26.4492	45.2158	45.683	63.6755	62.9483
161.248	3.03052	3.04395	8.45239	8.43314	9.40283	9.696	20.729	20.8221	27.519	28.2266	48.7771	48.5794	66.2813	64.9004	2.27051	2.29801	6.75	6.7314	8.4834	8.76926	19.1356	19.2936	25.5662	26.464	45.2434	45.7064	63.7109	62.9742
161.348	3.02844	3.04579	8.45032	8.43801	9.41858	9.70165	20.7428	20.8339	27.5289	28.2427	48.7946	48.6039	66.3165	64.9274	2.26843	2.29955	6.75354	6.73538	8.48547	8.77435	19.145	19.3045	25.5775	26.4788	45.2589	45.7298	63.7345	63.0001
161.448	3.03223	3.04762	8.45972	8.44289	9.42236	9.7073	20.76	20.8456	27.55	28.2587	48.8352	48.6284	66.3398	64.9544	2.27783	2.30109	6.76343	6.73936	8.50659	8.77943	19.1589	19.3154	25.5991	26.4936	45.2939	45.7531	63.7615	63.026
161.548	3.03223	3.04946	8.46948	8.44776	9.42236	9.71295	20.7778	20.8574	27.5757	28.2748	48.8608	48.6528	66.3789	64.9814	2.28393	2.30263	6.76904	6.74333	8.50464	8.78451	19.1687	19.3262	25.6145	26.5084	45.3154	45.7765	63.7908	63.0518
161.648	3.02661	3.0513	8.48145	8.45263	9.42822	9.7186	20.7778	20.8692	27.5779	28.2908	48.8748	48.6773	66.3965	65.0084	2.2666	2.30417	6.76172	6.74731	8.51489	8.7896	19.1667	19.3371	25.6265	26.5232	45.3335	45.7998	63.8108	63.0777
161.748	3.02051	3.05313	8.48145	8.4575	9.42627	9.72425	20.7932	20.8809	27.5835	28.3069	48.8882	48.7018	66.4258	65.0353	2.26611	2.30571	6.74756	6.75128	8.51441	8.79468	19.1746	19.3479	25.6382	26.538	45.3469	45.8231	63.8242	63.1035
161.848	3.02051	3.05497	8.48511	8.46237	9.42627	9.72989	20.8052	20.8927	27.603	28.3229	48.9077	48.7262	66.457	65.0623	2.27222	2.30725	6.75732	6.75526	8.52051	8.79976	19.1901	19.3587	25.6497	26.5528	45.3721	45.8465	63.8477	63.1293
161.948	3.02234	3.05681	8.48743	8.46725	9.43616	9.73554	20.8151	20.9044	27.6207	28.3389	48.9371	48.7507	66.4825	65.0892	2.27405	2.30879	6.76526	6.75923	8.52234	8.80484	19.2058	19.3696	25.6637	26.5676	45.3995	45.8698	63.869	63.1551
162.048	3.02441	3.05864	8.48535	8.47212	9.4397	9.74118	20.8264	20.9162	27.6304	28.3549	48.9546	48.7751	66.5056	65.1161	2.27612	2.31033	6.76123	6.7632	8.52441	8.80991	19.2108	19.3804	25.6868	26.5824	45.4211	45.8931	63.8906	63.1809
162.148	3.02161	3.06048	8.48254	8.47698	9.44299	9.74683	20.8414	20.9279	27.6354	28.371	48.9713	48.7995	66.5402	65.1429	2.27893	2.31187	6.76453	6.76717	8.52722	8.81499	19.2096	19.3913	25.6979	26.5971	45.4357	45.9164	63.913	63.2066
162.248	3.01672	3.06231	8.495	8.48185	9.43811	9.75247	20.8402	20.9396	27.6478	28.387	48.986	48.824	66.5548	65.1698	2.28015	2.3134	6.76331	6.77114	8.52844	8.82006	19.2349	19.4021	25.7047	26.6119	45.4718	45.9397	63.9393	63.2323
162.348	3.02612	3.06414	8.50488	8.48672	9.44751	9.75811	20.856	20.9514	27.6772	28.403	49.0247	48.8484	66.5898	65.1966	2.2876	2.31494	6.76904	6.77511	8.53223	8.82514	19.2351	19.4129	25.7085	26.6267	45.4875	45.963	63.9841	63.258
162.448	3.02637	3.06598	8.49902	8.49159	9.45557	9.76375	20.8674	20.9631	27.6909	28.419	49.0425	48.8728	66.6152	65.2235	2.28589	2.31648	6.76929	6.77908	8.53003	8.83021	19.2478	19.4238	25.7278	26.6414	45.499	45.9863	64.002	63.2837
162.548	3.02759	3.06781	8.50024	8.49646	9.46045	9.76938	20.8826	20.9749	27.7075	28.435	49.0688	48.8972	66.6416	65.2503	2.29272	2.31801	6.77051	6.78305	8.5354	8.83528	19.2468	19.4346	25.7388	26.6562	45.5259	46.0095	64.0227	63.3094
[truncated: 10,547 more rows]

## Sheet: Figure 4
	C						D
[truncated: 9 more rows]

## Sheet: Supplementary Figure S1_ConcDep
	Gd [µM]	Rel Int. Replicates
[truncated: 25 more rows]

[truncated: 3 more sheets: Supplementary Figure S3_SPR, Supplementary Figure S4_SPR_Sg, Supplementary Figure S5_InVivo]
