# Supplementary material
Source: Research Square preprint supplement (doi:10.21203/rs.3.rs-10127364/v1)
Supplement: Supplementary file 3 [file 66ccce4e7c2023b6da174882.docx]

Supporting Information for

**Two independent classes of allosteric transcription factors expand the regulatory landscape of bacterial guanidine metabolism**

M. Sinn1, I. Martin2,3, A. Herman1, A. Theisen1, O. Mayans2 and J. S. Hartig1,3

1 Department of Chemistry, University of Konstanz, Germany

2Department of Biology, University of Konstanz, Germany

3 Konstanz Research School Chemical Biology (KoRS-CB), University of Konstanz, Germany

**Table of Content**

Supplementary Figure 1: Guanidine concentration-dependent filter binding assay for GdnR.
 Supplementary Figure 2: GdnR filter binding assay.
 Supplementary Figure 3: SPR analysis of C. cellasea GdnR.
 Supplementary Figure 4: SPR analysis of *C. cellasea* GdnR binding to the *S. griseus* consensus motif.
 Supplementary Figure 5: *S. griseus* GdnR- and guanidine-dependent eGFP expression
 Supplementary Figure 6: Purification of *S. boeckii* GdcR.
 Supplementary Figure 7: Radiograph of the NC and NY membranes from the GdcR filter binding assay.
 Supplementary Table 1: Statistics for diffraction data processing and model building.
 Supplementary Table 2: Sequences of DNA oligonucleotides used in this study.
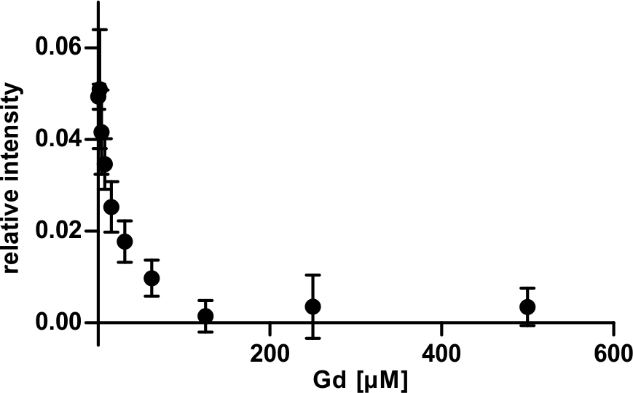
**Supplementary Figure 1**: **Guanidine concentration-dependent filter binding assay for GdnR.** *C. cellasea* GdnR was incubated with radioactively labelled DNA containing its cognate binding site. The binding reactions were supplemented with increasing guanidine concentration (0 µM to 500 µM). Relative intensity was calculated as the ratio of intensity on the nitrocellulose membrane to the combined intensities of the nitrocellulose and nylon membrane. The relative intensity of the control reaction without GdnR was subtracted. Data represent mean of technical replicates with error bars (n=3, s.d.).

**Supplementary Figure 2**: **GdnR filter binding assay**. Radiograph of the nitrocellulose and nylon membrane of the GdnR filter binding assay. GdnR from *S. griseus* and *C. cellasea* was incubated with radioactively labelled DNA comprising the respective binding site. The binding reaction was supplemented with 1 mM guanidine (+ Gd). Control reactions were set up without guanidine (-Gd) and without GdnR (-GdnR).
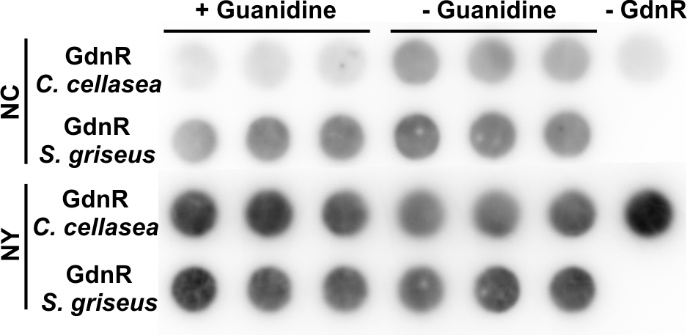


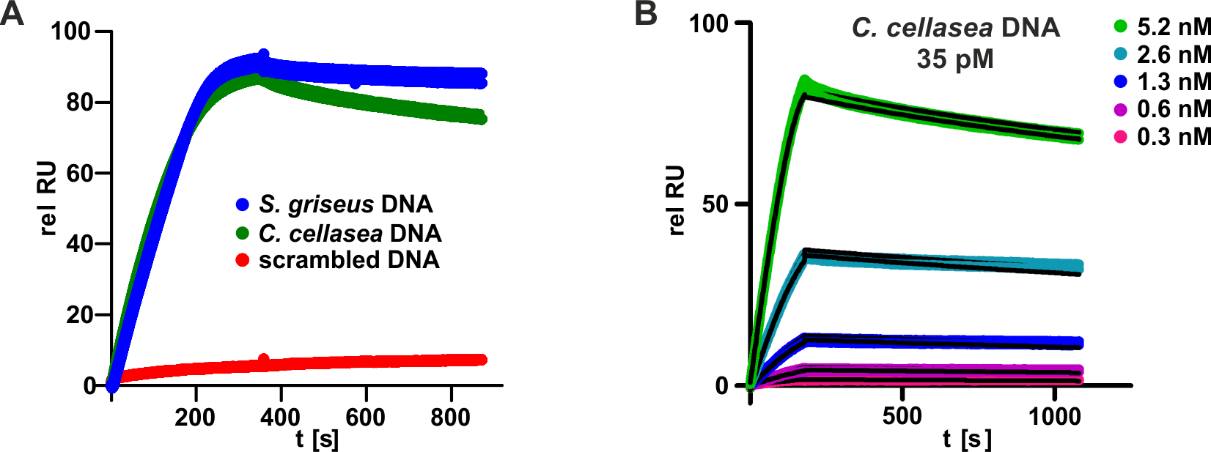


**Supplementary Figure 3**: **SPR analysis of *C. cellasea* GdnR. A** For the SPR analysis biotinylated DNA containing the binding motif of *S. griseus* or *C. cellasea* were immobilized on a SA-sensor chip. The scrambled *C. cellasea* DNA served as a control (Supplementary Table 2). GdnR (5 nM) of was injected and binding was monitored for all DNA. Experiment was performed in technical duplicates. **B** Replication of the SPR analysis of the *C. cellasea* interaction with its cognate DNA binding site (Figure 2E). GdnR was injected at different concentrations. Data were fitted by kinetic analysis assuming 1:1 binding (black lines). Experiment was performed in technical duplicates.


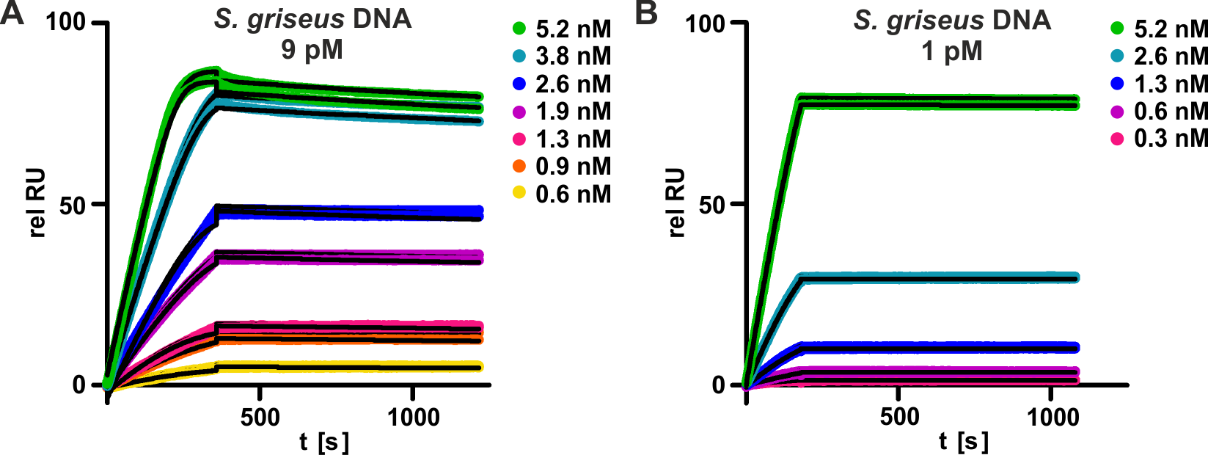
**Supplementary Figure 4**: **SPR analysis of *C. cellasea* GdnR binding to the *S. griseus* consensus motif.** *C. cellasea* GdnR was injected at different concentrations. Data were fitted by kinetic analysis assuming 1:1 binding (black lines). Experiment was performed in technical duplicates. A and B represent two independent experiments.


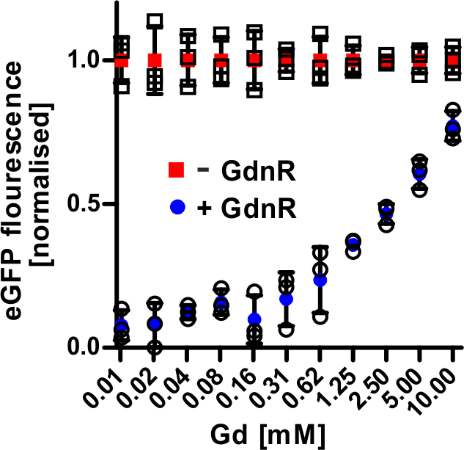
**Supplementary Figure 5**: ***S. griseus*** **GdnR- and guanidine-dependent eGFP expression**. eGFP expression was put under control of GdnR by cloning the *S. griseus* GdnR binding site close to the constitutive eGFP promoter. *S. griseus* GdnR expression was induced by 10 µM of IPTG (+ GdnR). Samples without IPTG were run as control (-GdnR). Medium was supplemented with guanidine (10 µM to 10 mM). eGFP fluorescence was corrected by cell density and normalized. Data represent the mean of biological triplicates with error bars (n=3, s.d.).

**Supplementary Figure 6**: **Purification of *S. boeckii* GdcR**. Coomassie-stained denaturing PA-gel analysing the steps of GdcR purification. Desalted protein was used for experiments.

**
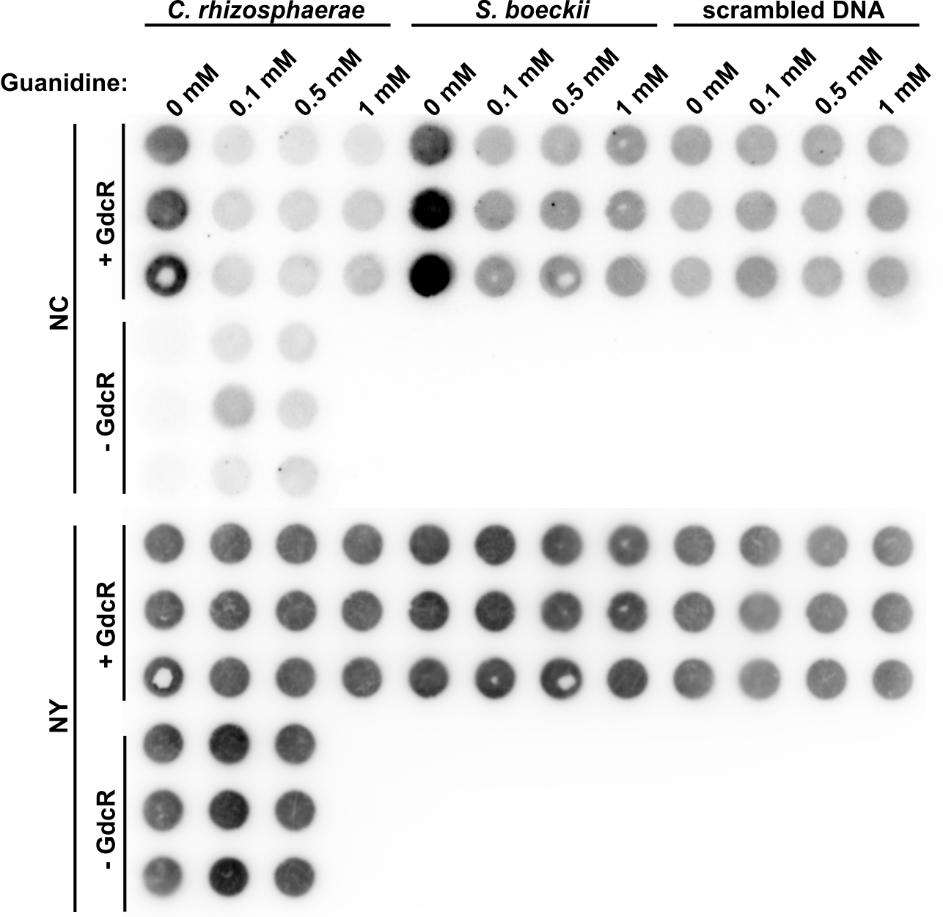
Supplementary Figure 7**: Radiograph of the NC and NY membranes from the GdcR filter binding assay (Figure 4).

**Supplementary Table 1:** Statistics for diffraction data processing and model building.

**GdnR/Gd**

PDB code 30PE

Space group P3112

Cell dimensions: a,b,c (Å) 95.09, 95.20, 181.100

Copies in a.u. 1

**Data Processing**

Beamline P13, PETRA III, DESY

Detector Dectris EIGER1 Si 16M

Wavelength (Å) 0.9763

Resolution (Å) 25.0 - 1.22 (1.23 -1.22)a

No. Reflections 68648 (1624)a

Rsym(I) (%) 5.5 (293.2)a

23.76 (1.03)a

CC1/2 (%) 100.0 (36.4)a

Completeness (%) 100.0 (100.0)a

Multiplicity 20.0 (20.4)a

**Model Refinement**

No. working/free reflections 68586/2008

Rwork/Rfree (%) 13.68/15.24

No. Atoms Protein 3316

No. Atoms Solvent 296

No. of Ligands / Atoms 1 x Gdb / 9

Average B factors (Å2)

Protein 31.66

Solvent 45.15

Ligands 18.37

R.m.s.d. bond length (Å) 0.007

R.m.s.d. angles (°) 0.932

Ramachandran plot

Favoured/Outliers (%) 98.07/0.0

a Values in parentheses correspond to the highest resolution shell; b Gd: Guanidinium.

**Supplementary Table 2:** Sequences of DNA oligonucleotides used in this study.

| Description | Sequence (5’ to 3’) |
| --- | --- |
| GdnR binding site, *S. griseus*, fwd | [Btn]AATCCATAGAGGTATACCTGTCGATCGACAGGTATTGCGATAGTGAGG |
| GdnR binding site, *S. griseus*, rev | CCTCACTATCGCAATACCTGTCGATCGACAGG  TATACCTCTATGGATT |
| GdnR binding site, *C. cellasea*, fwd | [Btn]GGCCCTCCCCGTGGTTCCTGTCGGCTGACAG  GAACACAGTGCGAGGCG |
| GdnR binding site, *C. cellasea*, rev | CGCCTCGCACTGTGTTCCTGTCAGCCGACAG  GAACCACGGGGAGGGCC |
| Scrambled GdnR binding site, C. *cellasea,* fwd | [BTn]CAGGAATGGAGCAGTAGCAACTGTTAGC  TAGTTAAATTTGCCTACGGG |
| Scrambled GdnR binding site, C. *cellasea* rev | CCCGTAGGCAAATTTAACTAGCTAACAGTTG  CTACTGCTCCATTCCTG |
| Backbone generation for reporter construct, fwd | GCTAGCATTATACCTAGGACTGAGC |
| Backbone generation for reporter construct, rev | AAGAAGGAGATATACCATGGGCC |
| Gibson assembly insert with GdnR binding site for reporter construct, *S. griseus*, fwd | CTAGGTATAATGCTAGCCATAGAGGTATACCTGTCGATCGACAGGTATTGCGATAGTAAGAAGGAGATATAC |
| Gibson assembly insert with GdnR binding site for reporter construct, *S. griseus*, rev | GTATATCTCCTTCTTACTATCGCAATACCTGTCGATCGACAGGTATACCTCTATGGCTAGCATTATACCTAG |
| GdcR binding site, *S. boeckii*, fwd | TTCAGTATTACATATTGCATCCTTCGTAATATCGC |
| GdcR binding site, *S. boeckii*, rev | GGCGATATTACGAAGGATGCAATATGTAATACT |
| GdcR binding site, *C. rhizosphaerae*, fwd | ATTGATATTACCAATTCCCGCAATAGTAATAATCG |
| GdcR binding site, *C. rhizosphaerae*, rev | CCGATTATTACTATTGCGGGAATTGGTAATATCA |
| Scrambled GdcR binding site, *S. boeckii*, fwd | ATTGAACTATATATATTACACATGCCTAGACATCG |
| Scrambled GdcR binding site, *S. boeckii*, rev | CCGATGTCTAGGCATGTGTAATATATATAGTTCA |
| Gibson assembly insert with GdnR binding site for reporter construct, *S. boeckii*, fwd | AGGTATAATGCTAGCTATTACCAATTCCCGCAATAGTAATAAGAAGGAGATATAC |
| Gibson assembly insert with GdnR binding site for reporter construct, *S. boeckii*, rev | GTATATCTCCTTCTTTATTACTATTGCGGGAATTGGTATAGCTAGCATTATACCT |
